# Supplementary material
Source: Research Square preprint supplement (doi:10.21203/rs.3.rs-8942208/v1)
Supplement: Supplementary file 1 [file cf64b9c43f22b002616b96a9.xlsx]

## Sheet: Sheet1
wavelength	Absorbance						Energy(eV)	Thickness (cm)						(Alpha) Absorption coefficent (1/cm)						ln(alpha)						(alpha*energy)^2						(alpha*energy)^1/2						Composition		molar fraction of the oxide of the fabricated glasses (x) or rat					Molar Mass (gm /mol)		Density (gm/cm3)		Molar volume (gm/cm3)
	BPNC0	BPNC1	BPNC2	BPNC3	BPNC4	BPNC5		BPNC0	BPNC1	BPNC2	BPNC3	BPNC4	BPNC5	BPNC0	BPNC1	BPNC2	BPNC3	BPNC4	BPNC5	BPNC0	BPNC1	BPNC2	BPNC3	BPNC4	BPNC5	BPNC0	BPNC1	BPNC2		BPNC4	BPNC5	BPNC0	BPNC1	BPNC2	BPNC3	BPNC4	BPNC5	ratio	Molar Mass(g/mole)	sample	B2O3	P2O5	Na2O	CaO
900	0.256637	0.24154	0.0983412	0.184503	0.298906	0.373724	1.37778	0.451	0.463	0.568	0.454	0.448	0.451	1.30993	1.20092	0.398559	0.93552	1.5359	1.90757	0.269974	0.183086	-0.9199	-0.0666532	0.429114	0.645829	3.25728	2.7377	0.301539	1.66136	4.47798	6.90745	1.34343	1.28631	0.74103	1.13531	1.45469	1.62117			BPNC0	0.65	0.15	0.2	0	BPNC0	100.232	BPNC0	2.163	46.3396
899.5	0.256664	0.241709	0.0982845	0.184509	0.299006	0.373565	1.37854	0.451	0.463	0.568	0.454	0.448	0.451	1.31007	1.20176	0.398329	0.93555	1.53641	1.90676	0.270079	0.183786	-0.920477	-0.0666206	0.429449	0.645403	3.26158	2.74458	0.301526	1.66332	4.48596	6.90925	1.34387	1.28712	0.741022	1.13565	1.45534	1.62128	(65-x) B2O3	69.6182	BPNC1	0.625	0.15	0.2	0.025	BPNC1	99.8939	BPNC1	2.444	40.8731
899	0.256708	0.241583	0.0982595	0.184472	0.29915	0.373675	1.37931	0.451	0.463	0.568	0.454	0.448	0.451	1.31029	1.20113	0.398228	0.935362	1.53715	1.90732	0.27025	0.183264	-0.920731	-0.0668212	0.42993	0.645697	3.26633	2.74477	0.301708	1.6645	4.49528	6.92101	1.34436	1.28714	0.741134	1.13585	1.45609	1.62197			BPNC2	0.6	0.15	0.2	0.05	BPNC2	99.5554	BPNC2	2.337	42.5997
898.5	0.256646	0.24154	0.0984515	0.184644	0.298901	0.374032	1.38008	0.451	0.463	0.568	0.454	0.448	0.451	1.30998	1.20092	0.399006	0.936235	1.53587	1.90914	0.270009	0.183086	-0.918779	-0.0658892	0.429097	0.646652	3.26839	2.74684	0.303226	1.66946	4.49279	6.94196	1.34457	1.28739	0.742064	1.1367	1.45589	1.62319	15 P2O5	283.899	BPNC3	0.575	0.15	0.2	0.075	BPNC3	99.2169	BPNC3	2.416	41.0666
898	0.25671	0.241763	0.0984812	0.184549	0.29904	0.373854	1.38085	0.451	0.463	0.568	0.454	0.448	0.451	1.3103	1.20203	0.399126	0.935753	1.53658	1.90823	0.270258	0.184009	-0.918477	-0.0664039	0.429562	0.646176	3.27366	2.75498	0.303747	1.6696	4.50198	6.94308	1.34511	1.28834	0.742383	1.13672	1.45664	1.62326	20 Na2O	61.9789	BPNC4	0.55	0.15	0.2	0.1	BPNC4	98.8784	BPNC4	2.532	39.0515
897.5	0.25672	0.241721	0.0984645	0.184618	0.298928	0.373993	1.38162	0.451	0.463	0.568	0.454	0.448	0.451	1.31035	1.20182	0.399059	0.936103	1.53601	1.90894	0.270297	0.183835	-0.918647	-0.0660301	0.429188	0.646548	3.27757	2.7571	0.303982	1.67271	4.50363	6.95599	1.34551	1.28858	0.742526	1.13725	1.45677	1.62401			BPNC5	0.5	0.15	0.2	0.15	BPNC5	98.2013	BPNC5	2.499	39.2963
897	0.256711	0.24164	0.0984229	0.184514	0.298946	0.374038	1.38239	0.451	0.463	0.568	0.454	0.448	0.451	1.31031	1.20142	0.39889	0.935575	1.5361	1.90917	0.270262	0.1835	-0.91907	-0.0665935	0.429248	0.646668	3.28099	2.75832	0.304064	1.67269	4.50919	6.96542	1.34586	1.28873	0.742576	1.13724	1.45722	1.62456	X CaO	56.0774
896.5	0.256751	0.241729	0.0983434	0.18463	0.299182	0.373799	1.38316	0.451	0.463	0.568	0.454	0.448	0.451	1.31051	1.20186	0.398568	0.936164	1.53731	1.90795	0.270418	0.183869	-0.919878	-0.0659651	0.430037	0.646029	3.28568	2.76343	0.303912	1.67666	4.52135	6.96429	1.34634	1.28932	0.742483	1.13792	1.4582	1.6245
896	0.256778	0.241738	0.0985794	0.184505	0.299151	0.374121	1.38393	0.451	0.463	0.568	0.454	0.448	0.451	1.31065	1.2019	0.399524	0.93553	1.53716	1.90959	0.270523	0.183906	-0.917481	-0.0666423	0.429934	0.64689	3.29004	2.76672	0.305713	1.67626	4.52546	6.98408	1.34679	1.28971	0.743581	1.13785	1.45853	1.62565
895.5	0.256795	0.241704	0.0984911	0.184692	0.29921	0.373898	1.3847	0.451	0.463	0.568	0.454	0.448	0.451	1.31074	1.20173	0.399166	0.936478	1.53746	1.90845	0.270589	0.183765	-0.918377	-0.0656293	0.430131	0.646294	3.29415	2.76904	0.305506	1.68154	4.5323	6.98355	1.34721	1.28998	0.743456	1.13875	1.45908	1.62562
895	0.256747	0.24173	0.098526	0.184572	0.299088	0.374	1.38547	0.451	0.463	0.568	0.454	0.448	0.451	1.31049	1.20186	0.399308	0.935869	1.53683	1.90898	0.270402	0.183873	-0.918023	-0.0662793	0.429723	0.646567	3.2966	2.77273	0.306065	1.68123	4.53367	6.99517	1.34746	1.29041	0.743795	1.13869	1.45919	1.6263
894.5	0.256748	0.241835	0.0985014	0.184572	0.299222	0.374231	1.38625	0.451	0.463	0.568	0.454	0.448	0.451	1.3105	1.20238	0.399208	0.935869	1.53752	1.91015	0.270406	0.184307	-0.918272	-0.0662793	0.430171	0.647184	3.30031	2.77824	0.306254	1.68311	4.54281	7.01164	1.34784	1.29105	0.74391	1.13901	1.45993	1.62725
894	0.256732	0.2419	0.0985795	0.184735	0.299141	0.374278	1.38702	0.451	0.463	0.568	0.454	0.448	0.451	1.31041	1.20271	0.399525	0.936696	1.5371	1.91039	0.270344	0.184576	-0.91748	-0.0653965	0.4299	0.64731	3.30359	2.78284	0.307083	1.68797	4.54543	7.02125	1.34818	1.29158	0.744413	1.13983	1.46014	1.62781
893.5	0.256822	0.241884	0.098554	0.184781	0.299301	0.373964	1.3878	0.451	0.463	0.568	0.454	0.448	0.451	1.31087	1.20263	0.399421	0.936929	1.53793	1.90879	0.270694	0.18451	-0.917738	-0.0651475	0.430435	0.646471	3.30961	2.78559	0.307268	1.6907	4.55539	7.01732	1.34879	1.2919	0.744525	1.14029	1.46094	1.62758
893	0.256849	0.241899	0.0985959	0.184736	0.299332	0.374107	1.38858	0.451	0.463	0.568	0.454	0.448	0.451	1.31101	1.2027	0.399591	0.936701	1.53809	1.90952	0.270799	0.184572	-0.917313	-0.0653911	0.430538	0.646853	3.31401	2.78906	0.307873	1.69177	4.56143	7.03056	1.34924	1.2923	0.744892	1.14047	1.46142	1.62835
892.5	0.25689	0.242018	0.0986677	0.184796	0.299301	0.374364	1.38936	0.451	0.463	0.568	0.454	0.448	0.451	1.31122	1.20329	0.399882	0.937005	1.53793	1.91083	0.270959	0.185063	-0.916585	-0.0650664	0.430435	0.64754	3.31878	2.79493	0.308667	1.69477	4.5656	7.04811	1.34972	1.29298	0.745371	1.14098	1.46175	1.62936
892	0.256884	0.241925	0.0986888	0.18474	0.299398	0.374144	1.39013	0.451	0.463	0.568	0.454	0.448	0.451	1.31119	1.20283	0.399968	0.936721	1.53842	1.90971	0.270936	0.184679	-0.916372	-0.0653695	0.430759	0.646952	3.32235	2.79591	0.309146	1.69564	4.57368	7.04772	1.35009	1.2931	0.74566	1.14113	1.4624	1.62934
891.5	0.256913	0.242068	0.0987506	0.184798	0.299473	0.374125	1.39091	0.451	0.463	0.568	0.454	0.448	0.451	1.31134	1.20354	0.400218	0.937015	1.53881	1.90961	0.271048	0.18527	-0.915746	-0.0650556	0.431009	0.646901	3.32683	2.80236	0.30988	1.69861	4.58111	7.05491	1.35054	1.29384	0.746103	1.14163	1.46299	1.62976
891	0.256915	0.242228	0.0987993	0.184912	0.299583	0.374277	1.39169	0.451	0.463	0.568	0.454	0.448	0.451	1.31135	1.20434	0.400415	0.937593	1.53938	1.91039	0.271056	0.185931	-0.915253	-0.0644389	0.431377	0.647307	3.33062	2.80922	0.310534	1.70262	4.58962	7.06857	1.35092	1.29463	0.746496	1.1423	1.46367	1.63055
890.5	0.256974	0.242032	0.0988261	0.184938	0.29956	0.374097	1.39248	0.451	0.463	0.568	0.454	0.448	0.451	1.31165	1.20336	0.400524	0.937725	1.53926	1.90947	0.271286	0.185121	-0.914981	-0.0642983	0.4313	0.646826	3.33589	2.80782	0.311052	1.70501	4.59407	7.06971	1.35146	1.29447	0.746807	1.1427	1.46403	1.63061
890	0.256936	0.242289	0.0988293	0.184886	0.299508	0.374372	1.39326	0.451	0.463	0.568	0.454	0.448	0.451	1.31146	1.20464	0.400537	0.937462	1.53899	1.91087	0.271138	0.186182	-0.914949	-0.0645795	0.431126	0.647561	3.33865	2.81695	0.311422	1.70597	4.59764	7.08806	1.35174	1.29552	0.747029	1.14286	1.46431	1.63167
889.5	0.256912	0.242325	0.0986917	0.184916	0.299597	0.374403	1.39404	0.451	0.463	0.568	0.454	0.448	0.451	1.31133	1.20482	0.399979	0.937614	1.53945	1.91103	0.271045	0.186331	-0.916342	-0.0644172	0.431423	0.647644	3.34178	2.82096	0.310904	1.70844	4.60554	7.09721	1.35206	1.29598	0.746718	1.14327	1.46494	1.63219
889	0.257	0.242087	0.0988444	0.184895	0.299855	0.374519	1.39483	0.451	0.463	0.568	0.454	0.448	0.451	1.31178	1.20364	0.400598	0.937507	1.54077	1.91162	0.271387	0.185348	-0.914796	-0.0645308	0.432284	0.647954	3.34783	2.81859	0.312218	1.70997	4.61867	7.1096	1.35267	1.29571	0.747506	1.14353	1.46598	1.63291
888.5	0.257072	0.242153	0.0988822	0.185009	0.299949	0.374421	1.39561	0.451	0.463	0.568	0.454	0.448	0.451	1.31215	1.20397	0.400751	0.938085	1.54126	1.91112	0.271667	0.185621	-0.914414	-0.0639144	0.432598	0.647692	3.35348	2.8233	0.312809	1.71401	4.62677	7.11388	1.35324	1.29625	0.747859	1.1442	1.46663	1.63315
888	0.257056	0.242189	0.0989165	0.184963	0.299825	0.374688	1.3964	0.451	0.463	0.568	0.454	0.448	0.451	1.31207	1.20414	0.40089	0.937852	1.54062	1.91249	0.271605	0.18577	-0.914067	-0.0641631	0.432184	0.648405	3.35684	2.82732	0.313378	1.71509	4.62815	7.13205	1.35358	1.29671	0.748199	1.14438	1.46674	1.63419
887.5	0.25707	0.242208	0.0989827	0.184972	0.299931	0.374769	1.39718	0.451	0.463	0.568	0.454	0.448	0.451	1.31214	1.20424	0.401159	0.937898	1.54116	1.9129	0.271659	0.185848	-0.913398	-0.0641144	0.432538	0.648621	3.36099	2.83095	0.314152	1.71719	4.63665	7.14318	1.35399	1.29713	0.74866	1.14473	1.46741	1.63483
887	0.257008	0.242359	0.0990151	0.185022	0.300203	0.374857	1.39797	0.451	0.463	0.568	0.454	0.448	0.451	1.31182	1.20499	0.40129	0.938151	1.54256	1.91335	0.271418	0.186471	-0.913071	-0.0638442	0.433444	0.648856	3.36316	2.83768	0.314712	1.72005	4.6503	7.15459	1.35421	1.2979	0.748994	1.14521	1.46849	1.63548
886.5	0.256982	0.242244	0.0989415	0.184978	0.299991	0.374596	1.39876	0.451	0.463	0.568	0.454	0.448	0.451	1.31169	1.20442	0.400992	0.937928	1.54147	1.91202	0.271317	0.185997	-0.913814	-0.064082	0.432738	0.648159	3.36627	2.83818	0.314599	1.72117	4.64897	7.1527	1.35453	1.29796	0.748927	1.1454	1.46838	1.63538
886	0.257048	0.242394	0.0989567	0.185012	0.299994	0.374836	1.39955	0.451	0.463	0.568	0.454	0.448	0.451	1.31203	1.20516	0.401053	0.9381	1.54149	1.91324	0.271574	0.186616	-0.913661	-0.0638982	0.432748	0.6488	3.3718	2.84491	0.315051	1.72375	4.65431	7.16995	1.35508	1.29872	0.749195	1.14583	1.4688	1.63636
885.5	0.257113	0.242462	0.0990491	0.184998	0.30006	0.375011	1.40034	0.451	0.463	0.568	0.454	0.448	0.451	1.31236	1.2055	0.401428	0.93803	1.54183	1.91414	0.271827	0.186896	-0.912727	-0.0639739	0.432968	0.649266	3.37732	2.84972	0.315996	1.72544	4.66162	7.18475	1.35564	1.29927	0.749757	1.14611	1.46938	1.6372
885	0.257202	0.242378	0.0990683	0.185129	0.300138	0.374838	1.40113	0.451	0.463	0.568	0.454	0.448	0.451	1.31281	1.20508	0.401506	0.938694	1.54223	1.91325	0.272173	0.18655	-0.912534	-0.063266	0.433227	0.648805	3.38348	2.85096	0.316476	1.72983	4.66932	7.18624	1.35625	1.29942	0.750041	1.14684	1.46999	1.63729
884.5	0.257194	0.242524	0.0991481	0.185281	0.300484	0.374987	1.40192	0.451	0.463	0.568	0.454	0.448	0.451	1.31277	1.20581	0.401829	0.939464	1.544	1.91401	0.272142	0.187152	-0.911728	-0.0624453	0.43438	0.649202	3.38709	2.85763	0.317344	1.73464	4.68538	7.20009	1.35662	1.30017	0.750555	1.14763	1.47125	1.63808
884	0.257248	0.242481	0.0992092	0.185361	0.300391	0.375164	1.40271	0.451	0.463	0.568	0.454	0.448	0.451	1.31305	1.2056	0.402077	0.93987	1.54353	1.91492	0.272352	0.186975	-0.911112	-0.0620136	0.43407	0.649674	3.39235	2.85985	0.318095	1.7381	4.68778	7.21504	1.35714	1.30043	0.750999	1.1482	1.47144	1.63893
883.5	0.257256	0.242503	0.0991009	0.185276	0.300338	0.375164	1.40351	0.451	0.463	0.568	0.454	0.448	0.451	1.31309	1.20571	0.401638	0.939439	1.54325	1.91492	0.272383	0.187065	-0.912205	-0.0624723	0.433894	0.649674	3.3964	2.86361	0.31776	1.73847	4.69143	7.22321	1.35755	1.30085	0.750801	1.14826	1.47172	1.63939
883	0.257238	0.242691	0.0992481	0.185394	0.300319	0.375095	1.4043	0.451	0.463	0.568	0.454	0.448	0.451	1.313	1.20664	0.402234	0.940037	1.54316	1.91456	0.272313	0.18784	-0.91072	-0.0618356	0.43383	0.64949	3.39977	2.8713	0.319066	1.74266	4.69615	7.22873	1.35788	1.30173	0.751571	1.14896	1.47209	1.6397
882.5	0.257281	0.242735	0.0992908	0.185307	0.300042	0.375077	1.4051	0.451	0.463	0.568	0.454	0.448	0.451	1.31322	1.20686	0.402407	0.939596	1.54173	1.91447	0.27248	0.188022	-0.91029	-0.062305	0.432908	0.649442	3.40476	2.87559	0.319702	1.743	4.69281	7.23623	1.35838	1.30221	0.751946	1.14901	1.47183	1.64013
882	0.257254	0.242876	0.0991217	0.185338	0.300577	0.375434	1.4059	0.451	0.463	0.568	0.454	0.448	0.451	1.31308	1.20756	0.401722	0.939753	1.54448	1.9163	0.272375	0.188602	-0.911995	-0.0621377	0.434689	0.650394	3.40791	2.8822	0.318976	1.74556	4.7149	7.25823	1.3587	1.30296	0.751518	1.14943	1.47356	1.64137
881.5	0.25727	0.242794	0.0993048	0.185379	0.300253	0.375484	1.40669	0.451	0.463	0.568	0.454	0.448	0.451	1.31316	1.20715	0.402464	0.939961	1.54282	1.91655	0.272437	0.188265	-0.910149	-0.0619165	0.433611	0.650527	3.4122	2.88352	0.320519	1.74831	4.71008	7.26841	1.35912	1.30311	0.752425	1.14989	1.47318	1.64195
881	0.257369	0.24272	0.0993011	0.185483	0.300196	0.375582	1.40749	0.451	0.463	0.568	0.454	0.448	0.451	1.31367	1.20678	0.402449	0.940489	1.54252	1.91705	0.272822	0.18796	-0.910186	-0.0613557	0.433421	0.650788	3.4187	2.88504	0.320859	1.75226	4.71364	7.28046	1.35977	1.30328	0.752625	1.15053	1.47346	1.64263
880.5	0.257315	0.24289	0.0994396	0.185512	0.300348	0.375653	1.40829	0.451	0.463	0.568	0.454	0.448	0.451	1.31339	1.20763	0.40301	0.940636	1.54331	1.91741	0.272612	0.18866	-0.908793	-0.0611993	0.433927	0.650977	3.42115	2.89236	0.32212	1.7548	4.72377	7.29148	1.36001	1.30411	0.753363	1.15095	1.47425	1.64325
880	0.257455	0.243045	0.0993254	0.185505	0.300224	0.375666	1.40909	0.451	0.463	0.568	0.454	0.448	0.451	1.31411	1.2084	0.402548	0.9406	1.54267	1.91748	0.273156	0.189298	-0.909942	-0.0612371	0.433514	0.651011	3.42877	2.89935	0.321746	1.75666	4.72524	7.30028	1.36077	1.30489	0.753144	1.15126	1.47437	1.64375
879.5	0.257381	0.242848	0.0993683	0.18547	0.300503	0.375605	1.40989	0.451	0.463	0.568	0.454	0.448	0.451	1.31373	1.20742	0.402722	0.940423	1.5441	1.91717	0.272868	0.188487	-0.90951	-0.0614257	0.434443	0.650849	3.4307	2.89794	0.32239	1.758	4.73941	7.30621	1.36096	1.30474	0.753521	1.15147	1.47547	1.64408
879	0.257392	0.243166	0.0994315	0.185451	0.300671	0.375728	1.41069	0.451	0.463	0.568	0.454	0.448	0.451	1.31378	1.209	0.402978	0.940326	1.54497	1.9178	0.272911	0.189796	-0.908874	-0.0615282	0.435002	0.651176	3.43489	2.90884	0.323167	1.75964	4.75011	7.31931	1.36138	1.30596	0.753975	1.15174	1.4763	1.64482
878.5	0.257396	0.243053	0.0993682	0.185442	0.300747	0.375794	1.4115	0.451	0.463	0.568	0.454	0.448	0.451	1.3138	1.20844	0.402721	0.940281	1.54536	1.91813	0.272927	0.189331	-0.909511	-0.0615767	0.435254	0.651352	3.43891	2.90945	0.323124	1.76147	4.75792	7.33022	1.36177	1.30603	0.753949	1.15204	1.47691	1.64543
878	0.257494	0.243007	0.0995324	0.185832	0.300963	0.375847	1.4123	0.451	0.463	0.568	0.454	0.448	0.451	1.3143	1.20821	0.403387	0.942258	1.54647	1.9184	0.273307	0.189142	-0.90786	-0.0594758	0.435972	0.651493	3.44545	2.91166	0.324562	1.7709	4.77018	7.34064	1.36242	1.30628	0.754787	1.15358	1.47786	1.64601
877.5	0.257525	0.243156	0.0995769	0.185398	0.300936	0.376399	1.41311	0.451	0.463	0.568	0.454	0.448	0.451	1.31446	1.20895	0.403567	0.940058	1.54633	1.92122	0.273428	0.189754	-0.907413	-0.061814	0.435883	0.652961	3.45021	2.91855	0.325222	1.76465	4.77477	7.37061	1.36289	1.30705	0.755171	1.15256	1.47822	1.64769
877	0.257454	0.243296	0.0995277	0.185715	0.301014	0.375744	1.41391	0.451	0.463	0.568	0.454	0.448	0.451	1.3141	1.20965	0.403368	0.941665	1.54673	1.91788	0.273152	0.19033	-0.907907	-0.0601056	0.436142	0.651219	3.45224	2.92525	0.325272	1.77271	4.78269	7.35336	1.36309	1.3078	0.755199	1.15388	1.47883	1.64673
876.5	0.257588	0.24316	0.099563	0.185653	0.301153	0.376175	1.41472	0.451	0.463	0.568	0.454	0.448	0.451	1.31478	1.20897	0.403511	0.941351	1.54744	1.92008	0.273672	0.189771	-0.907552	-0.0604395	0.436604	0.652365	3.45978	2.92531	0.325874	1.77355	4.79257	7.37865	1.36384	1.30781	0.755549	1.15401	1.47959	1.64814
876	0.257591	0.243356	0.099635	0.185711	0.300971	0.376354	1.41553	0.451	0.463	0.568	0.454	0.448	0.451	1.3148	1.20995	0.403802	0.941645	1.54651	1.92099	0.273684	0.190577	-0.90683	-0.0601272	0.435999	0.652841	3.46381	2.93338	0.326718	1.77668	4.79225	7.39411	1.36423	1.30871	0.756037	1.15452	1.47957	1.649
875.5	0.257502	0.243352	0.0996042	0.185734	0.301105	0.376286	1.41633	0.451	0.463	0.568	0.454	0.448	0.451	1.31435	1.20993	0.403678	0.941761	1.5472	1.92064	0.273338	0.19056	-0.907139	-0.0600033	0.436444	0.65266	3.46537	2.93663	0.326889	1.77915	4.80199	7.39988	1.36439	1.30907	0.756136	1.15492	1.48032	1.64932
875	0.257572	0.243663	0.0997757	0.185606	0.301017	0.376155	1.41714	0.451	0.463	0.568	0.454	0.448	0.451	1.3147	1.21147	0.404373	0.941112	1.54674	1.91998	0.27361	0.191837	-0.905418	-0.0606927	0.436152	0.652312	3.47122	2.94751	0.328391	1.77873	4.80467	7.40318	1.36496	1.31028	0.757003	1.15486	1.48053	1.64951
874.5	0.257635	0.243589	0.0997667	0.18581	0.301291	0.376315	1.41795	0.451	0.463	0.568	0.454	0.448	0.451	1.31502	1.21111	0.404336	0.942147	1.54815	1.92079	0.273855	0.191534	-0.905509	-0.0595942	0.437062	0.652738	3.47689	2.94909	0.328707	1.78468	4.81893	7.41796	1.36552	1.31045	0.757185	1.15582	1.48162	1.65033
874	0.257678	0.243484	0.0997359	0.185796	0.30134	0.376346	1.41876	0.451	0.463	0.568	0.454	0.448	0.451	1.31524	1.21058	0.404211	0.942076	1.5484	1.92095	0.274022	0.191102	-0.905817	-0.0596696	0.437224	0.65282	3.48203	2.94992	0.32888	1.78646	4.82602	7.42767	1.36602	1.31055	0.757285	1.15611	1.48217	1.65087
873.5	0.257709	0.243742	0.0997056	0.185991	0.301312	0.376508	1.41958	0.451	0.463	0.568	0.454	0.448	0.451	1.3154	1.21187	0.404089	0.943064	1.54826	1.92178	0.274142	0.192162	-0.906121	-0.0586206	0.437131	0.65325	3.48686	2.95956	0.329057	1.79226	4.83064	7.44258	1.3665	1.31162	0.757387	1.15704	1.48252	1.6517
873	0.257754	0.243585	0.0997154	0.185814	0.301227	0.376408	1.42039	0.451	0.463	0.568	0.454	0.448	0.451	1.31563	1.21109	0.404128	0.942167	1.54782	1.92127	0.274317	0.191517	-0.906023	-0.0595727	0.436849	0.652985	3.49207	2.95913	0.329498	1.7909	4.83345	7.44715	1.36701	1.31157	0.757641	1.15683	1.48274	1.65195
872.5	0.257736	0.243645	0.0998151	0.185898	0.301418	0.376801	1.4212	0.451	0.463	0.568	0.454	0.448	0.451	1.31554	1.21138	0.404532	0.942593	1.5488	1.92327	0.274247	0.191764	-0.905024	-0.0591208	0.437483	0.654028	3.49559	2.96399	0.330536	1.79457	4.84513	7.47127	1.36735	1.31211	0.758237	1.15742	1.48363	1.65329
872	0.257736	0.243825	0.0999766	0.18585	0.301784	0.376894	1.42202	0.451	0.463	0.568	0.454	0.448	0.451	1.31554	1.21228	0.405187	0.94235	1.55068	1.92375	0.274247	0.192502	-0.903407	-0.059379	0.438697	0.654275	3.4996	2.97177	0.331987	1.7957	4.86248	7.48353	1.36774	1.31297	0.759067	1.1576	1.48496	1.65397
871.5	0.257794	0.243647	0.0997628	0.185995	0.301421	0.376936	1.42283	0.451	0.463	0.568	0.454	0.448	0.451	1.31584	1.21139	0.40432	0.943085	1.54882	1.92396	0.274472	0.191772	-0.905548	-0.0585991	0.437493	0.654386	3.50519	2.97084	0.330948	1.80057	4.85635	7.49379	1.36829	1.31286	0.758473	1.15838	1.48449	1.65453
871	0.257771	0.243906	0.099936	0.1859	0.301444	0.376967	1.42365	0.451	0.463	0.568	0.454	0.448	0.451	1.31572	1.21268	0.405022	0.942603	1.54894	1.92412	0.274383	0.192834	-0.903813	-0.05911	0.437569	0.654469	3.50859	2.98058	0.33248	1.8008	4.86267	7.50363	1.36862	1.31394	0.759349	1.15842	1.48497	1.65508
870.5	0.257798	0.243814	0.0999739	0.186127	0.301851	0.37695	1.42447	0.451	0.463	0.568	0.454	0.448	0.451	1.31586	1.21222	0.405176	0.943754	1.55103	1.92403	0.274487	0.192457	-0.903434	-0.0578897	0.438919	0.654424	3.51336	2.98175	0.333114	1.80727	4.88141	7.51157	1.36909	1.31407	0.759711	1.15946	1.4864	1.65551
870	0.25788	0.24374	0.0999438	0.186153	0.301719	0.377116	1.42529	0.451	0.463	0.568	0.454	0.448	0.451	1.31627	1.21186	0.405054	0.943886	1.55035	1.92488	0.274805	0.192153	-0.903735	-0.05775	0.438481	0.654864	3.51964	2.98337	0.333296	1.80986	4.88275	7.52683	1.3697	1.31425	0.759815	1.15987	1.4865	1.65635
869.5	0.257908	0.244099	0.100094	0.186116	0.301631	0.376857	1.42611	0.451	0.463	0.568	0.454	0.448	0.451	1.31642	1.21364	0.405663	0.943698	1.5499	1.92356	0.274914	0.193625	-0.902233	-0.0579488	0.438189	0.654177	3.52445	2.99561	0.334683	1.81122	4.88552	7.52515	1.37016	1.31559	0.760604	1.16009	1.48671	1.65626
869	0.257858	0.243978	0.0999469	0.186103	0.301447	0.377231	1.42693	0.451	0.463	0.568	0.454	0.448	0.451	1.31616	1.21304	0.405066	0.943632	1.54895	1.92547	0.27472	0.193129	-0.903704	-0.0580186	0.437579	0.655169	3.52714	2.99608	0.334085	1.81305	4.88518	7.54877	1.37043	1.31564	0.760263	1.16039	1.48669	1.65756
868.5	0.257951	0.244052	0.100086	0.186128	0.302139	0.377219	1.42775	0.451	0.463	0.568	0.454	0.448	0.451	1.31664	1.21341	0.40563	0.943759	1.55251	1.92541	0.275081	0.193433	-0.902313	-0.0578843	0.439872	0.655137	3.53375	3.00135	0.335401	1.81562	4.91328	7.55698	1.37107	1.31622	0.761011	1.1608	1.48882	1.65801
868	0.257962	0.244179	0.100087	0.186092	0.301722	0.377517	1.42857	0.451	0.463	0.568	0.454	0.448	0.451	1.31669	1.21404	0.405634	0.943577	1.55037	1.92693	0.275123	0.193953	-0.902303	-0.0580777	0.438491	0.655927	3.53812	3.00794	0.335794	1.81701	4.90538	7.57765	1.37149	1.31694	0.761234	1.16102	1.48822	1.65914
867.5	0.257925	0.244239	0.100079	0.186154	0.301762	0.377292	1.42939	0.451	0.463	0.568	0.454	0.448	0.451	1.3165	1.21434	0.405602	0.943891	1.55057	1.92578	0.27498	0.194199	-0.902383	-0.0577446	0.438624	0.65533	3.54119	3.01289	0.336128	1.82032	4.91234	7.57735	1.37179	1.31749	0.761423	1.16155	1.48875	1.65913
867	0.25804	0.244326	0.100096	0.186293	0.301839	0.377452	1.43022	0.451	0.463	0.568	0.454	0.448	0.451	1.31709	1.21477	0.405671	0.944596	1.55097	1.9266	0.275426	0.194555	-0.902213	-0.0569982	0.438879	0.655754	3.54843	3.01851	0.33663	1.82514	4.92051	7.59252	1.37249	1.3181	0.761707	1.16232	1.48937	1.65996
866.5	0.258035	0.244447	0.100343	0.186189	0.301817	0.37756	1.43104	0.451	0.463	0.568	0.454	0.448	0.451	1.31707	1.21537	0.406672	0.944068	1.55085	1.92715	0.275406	0.19505	-0.899749	-0.0575566	0.438806	0.65604	3.55239	3.02499	0.338684	1.82521	4.92548	7.60564	1.37287	1.31881	0.762867	1.16233	1.48975	1.66067
866	0.257884	0.244499	0.100247	0.186311	0.301841	0.377486	1.43187	0.451	0.463	0.568	0.454	0.448	0.451	1.31629	1.21563	0.406283	0.944687	1.55098	1.92677	0.274821	0.195262	-0.900706	-0.0569016	0.438885	0.655844	3.55234	3.02978	0.338426	1.82972	4.93195	7.61144	1.37287	1.31933	0.762722	1.16304	1.49023	1.66099
865.5	0.258048	0.244768	0.100289	0.186281	0.302079	0.37751	1.4327	0.451	0.463	0.568	0.454	0.448	0.451	1.31713	1.21697	0.406453	0.944535	1.5522	1.92689	0.275457	0.196362	-0.900287	-0.0570626	0.439674	0.655908	3.56097	3.03996	0.339102	1.83124	4.94544	7.62121	1.3737	1.32043	0.763102	1.16329	1.49125	1.66152
865	0.258119	0.244471	0.100193	0.186314	0.302332	0.37804	1.43353	0.451	0.463	0.568	0.454	0.448	0.451	1.31749	1.21549	0.406064	0.944702	1.5535	1.9296	0.275732	0.195148	-0.901245	-0.0568855	0.440511	0.657311	3.56705	3.03609	0.338844	1.83401	4.95946	7.65146	1.37429	1.32001	0.762957	1.16372	1.49231	1.66317
864.5	0.258031	0.244484	0.100466	0.186439	0.302011	0.378042	1.43436	0.451	0.463	0.568	0.454	0.448	0.451	1.31705	1.21556	0.40717	0.945336	1.55185	1.92961	0.275391	0.195201	-0.898524	-0.0562148	0.439449	0.657316	3.56874	3.03993	0.341087	1.83859	4.95466	7.66039	1.37445	1.32043	0.764216	1.16445	1.49195	1.66365
864	0.258115	0.244569	0.100342	0.186294	0.302614	0.377923	1.43519	0.451	0.463	0.568	0.454	0.448	0.451	1.31747	1.21598	0.406668	0.944601	1.55495	1.929	0.275716	0.195549	-0.899759	-0.0569928	0.441443	0.657001	3.5752	3.04556	0.34064	1.83786	4.98022	7.66443	1.37507	1.32104	0.763966	1.16434	1.49387	1.66387
863.5	0.258151	0.244698	0.100515	0.186772	0.302433	0.377862	1.43602	0.451	0.463	0.568	0.454	0.448	0.451	1.31766	1.21662	0.407369	0.947025	1.55402	1.92869	0.275856	0.196076	-0.898036	-0.0544303	0.440845	0.65684	3.58034	3.05231	0.342211	1.84944	4.98003	7.67084	1.37556	1.32177	0.764845	1.16617	1.49385	1.66422
863	0.258173	0.244573	0.100413	0.186537	0.302511	0.378301	1.43685	0.451	0.463	0.568	0.454	0.448	0.451	1.31777	1.216	0.406956	0.945833	1.55442	1.93093	0.275941	0.195565	-0.899051	-0.0556893	0.441103	0.658001	3.5851	3.05272	0.341913	1.84693	4.98837	7.69758	1.37602	1.32182	0.764679	1.16577	1.49448	1.66567
862.5	0.258282	0.244799	0.100493	0.186478	0.302777	0.377942	1.43768	0.451	0.463	0.568	0.454	0.448	0.451	1.31833	1.21712	0.40728	0.945534	1.55579	1.9291	0.276363	0.196489	-0.898255	-0.0560056	0.441982	0.657052	3.59229	3.06191	0.342855	1.8479	5.00294	7.69189	1.37671	1.32281	0.765205	1.16592	1.49557	1.66536
862	0.258213	0.244996	0.100302	0.186526	0.302898	0.378085	1.43852	0.451	0.463	0.568	0.454	0.448	0.451	1.31797	1.2181	0.406506	0.945777	1.55641	1.92983	0.276096	0.197293	-0.900157	-0.0557482	0.442381	0.65743	3.59453	3.0704	0.34195	1.851	5.01275	7.70664	1.37693	1.32373	0.764699	1.16641	1.4963	1.66616
861.5	0.258311	0.244893	0.100386	0.186613	0.302754	0.378341	1.43935	0.451	0.463	0.568	0.454	0.448	0.451	1.31847	1.21759	0.406846	0.946218	1.55567	1.93113	0.276475	0.196873	-0.89932	-0.0552819	0.441906	0.658107	3.60144	3.07138	0.34292	1.85488	5.0138	7.72604	1.37759	1.32383	0.765241	1.16702	1.49638	1.66721
861	0.25825	0.244836	0.100515	0.186606	0.302895	0.378713	1.44019	0.451	0.463	0.568	0.454	0.448	0.451	1.31816	1.21731	0.407369	0.946183	1.55639	1.93303	0.276239	0.19664	-0.898036	-0.0553194	0.442371	0.65909	3.60392	3.07352	0.344202	1.85689	5.0243	7.75024	1.37782	1.32406	0.765955	1.16734	1.49716	1.66851
860.5	0.258274	0.244995	0.1007	0.186838	0.302821	0.378245	1.44102	0.451	0.463	0.568	0.454	0.448	0.451	1.31829	1.2181	0.408119	0.947359	1.55601	1.93064	0.276332	0.197289	-0.896197	-0.054077	0.442127	0.657853	3.60878	3.08109	0.345871	1.86368	5.02769	7.74008	1.37829	1.32488	0.766882	1.1684	1.49741	1.66796
860	0.25832	0.245189	0.100693	0.186883	0.302938	0.378526	1.44186	0.451	0.463	0.568	0.454	0.448	0.451	1.31852	1.21906	0.40809	0.947587	1.55661	1.93208	0.27651	0.198081	-0.896267	-0.0538361	0.442513	0.658596	3.61427	3.08956	0.346225	1.86674	5.03742	7.7606	1.37881	1.32579	0.767078	1.16888	1.49814	1.66907
859.5	0.258348	0.245282	0.100565	0.186779	0.302837	0.378472	1.4427	0.451	0.463	0.568	0.454	0.448	0.451	1.31866	1.21952	0.407572	0.94706	1.5561	1.9318	0.276618	0.19846	-0.897539	-0.0543928	0.44218	0.658453	3.61926	3.09551	0.345748	1.86684	5.03993	7.76742	1.37929	1.32643	0.766814	1.1689	1.49832	1.66943
859	0.25849	0.245241	0.100657	0.186838	0.30266	0.378825	1.44354	0.451	0.463	0.568	0.454	0.448	0.451	1.31939	1.21932	0.407944	0.947359	1.55519	1.9336	0.277168	0.198293	-0.896624	-0.054077	0.441595	0.659385	3.62746	3.09807	0.346784	1.87019	5.0399	7.79098	1.38007	1.3267	0.767388	1.16942	1.49832	1.6707
858.5	0.258467	0.245306	0.100693	0.186846	0.303038	0.378549	1.44438	0.451	0.463	0.568	0.454	0.448	0.451	1.31927	1.21964	0.40809	0.9474	1.55713	1.93219	0.277079	0.198558	-0.896267	-0.0540341	0.442843	0.658656	3.63104	3.10333	0.347436	1.87253	5.05838	7.78869	1.38041	1.32726	0.767748	1.16979	1.49969	1.67058
858	0.258475	0.245457	0.10071	0.186905	0.303024	0.378967	1.44522	0.451	0.463	0.568	0.454	0.448	0.451	1.31931	1.22039	0.408159	0.947699	1.55706	1.93433	0.27711	0.199173	-0.896098	-0.0537184	0.442797	0.65976	3.63549	3.11077	0.347959	1.8759	5.06381	7.815	1.38083	1.32806	0.768037	1.17031	1.5001	1.67198
857.5	0.258434	0.245463	0.100568	0.186851	0.303057	0.378732	1.44606	0.451	0.463	0.568	0.454	0.448	0.451	1.3191	1.22042	0.407584	0.947425	1.55723	1.93313	0.276951	0.199197	-0.897509	-0.0540074	0.442906	0.65914	3.63858	3.11455	0.347383	1.877	5.07082	7.81442	1.38113	1.32846	0.767719	1.17049	1.50062	1.67195
857	0.258376	0.245684	0.10075	0.186912	0.303266	0.378652	1.44691	0.451	0.463	0.568	0.454	0.448	0.451	1.31881	1.22152	0.408321	0.947734	1.5583	1.93272	0.276727	0.200097	-0.895701	-0.053681	0.443595	0.658929	3.64119	3.12381	0.349049	1.88042	5.08375	7.82023	1.38137	1.32945	0.768637	1.17102	1.50157	1.67226
856.5	0.258473	0.245446	0.100731	0.186969	0.303282	0.379203	1.44775	0.451	0.463	0.568	0.454	0.448	0.451	1.3193	1.22034	0.408244	0.948023	1.55838	1.93553	0.277102	0.199128	-0.89589	-0.0533761	0.443648	0.660383	3.64818	3.1214	0.349324	1.88377	5.09022	7.85217	1.38204	1.32919	0.768789	1.17154	1.50205	1.67397
856	0.258489	0.245602	0.100857	0.187097	0.303448	0.378998	1.4486	0.451	0.463	0.568	0.454	0.448	0.451	1.31938	1.22111	0.408755	0.948672	1.55924	1.93449	0.277164	0.199764	-0.894639	-0.0526917	0.444195	0.659842	3.6529	3.12902	0.350608	1.88855	5.10175	7.85285	1.38248	1.33	0.769494	1.17228	1.5029	1.67401
855.5	0.258598	0.245752	0.100889	0.187048	0.303249	0.379198	1.44944	0.451	0.463	0.568	0.454	0.448	0.451	1.31994	1.22186	0.408885	0.948424	1.55821	1.93551	0.277586	0.200374	-0.894322	-0.0529536	0.443539	0.660369	3.66025	3.13651	0.351241	1.88977	5.10102	7.87033	1.38318	1.3308	0.769841	1.17247	1.50284	1.67494
855	0.258725	0.245836	0.100892	0.187084	0.303599	0.379209	1.45029	0.451	0.463	0.568	0.454	0.448	0.451	1.32059	1.22228	0.408897	0.948607	1.56001	1.93556	0.278077	0.200716	-0.894292	-0.0527612	0.444693	0.660398	3.66814	3.14232	0.351673	1.89271	5.11878	7.88	1.38392	1.33141	0.770078	1.17293	1.50415	1.67545
854.5	0.258747	0.245819	0.100838	0.187206	0.303448	0.379507	1.45114	0.451	0.463	0.568	0.454	0.448	0.451	1.3207	1.22219	0.408678	0.949225	1.55924	1.93708	0.278162	0.200647	-0.894828	-0.0521093	0.444195	0.661184	3.67306	3.14557	0.351708	1.89739	5.11968	7.90162	1.38438	1.33176	0.770097	1.17365	1.50422	1.6766
854	0.258622	0.245911	0.100928	0.187116	0.303714	0.379321	1.45199	0.451	0.463	0.568	0.454	0.448	0.451	1.32006	1.22265	0.409043	0.948769	1.5606	1.93614	0.277679	0.201021	-0.893936	-0.0525901	0.445072	0.660694	3.67381	3.15161	0.352748	1.89779	5.13466	7.90313	1.38446	1.3324	0.770666	1.17371	1.50532	1.67668
853.5	0.258654	0.245851	0.100973	0.187226	0.303614	0.379569	1.45284	0.451	0.463	0.568	0.454	0.448	0.451	1.32023	1.22235	0.409225	0.949327	1.56009	1.9374	0.277802	0.200777	-0.89349	-0.0520024	0.444742	0.661347	3.67902	3.15376	0.353477	1.90225	5.1373	7.92274	1.38495	1.33262	0.771064	1.1744	1.50551	1.67772
853	0.258653	0.245928	0.100974	0.187312	0.303571	0.379307	1.45369	0.451	0.463	0.568	0.454	0.448	0.451	1.32022	1.22273	0.409229	0.949763	1.55987	1.93606	0.277798	0.20109	-0.89348	-0.0515432	0.444601	0.660657	3.68331	3.15944	0.353898	1.90623	5.14186	7.92108	1.38535	1.33322	0.771293	1.17502	1.50584	1.67763
852.5	0.258673	0.246244	0.100934	0.187271	0.303554	0.379741	1.45455	0.451	0.463	0.568	0.454	0.448	0.451	1.32032	1.22431	0.409067	0.949555	1.55978	1.93828	0.277876	0.202374	-0.893876	-0.0517621	0.444545	0.6618	3.6882	3.17128	0.354033	1.90763	5.14732	7.94854	1.38581	1.33447	0.771367	1.17523	1.50624	1.67908
852	0.258645	0.24607	0.101044	0.187465	0.303733	0.379753	1.4554	0.451	0.463	0.568	0.454	0.448	0.451	1.32018	1.22344	0.409513	0.950538	1.5607	1.93834	0.277767	0.201667	-0.892787	-0.0507267	0.445134	0.661832	3.69173	3.17052	0.355221	1.91383	5.15944	7.95837	1.38614	1.33439	0.772013	1.17619	1.50713	1.6796
851.5	0.258722	0.246083	0.101147	0.187232	0.303792	0.379776	1.45625	0.451	0.463	0.568	0.454	0.448	0.451	1.32057	1.22351	0.40993	0.949357	1.561	1.93846	0.278065	0.20172	-0.891768	-0.0519704	0.445328	0.661893	3.69827	3.17458	0.356364	1.91132	5.16751	7.96868	1.38675	1.33482	0.772633	1.1758	1.50772	1.68014
851	0.258863	0.246188	0.101121	0.187512	0.303868	0.379978	1.45711	0.451	0.463	0.568	0.454	0.448	0.451	1.32129	1.22403	0.409825	0.950777	1.56139	1.93949	0.27861	0.202147	-0.892025	-0.050476	0.445578	0.662424	3.70665	3.18102	0.3566	1.91929	5.17617	7.98654	1.38754	1.33549	0.772761	1.17702	1.50835	1.68109
850.5	0.25891	0.246342	0.101103	0.187531	0.303922	0.37974	1.45797	0.451	0.463	0.568	0.454	0.448	0.451	1.32153	1.22479	0.409752	0.950873	1.56167	1.93827	0.278791	0.202772	-0.892203	-0.0503747	0.445756	0.661798	3.71236	3.18875	0.356892	1.92194	5.1841	7.98592	1.38807	1.3363	0.772919	1.17743	1.50893	1.68105
850	0.306054	0.291216	0.175117	0.264987	0.368597	0.415415	1.45882	0.451	0.463	0.568	0.454	0.448	0.451	1.56216	1.4479	0.709717	1.34361	1.894	2.12037	0.446073	0.370117	-0.342889	0.295362	0.638689	0.751589	5.19349	4.46154	1.07195	3.84197	7.6342	9.56814	1.50961	1.45335	1.01752	1.40003	1.66223	1.75876
849.5	0.306048	0.291161	0.175268	0.264976	0.368808	0.4153	1.45968	0.451	0.463	0.568	0.454	0.448	0.451	1.56213	1.44763	0.710329	1.34356	1.89508	2.11978	0.446053	0.369928	-0.342027	0.29532	0.639261	0.751312	5.1994	4.4651	1.07507	3.84617	7.65195	9.5741	1.51004	1.45364	1.01826	1.40042	1.66319	1.75904
849	0.306068	0.29121	0.175399	0.264875	0.369273	0.415535	1.46054	0.451	0.463	0.568	0.454	0.448	0.451	1.56224	1.44787	0.71086	1.34304	1.89747	2.12098	0.446118	0.370096	-0.34128	0.294939	0.640521	0.751878	5.20621	4.47187	1.07794	3.84777	7.68029	9.59623	1.51053	1.45419	1.01894	1.40056	1.66473	1.76005
848.5	0.306225	0.291029	0.175206	0.265076	0.368731	0.415725	1.4614	0.451	0.463	0.568	0.454	0.448	0.451	1.56304	1.44697	0.710078	1.34406	1.89468	2.12195	0.446631	0.369474	-0.342381	0.295698	0.639052	0.752335	5.21769	4.47158	1.07684	3.85815	7.66679	9.61633	1.51137	1.45417	1.01868	1.40151	1.664	1.76097
848	0.306138	0.291372	0.17546	0.26466	0.368931	0.415543	1.46226	0.451	0.463	0.568	0.454	0.448	0.451	1.56259	1.44868	0.711107	1.34195	1.89571	2.12102	0.446347	0.370652	-0.340932	0.294127	0.639595	0.751897	5.22088	4.48741	1.08124	3.85059	7.68416	9.61925	1.5116	1.45546	1.01972	1.40082	1.66494	1.76111
847.5	0.306034	0.291039	0.175421	0.264981	0.369197	0.415671	1.46313	0.451	0.463	0.568	0.454	0.448	0.451	1.56206	1.44702	0.710949	1.34358	1.89708	2.12167	0.446007	0.369509	-0.341154	0.295339	0.640315	0.752205	5.22349	4.48245	1.08203	3.86449	7.70433	9.63654	1.51179	1.45505	1.01991	1.40208	1.66603	1.7619
847	0.306249	0.291194	0.175615	0.265145	0.368767	0.415477	1.46399	0.451	0.463	0.568	0.454	0.448	0.451	1.56316	1.44779	0.711735	1.34441	1.89487	2.12068	0.446709	0.370041	-0.340049	0.295958	0.63915	0.751738	5.23701	4.49252	1.08571	3.87385	7.69547	9.63891	1.51276	1.45587	1.02077	1.40293	1.66555	1.762
846.5	0.306345	0.291203	0.17559	0.26523	0.368974	0.415792	1.46486	0.451	0.463	0.568	0.454	0.448	0.451	1.56365	1.44784	0.711634	1.34484	1.89593	2.12229	0.447023	0.370072	-0.340191	0.296278	0.639711	0.752496	5.24649	4.49811	1.08668	3.88091	7.71322	9.66494	1.51345	1.45632	1.021	1.40357	1.66651	1.76319
846	0.306299	0.291336	0.175474	0.265207	0.369222	0.415811	1.46572	0.451	0.463	0.568	0.454	0.448	0.451	1.56342	1.4485	0.711164	1.34473	1.89721	2.12239	0.446873	0.370528	-0.340852	0.296192	0.640383	0.752542	5.25111	4.50754	1.08653	3.88483	7.73272	9.67725	1.51378	1.45709	1.02096	1.40392	1.66757	1.76375
845.5	0.306399	0.291299	0.175678	0.26507	0.368825	0.415631	1.46659	0.451	0.463	0.568	0.454	0.448	0.451	1.56393	1.44832	0.711991	1.34403	1.89517	2.12147	0.447199	0.370401	-0.33969	0.295675	0.639307	0.752109	5.26076	4.51173	1.09035	3.8854	7.72523	9.68032	1.51447	1.45742	1.02186	1.40397	1.66716	1.76389
845	0.306361	0.291326	0.175572	0.265251	0.368794	0.415879	1.46746	0.451	0.463	0.568	0.454	0.448	0.451	1.56373	1.44845	0.711561	1.34495	1.89501	2.12273	0.447075	0.370494	-0.340294	0.296358	0.639223	0.752705	5.26568	4.51791	1.09032	3.89532	7.73308	9.70335	1.51483	1.45792	1.02185	1.40487	1.66759	1.76494
844.5	0.306307	0.291406	0.175536	0.265136	0.369072	0.415826	1.46832	0.451	0.463	0.568	0.454	0.448	0.451	1.56346	1.44885	0.711415	1.34437	1.89644	2.12246	0.446899	0.370769	-0.340499	0.295924	0.639977	0.752578	5.27006	4.52574	1.09116	3.89655	7.75391	9.71236	1.51514	1.45855	1.02205	1.40498	1.66871	1.76535
844	0.306263	0.291302	0.175543	0.265209	0.368838	0.416084	1.46919	0.451	0.463	0.568	0.454	0.448	0.451	1.56323	1.44833	0.711444	1.34474	1.89523	2.12378	0.446755	0.370412	-0.340459	0.296199	0.639343	0.753198	5.27479	4.52787	1.09255	3.90332	7.75326	9.73594	1.51548	1.45873	1.02237	1.40559	1.66867	1.76642
843.5	0.306352	0.291311	0.17562	0.265136	0.368931	0.416223	1.47007	0.451	0.463	0.568	0.454	0.448	0.451	1.56369	1.44838	0.711756	1.34437	1.89571	2.12449	0.447046	0.370443	-0.340021	0.295924	0.639595	0.753532	5.28411	4.53352	1.0948	3.9058	7.76637	9.754	1.51615	1.45918	1.0229	1.40581	1.66938	1.76724
843	0.306351	0.291686	0.175608	0.265194	0.368831	0.416072	1.47094	0.451	0.463	0.568	0.454	0.448	0.451	1.56368	1.45024	0.711707	1.34466	1.8952	2.12372	0.447042	0.371729	-0.340089	0.296143	0.639324	0.753169	5.29035	4.55059	1.09595	3.91214	7.77137	9.75849	1.5166	1.46055	1.02317	1.40638	1.66965	1.76744
842.5	0.306398	0.291387	0.175634	0.265326	0.368713	0.416137	1.47181	0.451	0.463	0.568	0.454	0.448	0.451	1.56392	1.44875	0.711812	1.34533	1.89459	2.12405	0.447196	0.370704	-0.339941	0.29664	0.639004	0.753326	5.29826	4.54666	1.09758	3.92069	7.77562	9.77313	1.51717	1.46024	1.02355	1.40715	1.66987	1.76811
842	0.306426	0.29117	0.175865	0.265155	0.368839	0.4161	1.47268	0.451	0.463	0.568	0.454	0.448	0.451	1.56406	1.44767	0.712749	1.34446	1.89524	2.12386	0.447287	0.369959	-0.338626	0.295996	0.639345	0.753237	5.30552	4.54528	1.10177	3.92029	7.79018	9.783	1.51769	1.46013	1.02453	1.40711	1.67066	1.76855
841.5	0.306381	0.291464	0.175859	0.265339	0.3688	0.416011	1.47356	0.451	0.463	0.568	0.454	0.448	0.451	1.56383	1.44914	0.712724	1.3454	1.89504	2.12341	0.44714	0.370968	-0.338661	0.296689	0.63924	0.753023	5.31027	4.55988	1.10301	3.9304	7.79779	9.79044	1.51803	1.4613	1.02481	1.40802	1.67106	1.76889
841	0.306504	0.291651	0.175687	0.265315	0.368828	0.416145	1.47444	0.451	0.463	0.568	0.454	0.448	0.451	1.56446	1.45007	0.712027	1.34528	1.89518	2.12409	0.447542	0.371609	-0.339639	0.296599	0.639315	0.753345	5.32085	4.57117	1.10216	3.93436	7.80825	9.8084	1.51878	1.4622	1.02462	1.40838	1.67162	1.7697
840.5	0.306386	0.291554	0.175718	0.265066	0.368735	0.416143	1.47531	0.451	0.463	0.568	0.454	0.448	0.451	1.56386	1.44958	0.712153	1.34401	1.89471	2.12408	0.447157	0.371276	-0.339463	0.29566	0.639063	0.75334	5.32308	4.57356	1.10386	3.93165	7.8136	9.81998	1.51894	1.46239	1.02501	1.40813	1.67191	1.77022
840	0.306389	0.291396	0.175617	0.265437	0.368973	0.416466	1.47619	0.451	0.463	0.568	0.454	0.448	0.451	1.56387	1.4488	0.711744	1.34589	1.89593	2.12573	0.447167	0.370734	-0.340038	0.297059	0.639709	0.754116	5.32953	4.57405	1.10391	3.94736	7.83301	9.84694	1.5194	1.46243	1.02502	1.40954	1.67295	1.77144
839.5	0.306441	0.291482	0.175472	0.265412	0.368841	0.416223	1.47707	0.451	0.463	0.568	0.454	0.448	0.451	1.56414	1.44923	0.711156	1.34577	1.89525	2.12449	0.447336	0.37103	-0.340864	0.296964	0.639351	0.753532	5.33769	4.5822	1.1034	3.95132	7.83673	9.84718	1.51998	1.46308	1.0249	1.40989	1.67315	1.77145
839	0.306344	0.291436	0.175723	0.265533	0.368817	0.416429	1.47795	0.451	0.463	0.568	0.454	0.448	0.451	1.56364	1.449	0.712173	1.34638	1.89513	2.12554	0.44702	0.370872	-0.339434	0.29742	0.639286	0.754027	5.34067	4.58622	1.10787	3.95964	7.84505	9.86868	1.52019	1.4634	1.02594	1.41063	1.67359	1.77241
838.5	0.306407	0.291531	0.175659	0.265635	0.369026	0.416341	1.47883	0.451	0.463	0.568	0.454	0.448	0.451	1.56397	1.44947	0.711914	1.3469	1.8962	2.12509	0.447225	0.371198	-0.339798	0.297804	0.639852	0.753816	5.34924	4.59468	1.10839	3.96741	7.86332	9.87627	1.5208	1.46408	1.02606	1.41132	1.67456	1.77275
838	0.306432	0.291645	0.175703	0.265292	0.369134	0.416534	1.47971	0.451	0.463	0.568	0.454	0.448	0.451	1.56409	1.45004	0.712092	1.34516	1.89676	2.12608	0.447307	0.371589	-0.339548	0.296512	0.640145	0.754279	5.3565	4.60376	1.11027	3.96189	7.87731	9.89723	1.52132	1.4648	1.0265	1.41083	1.67531	1.77369
837.5	0.306487	0.291531	0.175513	0.26547	0.369017	0.416473	1.4806	0.451	0.463	0.568	0.454	0.448	0.451	1.56437	1.44947	0.711322	1.34606	1.89615	2.12577	0.447486	0.371198	-0.34063	0.297183	0.639828	0.754133	5.36482	4.60566	1.10919	3.97195	7.88172	9.90615	1.52191	1.46495	1.02625	1.41173	1.67554	1.77409
837	0.306553	0.291754	0.175817	0.265691	0.368792	0.416674	1.48148	0.451	0.463	0.568	0.454	0.448	0.451	1.56471	1.45058	0.712554	1.34718	1.895	2.12679	0.447702	0.371962	-0.338899	0.298015	0.639218	0.754615	5.37355	4.61822	1.11437	3.98332	7.88152	9.92757	1.52253	1.46595	1.02744	1.41274	1.67553	1.77505
836.5	0.306511	0.291427	0.175699	0.265457	0.368825	0.416381	1.48237	0.451	0.463	0.568	0.454	0.448	0.451	1.5645	1.44895	0.712076	1.346	1.89517	2.1253	0.447565	0.370841	-0.339571	0.297134	0.639307	0.753912	5.3785	4.61339	1.1142	3.98106	7.89236	9.92546	1.52288	1.46556	1.0274	1.41254	1.67611	1.77496
836	0.306527	0.291747	0.175669	0.265699	0.368908	0.416673	1.48325	0.451	0.463	0.568	0.454	0.448	0.451	1.56458	1.45054	0.711954	1.34722	1.89559	2.12679	0.447617	0.371938	-0.339742	0.298045	0.639532	0.754613	5.3855	4.62905	1.11515	3.99309	7.90536	9.95128	1.52337	1.46681	1.02762	1.4136	1.6768	1.77611
835.5	0.306437	0.29155	0.175686	0.265632	0.368872	0.416841	1.48414	0.451	0.463	0.568	0.454	0.448	0.451	1.56412	1.44956	0.712023	1.34688	1.89541	2.12765	0.447323	0.371263	-0.339645	0.297793	0.639435	0.755016	5.38878	4.62834	1.11671	3.99586	7.91328	9.97123	1.52361	1.46675	1.02798	1.41385	1.67722	1.777
835	0.306596	0.291602	0.175677	0.265741	0.369082	0.41654	1.48503	0.451	0.463	0.568	0.454	0.448	0.451	1.56493	1.44982	0.711987	1.34744	1.89649	2.12611	0.447842	0.371441	-0.339696	0.298203	0.640004	0.754293	5.40084	4.63554	1.11793	4.00393	7.93178	9.96877	1.52446	1.46732	1.02826	1.41456	1.6782	1.77689
834.5	0.306646	0.291326	0.175356	0.265761	0.369036	0.416693	1.48592	0.451	0.463	0.568	0.454	0.448	0.451	1.56519	1.44845	0.710686	1.34754	1.89625	2.12689	0.448005	0.370494	-0.341525	0.298279	0.639879	0.754661	5.40907	4.63231	1.11518	4.00933	7.93931	9.98805	1.52504	1.46707	1.02763	1.41504	1.67859	1.77775
834	0.30657	0.291623	0.17563	0.26598	0.369041	0.416961	1.48681	0.451	0.463	0.568	0.454	0.448	0.451	1.5648	1.44993	0.711796	1.34865	1.89628	2.12826	0.447757	0.371513	-0.339964	0.299102	0.639893	0.755304	5.41288	4.64733	1.12001	4.02076	7.94905	10.0129	1.52531	1.46825	1.02874	1.41604	1.67911	1.77885
833.5	0.306523	0.291483	0.175746	0.265975	0.369	0.41687	1.4877	0.451	0.463	0.568	0.454	0.448	0.451	1.56456	1.44923	0.712266	1.34862	1.89607	2.12779	0.447604	0.371033	-0.339303	0.299083	0.639782	0.755085	5.41771	4.64844	1.12284	4.02543	7.95682	10.0205	1.52565	1.46834	1.02939	1.41646	1.67952	1.77919
833	0.306606	0.291475	0.175542	0.265725	0.36903	0.416793	1.4886	0.451	0.463	0.568	0.454	0.448	0.451	1.56498	1.44919	0.71144	1.34735	1.89622	2.1274	0.447875	0.371005	-0.340465	0.298143	0.639863	0.754901	5.42715	4.65377	1.12158	4.0227	7.96767	10.0289	1.52631	1.46876	1.0291	1.41622	1.68009	1.77956
832.5	0.306623	0.291497	0.175465	0.265895	0.368895	0.416862	1.48949	0.451	0.463	0.568	0.454	0.448	0.451	1.56507	1.4493	0.711128	1.34822	1.89553	2.12775	0.44793	0.371081	-0.340904	0.298783	0.639497	0.755066	5.43428	4.66006	1.12194	4.03268	7.97141	10.0442	1.52681	1.46926	1.02918	1.41709	1.68029	1.78024
832	0.306586	0.291563	0.17555	0.266146	0.36884	0.41677	1.49038	0.451	0.463	0.568	0.454	0.448	0.451	1.56488	1.44963	0.711472	1.34949	1.89524	2.12728	0.447809	0.371307	-0.340419	0.299726	0.639348	0.754845	5.4395	4.66778	1.12438	4.04516	7.97861	10.0519	1.52718	1.46987	1.02974	1.41819	1.68067	1.78058
831.5	0.306469	0.291532	0.175475	0.265987	0.369003	0.416952	1.49128	0.451	0.463	0.568	0.454	0.448	0.451	1.56428	1.44947	0.711168	1.34868	1.89608	2.12821	0.447428	0.371201	-0.340847	0.299129	0.63979	0.755282	5.44189	4.6724	1.12477	4.04519	7.99527	10.0728	1.52735	1.47023	1.02983	1.41819	1.68154	1.78151
831	0.306537	0.291415	0.175552	0.26618	0.369222	0.417104	1.49218	0.451	0.463	0.568	0.454	0.448	0.451	1.56463	1.44889	0.71148	1.34966	1.89721	2.12899	0.447649	0.3708	-0.340408	0.299854	0.640383	0.755647	5.45086	4.67427	1.12711	4.05594	8.0144	10.0922	1.52797	1.47038	1.03037	1.41913	1.68255	1.78237
830.5	0.306541	0.291716	0.175426	0.266273	0.368906	0.416963	1.49308	0.451	0.463	0.568	0.454	0.448	0.451	1.56465	1.45039	0.710969	1.35013	1.89558	2.12827	0.447662	0.371832	-0.341126	0.300203	0.639527	0.755308	5.45756	4.68957	1.12685	4.06366	8.01033	10.0976	1.52844	1.47158	1.03031	1.41981	1.68234	1.7826
830	0.306558	0.291795	0.175429	0.266036	0.368867	0.417101	1.49398	0.451	0.463	0.568	0.454	0.448	0.451	1.56474	1.45078	0.710982	1.34893	1.89538	2.12897	0.447718	0.372103	-0.341109	0.299313	0.639421	0.755639	5.46475	4.69777	1.12825	4.06132	8.01828	10.1164	1.52895	1.47222	1.03063	1.4196	1.68275	1.78343
829.5	0.306509	0.29157	0.17551	0.266393	0.368811	0.417173	1.49488	0.451	0.463	0.568	0.454	0.448	0.451	1.56449	1.44966	0.71131	1.35074	1.8951	2.12934	0.447558	0.371331	-0.340647	0.300654	0.639269	0.755812	5.46959	4.69618	1.13065	4.07714	8.02552	10.1321	1.52929	1.4721	1.03117	1.42098	1.68313	1.78412
829	0.306408	0.291373	0.175311	0.26631	0.368845	0.41718	1.49578	0.451	0.463	0.568	0.454	0.448	0.451	1.56397	1.44868	0.710503	1.35032	1.89527	2.12938	0.447229	0.370655	-0.341782	0.300342	0.639362	0.755829	5.47258	4.6955	1.12945	4.07951	8.03668	10.1447	1.52949	1.47204	1.0309	1.42119	1.68372	1.78468
828.5	0.306415	0.291464	0.175099	0.266261	0.368752	0.417131	1.49668	0.451	0.463	0.568	0.454	0.448	0.451	1.56401	1.44914	0.709644	1.35007	1.89479	2.12913	0.447251	0.370968	-0.342992	0.300158	0.639109	0.755711	5.47944	4.7041	1.12808	4.08293	8.04233	10.1546	1.52997	1.47272	1.03059	1.42149	1.68401	1.78511
828	0.306473	0.291291	0.175346	0.266259	0.368782	0.416931	1.49758	0.451	0.463	0.568	0.454	0.448	0.451	1.5643	1.44828	0.710645	1.35006	1.89495	2.1281	0.447441	0.370374	-0.341582	0.300151	0.639191	0.755232	5.48813	4.7042	1.13263	4.08781	8.05335	10.1571	1.53058	1.47272	1.03163	1.42191	1.68459	1.78522
827.5	0.306413	0.29129	0.175284	0.266427	0.368698	0.417327	1.49849	0.451	0.463	0.568	0.454	0.448	0.451	1.564	1.44827	0.710394	1.35091	1.89452	2.13013	0.447245	0.370371	-0.341936	0.300781	0.638963	0.756181	5.49262	4.70985	1.1332	4.09791	8.05942	10.1887	1.53089	1.47317	1.03175	1.42279	1.68491	1.78661
827	0.306363	0.291361	0.175156	0.266139	0.368527	0.41701	1.4994	0.451	0.463	0.568	0.454	0.448	0.451	1.56374	1.44862	0.709875	1.34945	1.89364	2.12851	0.447082	0.370614	-0.342666	0.2997	0.638499	0.755421	5.49747	4.71785	1.13291	4.094	8.06168	10.1855	1.53123	1.47379	1.03169	1.42245	1.68503	1.78647
826.5	0.306394	0.291358	0.175334	0.266346	0.368558	0.417104	1.5003	0.451	0.463	0.568	0.454	0.448	0.451	1.5639	1.44861	0.710597	1.3505	1.8938	2.12899	0.447183	0.370604	-0.34165	0.300477	0.638583	0.755647	5.50523	4.72346	1.13659	4.10534	8.0728	10.2024	1.53177	1.47423	1.03253	1.42343	1.68561	1.78721
826	0.306427	0.291464	0.175285	0.266549	0.36881	0.417059	1.50121	0.451	0.463	0.568	0.454	0.448	0.451	1.56407	1.44914	0.710398	1.35153	1.89509	2.12876	0.447291	0.370968	-0.34193	0.301239	0.639267	0.755539	5.51309	4.73262	1.13733	4.11658	8.09363	10.2126	1.53232	1.47494	1.03269	1.42441	1.68669	1.78766
825.5	0.306474	0.291368	0.175071	0.266552	0.368716	0.417333	1.50212	0.451	0.463	0.568	0.454	0.448	0.451	1.56431	1.44866	0.709531	1.35155	1.89461	2.13016	0.447444	0.370638	-0.343152	0.30125	0.639012	0.756195	5.52146	4.73524	1.13593	4.12166	8.09931	10.2384	1.5329	1.47515	1.03238	1.42485	1.68699	1.78878
825	0.306373	0.2914	0.175052	0.266627	0.368434	0.417517	1.50303	0.451	0.463	0.568	0.454	0.448	0.451	1.56379	1.44882	0.709454	1.35193	1.89316	2.1311	0.447114	0.370748	-0.34326	0.301532	0.638247	0.756636	5.52451	4.74202	1.13706	4.12898	8.09673	10.2599	1.53311	1.47568	1.03263	1.42548	1.68685	1.78972
824.5	0.306358	0.291199	0.175068	0.266638	0.368802	0.417379	1.50394	0.451	0.463	0.568	0.454	0.448	0.451	1.56372	1.44782	0.709519	1.35198	1.89505	2.13039	0.447065	0.370058	-0.343169	0.301573	0.639245	0.756306	5.53067	4.74122	1.13865	4.13433	8.12275	10.2655	1.53354	1.47561	1.03299	1.42594	1.68821	1.78997
824	0.306484	0.291516	0.175006	0.266815	0.368537	0.417477	1.50485	0.451	0.463	0.568	0.454	0.448	0.451	1.56436	1.44939	0.709267	1.35288	1.89369	2.13089	0.447477	0.371146	-0.343523	0.302237	0.638526	0.75654	5.54194	4.75732	1.13922	4.14485	8.12093	10.2828	1.53432	1.47686	1.03312	1.42685	1.68811	1.79072
823.5	0.306396	0.291462	0.175101	0.266706	0.368451	0.417297	1.50577	0.451	0.463	0.568	0.454	0.448	0.451	1.56391	1.44913	0.709652	1.35233	1.89325	2.12997	0.447189	0.370961	-0.34298	0.301828	0.638293	0.756109	5.54549	4.76133	1.14185	4.14649	8.127	10.2864	1.53456	1.47718	1.03372	1.42699	1.68843	1.79088
823	0.30632	0.291539	0.17491	0.266983	0.368584	0.41768	1.50668	0.451	0.463	0.568	0.454	0.448	0.451	1.56352	1.44951	0.708878	1.35373	1.89393	2.13193	0.446941	0.371225	-0.344072	0.302866	0.638654	0.757027	5.54948	4.76964	1.14074	4.16016	8.14275	10.3178	1.53484	1.47782	1.03347	1.42816	1.68925	1.79224
822.5	0.306469	0.291353	0.174799	0.266665	0.368614	0.417496	1.5076	0.451	0.463	0.568	0.454	0.448	0.451	1.56428	1.44858	0.708428	1.35212	1.89408	2.13099	0.447428	0.370587	-0.344706	0.301674	0.638735	0.756586	5.56163	4.76935	1.14068	4.1553	8.15398	10.3213	1.53568	1.4778	1.03345	1.42774	1.68983	1.79239
822	0.306461	0.291388	0.174771	0.267034	0.368496	0.41754	1.50852	0.451	0.463	0.568	0.454	0.448	0.451	1.56424	1.44876	0.708315	1.35399	1.89348	2.13121	0.447401	0.370707	-0.344867	0.303057	0.638415	0.756691	5.56811	4.7763	1.1417	4.17188	8.15868	10.336	1.53613	1.47834	1.03368	1.42917	1.69007	1.79303
821.5	0.306418	0.291124	0.174878	0.266935	0.368247	0.417703	1.50943	0.451	0.463	0.568	0.454	0.448	0.451	1.56402	1.44745	0.708749	1.35349	1.8922	2.13205	0.447261	0.369801	-0.344255	0.302686	0.637739	0.757082	5.57332	4.77346	1.14449	4.17386	8.15758	10.3567	1.53649	1.47812	1.03432	1.42934	1.69001	1.79393
821	0.306367	0.291408	0.174965	0.267018	0.36822	0.417594	1.51035	0.451	0.463	0.568	0.454	0.448	0.451	1.56376	1.44886	0.709101	1.35391	1.89206	2.13149	0.447095	0.370776	-0.343757	0.302997	0.637666	0.756821	5.57826	4.7886	1.14703	4.18155	8.16632	10.3639	1.53683	1.47929	1.03489	1.42999	1.69047	1.79424
820.5	0.306271	0.291479	0.174606	0.26703	0.368443	0.417508	1.51127	0.451	0.463	0.568	0.454	0.448	0.451	1.56327	1.44921	0.707646	1.35397	1.8932	2.13105	0.446781	0.371019	-0.345811	0.303042	0.638271	0.756615	5.58156	4.79678	1.14372	4.18702	8.18618	10.3723	1.53705	1.47992	1.03414	1.43046	1.69149	1.7946
820	0.306288	0.291337	0.174538	0.267133	0.368427	0.417467	1.5122	0.451	0.463	0.568	0.454	0.448	0.451	1.56336	1.4485	0.707371	1.35449	1.89312	2.13084	0.446837	0.370532	-0.346201	0.303428	0.638228	0.756516	5.58899	4.79795	1.14422	4.19536	8.19546	10.3829	1.53756	1.48001	1.03425	1.43117	1.69197	1.79506
819.5	0.306353	0.29136	0.17458	0.267292	0.36851	0.417488	1.51312	0.451	0.463	0.568	0.454	0.448	0.451	1.56369	1.44862	0.707541	1.3553	1.89355	2.13095	0.447049	0.370611	-0.34596	0.304023	0.638453	0.756567	5.59819	4.80456	1.14617	4.20549	8.20916	10.3966	1.5382	1.48052	1.03469	1.43204	1.69268	1.79565
819	0.306259	0.29119	0.17483	0.267269	0.368294	0.417261	1.51404	0.451	0.463	0.568	0.454	0.448	0.451	1.56321	1.44777	0.708554	1.35518	1.89244	2.12979	0.446742	0.370027	-0.344529	0.303937	0.637867	0.756023	5.60158	4.80482	1.15086	4.2099	8.20955	10.398	1.53843	1.48054	1.03575	1.43241	1.6927	1.79571
818.5	0.306362	0.291238	0.174608	0.267162	0.368384	0.417585	1.51497	0.451	0.463	0.568	0.454	0.448	0.451	1.56374	1.44801	0.707654	1.35464	1.8929	2.13144	0.447078	0.370192	-0.3458	0.303536	0.638111	0.756799	5.6122	4.81228	1.14934	4.21167	8.2236	10.4269	1.53916	1.48111	1.03541	1.43256	1.69342	1.79696
818	0.306392	0.291049	0.174386	0.267537	0.368176	0.417637	1.51589	0.451	0.463	0.568	0.454	0.448	0.451	1.56389	1.44707	0.706755	1.35654	1.89183	2.13171	0.447176	0.369543	-0.347072	0.304939	0.637546	0.756924	5.62017	4.81191	1.14782	4.22867	8.22436	10.4422	1.5397	1.48108	1.03507	1.43401	1.69346	1.79762
817.5	0.306387	0.291226	0.174711	0.267521	0.368295	0.417554	1.51682	0.451	0.463	0.568	0.454	0.448	0.451	1.56386	1.44795	0.708072	1.35646	1.89244	2.13128	0.44716	0.370151	-0.34521	0.304879	0.637869	0.756725	5.62686	4.82366	1.15351	4.23333	8.23975	10.4508	1.54016	1.48199	1.03635	1.4344	1.69425	1.79799
817	0.306247	0.29107	0.174519	0.267424	0.368309	0.417789	1.51775	0.451	0.463	0.568	0.454	0.448	0.451	1.56315	1.44718	0.707294	1.35597	1.89252	2.13248	0.446703	0.369615	-0.346309	0.304517	0.637907	0.757287	5.6286	4.82439	1.15239	4.23544	8.25047	10.4754	1.54028	1.48204	1.0361	1.43458	1.6948	1.79905
816.5	0.306166	0.291226	0.174541	0.267398	0.368133	0.417862	1.51868	0.451	0.463	0.568	0.454	0.448	0.451	1.56274	1.44795	0.707383	1.35584	1.89161	2.13286	0.446438	0.370151	-0.346183	0.304419	0.637429	0.757462	5.63252	4.83548	1.15409	4.23981	8.25268	10.4919	1.54055	1.48289	1.03648	1.43495	1.69492	1.79976
816	0.306243	0.29116	0.174369	0.267489	0.36781	0.417669	1.51961	0.451	0.463	0.568	0.454	0.448	0.451	1.56313	1.44762	0.706686	1.3563	1.88995	2.13187	0.44669	0.369924	-0.347169	0.30476	0.636552	0.757	5.64226	4.83922	1.15323	4.2479	8.24831	10.4951	1.54122	1.48318	1.03628	1.43563	1.69469	1.79989
815.5	0.30624	0.290979	0.174416	0.267593	0.367848	0.41755	1.52054	0.451	0.463	0.568	0.454	0.448	0.451	1.56311	1.44672	0.706876	1.35683	1.89015	2.13126	0.44668	0.369302	-0.3469	0.305148	0.636655	0.756715	5.64907	4.83913	1.15527	4.25641	8.26013	10.502	1.54168	1.48317	1.03674	1.43635	1.6953	1.80019
815	0.306248	0.290973	0.174343	0.267683	0.3682	0.417914	1.52147	0.451	0.463	0.568	0.454	0.448	0.451	1.56315	1.4467	0.70658	1.35728	1.89196	2.13312	0.446706	0.369282	-0.347318	0.305485	0.637611	0.757587	5.6563	4.84487	1.15572	4.26451	8.2861	10.5332	1.54217	1.48361	1.03684	1.43703	1.69663	1.80152
814.5	0.306157	0.290876	0.174256	0.267531	0.367972	0.417672	1.52241	0.451	0.463	0.568	0.454	0.448	0.451	1.56269	1.44621	0.706228	1.35651	1.89078	2.13189	0.446409	0.368948	-0.347818	0.304917	0.636992	0.757007	5.65988	4.84759	1.15598	4.2649	8.28601	10.5339	1.54242	1.48382	1.0369	1.43707	1.69663	1.80155
814	0.306196	0.291183	0.17429	0.267705	0.367859	0.417823	1.52334	0.451	0.463	0.568	0.454	0.448	0.451	1.56289	1.44774	0.706365	1.35739	1.8902	2.13266	0.446536	0.370003	-0.347623	0.305567	0.636685	0.757369	5.66828	4.86379	1.15785	4.27569	8.2911	10.5545	1.54299	1.48506	1.03732	1.43798	1.69689	1.80243
813.5	0.306156	0.290911	0.174287	0.267547	0.367953	0.417831	1.52428	0.451	0.463	0.568	0.454	0.448	0.451	1.56269	1.44639	0.706353	1.35659	1.89069	2.1327	0.446406	0.369069	-0.34764	0.304976	0.63694	0.757388	5.67377	4.86068	1.15924	4.2759	8.30553	10.5679	1.54336	1.48482	1.03763	1.43799	1.69763	1.803
813	0.306185	0.291067	0.174163	0.267773	0.367744	0.417612	1.52522	0.451	0.463	0.568	0.454	0.448	0.451	1.56283	1.44716	0.705851	1.35774	1.88961	2.13158	0.4465	0.369605	-0.348351	0.305821	0.636372	0.756864	5.68182	4.87188	1.15901	4.28839	8.30631	10.5698	1.54391	1.48568	1.03758	1.43904	1.69767	1.80309
812.5	0.306258	0.290745	0.174066	0.267901	0.367752	0.417822	1.52615	0.451	0.463	0.568	0.454	0.448	0.451	1.56321	1.44556	0.705458	1.35839	1.88965	2.13265	0.446739	0.368498	-0.348909	0.306299	0.636394	0.757366	5.69153	4.86709	1.15915	4.29778	8.3169	10.5934	1.54457	1.48531	1.03761	1.43983	1.69821	1.80409
812	0.306205	0.290953	0.173978	0.26794	0.367609	0.417845	1.52709	0.451	0.463	0.568	0.454	0.448	0.451	1.56294	1.4466	0.705101	1.35859	1.88892	2.13277	0.446566	0.369213	-0.349414	0.306444	0.636005	0.757422	5.69657	4.88007	1.1594	4.30433	8.32067	10.6077	1.54491	1.4863	1.03767	1.44038	1.6984	1.8047
811.5	0.306219	0.290897	0.173918	0.268007	0.367574	0.417887	1.52803	0.451	0.463	0.568	0.454	0.448	0.451	1.56301	1.44632	0.704858	1.35893	1.88874	2.13298	0.446612	0.369021	-0.349759	0.306694	0.63591	0.757522	5.70411	4.8842	1.16003	4.31179	8.32934	10.6229	1.54542	1.48661	1.03781	1.441	1.69884	1.80535
811	0.306207	0.290843	0.173947	0.267754	0.367529	0.41802	1.52898	0.451	0.463	0.568	0.454	0.448	0.451	1.56295	1.44605	0.704975	1.35764	1.88851	2.13366	0.446572	0.368835	-0.349592	0.30575	0.635787	0.75784	5.7107	4.88841	1.16185	4.30896	8.33757	10.6427	1.54587	1.48693	1.03822	1.44076	1.69926	1.80619
810.5	0.306128	0.291111	0.173768	0.267738	0.367496	0.417809	1.52992	0.451	0.463	0.568	0.454	0.448	0.451	1.56254	1.44738	0.70425	1.35756	1.88834	2.13259	0.446314	0.369756	-0.350622	0.30569	0.635698	0.757335	5.7148	4.90347	1.16089	4.31376	8.34636	10.6451	1.54615	1.48808	1.038	1.44117	1.69971	1.80629
810	0.306122	0.290771	0.173716	0.26799	0.367667	0.417943	1.53086	0.451	0.463	0.568	0.454	0.448	0.451	1.56251	1.44569	0.704039	1.35884	1.88922	2.13327	0.446295	0.368587	-0.350921	0.306631	0.636163	0.757656	5.72163	4.89806	1.16163	4.32722	8.36445	10.6651	1.54661	1.48767	1.03817	1.44229	1.70063	1.80714
809.5	0.306136	0.291038	0.173649	0.268065	0.367616	0.417813	1.53181	0.451	0.463	0.568	0.454	0.448	0.451	1.56258	1.44702	0.703768	1.35922	1.88896	2.13261	0.44634	0.369505	-0.351307	0.306911	0.636024	0.757345	5.72923	4.91312	1.16217	4.335	8.37246	10.6716	1.54712	1.48881	1.03829	1.44294	1.70104	1.80741
809	0.306156	0.290973	0.173604	0.268165	0.367443	0.417934	1.53276	0.451	0.463	0.568	0.454	0.448	0.451	1.56269	1.4467	0.703585	1.35973	1.88807	2.13322	0.446406	0.369282	-0.351566	0.307284	0.635553	0.757634	5.73706	4.917	1.163	4.3436	8.37492	10.691	1.54765	1.4891	1.03847	1.44365	1.70116	1.80823
808.5	0.306073	0.290857	0.173663	0.268215	0.367678	0.417736	1.5337	0.451	0.463	0.568	0.454	0.448	0.451	1.56226	1.44612	0.703824	1.35998	1.88927	2.13221	0.446135	0.368883	-0.351226	0.30747	0.636193	0.757161	5.74104	4.91916	1.16523	4.35059	8.39602	10.6941	1.54792	1.48927	1.03897	1.44423	1.70223	1.80837
808	0.306081	0.290784	0.173361	0.268269	0.367473	0.418039	1.53465	0.451	0.463	0.568	0.454	0.448	0.451	1.5623	1.44576	0.7026	1.36025	1.88822	2.13376	0.446161	0.368632	-0.352967	0.307671	0.635635	0.757886	5.74845	4.92278	1.16262	4.35773	8.39704	10.7229	1.54842	1.48954	1.03839	1.44482	1.70228	1.80958
807.5	0.306034	0.290831	0.173507	0.2684	0.367337	0.417976	1.5356	0.451	0.463	0.568	0.454	0.448	0.451	1.56206	1.44599	0.703192	1.36092	1.88752	2.13344	0.446007	0.368794	-0.352125	0.30816	0.635265	0.757735	5.75381	4.93047	1.16602	4.36739	8.40122	10.7329	1.54878	1.49012	1.03915	1.44562	1.70249	1.81
807	0.306021	0.29074	0.173307	0.268195	0.367485	0.418146	1.53656	0.451	0.463	0.568	0.454	0.448	0.451	1.562	1.44554	0.702382	1.35988	1.88828	2.13431	0.445965	0.368481	-0.353279	0.307395	0.635668	0.758142	5.76045	4.93349	1.16478	4.36613	8.41841	10.755	1.54922	1.49035	1.03887	1.44552	1.70336	1.81093
806.5	0.306042	0.290771	0.173206	0.268263	0.367376	0.41798	1.53751	0.451	0.463	0.568	0.454	0.448	0.451	1.5621	1.44569	0.701972	1.36022	1.88772	2.13346	0.446033	0.368587	-0.353861	0.307649	0.635371	0.757745	5.76839	4.94067	1.16486	4.37376	8.42385	10.7598	1.54976	1.49089	1.03889	1.44615	1.70364	1.81113
806	0.305976	0.290579	0.173271	0.268275	0.367288	0.417898	1.53846	0.451	0.463	0.568	0.454	0.448	0.451	1.56177	1.44474	0.702236	1.36028	1.88727	2.13304	0.445818	0.367927	-0.353486	0.307694	0.635131	0.757548	5.77305	4.94027	1.16718	4.37958	8.43027	10.7689	1.55007	1.49086	1.0394	1.44663	1.70396	1.81152
805.5	0.306027	0.290712	0.17334	0.26849	0.367103	0.41809	1.53942	0.451	0.463	0.568	0.454	0.448	0.451	1.56203	1.4454	0.702515	1.36137	1.88632	2.13402	0.445984	0.368384	-0.353088	0.308495	0.634628	0.758008	5.78215	4.95093	1.16956	4.39205	8.43224	10.7922	1.55068	1.49167	1.03993	1.44766	1.70406	1.8125
805	0.305937	0.290652	0.173127	0.268563	0.366997	0.418274	1.54037	0.451	0.463	0.568	0.454	0.448	0.451	1.56157	1.4451	0.701652	1.36174	1.88577	2.13496	0.44569	0.368178	-0.354318	0.308767	0.634339	0.758448	5.78593	4.95504	1.16814	4.3999	8.43784	10.8151	1.55093	1.49198	1.03962	1.44831	1.70435	1.81346
804.5	0.30596	0.290795	0.173037	0.268606	0.367019	0.417946	1.54133	0.451	0.463	0.568	0.454	0.448	0.451	1.56168	1.44581	0.701287	1.36196	1.88589	2.13329	0.445765	0.36867	-0.354838	0.308927	0.634399	0.757663	5.794	4.96608	1.16838	4.40678	8.44934	10.8116	1.55147	1.49281	1.03967	1.44887	1.70493	1.81331
804	0.305938	0.290559	0.172976	0.268872	0.366741	0.417915	1.54229	0.451	0.463	0.568	0.454	0.448	0.451	1.56157	1.44464	0.70104	1.36331	1.88446	2.13313	0.445693	0.367858	-0.35519	0.309917	0.633641	0.757589	5.80037	4.96419	1.16901	4.42101	8.44705	10.8234	1.5519	1.49266	1.03981	1.45004	1.70481	1.81381
803.5	0.305865	0.290503	0.172907	0.26881	0.366872	0.417817	1.54325	0.451	0.463	0.568	0.454	0.448	0.451	1.5612	1.44436	0.70076	1.363	1.88513	2.13263	0.445455	0.367665	-0.355589	0.309686	0.633998	0.757355	5.80482	4.96846	1.16953	4.42447	8.4636	10.8318	1.5522	1.49298	1.03993	1.45033	1.70565	1.81416
803	0.305798	0.290757	0.172828	0.26884	0.367004	0.418091	1.54421	0.451	0.463	0.568	0.454	0.448	0.451	1.56086	1.44562	0.70044	1.36315	1.88581	2.13403	0.445236	0.368539	-0.356046	0.309798	0.634358	0.75801	5.8095	4.98335	1.16992	4.43097	8.48025	10.8595	1.55251	1.4941	1.04001	1.45086	1.70648	1.81532
802.5	0.305747	0.29073	0.172743	0.268814	0.366968	0.418143	1.54517	0.451	0.463	0.568	0.454	0.448	0.451	1.5606	1.44549	0.700096	1.36302	1.88563	2.13429	0.445069	0.368446	-0.356538	0.309701	0.63426	0.758134	5.81481	4.98863	1.17022	4.43564	8.48915	10.8758	1.55287	1.4945	1.04008	1.45124	1.70693	1.816
802	0.305798	0.290416	0.1728	0.268888	0.366695	0.418328	1.54613	0.451	0.463	0.568	0.454	0.448	0.451	1.56086	1.44393	0.700327	1.36339	1.88422	2.13524	0.445236	0.367366	-0.356208	0.309976	0.633516	0.758577	5.824	4.98407	1.17245	4.44361	8.4871	10.899	1.55348	1.49416	1.04058	1.45189	1.70683	1.81696
801.5	0.30584	0.290604	0.172682	0.268957	0.366789	0.418202	1.5471	0.451	0.463	0.568	0.454	0.448	0.451	1.56107	1.44486	0.699849	1.36374	1.88471	2.13459	0.445373	0.368013	-0.356891	0.310233	0.633772	0.758276	5.83287	4.99676	1.17232	4.45144	8.50205	10.906	1.55407	1.49511	1.04055	1.45253	1.70758	1.81726
801	0.305844	0.290504	0.172465	0.268748	0.366648	0.418159	1.54806	0.451	0.463	0.568	0.454	0.448	0.451	1.56109	1.44436	0.698969	1.36268	1.88398	2.13437	0.445386	0.367669	-0.358149	0.309455	0.633387	0.758173	5.84031	4.99955	1.17083	4.45008	8.50612	10.9174	1.55457	1.49532	1.04022	1.45242	1.70778	1.81773
800.5	0.305885	0.290464	0.172634	0.269166	0.366433	0.417996	1.54903	0.451	0.463	0.568	0.454	0.448	0.451	1.5613	1.44416	0.699654	1.3648	1.88288	2.13354	0.44552	0.367531	-0.357169	0.311009	0.632801	0.757783	5.84917	5.00442	1.17459	4.46951	8.50677	10.9225	1.55515	1.49568	1.04105	1.454	1.70782	1.81794
800	0.30589	0.290526	0.172473	0.268987	0.366324	0.418253	1.55	0.451	0.463	0.568	0.454	0.448	0.451	1.56133	1.44447	0.699001	1.36389	1.88232	2.13485	0.445537	0.367744	-0.358102	0.310344	0.632503	0.758397	5.85668	5.01282	1.17387	4.46915	8.51234	10.9496	1.55565	1.49631	1.04089	1.45397	1.7081	1.81907
799.5	0.305875	0.290584	0.172377	0.269151	0.366498	0.418177	1.55097	0.451	0.463	0.568	0.454	0.448	0.451	1.56125	1.44476	0.698612	1.36473	1.88321	2.13446	0.445487	0.367944	-0.358659	0.310954	0.632978	0.758216	5.86343	5.0211	1.17403	4.4802	8.53108	10.9593	1.5561	1.49692	1.04093	1.45487	1.70904	1.81947
799	0.305815	0.290181	0.172448	0.269298	0.366428	0.418147	1.55194	0.451	0.463	0.568	0.454	0.448	0.451	1.56094	1.44276	0.6989	1.36547	1.88285	2.13431	0.445291	0.366556	-0.358247	0.3115	0.632787	0.758144	5.86847	5.01345	1.17647	4.49071	8.5385	10.9715	1.55644	1.49635	1.04147	1.45572	1.70941	1.81998
798.5	0.305722	0.29054	0.172344	0.269154	0.36639	0.418226	1.55291	0.451	0.463	0.568	0.454	0.448	0.451	1.56047	1.44454	0.698479	1.36474	1.88266	2.13471	0.444987	0.367793	-0.358851	0.310965	0.632683	0.758333	5.87225	5.03216	1.17652	4.49153	8.54743	10.9894	1.55669	1.49775	1.04148	1.45579	1.70985	1.82072
798	0.305763	0.290176	0.172371	0.269371	0.366377	0.41824	1.55388	0.451	0.463	0.568	0.454	0.448	0.451	1.56068	1.44273	0.698588	1.36584	1.88259	2.13479	0.445121	0.366539	-0.358694	0.311771	0.632648	0.758366	5.88119	5.02585	1.17837	4.50441	8.55753	11.0039	1.55728	1.49728	1.04189	1.45683	1.71036	1.82132
797.5	0.305752	0.290343	0.172047	0.269209	0.36637	0.418038	1.55486	0.451	0.463	0.568	0.454	0.448	0.451	1.56062	1.44356	0.697275	1.36502	1.88255	2.13375	0.445085	0.367114	-0.360575	0.311169	0.632629	0.757883	5.88814	5.03794	1.17541	4.50464	8.56794	11.0071	1.55774	1.49818	1.04123	1.45685	1.71088	1.82145
797	0.305654	0.290227	0.172188	0.26942	0.366161	0.418315	1.55583	0.451	0.463	0.568	0.454	0.448	0.451	1.56012	1.44299	0.697846	1.36609	1.88148	2.13517	0.444765	0.366715	-0.359756	0.311953	0.632058	0.758546	5.89175	5.04024	1.17882	4.51737	8.56891	11.0355	1.55798	1.49835	1.04199	1.45788	1.71093	1.82263
796.5	0.305704	0.290211	0.172131	0.269466	0.366303	0.417995	1.55681	0.451	0.463	0.568	0.454	0.448	0.451	1.56038	1.44291	0.697615	1.36632	1.88221	2.13354	0.444928	0.36666	-0.360087	0.312123	0.632446	0.75778	5.90108	5.04601	1.17952	4.52458	8.58633	11.0324	1.55859	1.49878	1.04214	1.45846	1.7118	1.8225
796	0.305619	0.290062	0.171941	0.269424	0.366327	0.418177	1.55779	0.451	0.463	0.568	0.454	0.448	0.451	1.55994	1.44217	0.696845	1.36611	1.88233	2.13446	0.44465	0.366146	-0.361192	0.311967	0.632511	0.758216	5.90521	5.04717	1.17839	4.52886	8.59824	11.0559	1.55887	1.49886	1.04189	1.4588	1.71239	1.82347
795.5	0.305674	0.290168	0.171766	0.269311	0.366168	0.418154	1.55877	0.451	0.463	0.568	0.454	0.448	0.451	1.56023	1.44269	0.696136	1.36554	1.88152	2.13435	0.44483	0.366511	-0.36221	0.311548	0.632077	0.758161	5.91477	5.05721	1.17747	4.53075	8.60158	11.0686	1.5595	1.49961	1.04169	1.45896	1.71256	1.82399
795	0.305646	0.290315	0.171782	0.269617	0.366006	0.418163	1.55975	0.451	0.463	0.568	0.454	0.448	0.451	1.56008	1.44342	0.696201	1.36709	1.88068	2.13439	0.444739	0.367018	-0.362117	0.312684	0.631635	0.758182	5.92112	5.0687	1.17918	4.54677	8.60479	11.083	1.55992	1.50046	1.04206	1.46024	1.71271	1.82459
794.5	0.305604	0.290091	0.171868	0.269369	0.366179	0.418158	1.56073	0.451	0.463	0.568	0.454	0.448	0.451	1.55987	1.44231	0.69655	1.36583	1.88157	2.13437	0.444601	0.366246	-0.361616	0.311763	0.632107	0.75817	5.92695	5.06725	1.18184	4.54412	8.62377	11.0967	1.5603	1.50035	1.04265	1.46003	1.71366	1.82515
794	0.305609	0.29017	0.171687	0.26933	0.365971	0.418235	1.56171	0.451	0.463	0.568	0.454	0.448	0.451	1.55989	1.4427	0.695816	1.36563	1.8805	2.13476	0.444617	0.366518	-0.36267	0.311619	0.631539	0.758354	5.93461	5.0764	1.18084	4.54853	8.62483	11.1148	1.5608	1.50103	1.04243	1.46039	1.71371	1.82589
793.5	0.30561	0.289902	0.17166	0.269504	0.365883	0.418135	1.5627	0.451	0.463	0.568	0.454	0.448	0.451	1.5599	1.44137	0.695707	1.36652	1.88005	2.13425	0.444621	0.365594	-0.362827	0.312264	0.631299	0.758115	5.94213	5.07342	1.18196	4.56015	8.63155	11.1235	1.5613	1.50081	1.04268	1.46132	1.71404	1.82625
793	0.305546	0.29009	0.171424	0.269595	0.365935	0.418248	1.56368	0.451	0.463	0.568	0.454	0.448	0.451	1.55957	1.4423	0.69475	1.36698	1.88032	2.13483	0.444411	0.366242	-0.364203	0.312602	0.631441	0.758386	5.94713	5.08641	1.1802	4.56898	8.64489	11.1435	1.56163	1.50177	1.04229	1.46203	1.71471	1.82707
792.5	0.305503	0.289981	0.171546	0.269732	0.365674	0.418171	1.56467	0.451	0.463	0.568	0.454	0.448	0.451	1.55935	1.44176	0.695245	1.36767	1.87898	2.13443	0.444271	0.365867	-0.363492	0.31311	0.630727	0.758201	5.95297	5.089	1.18337	4.5794	8.64346	11.1535	1.56201	1.50196	1.04299	1.46286	1.71464	1.82748
792	0.305523	0.290133	0.171343	0.269766	0.365811	0.418311	1.56566	0.451	0.463	0.568	0.454	0.448	0.451	1.55945	1.44252	0.694422	1.36784	1.87968	2.13515	0.444336	0.366391	-0.364676	0.313236	0.631102	0.758536	5.96126	5.10077	1.18206	4.58634	8.66086	11.175	1.56255	1.50283	1.0427	1.46341	1.7155	1.82836
791.5	0.305453	0.289962	0.171406	0.269939	0.365636	0.418507	1.56665	0.451	0.463	0.568	0.454	0.448	0.451	1.5591	1.44167	0.694677	1.36872	1.87878	2.13615	0.444107	0.365801	-0.364308	0.313877	0.630623	0.759005	5.96606	5.1012	1.18442	4.59803	8.66351	11.1997	1.56287	1.50286	1.04322	1.46434	1.71563	1.82937
791	0.305383	0.290022	0.171344	0.270126	0.365568	0.418264	1.56764	0.451	0.463	0.568	0.454	0.448	0.451	1.55874	1.44197	0.694426	1.36967	1.87843	2.13491	0.443878	0.366008	-0.36467	0.31457	0.630437	0.758424	5.97087	5.10977	1.18507	4.61022	8.67124	11.2008	1.56318	1.50349	1.04336	1.46531	1.71601	1.82941
790.5	0.305491	0.289798	0.171117	0.270053	0.365758	0.418439	1.56863	0.451	0.463	0.568	0.454	0.448	0.451	1.55929	1.44085	0.693506	1.3693	1.87941	2.1358	0.444231	0.365235	-0.365996	0.314299	0.630957	0.758842	5.98266	5.10833	1.18342	4.61356	8.69124	11.2244	1.56395	1.50338	1.043	1.46558	1.717	1.83038
790	0.305477	0.289722	0.171054	0.269978	0.365727	0.418292	1.56962	0.451	0.463	0.568	0.454	0.448	0.451	1.55922	1.44048	0.693251	1.36892	1.87925	2.13505	0.444185	0.364973	-0.366364	0.314022	0.630872	0.758491	5.98968	5.11212	1.18405	4.61684	8.70077	11.2307	1.56441	1.50366	1.04314	1.46584	1.71747	1.83063
789.5	0.305413	0.289623	0.170973	0.270173	0.365468	0.418486	1.57061	0.451	0.463	0.568	0.454	0.448	0.451	1.55889	1.43998	0.692922	1.36991	1.87792	2.13604	0.443976	0.364631	-0.366837	0.314744	0.630164	0.758954	5.99476	5.1151	1.18443	4.62937	8.69946	11.2553	1.56474	1.50388	1.04322	1.46683	1.71741	1.83164
789	0.305398	0.289839	0.170815	0.270147	0.365271	0.418277	1.57161	0.451	0.463	0.568	0.454	0.448	0.451	1.55882	1.44106	0.692282	1.36978	1.87691	2.13497	0.443927	0.365377	-0.367762	0.314647	0.629625	0.758455	6.00177	5.12922	1.18374	4.63435	8.7011	11.2584	1.5652	1.50492	1.04307	1.46723	1.71749	1.83176
788.5	0.305531	0.289847	0.171182	0.270204	0.365263	0.418123	1.57261	0.451	0.463	0.568	0.454	0.448	0.451	1.5595	1.4411	0.693769	1.37007	1.87686	2.13419	0.444362	0.365404	-0.365616	0.314858	0.629603	0.758087	6.01462	5.13601	1.19034	4.64219	8.71176	11.2643	1.56604	1.50542	1.04452	1.46785	1.71801	1.832
788	0.305485	0.289535	0.170918	0.270281	0.365461	0.418361	1.5736	0.451	0.463	0.568	0.454	0.448	0.451	1.55926	1.43955	0.692699	1.37046	1.87788	2.1354	0.444212	0.364327	-0.367159	0.315143	0.630145	0.758656	6.02044	5.13147	1.18818	4.65073	8.73228	11.2915	1.56642	1.50508	1.04405	1.46852	1.71902	1.83311
787.5	0.305461	0.289796	0.170862	0.27044	0.365281	0.418226	1.5746	0.451	0.463	0.568	0.454	0.448	0.451	1.55914	1.44084	0.692472	1.37126	1.87696	2.13471	0.444133	0.365228	-0.367487	0.315731	0.629652	0.758333	6.02714	5.14725	1.18891	4.66212	8.73476	11.2985	1.56685	1.50624	1.04421	1.46942	1.71915	1.83339
787	0.305384	0.289749	0.170861	0.270308	0.365164	0.418226	1.5756	0.451	0.463	0.568	0.454	0.448	0.451	1.55874	1.44061	0.692468	1.37059	1.87636	2.13471	0.443881	0.365066	-0.367493	0.315243	0.629332	0.758333	6.03176	5.15213	1.1904	4.66349	8.74026	11.3129	1.56715	1.5066	1.04454	1.46953	1.71942	1.83397
786.5	0.305443	0.289769	0.170572	0.270728	0.36515	0.418458	1.57661	0.451	0.463	0.568	0.454	0.448	0.451	1.55905	1.44071	0.691297	1.37272	1.87628	2.1359	0.444074	0.365135	-0.369186	0.316796	0.629293	0.758887	6.04176	5.15939	1.18789	4.68394	8.75071	11.3398	1.5678	1.50713	1.04398	1.47114	1.71993	1.83507
786	0.305419	0.289556	0.17061	0.270705	0.365032	0.418199	1.57761	0.451	0.463	0.568	0.454	0.448	0.451	1.55892	1.43965	0.691451	1.37261	1.87568	2.13458	0.443996	0.3644	-0.368963	0.316711	0.62897	0.758268	6.0485	5.15837	1.18993	4.6891	8.75618	11.3402	1.56824	1.50705	1.04443	1.47154	1.7202	1.83508
785.5	0.305396	0.289242	0.170614	0.270629	0.364717	0.418192	1.57861	0.451	0.463	0.568	0.454	0.448	0.451	1.55881	1.43809	0.691467	1.37222	1.87406	2.13454	0.44392	0.363315	-0.368939	0.31643	0.628107	0.758252	6.05529	5.15374	1.1915	4.69244	8.75221	11.3543	1.56868	1.50671	1.04478	1.4718	1.72	1.83565
785	0.305353	0.289517	0.170365	0.270637	0.365012	0.418329	1.57962	0.451	0.463	0.568	0.454	0.448	0.451	1.55859	1.43946	0.690458	1.37226	1.87558	2.13524	0.443779	0.364265	-0.3704	0.31646	0.628915	0.758579	6.0613	5.17012	1.18954	4.6987	8.77754	11.3762	1.56907	1.50791	1.04435	1.47229	1.72125	1.83654
784.5	0.305285	0.289461	0.170454	0.270714	0.364733	0.418373	1.58062	0.451	0.463	0.568	0.454	0.448	0.451	1.55824	1.43918	0.690819	1.37265	1.87414	2.13546	0.443557	0.364072	-0.369878	0.316744	0.628151	0.758684	6.06633	5.17471	1.1923	4.70736	8.7753	11.3931	1.56939	1.50824	1.04495	1.47297	1.72114	1.83722
784	0.30528	0.28954	0.170369	0.270601	0.364888	0.418709	1.58163	0.451	0.463	0.568	0.454	0.448	0.451	1.55821	1.43957	0.690474	1.37208	1.87494	2.13718	0.44354	0.364345	-0.370376	0.316327	0.628576	0.759487	6.07387	5.18414	1.19263	4.70944	8.79397	11.426	1.56988	1.50893	1.04502	1.47313	1.72205	1.83854
783.5	0.305284	0.28951	0.17045	0.270836	0.364547	0.418318	1.58264	0.451	0.463	0.568	0.454	0.448	0.451	1.55823	1.43942	0.690803	1.37327	1.87319	2.13518	0.443553	0.364241	-0.369901	0.317195	0.627641	0.758553	6.08178	5.18969	1.19529	4.72364	8.78875	11.4192	1.57039	1.50933	1.04561	1.47424	1.7218	1.83827
783	0.305288	0.289399	0.170163	0.270916	0.364815	0.418153	1.58365	0.451	0.463	0.568	0.454	0.448	0.451	1.55825	1.43887	0.689639	1.37368	1.87456	2.13434	0.443567	0.363858	-0.371586	0.31749	0.628375	0.758158	6.08971	5.19233	1.19279	4.73247	8.81292	11.4248	1.5709	1.50953	1.04506	1.47493	1.72298	1.83849
782.5	0.305196	0.289396	0.170009	0.270689	0.364654	0.418391	1.58466	0.451	0.463	0.568	0.454	0.448	0.451	1.55779	1.43885	0.689015	1.37252	1.87374	2.13556	0.443265	0.363847	-0.372492	0.316652	0.627934	0.758727	6.09382	5.19886	1.19215	4.73058	8.8164	11.4524	1.57117	1.51	1.04492	1.47478	1.72315	1.8396
782	0.305286	0.289293	0.170105	0.270726	0.364598	0.418435	1.58568	0.451	0.463	0.568	0.454	0.448	0.451	1.55824	1.43834	0.689404	1.37271	1.87345	2.13578	0.44356	0.363491	-0.371927	0.316788	0.62778	0.758833	6.10522	5.20181	1.19503	4.73793	8.82497	11.4695	1.5719	1.51021	1.04555	1.47536	1.72357	1.84029
781.5	0.3053	0.289296	0.170058	0.271001	0.364704	0.418826	1.58669	0.451	0.463	0.568	0.454	0.448	0.451	1.55832	1.43836	0.689214	1.37411	1.87399	2.13778	0.443606	0.363502	-0.372204	0.317804	0.628071	0.759767	6.11359	5.20857	1.1959	4.75364	8.8414	11.5056	1.57244	1.51071	1.04574	1.47658	1.72437	1.84174
781	0.30523	0.289254	0.170003	0.270965	0.364618	0.418474	1.58771	0.451	0.463	0.568	0.454	0.448	0.451	1.55796	1.43815	0.688991	1.37392	1.87355	2.13598	0.443377	0.363356	-0.372527	0.317671	0.627835	0.758926	6.11862	5.21373	1.19665	4.75846	8.84855	11.501	1.57276	1.51108	1.0459	1.47695	1.72472	1.84155
780.5	0.305181	0.289377	0.16996	0.27104	0.36445	0.418425	1.58873	0.451	0.463	0.568	0.454	0.448	0.451	1.55771	1.43876	0.688817	1.3743	1.87269	2.13573	0.443216	0.363782	-0.37278	0.317948	0.627374	0.758809	6.12449	5.22485	1.19758	4.7672	8.85173	11.513	1.57314	1.51188	1.04611	1.47763	1.72487	1.84203
780	0.305077	0.289406	0.169694	0.271287	0.364425	0.418399	1.58974	0.451	0.463	0.568	0.454	0.448	0.451	1.55718	1.4389	0.687739	1.37556	1.87256	2.1356	0.442875	0.363882	-0.374346	0.318858	0.627306	0.758746	6.12817	5.2326	1.19537	4.78202	8.86186	11.5264	1.57338	1.51244	1.04562	1.47878	1.72537	1.84257
779.5	0.305185	0.289341	0.169549	0.271443	0.364375	0.418306	1.59076	0.451	0.463	0.568	0.454	0.448	0.451	1.55773	1.43858	0.687151	1.37635	1.8723	2.13512	0.443229	0.363657	-0.375201	0.319433	0.627169	0.758524	6.14038	5.23697	1.19486	4.79366	8.8708	11.536	1.57416	1.51276	1.04551	1.47968	1.7258	1.84295
779	0.305121	0.289102	0.169615	0.271553	0.3644	0.418292	1.59178	0.451	0.463	0.568	0.454	0.448	0.451	1.5574	1.43739	0.687419	1.37691	1.87243	2.13505	0.443019	0.362831	-0.374812	0.319838	0.627237	0.758491	6.14568	5.23503	1.19732	4.80371	8.88341	11.5501	1.5745	1.51262	1.04605	1.48045	1.72641	1.84351
778.5	0.305099	0.289023	0.169313	0.271793	0.364203	0.418277	1.59281	0.451	0.463	0.568	0.454	0.448	0.451	1.55729	1.437	0.686195	1.37812	1.87142	2.13497	0.442947	0.362558	-0.376594	0.320722	0.626696	0.758455	6.15269	5.23889	1.1946	4.81839	8.88521	11.5641	1.57495	1.5129	1.04545	1.48158	1.7265	1.84407
778	0.30503	0.289014	0.169493	0.271554	0.363978	0.418439	1.59383	0.451	0.463	0.568	0.454	0.448	0.451	1.55694	1.43696	0.686924	1.37691	1.87026	2.1358	0.442721	0.362526	-0.375531	0.319842	0.626079	0.758842	6.15782	5.2453	1.19868	4.8161	8.88565	11.5879	1.57528	1.51336	1.04635	1.48141	1.72652	1.84502
777.5	0.305052	0.289241	0.16936	0.271828	0.363871	0.41845	1.59486	0.451	0.463	0.568	0.454	0.448	0.451	1.55705	1.43808	0.686385	1.3783	1.86971	2.13586	0.442793	0.363312	-0.376316	0.320851	0.625784	0.758868	6.16663	5.26031	1.19833	4.83203	8.89185	11.6035	1.57584	1.51444	1.04627	1.48263	1.72682	1.84564
777	0.304958	0.289089	0.169426	0.271623	0.363889	0.418528	1.59588	0.451	0.463	0.568	0.454	0.448	0.451	1.55657	1.43733	0.686653	1.37726	1.8698	2.13626	0.442485	0.362786	-0.375927	0.320096	0.625834	0.759055	6.17076	5.26154	1.20081	4.83096	8.90418	11.6227	1.5761	1.51453	1.04681	1.48255	1.72742	1.84641
776.5	0.304977	0.288843	0.169211	0.271902	0.364012	0.41863	1.59691	0.451	0.463	0.568	0.454	0.448	0.451	1.55667	1.4361	0.685781	1.37867	1.87044	2.13678	0.442547	0.361935	-0.377197	0.321123	0.626172	0.759298	6.17948	5.25936	1.19931	4.84712	8.92168	11.6434	1.57666	1.51437	1.04648	1.48379	1.72827	1.84722
776	0.305004	0.288837	0.169037	0.271497	0.363864	0.418601	1.59794	0.451	0.463	0.568	0.454	0.448	0.451	1.55681	1.43608	0.685076	1.37662	1.86968	2.13663	0.442636	0.361914	-0.378225	0.319632	0.625765	0.759229	6.18854	5.26592	1.19839	4.83893	8.92591	11.6568	1.57724	1.51485	1.04628	1.48316	1.72848	1.84776
775.5	0.304929	0.288926	0.169253	0.271732	0.363704	0.418629	1.59897	0.451	0.463	0.568	0.454	0.448	0.451	1.55642	1.43652	0.685951	1.37781	1.86885	2.13677	0.44239	0.362222	-0.376948	0.320497	0.625325	0.759296	6.19348	5.27596	1.203	4.85356	8.92957	11.6734	1.57755	1.51557	1.04729	1.48428	1.72865	1.84841
775	0.305036	0.288864	0.1692	0.271914	0.363865	0.418753	1.6	0.451	0.463	0.568	0.454	0.448	0.451	1.55697	1.43621	0.685737	1.37874	1.86968	2.1374	0.442741	0.362007	-0.377262	0.321167	0.625768	0.759592	6.20583	5.28051	1.2038	4.86634	8.94901	11.6954	1.57834	1.51589	1.04746	1.48525	1.72959	1.84928
774.5	0.304959	0.289072	0.169091	0.271905	0.363624	0.418523	1.60103	0.451	0.463	0.568	0.454	0.448	0.451	1.55658	1.43724	0.685295	1.37869	1.86844	2.13623	0.442488	0.362727	-0.377906	0.321134	0.625105	0.759043	6.21071	5.29494	1.2038	4.8723	8.94871	11.6976	1.57865	1.51693	1.04746	1.48571	1.72958	1.84937
774	0.305003	0.28883	0.168914	0.271818	0.363612	0.41853	1.60207	0.451	0.463	0.568	0.454	0.448	0.451	1.5568	1.43604	0.684578	1.37825	1.86838	2.13627	0.442633	0.36189	-0.378953	0.320814	0.625072	0.75906	6.22053	5.29291	1.20284	4.87547	8.95968	11.7131	1.57927	1.51678	1.04725	1.48595	1.73011	1.84998
773.5	0.305006	0.288848	0.168651	0.271986	0.363582	0.418659	1.6031	0.451	0.463	0.568	0.454	0.448	0.451	1.55682	1.43613	0.683512	1.3791	1.86823	2.13692	0.442642	0.361952	-0.380512	0.321432	0.62499	0.759368	6.22869	5.30042	1.20064	4.88782	8.96979	11.7355	1.57979	1.51732	1.04678	1.48689	1.7306	1.85087
773	0.304981	0.288844	0.168622	0.272017	0.363345	0.418634	1.60414	0.451	0.463	0.568	0.454	0.448	0.451	1.55669	1.43611	0.683394	1.37926	1.86701	2.1368	0.44256	0.361938	-0.380684	0.321546	0.624338	0.759308	6.23573	5.30713	1.20179	4.89526	8.96969	11.7493	1.58024	1.5178	1.04702	1.48746	1.73059	1.85141
772.5	0.304972	0.288705	0.168695	0.272157	0.36338	0.418783	1.60518	0.451	0.463	0.568	0.454	0.448	0.451	1.55664	1.43542	0.68369	1.37997	1.86719	2.13756	0.442531	0.361457	-0.380251	0.32206	0.624434	0.759664	6.24344	5.30889	1.20438	4.90664	8.98303	11.7729	1.58072	1.51793	1.04759	1.48832	1.73123	1.85234
772	0.30497	0.288759	0.1686	0.272168	0.363366	0.418675	1.60622	0.451	0.463	0.568	0.454	0.448	0.451	1.55663	1.43569	0.683305	1.38002	1.86712	2.13701	0.442524	0.361644	-0.380814	0.322101	0.624396	0.759406	6.25145	5.31776	1.20459	4.9134	8.99398	11.782	1.58123	1.51856	1.04763	1.48883	1.73176	1.8527
771.5	0.304885	0.288472	0.168713	0.272337	0.363309	0.418786	1.60726	0.451	0.463	0.568	0.454	0.448	0.451	1.5562	1.43426	0.683763	1.38088	1.86682	2.13757	0.442246	0.360649	-0.380144	0.322721	0.624239	0.759671	6.25606	5.31407	1.20777	4.92588	9.00282	11.8036	1.58152	1.5183	1.04832	1.48978	1.73219	1.85355
771	0.304941	0.288736	0.168529	0.27232	0.363254	0.418598	1.6083	0.451	0.463	0.568	0.454	0.448	0.451	1.55648	1.43557	0.683017	1.38079	1.86654	2.13661	0.442429	0.361564	-0.381235	0.322659	0.624087	0.759222	6.26648	5.33071	1.2067	4.93165	9.01177	11.8083	1.58218	1.51948	1.04809	1.49021	1.73262	1.85373
770.5	0.304922	0.288739	0.168487	0.272193	0.363266	0.418758	1.60934	0.451	0.463	0.568	0.454	0.448	0.451	1.55639	1.43559	0.682847	1.38015	1.8666	2.13743	0.442367	0.361574	-0.381485	0.322192	0.62412	0.759604	6.27384	5.33774	1.20766	4.93345	9.02406	11.8326	1.58264	1.51999	1.0483	1.49035	1.73321	1.85469
770	0.304839	0.288582	0.168364	0.272302	0.363155	0.418539	1.61039	0.451	0.463	0.568	0.454	0.448	0.451	1.55596	1.43481	0.682348	1.3807	1.86603	2.13631	0.442095	0.361031	-0.382215	0.322593	0.623815	0.759081	6.27857	5.33887	1.20746	4.94382	9.03027	11.8356	1.58294	1.52007	1.04826	1.49113	1.73351	1.8548
769.5	0.304827	0.288357	0.16816	0.272507	0.363002	0.418769	1.61144	0.451	0.463	0.568	0.454	0.448	0.451	1.5559	1.43369	0.681522	1.38174	1.86525	2.13749	0.442055	0.360251	-0.383427	0.323345	0.623393	0.75963	6.28623	5.33747	1.20611	4.9577	9.03439	11.864	1.58343	1.51997	1.04796	1.49218	1.7337	1.85592
769	0.304807	0.288663	0.168396	0.272408	0.362971	0.418649	1.61248	0.451	0.463	0.568	0.454	0.448	0.451	1.5558	1.43521	0.682478	1.38124	1.86509	2.13687	0.44199	0.361311	-0.382025	0.322982	0.623308	0.759344	6.29359	5.35577	1.21107	4.96054	9.0446	11.8727	1.58389	1.52127	1.04904	1.49239	1.73419	1.85625
768.5	0.304725	0.28846	0.16835	0.272594	0.363029	0.41864	1.61353	0.451	0.463	0.568	0.454	0.448	0.451	1.55538	1.4342	0.682292	1.38218	1.86539	2.13683	0.441721	0.360608	-0.382298	0.323665	0.623468	0.759322	6.29839	5.3552	1.21198	4.97379	9.05926	11.8876	1.58419	1.52123	1.04924	1.49339	1.7349	1.85684
768	0.304766	0.288576	0.168072	0.272598	0.363005	0.418792	1.61458	0.451	0.463	0.568	0.454	0.448	0.451	1.55559	1.43478	0.681165	1.3822	1.86526	2.1376	0.441855	0.36101	-0.383951	0.323679	0.623402	0.759685	6.30829	5.36649	1.20956	4.98041	9.06986	11.9117	1.58481	1.52203	1.04871	1.49388	1.7354	1.85778
767.5	0.304746	0.288735	0.168042	0.27269	0.362884	0.418821	1.61564	0.451	0.463	0.568	0.454	0.448	0.451	1.55549	1.43557	0.681043	1.38267	1.86464	2.13775	0.44179	0.361561	-0.384129	0.324017	0.623068	0.759755	6.31568	5.3794	1.2107	4.99027	9.07563	11.9289	1.58528	1.52294	1.04896	1.49462	1.73568	1.85845
767	0.304685	0.288308	0.167892	0.272776	0.362837	0.418938	1.61669	0.451	0.463	0.568	0.454	0.448	0.451	1.55518	1.43344	0.680436	1.38311	1.8644	2.13835	0.441589	0.360081	-0.385022	0.324332	0.622939	0.760034	6.32139	5.3705	1.21011	4.99993	9.08511	11.9512	1.58563	1.52231	1.04883	1.49534	1.73613	1.85931
766.5	0.304647	0.288454	0.167996	0.272747	0.362933	0.418686	1.61774	0.451	0.463	0.568	0.454	0.448	0.451	1.55498	1.43417	0.680857	1.38296	1.86489	2.13706	0.441465	0.360587	-0.384403	0.324226	0.623203	0.759432	6.32806	5.38296	1.2132	5.00539	9.10179	11.9524	1.58605	1.52319	1.0495	1.49575	1.73693	1.85936
766	0.304737	0.288433	0.16774	0.272887	0.362864	0.418615	1.6188	0.451	0.463	0.568	0.454	0.448	0.451	1.55544	1.43407	0.67982	1.38367	1.86454	2.1367	0.44176	0.360514	-0.385928	0.324739	0.623013	0.759263	6.34007	5.3892	1.21108	5.01707	9.11021	11.9639	1.5868	1.52364	1.04904	1.49662	1.73733	1.85981
765.5	0.304706	0.288325	0.1679	0.272842	0.362775	0.418668	1.61986	0.451	0.463	0.568	0.454	0.448	0.451	1.55528	1.43353	0.680468	1.38344	1.86408	2.13697	0.441658	0.36014	-0.384975	0.324574	0.622768	0.759389	6.34706	5.3922	1.21498	5.02197	9.11764	11.9826	1.58724	1.52385	1.04989	1.49699	1.73768	1.86053
765	0.304725	0.2882	0.167616	0.273221	0.362772	0.418783	1.62092	0.451	0.463	0.568	0.454	0.448	0.451	1.55538	1.43291	0.679317	1.38536	1.86407	2.13756	0.441721	0.359706	-0.386667	0.325962	0.62276	0.759664	6.35615	5.39457	1.21245	5.04252	9.12941	12.0048	1.58781	1.52402	1.04934	1.49852	1.73824	1.8614
764.5	0.304649	0.288436	0.167664	0.273212	0.362452	0.41904	1.62198	0.451	0.463	0.568	0.454	0.448	0.451	1.55499	1.43408	0.679511	1.38532	1.86242	2.13887	0.441471	0.360524	-0.386381	0.325929	0.621877	0.760277	6.36129	5.41048	1.21474	5.04878	9.12523	12.0353	1.58813	1.52514	1.04983	1.49898	1.73804	1.86258
764	0.304635	0.288418	0.167573	0.273466	0.362379	0.418835	1.62304	0.451	0.463	0.568	0.454	0.448	0.451	1.55492	1.43399	0.679143	1.38661	1.86205	2.13782	0.441425	0.360462	-0.386924	0.326858	0.621676	0.759788	6.36904	5.41689	1.21501	5.0648	9.1335	12.0393	1.58861	1.52559	1.04989	1.50017	1.73844	1.86273
763.5	0.304631	0.28819	0.167502	0.273149	0.362439	0.419007	1.6241	0.451	0.463	0.568	0.454	0.448	0.451	1.5549	1.43286	0.678855	1.385	1.86235	2.1387	0.441412	0.359671	-0.387348	0.325699	0.621841	0.760199	6.37721	5.41542	1.21557	5.05968	9.1485	12.0649	1.58912	1.52548	1.05001	1.49979	1.73915	1.86372
763	0.304659	0.28817	0.167344	0.273248	0.362201	0.418966	1.62516	0.451	0.463	0.568	0.454	0.448	0.451	1.55504	1.43276	0.678215	1.3855	1.86113	2.13849	0.441504	0.359602	-0.388292	0.326061	0.621184	0.760101	6.38675	5.42176	1.21487	5.06999	9.14846	12.0784	1.58972	1.52593	1.04986	1.50055	1.73915	1.86424
762.5	0.304646	0.288338	0.167315	0.273493	0.362248	0.419141	1.62623	0.451	0.463	0.568	0.454	0.448	0.451	1.55498	1.43359	0.678097	1.38674	1.86137	2.13938	0.441461	0.360185	-0.388465	0.326957	0.621314	0.760518	6.39458	5.43521	1.21604	5.08575	9.16284	12.1044	1.5902	1.52688	1.05011	1.50172	1.73983	1.86524
762	0.304718	0.288233	0.167128	0.273351	0.362154	0.418937	1.6273	0.451	0.463	0.568	0.454	0.448	0.451	1.55535	1.43307	0.677339	1.38602	1.86089	2.13834	0.441698	0.35982	-0.389583	0.326438	0.621055	0.760032	6.406	5.43838	1.21491	5.08714	9.17011	12.1084	1.59091	1.5271	1.04987	1.50182	1.74018	1.8654
761.5	0.304766	0.288211	0.167114	0.273313	0.362141	0.418902	1.62837	0.451	0.463	0.568	0.454	0.448	0.451	1.55559	1.43296	0.677282	1.38583	1.86082	2.13816	0.441855	0.359744	-0.389667	0.326299	0.621019	0.759948	6.41644	5.44469	1.21631	5.09241	9.1815	12.1223	1.59156	1.52754	1.05017	1.50221	1.74072	1.86593
761	0.304563	0.28803	0.167151	0.273434	0.362194	0.418705	1.62943	0.451	0.463	0.568	0.454	0.448	0.451	1.55455	1.43206	0.677432	1.38644	1.8611	2.13716	0.441189	0.359116	-0.389446	0.326741	0.621165	0.759478	6.41632	5.445	1.21845	5.10362	9.19626	12.1268	1.59155	1.52756	1.05063	1.50304	1.74142	1.86611
760.5	0.304487	0.288302	0.16694	0.273649	0.361959	0.418777	1.63051	0.451	0.463	0.568	0.454	0.448	0.451	1.55417	1.43342	0.676577	1.38753	1.85989	2.13753	0.440939	0.36006	-0.390709	0.327527	0.620516	0.75965	6.42155	5.46247	1.21697	5.11837	9.19641	12.147	1.59188	1.52879	1.05032	1.50412	1.74142	1.86688
760	0.304518	0.287962	0.167068	0.273687	0.361893	0.418976	1.63158	0.451	0.463	0.568	0.454	0.448	0.451	1.55432	1.43172	0.677096	1.38773	1.85955	2.13854	0.441041	0.35888	-0.389942	0.327666	0.620334	0.760125	6.43131	5.45676	1.22044	5.12653	9.20516	12.1745	1.59248	1.52839	1.05106	1.50472	1.74184	1.86794
759.5	0.304591	0.288012	0.166937	0.27367	0.361796	0.418916	1.63265	0.451	0.463	0.568	0.454	0.448	0.451	1.5547	1.43197	0.676565	1.38764	1.85905	2.13824	0.441281	0.359053	-0.390727	0.327604	0.620066	0.759981	6.44287	5.46585	1.22013	5.13264	9.21234	12.1871	1.5932	1.52902	1.051	1.50517	1.74218	1.86842
759	0.304597	0.287723	0.166798	0.273761	0.361763	0.419003	1.63373	0.451	0.463	0.568	0.454	0.448	0.451	1.55473	1.43054	0.676002	1.3881	1.85888	2.13868	0.441301	0.358049	-0.39156	0.327937	0.619974	0.760189	6.45162	5.46207	1.21971	5.14283	9.2228	12.2082	1.59374	1.52876	1.05091	1.50592	1.74267	1.86923
758.5	0.30462	0.287814	0.166602	0.273944	0.361855	0.419148	1.63481	0.451	0.463	0.568	0.454	0.448	0.451	1.55485	1.43099	0.675207	1.38903	1.85935	2.13942	0.441376	0.358366	-0.392735	0.328605	0.620229	0.760535	6.4611	5.47274	1.21845	5.1565	9.23966	12.2328	1.59432	1.52951	1.05063	1.50691	1.74347	1.87017
758	0.304659	0.287854	0.166723	0.273878	0.361921	0.419112	1.63588	0.451	0.463	0.568	0.454	0.448	0.451	1.55504	1.43119	0.675698	1.38869	1.85969	2.13924	0.441504	0.358505	-0.392009	0.328364	0.620411	0.760449	6.47129	5.48148	1.22183	5.16081	9.25523	12.2468	1.59495	1.53012	1.05136	1.50723	1.7442	1.87071
757.5	0.304578	0.287764	0.166642	0.273853	0.36161	0.419056	1.63696	0.451	0.463	0.568	0.454	0.448	0.451	1.55463	1.43074	0.67537	1.38857	1.85809	2.13895	0.441238	0.358192	-0.392495	0.328273	0.619551	0.760316	6.47639	5.48529	1.22225	5.16669	9.25153	12.2597	1.59527	1.53038	1.05145	1.50766	1.74403	1.8712
757	0.304589	0.287901	0.166643	0.274057	0.361534	0.419076	1.63804	0.451	0.463	0.568	0.454	0.448	0.451	1.55469	1.43142	0.675374	1.3896	1.8577	2.13905	0.441274	0.358668	-0.392489	0.329017	0.619341	0.760363	6.48541	5.49777	1.22388	5.18122	9.25986	12.2771	1.59582	1.53125	1.0518	1.50872	1.74442	1.87186
756.5	0.304473	0.287805	0.166383	0.273939	0.361517	0.41899	1.63913	0.451	0.463	0.568	0.454	0.448	0.451	1.5541	1.43094	0.67432	1.389	1.85762	2.13861	0.440893	0.358334	-0.394051	0.328587	0.619294	0.760158	6.48904	5.50137	1.22168	5.18361	9.27123	12.2883	1.59605	1.5315	1.05133	1.50889	1.74496	1.87229
756	0.30445	0.287892	0.166489	0.273961	0.361532	0.419063	1.64021	0.451	0.463	0.568	0.454	0.448	0.451	1.55398	1.43138	0.674749	1.38912	1.85769	2.13899	0.440818	0.358637	-0.393414	0.328667	0.619336	0.760332	6.49665	5.51198	1.22486	5.1913	9.28427	12.3088	1.59651	1.53224	1.05201	1.50945	1.74557	1.87307
755.5	0.304502	0.287849	0.166385	0.27418	0.361475	0.418874	1.6413	0.451	0.463	0.568	0.454	0.448	0.451	1.55424	1.43116	0.674328	1.39023	1.8574	2.13802	0.440989	0.358487	-0.394039	0.329466	0.619178	0.759881	6.50747	5.51763	1.22495	5.20649	9.29363	12.314	1.59718	1.53263	1.05203	1.51055	1.74601	1.87327
755	0.304485	0.287712	0.166185	0.274048	0.361263	0.418941	1.64238	0.451	0.463	0.568	0.454	0.448	0.451	1.55416	1.43048	0.673517	1.38956	1.85631	2.13836	0.440933	0.358011	-0.395241	0.328984	0.618591	0.760041	6.51537	5.51968	1.22362	5.20837	9.29504	12.3343	1.59766	1.53278	1.05175	1.51069	1.74607	1.87404
754.5	0.304472	0.287689	0.166279	0.274287	0.361253	0.419094	1.64347	0.451	0.463	0.568	0.454	0.448	0.451	1.55409	1.43037	0.673898	1.39077	1.85626	2.13914	0.44089	0.357931	-0.394676	0.329856	0.618564	0.760406	6.52345	5.52612	1.22663	5.22437	9.30684	12.3596	1.59816	1.53322	1.05239	1.51185	1.74663	1.875
754	0.304404	0.287769	0.166201	0.274326	0.361221	0.419104	1.64456	0.451	0.463	0.568	0.454	0.448	0.451	1.55374	1.43077	0.673582	1.39097	1.8561	2.1392	0.440667	0.358209	-0.395145	0.329998	0.618475	0.76043	6.52918	5.53653	1.22711	5.23279	9.31754	12.3766	1.59851	1.53394	1.0525	1.51246	1.74713	1.87564
753.5	0.304339	0.28779	0.166059	0.27446	0.361188	0.418996	1.64565	0.451	0.463	0.568	0.454	0.448	0.451	1.55341	1.43087	0.673007	1.39165	1.85593	2.13864	0.440453	0.358282	-0.396	0.330487	0.618384	0.760172	6.53506	5.54469	1.22664	5.24486	9.32821	12.3867	1.59887	1.53451	1.0524	1.51333	1.74763	1.87602
753	0.304407	0.287445	0.165972	0.274479	0.361149	0.419158	1.64675	0.451	0.463	0.568	0.454	0.448	0.451	1.55376	1.42915	0.672654	1.39174	1.85573	2.13947	0.440677	0.357083	-0.396524	0.330556	0.618276	0.760559	6.54667	5.53875	1.22698	5.25255	9.33858	12.4127	1.59958	1.5341	1.05247	1.51388	1.74812	1.87701
752.5	0.304349	0.287739	0.166069	0.274335	0.361174	0.418993	1.64784	0.451	0.463	0.568	0.454	0.448	0.451	1.55346	1.43062	0.673047	1.39101	1.85585	2.13863	0.440486	0.358105	-0.39594	0.330031	0.618345	0.760165	6.55287	5.55746	1.23005	5.25402	9.35229	12.4194	1.59996	1.53539	1.05313	1.51399	1.74876	1.87726
752	0.304287	0.287531	0.165912	0.274492	0.360935	0.418837	1.64894	0.451	0.463	0.568	0.454	0.448	0.451	1.55315	1.42958	0.672411	1.39181	1.85463	2.13783	0.440282	0.357382	-0.396886	0.330603	0.617683	0.759793	6.55892	5.55681	1.22935	5.26703	9.35234	12.4267	1.60032	1.53535	1.05298	1.51493	1.74876	1.87754
751.5	0.304313	0.287616	0.165956	0.274639	0.361138	0.419094	1.65003	0.451	0.463	0.568	0.454	0.448	0.451	1.55328	1.43	0.672589	1.39255	1.85567	2.13914	0.440368	0.357678	-0.39662	0.331139	0.618245	0.760406	6.56877	5.5675	1.23164	5.27969	9.37533	12.4585	1.60093	1.53608	1.05347	1.51584	1.74983	1.87874
751	0.304386	0.287588	0.165725	0.274547	0.36115	0.419171	1.65113	0.451	0.463	0.568	0.454	0.448	0.451	1.55365	1.42987	0.671653	1.39209	1.85573	2.13954	0.440608	0.35758	-0.398013	0.330804	0.618278	0.76059	6.58067	5.57383	1.22985	5.28319	9.38844	12.4797	1.60165	1.53652	1.05308	1.51609	1.75044	1.87954
750.5	0.30439	0.287455	0.165692	0.274674	0.360871	0.41906	1.65223	0.451	0.463	0.568	0.454	0.448	0.451	1.55367	1.4292	0.671519	1.39273	1.8543	2.13897	0.440621	0.357118	-0.398212	0.331266	0.617506	0.760325	6.58962	5.5761	1.231	5.29512	9.38643	12.4897	1.60219	1.53668	1.05333	1.51694	1.75035	1.87991
750	0.304436	0.287683	0.165578	0.274839	0.360765	0.419204	1.65333	0.451	0.463	0.568	0.454	0.448	0.451	1.55391	1.43034	0.671057	1.39357	1.85375	2.13971	0.440772	0.35791	-0.398901	0.331867	0.617212	0.760669	6.6004	5.5924	1.23095	5.30856	9.39343	12.515	1.60285	1.5378	1.05332	1.5179	1.75068	1.88086
749.5	0.304439	0.287448	0.165558	0.274771	0.360659	0.418984	1.65444	0.451	0.463	0.568	0.454	0.448	0.451	1.55392	1.42917	0.670976	1.39322	1.85321	2.13858	0.440782	0.357093	-0.399022	0.331619	0.616918	0.760144	6.60934	5.59071	1.23229	5.31301	9.40044	12.5185	1.60339	1.53768	1.05361	1.51822	1.751	1.881
749	0.304348	0.287399	0.165448	0.275005	0.360508	0.419086	1.65554	0.451	0.463	0.568	0.454	0.448	0.451	1.55346	1.42893	0.67053	1.39441	1.85243	2.1391	0.440483	0.356923	-0.399686	0.33247	0.616499	0.760387	6.61421	5.59627	1.2323	5.32917	9.40512	12.5413	1.60369	1.53807	1.05361	1.51937	1.75122	1.88185
748.5	0.304305	0.287306	0.16555	0.275058	0.360489	0.419151	1.65665	0.451	0.463	0.568	0.454	0.448	0.451	1.55324	1.42846	0.670944	1.39468	1.85233	2.13944	0.440341	0.356599	-0.39907	0.332663	0.616447	0.760542	6.62118	5.60013	1.23547	5.33835	9.41669	12.562	1.60411	1.53833	1.05428	1.52003	1.75176	1.88263
748	0.304261	0.287427	0.165426	0.27527	0.360488	0.419049	1.65775	0.451	0.463	0.568	0.454	0.448	0.451	1.55301	1.42906	0.670441	1.39575	1.85233	2.13892	0.440197	0.35702	-0.399819	0.333434	0.616444	0.760299	6.62812	5.61234	1.23527	5.35374	9.42923	12.5727	1.60453	1.53917	1.05424	1.52112	1.75234	1.88303
747.5	0.304256	0.2873	0.165287	0.275177	0.360489	0.419307	1.65886	0.451	0.463	0.568	0.454	0.448	0.451	1.55299	1.42843	0.669878	1.39528	1.85233	2.14023	0.44018	0.356578	-0.40066	0.333096	0.616447	0.760914	6.63677	5.61489	1.23484	5.35728	9.4419	12.605	1.60505	1.53934	1.05415	1.52137	1.75293	1.88424
747	0.304248	0.287283	0.165347	0.275284	0.360478	0.419167	1.65997	0.451	0.463	0.568	0.454	0.448	0.451	1.55295	1.42835	0.670121	1.39582	1.85228	2.13952	0.440154	0.356519	-0.400297	0.333484	0.616416	0.76058	6.64531	5.62174	1.2374	5.36862	9.45397	12.6135	1.60557	1.53981	1.0547	1.52218	1.75349	1.88455
746.5	0.30429	0.287114	0.165183	0.275433	0.360553	0.419483	1.66109	0.451	0.463	0.568	0.454	0.448	0.451	1.55316	1.42751	0.669456	1.39658	1.85266	2.14113	0.440292	0.355931	-0.401289	0.334026	0.616624	0.761334	6.65605	5.62265	1.2366	5.38164	9.47058	12.6494	1.60622	1.53987	1.05453	1.5231	1.75426	1.88589
746	0.304233	0.287419	0.165307	0.275392	0.36055	0.419416	1.6622	0.451	0.463	0.568	0.454	0.448	0.451	1.55287	1.42902	0.669959	1.39637	1.85265	2.14079	0.440105	0.356992	-0.400539	0.333877	0.616616	0.761174	6.66248	5.64216	1.24012	5.38725	9.48312	12.6623	1.6066	1.54121	1.05527	1.5235	1.75484	1.88638
745.5	0.304285	0.287355	0.165259	0.275663	0.360584	0.419389	1.66331	0.451	0.463	0.568	0.454	0.448	0.451	1.55314	1.42871	0.669764	1.39774	1.85282	2.14065	0.440276	0.35677	-0.400829	0.33486	0.61671	0.76111	6.6737	5.64721	1.24106	5.4051	9.49764	12.6777	1.60728	1.54155	1.05548	1.52476	1.75551	1.88695
745	0.304241	0.287291	0.164941	0.275417	0.360279	0.419393	1.66443	0.451	0.463	0.568	0.454	0.448	0.451	1.55291	1.42839	0.668476	1.3965	1.85126	2.14067	0.440131	0.356547	-0.402755	0.333967	0.615864	0.761119	6.68073	5.65228	1.23795	5.4027	9.49431	12.6949	1.6077	1.5419	1.05481	1.52459	1.75536	1.88759
744.5	0.304216	0.28742	0.164936	0.275609	0.360278	0.419283	1.66555	0.451	0.463	0.568	0.454	0.448	0.451	1.55278	1.42903	0.668455	1.39747	1.85125	2.14011	0.440049	0.356996	-0.402786	0.334664	0.615861	0.760857	6.68861	5.66496	1.23954	5.41751	9.50701	12.7053	1.60818	1.54276	1.05515	1.52563	1.75595	1.88798
744	0.304189	0.287294	0.164892	0.275578	0.360272	0.419303	1.66667	0.451	0.463	0.568	0.454	0.448	0.451	1.55265	1.4284	0.668277	1.39731	1.85122	2.14021	0.43996	0.356557	-0.403052	0.334552	0.615844	0.760905	6.69641	5.6676	1.24054	5.42357	9.51948	12.7236	1.60865	1.54294	1.05536	1.52606	1.75652	1.88866
743.5	0.304245	0.287131	0.164761	0.275445	0.360175	0.419349	1.66779	0.451	0.463	0.568	0.454	0.448	0.451	1.55293	1.42759	0.667746	1.39664	1.85072	2.14045	0.440144	0.35599	-0.403847	0.334069	0.615575	0.761014	6.70789	5.66879	1.24024	5.42563	9.52715	12.7435	1.60934	1.54302	1.0553	1.5262	1.75687	1.88939
743	0.304183	0.286995	0.164803	0.275614	0.360103	0.419537	1.66891	0.451	0.463	0.568	0.454	0.448	0.451	1.55261	1.42692	0.667916	1.3975	1.85035	2.14141	0.43994	0.355516	-0.403592	0.334682	0.615375	0.761463	6.71418	5.67104	1.24254	5.4396	9.53617	12.7721	1.60971	1.54318	1.05579	1.52719	1.75729	1.89045
742.5	0.304172	0.287225	0.16475	0.275555	0.360269	0.419488	1.67003	0.451	0.463	0.568	0.454	0.448	0.451	1.55256	1.42806	0.667702	1.3972	1.8512	2.14116	0.439904	0.356317	-0.403914	0.334468	0.615836	0.761346	6.72274	5.68779	1.24341	5.4446	9.55782	12.7864	1.61023	1.54432	1.05598	1.52754	1.75829	1.89098
742	0.30415	0.287155	0.164564	0.275733	0.360082	0.419436	1.67116	0.451	0.463	0.568	0.454	0.448	0.451	1.55245	1.42771	0.666948	1.3981	1.85024	2.14089	0.439832	0.356073	-0.405044	0.335114	0.615317	0.761222	6.73083	5.69268	1.24228	5.45899	9.56077	12.8004	1.61071	1.54465	1.05573	1.52854	1.75842	1.8915
741.5	0.304209	0.28704	0.164503	0.275866	0.359937	0.419595	1.67229	0.451	0.463	0.568	0.454	0.448	0.451	1.55275	1.42714	0.666701	1.39877	1.8495	2.1417	0.440026	0.355673	-0.405414	0.335596	0.614914	0.761601	6.74253	5.6958	1.24303	5.47163	9.56596	12.8274	1.61141	1.54486	1.05589	1.52943	1.75866	1.8925
741	0.304236	0.287095	0.16452	0.275826	0.359929	0.419225	1.67341	0.451	0.463	0.568	0.454	0.448	0.451	1.55289	1.42741	0.666769	1.39857	1.84946	2.13981	0.440115	0.355864	-0.405311	0.335451	0.614892	0.760719	6.75283	5.70567	1.24497	5.47742	9.57845	12.8221	1.61202	1.54553	1.05631	1.52983	1.75923	1.8923
740.5	0.304208	0.287148	0.164492	0.275878	0.359873	0.419471	1.67454	0.451	0.463	0.568	0.454	0.448	0.451	1.55274	1.42768	0.666656	1.39884	1.84917	2.14107	0.440023	0.356049	-0.405481	0.33564	0.614736	0.761305	6.76071	5.71549	1.24623	5.48689	9.58841	12.8545	1.61249	1.54619	1.05657	1.53049	1.75969	1.89349
740	0.304075	0.286717	0.164069	0.275969	0.359596	0.419272	1.67568	0.451	0.463	0.568	0.454	0.448	0.451	1.55206	1.42553	0.664942	1.3993	1.84775	2.14005	0.439585	0.354547	-0.408056	0.33597	0.613966	0.760831	6.76393	5.70605	1.2415	5.49793	9.58659	12.8597	1.61269	1.54555	1.05557	1.53126	1.75961	1.89368
739.5	0.304018	0.286549	0.164188	0.275955	0.359687	0.419348	1.67681	0.451	0.463	0.568	0.454	0.448	0.451	1.55177	1.4247	0.665424	1.39923	1.84821	2.14044	0.439398	0.353961	-0.407331	0.335919	0.614219	0.761012	6.77054	5.70707	1.24498	5.50481	9.60442	12.8817	1.61308	1.54562	1.05631	1.53174	1.76043	1.89449
739	0.304061	0.286717	0.164223	0.276011	0.359699	0.418933	1.67794	0.451	0.463	0.568	0.454	0.448	0.451	1.55199	1.42553	0.665566	1.39951	1.84827	2.13832	0.439539	0.354547	-0.407118	0.336122	0.614253	0.760022	6.78162	5.7215	1.2472	5.5145	9.61806	12.8736	1.61374	1.5466	1.05678	1.53242	1.76105	1.8942
738.5	0.304113	0.286647	0.164207	0.276055	0.359619	0.419118	1.67908	0.451	0.463	0.568	0.454	0.448	0.451	1.55226	1.42519	0.665501	1.39973	1.84786	2.13927	0.43971	0.354303	-0.407215	0.336281	0.61403	0.760463	6.79313	5.72645	1.24865	5.52373	9.62681	12.9025	1.61442	1.54693	1.05709	1.53306	1.76145	1.89526
738	0.304059	0.286707	0.16408	0.275925	0.359635	0.419193	1.68022	0.451	0.463	0.568	0.454	0.448	0.451	1.55198	1.42548	0.664986	1.39907	1.84795	2.13965	0.439533	0.354512	-0.407989	0.33581	0.614075	0.760642	6.79992	5.73662	1.24841	5.52601	9.64071	12.9246	1.61483	1.54762	1.05703	1.53321	1.76209	1.89607
737.5	0.30409	0.286854	0.164098	0.275988	0.359475	0.419147	1.68136	0.451	0.463	0.568	0.454	0.448	0.451	1.55214	1.42622	0.665059	1.39939	1.84712	2.13942	0.439635	0.355025	-0.407879	0.336038	0.61363	0.760533	6.81053	5.75029	1.25037	5.53603	9.6452	12.9393	1.61546	1.54854	1.05745	1.53391	1.76229	1.89661
737	0.304149	0.286804	0.163962	0.276139	0.359419	0.419405	1.6825	0.451	0.463	0.568	0.454	0.448	0.451	1.55244	1.42597	0.664508	1.40016	1.84684	2.14073	0.439829	0.35485	-0.408708	0.336585	0.613474	0.761148	6.82242	5.75609	1.25	5.54961	9.65528	12.9728	1.61616	1.54893	1.05737	1.53485	1.76275	1.89783
736.5	0.304117	0.286777	0.16393	0.276034	0.359507	0.419559	1.68364	0.451	0.463	0.568	0.454	0.448	0.451	1.55228	1.42583	0.664378	1.39963	1.84729	2.14152	0.439723	0.354756	-0.408904	0.336205	0.613719	0.761515	6.83025	5.76282	1.25121	5.55293	9.67313	12.9999	1.61662	1.54938	1.05763	1.53508	1.76357	1.89883
736	0.304067	0.286857	0.163893	0.276315	0.359313	0.419433	1.68478	0.451	0.463	0.568	0.454	0.448	0.451	1.55202	1.42623	0.664228	1.40105	1.84629	2.14088	0.439559	0.355035	-0.409129	0.337223	0.613179	0.761215	6.83729	5.77387	1.25234	5.5718	9.67583	13.0098	1.61704	1.55013	1.05787	1.53638	1.76369	1.89919
735.5	0.304054	0.286775	0.163907	0.276183	0.359297	0.419438	1.68593	0.451	0.463	0.568	0.454	0.448	0.451	1.55196	1.42582	0.664285	1.40038	1.84621	2.1409	0.439516	0.354749	-0.409044	0.336745	0.613134	0.761227	6.846	5.77842	1.25426	5.57405	9.68813	13.0278	1.61756	1.55043	1.05827	1.53654	1.76425	1.89984
735	0.304075	0.286691	0.163924	0.276176	0.359484	0.419516	1.68707	0.451	0.463	0.568	0.454	0.448	0.451	1.55206	1.42541	0.664354	1.40035	1.84717	2.1413	0.439585	0.354456	-0.40894	0.336719	0.613655	0.761413	6.85627	5.7829	1.25623	5.58135	9.71141	13.0504	1.61816	1.55073	1.05869	1.53704	1.76531	1.90067
734.5	0.304163	0.286889	0.163758	0.276234	0.35956	0.419579	1.68822	0.451	0.463	0.568	0.454	0.448	0.451	1.55251	1.42639	0.663681	1.40064	1.84756	2.14162	0.439875	0.355147	-0.409953	0.336929	0.613866	0.761563	6.86958	5.79877	1.25539	5.5913	9.72875	13.0721	1.61895	1.55179	1.05851	1.53772	1.7661	1.90146
734	0.304161	0.286603	0.163546	0.276136	0.359459	0.419641	1.68937	0.451	0.463	0.568	0.454	0.448	0.451	1.5525	1.42497	0.662822	1.40014	1.84704	2.14194	0.439868	0.354149	-0.411249	0.336575	0.613585	0.761711	6.87885	5.79511	1.25385	5.59495	9.73654	13.0938	1.61949	1.55155	1.05818	1.53797	1.76645	1.90224
733.5	0.304148	0.286756	0.163702	0.276282	0.359344	0.419351	1.69052	0.451	0.463	0.568	0.454	0.448	0.451	1.55244	1.42573	0.663454	1.40088	1.84645	2.14046	0.439825	0.354683	-0.410295	0.337103	0.613265	0.761019	6.88764	5.80921	1.25795	5.60851	9.74358	13.0935	1.62001	1.55249	1.05905	1.53891	1.76677	1.90223
733	0.304133	0.28658	0.163529	0.276437	0.359217	0.419605	1.69168	0.451	0.463	0.568	0.454	0.448	0.451	1.55236	1.42485	0.662753	1.40167	1.8458	2.14175	0.439776	0.354069	-0.411353	0.337664	0.612912	0.761625	6.89636	5.81	1.25701	5.62246	9.74998	13.1273	1.62052	1.55254	1.05885	1.53986	1.76706	1.90346
732.5	0.304098	0.286549	0.163561	0.276331	0.359508	0.419708	1.69283	0.451	0.463	0.568	0.454	0.448	0.451	1.55218	1.4247	0.662883	1.40113	1.84729	2.14228	0.439661	0.353961	-0.411157	0.337281	0.613722	0.76187	6.90419	5.81667	1.25922	5.62583	9.77912	13.1516	1.62098	1.55299	1.05932	1.54009	1.76838	1.90434
732	0.304046	0.28674	0.163404	0.276587	0.359313	0.419652	1.69399	0.451	0.463	0.568	0.454	0.448	0.451	1.55192	1.42565	0.662246	1.40243	1.84629	2.14199	0.43949	0.354627	-0.412117	0.338207	0.613179	0.761737	6.91126	5.83239	1.25852	5.64396	9.78187	13.1661	1.6214	1.55404	1.05917	1.54133	1.7685	1.90487
731.5	0.304016	0.286726	0.163404	0.276609	0.35922	0.419618	1.69515	0.451	0.463	0.568	0.454	0.448	0.451	1.55176	1.42558	0.662246	1.40254	1.84581	2.14182	0.439391	0.354578	-0.412117	0.338286	0.61292	0.761656	6.91935	5.83979	1.26024	5.65257	9.79017	13.182	1.62187	1.55453	1.05953	1.54192	1.76888	1.90544
731	0.304003	0.286655	0.163208	0.276584	0.358995	0.419541	1.69631	0.451	0.463	0.568	0.454	0.448	0.451	1.5517	1.42523	0.661452	1.40241	1.84466	2.14143	0.439349	0.354331	-0.413318	0.338196	0.612294	0.761472	6.92822	5.84489	1.25894	5.65929	9.79129	13.1952	1.62239	1.55487	1.05926	1.54238	1.76893	1.90592
730.5	0.303997	0.286583	0.163231	0.27659	0.359183	0.419378	1.69747	0.451	0.463	0.568	0.454	0.448	0.451	1.55167	1.42487	0.661545	1.40245	1.84562	2.14059	0.439329	0.354079	-0.413177	0.338217	0.612817	0.761084	6.93744	5.84995	1.26102	5.66728	9.81497	13.203	1.62293	1.55521	1.05969	1.54292	1.77	1.9062
730	0.304017	0.28667	0.163207	0.276547	0.359107	0.419473	1.69863	0.451	0.463	0.568	0.454	0.448	0.451	1.55177	1.4253	0.661448	1.40223	1.84523	2.14108	0.439395	0.354383	-0.413324	0.338062	0.612605	0.76131	6.94786	5.86153	1.26238	5.67328	9.82426	13.2271	1.62354	1.55598	1.05998	1.54333	1.77041	1.90707
729.5	0.304017	0.286715	0.163162	0.276742	0.359059	0.419528	1.69979	0.451	0.463	0.568	0.454	0.448	0.451	1.55177	1.42552	0.661266	1.40322	1.84499	2.14136	0.439395	0.35454	-0.4136	0.338767	0.612472	0.761441	6.95739	5.87141	1.26341	5.68908	9.83511	13.2487	1.6241	1.55663	1.0602	1.5444	1.7709	1.90784
729	0.304027	0.286539	0.163104	0.276857	0.358947	0.419475	1.70096	0.451	0.463	0.568	0.454	0.448	0.451	1.55182	1.42465	0.661031	1.4038	1.84441	2.14109	0.439427	0.353926	-0.413955	0.339182	0.61216	0.761315	6.96739	5.87225	1.26425	5.70162	9.84246	13.2635	1.62468	1.55669	1.06037	1.54525	1.77123	1.90838
728.5	0.303976	0.286534	0.162945	0.276861	0.358772	0.419705	1.70213	0.451	0.463	0.568	0.454	0.448	0.451	1.55156	1.42462	0.660386	1.40382	1.84351	2.14226	0.43926	0.353908	-0.41493	0.339197	0.611672	0.761863	6.97462	5.88011	1.26351	5.70961	9.84637	13.2963	1.6251	1.55721	1.06022	1.54579	1.77141	1.90956
728	0.303989	0.286524	0.163031	0.276862	0.35888	0.419868	1.7033	0.451	0.463	0.568	0.454	0.448	0.451	1.55162	1.42458	0.660735	1.40382	1.84407	2.1431	0.439302	0.353874	-0.414403	0.3392	0.611973	0.762251	6.9848	5.88778	1.26659	5.7175	9.86583	13.3249	1.62569	1.55771	1.06086	1.54633	1.77228	1.91058
727.5	0.304088	0.286471	0.163161	0.277161	0.358886	0.419788	1.70447	0.451	0.463	0.568	0.454	0.448	0.451	1.55213	1.42431	0.661262	1.40534	1.8441	2.14269	0.439628	0.353689	-0.413606	0.34028	0.61199	0.762061	6.99896	5.89369	1.27035	5.73774	9.87973	13.3381	1.62652	1.55811	1.06165	1.54769	1.77291	1.91106
727	0.304067	0.286582	0.162949	0.27701	0.358863	0.419759	1.70564	0.451	0.463	0.568	0.454	0.448	0.451	1.55202	1.42486	0.660402	1.40457	1.84398	2.14254	0.439559	0.354076	-0.414906	0.339735	0.611926	0.761992	7.00762	5.90638	1.2688	5.73937	9.89206	13.3546	1.62702	1.55894	1.06132	1.5478	1.77346	1.91165
726.5	0.30401	0.286451	0.162786	0.277167	0.359077	0.419663	1.70681	0.451	0.463	0.568	0.454	0.448	0.451	1.55173	1.42421	0.659742	1.40537	1.84508	2.14205	0.439372	0.353619	-0.415907	0.340301	0.612522	0.761763	7.01464	5.9091	1.268	5.75379	9.91749	13.3669	1.62743	1.55912	1.06116	1.54878	1.7746	1.91209
726	0.303918	0.286415	0.162892	0.277291	0.358907	0.419863	1.70799	0.451	0.463	0.568	0.454	0.448	0.451	1.55126	1.42403	0.660171	1.406	1.84421	2.14307	0.439069	0.353493	-0.415256	0.340749	0.612048	0.762239	7.02006	5.91576	1.2714	5.76688	9.92176	13.3981	1.62774	1.55956	1.06187	1.54966	1.77479	1.9132
725.5	0.303989	0.286556	0.162769	0.277348	0.358626	0.419869	1.70917	0.451	0.463	0.568	0.454	0.448	0.451	1.55162	1.42473	0.659673	1.40629	1.84276	2.1431	0.439302	0.353985	-0.416011	0.340954	0.611265	0.762254	7.03302	5.92975	1.27124	5.7772	9.91989	13.4169	1.62849	1.56048	1.06183	1.55035	1.77471	1.91387
725	0.303998	0.286634	0.162636	0.277549	0.358754	0.419812	1.71034	0.451	0.463	0.568	0.454	0.448	0.451	1.55167	1.42512	0.659134	1.40731	1.84342	2.14281	0.439332	0.354257	-0.416829	0.341679	0.611622	0.762118	7.04314	5.94116	1.27091	5.79356	9.94067	13.4318	1.62908	1.56123	1.06177	1.55145	1.77564	1.9144
724.5	0.304003	0.286388	0.1626	0.277604	0.35853	0.419658	1.71153	0.451	0.463	0.568	0.454	0.448	0.451	1.5517	1.4239	0.658988	1.40759	1.84227	2.14202	0.439349	0.353399	-0.41705	0.341877	0.610997	0.761751	7.0531	5.93916	1.2721	5.80386	9.94196	13.4405	1.62965	1.5611	1.06201	1.55213	1.77569	1.91471
724	0.30398	0.286538	0.162621	0.277471	0.358669	0.419792	1.71271	0.451	0.463	0.568	0.454	0.448	0.451	1.55158	1.42464	0.659073	1.40691	1.84298	2.14271	0.439273	0.353922	-0.416921	0.341398	0.611385	0.76207	7.06177	5.9536	1.27419	5.80631	9.96342	13.4677	1.63015	1.56205	1.06245	1.5523	1.77665	1.91568
723.5	0.303926	0.286406	0.162495	0.277424	0.358552	0.419892	1.71389	0.451	0.463	0.568	0.454	0.448	0.451	1.5513	1.42399	0.658562	1.40667	1.84238	2.14322	0.439095	0.353462	-0.417696	0.341228	0.611059	0.762309	7.06903	5.95634	1.27397	5.81237	9.97069	13.4927	1.63057	1.56223	1.0624	1.5527	1.77697	1.91657
723	0.303932	0.286282	0.162474	0.277491	0.3585	0.419822	1.71508	0.451	0.463	0.568	0.454	0.448	0.451	1.55133	1.42337	0.658477	1.40701	1.84211	2.14286	0.439115	0.353029	-0.417825	0.34147	0.610914	0.762142	7.07909	5.95941	1.27541	5.82322	9.98159	13.5069	1.63115	1.56243	1.0627	1.55343	1.77746	1.91707
722.5	0.303961	0.286344	0.162449	0.277562	0.358386	0.419744	1.71626	0.451	0.463	0.568	0.454	0.448	0.451	1.55148	1.42368	0.658376	1.40737	1.84153	2.14246	0.43921	0.353245	-0.417979	0.341725	0.610596	0.761956	7.09024	5.97025	1.27678	5.83427	9.98905	13.5205	1.63179	1.56314	1.06299	1.55416	1.77779	1.91756
722	0.30395	0.286267	0.162144	0.277607	0.358545	0.419596	1.71745	0.451	0.463	0.568	0.454	0.448	0.451	1.55143	1.4233	0.65714	1.4076	1.84235	2.14171	0.439174	0.352976	-0.419858	0.341888	0.611039	0.761603	7.09955	5.97531	1.27375	5.84425	10.0118	13.5297	1.63233	1.56347	1.06236	1.55483	1.7788	1.91788
721.5	0.303891	0.286343	0.162322	0.277675	0.358212	0.419629	1.71864	0.451	0.463	0.568	0.454	0.448	0.451	1.55112	1.42368	0.657861	1.40795	1.84063	2.14188	0.43898	0.353242	-0.418761	0.342132	0.61011	0.761682	7.10663	5.98677	1.27832	5.85522	10.007	13.5506	1.63274	1.56422	1.06331	1.55556	1.77859	1.91862
721	0.303931	0.286171	0.162223	0.277617	0.358374	0.419756	1.71983	0.451	0.463	0.568	0.454	0.448	0.451	1.55133	1.42282	0.65746	1.40765	1.84147	2.14252	0.439112	0.352641	-0.419371	0.341924	0.610562	0.761985	7.11837	5.98788	1.27853	5.86089	10.03	13.5776	1.63341	1.56429	1.06335	1.55593	1.77961	1.91958
720.5	0.303943	0.286244	0.162131	0.27771	0.358182	0.420106	1.72103	0.451	0.463	0.568	0.454	0.448	0.451	1.55139	1.42318	0.657087	1.40812	1.84048	2.14431	0.439151	0.352896	-0.419938	0.342259	0.610026	0.762818	7.12881	5.99925	1.27886	5.87296	10.0332	13.6192	1.63401	1.56504	1.06342	1.55673	1.77975	1.92105
720	0.303901	0.286257	0.162112	0.2779	0.358284	0.419977	1.72222	0.451	0.463	0.568	0.454	0.448	0.451	1.55118	1.42325	0.65701	1.40909	1.841	2.14365	0.439013	0.352941	-0.420056	0.342942	0.610311	0.762511	7.13675	6.00813	1.28033	5.88917	10.0528	13.6297	1.63446	1.56561	1.06373	1.55781	1.78062	1.92142
719.5	0.303885	0.286278	0.162218	0.277876	0.358306	0.420002	1.72342	0.451	0.463	0.568	0.454	0.448	0.451	1.55109	1.42335	0.65744	1.40897	1.84112	2.14378	0.43896	0.353015	-0.419402	0.342856	0.610372	0.76257	7.14592	6.01737	1.28379	5.89634	10.068	13.6503	1.63499	1.56622	1.06445	1.55828	1.7813	1.92214
719	0.303878	0.286235	0.162113	0.277789	0.358232	0.420025	1.72462	0.451	0.463	0.568	0.454	0.448	0.451	1.55106	1.42314	0.657014	1.40852	1.84074	2.1439	0.438937	0.352864	-0.420049	0.342543	0.610166	0.762625	7.15553	6.02393	1.28391	5.90085	10.0779	13.6708	1.63554	1.56664	1.06447	1.55858	1.78173	1.92286
718.5	0.303906	0.286198	0.161926	0.278256	0.358146	0.419797	1.72582	0.451	0.463	0.568	0.454	0.448	0.451	1.5512	1.42295	0.656256	1.41089	1.84029	2.14273	0.439029	0.352735	-0.421204	0.344223	0.609926	0.762082	7.16681	6.03075	1.28274	5.92895	10.0871	13.675	1.63618	1.56709	1.06423	1.56043	1.78214	1.92301
718	0.303923	0.286182	0.161807	0.278246	0.358237	0.419927	1.72702	0.451	0.463	0.568	0.454	0.448	0.451	1.55129	1.42287	0.655774	1.41084	1.84076	2.1434	0.439085	0.352679	-0.421939	0.344187	0.61018	0.762392	7.1776	6.03848	1.28263	5.93678	10.1062	13.7025	1.6368	1.56759	1.06421	1.56095	1.78298	1.92398
717.5	0.303967	0.286094	0.161868	0.278307	0.358436	0.419996	1.72822	0.451	0.463	0.568	0.454	0.448	0.451	1.55151	1.42244	0.656021	1.41115	1.84178	2.14375	0.43923	0.352372	-0.421562	0.344406	0.610735	0.762556	7.18969	6.04318	1.28539	5.94767	10.1316	13.7261	1.63749	1.56789	1.06478	1.56166	1.7841	1.92481
717	0.303973	0.286096	0.161913	0.278068	0.358165	0.419962	1.72943	0.451	0.463	0.568	0.454	0.448	0.451	1.55154	1.42245	0.656204	1.40994	1.84039	2.14358	0.43925	0.352379	-0.421284	0.343547	0.609979	0.762475	7.2	6.0517	1.2879	5.94574	10.1304	13.743	1.63807	1.56845	1.0653	1.56153	1.78405	1.9254
716.5	0.303929	0.286113	0.161762	0.278144	0.358036	0.420047	1.73064	0.451	0.463	0.568	0.454	0.448	0.451	1.55132	1.42253	0.655592	1.41032	1.83973	2.14401	0.439105	0.352438	-0.422217	0.34382	0.609619	0.762678	7.20797	6.06087	1.28729	5.9573	10.1372	13.7678	1.63853	1.56904	1.06517	1.56229	1.78435	1.92627
716	0.303894	0.286205	0.161633	0.278223	0.358328	0.419841	1.73184	0.451	0.463	0.568	0.454	0.448	0.451	1.55114	1.42299	0.655069	1.41073	1.84123	2.14296	0.43899	0.35276	-0.423015	0.344104	0.610434	0.762187	7.21638	6.07324	1.28704	5.96901	10.168	13.7735	1.639	1.56984	1.06512	1.56306	1.7857	1.92647
715.5	0.303985	0.286104	0.161603	0.278206	0.358163	0.420139	1.73305	0.451	0.463	0.568	0.454	0.448	0.451	1.5516	1.42249	0.654947	1.41064	1.84038	2.14448	0.439289	0.352407	-0.4232	0.344043	0.609973	0.762897	7.23079	6.07744	1.28836	5.97663	10.1728	13.8124	1.63982	1.57011	1.06539	1.56356	1.78591	1.92782
715	0.304022	0.286053	0.161604	0.278188	0.35807	0.420293	1.73427	0.451	0.463	0.568	0.454	0.448	0.451	1.55179	1.42223	0.654951	1.41055	1.8399	2.14526	0.439411	0.352228	-0.423194	0.343978	0.609714	0.763263	7.24267	6.08377	1.29018	5.98421	10.1817	13.8418	1.64049	1.57052	1.06577	1.56405	1.7863	1.92885
714.5	0.303926	0.285882	0.161567	0.278389	0.358082	0.420173	1.73548	0.451	0.463	0.568	0.454	0.448	0.451	1.5513	1.42138	0.654801	1.41157	1.83997	2.14465	0.439095	0.35163	-0.423423	0.344701	0.609747	0.762978	7.24823	6.08501	1.29139	6.00125	10.1967	13.8533	1.64081	1.5706	1.06602	1.56517	1.78696	1.92925
714	0.303956	0.286152	0.161684	0.278415	0.357915	0.420203	1.73669	0.451	0.463	0.568	0.454	0.448	0.451	1.55146	1.42273	0.655276	1.4117	1.83911	2.14481	0.439194	0.352574	-0.422699	0.344794	0.609281	0.763049	7.25982	6.10505	1.29508	6.01078	10.2014	13.8747	1.64146	1.57189	1.06678	1.56579	1.78717	1.92999
713.5	0.304017	0.286066	0.161562	0.27846	0.358045	0.420046	1.73791	0.451	0.463	0.568	0.454	0.448	0.451	1.55177	1.4223	0.654781	1.41193	1.83978	2.144	0.439395	0.352274	-0.423454	0.344956	0.609644	0.762675	7.27292	6.10993	1.29493	6.02116	10.2232	13.8837	1.6422	1.5722	1.06675	1.56646	1.78812	1.93031
713	0.304018	0.285955	0.161536	0.278499	0.357977	0.420048	1.73913	0.451	0.463	0.568	0.454	0.448	0.451	1.55177	1.42175	0.654676	1.41212	1.83943	2.14401	0.439398	0.351886	-0.423615	0.345096	0.609454	0.76268	7.28317	6.11376	1.29633	6.03129	10.2336	13.9034	1.64278	1.57245	1.06704	1.56712	1.78858	1.93099
712.5	0.303982	0.285877	0.161355	0.278601	0.357938	0.420198	1.74035	0.451	0.463	0.568	0.454	0.448	0.451	1.55159	1.42136	0.653942	1.41264	1.83923	2.14478	0.439279	0.351613	-0.424736	0.345462	0.609345	0.763037	7.29167	6.119	1.29525	6.04419	10.2458	13.9328	1.64326	1.57279	1.06681	1.56796	1.78911	1.93201
712	0.303925	0.286054	0.161441	0.278476	0.357949	0.420081	1.74157	0.451	0.463	0.568	0.454	0.448	0.451	1.5513	1.42224	0.654291	1.41201	1.83928	2.14418	0.439092	0.352232	-0.424203	0.345013	0.609376	0.762759	7.29918	6.13519	1.29845	6.04725	10.2608	13.9446	1.64368	1.57383	1.06747	1.56816	1.78976	1.93242
711.5	0.30395	0.285898	0.161414	0.278587	0.357786	0.420149	1.7428	0.451	0.463	0.568	0.454	0.448	0.451	1.55143	1.42146	0.654181	1.41257	1.83845	2.14453	0.439174	0.351686	-0.424371	0.345412	0.60892	0.76292	7.31064	6.13712	1.29984	6.06058	10.2658	13.9688	1.64433	1.57395	1.06776	1.56902	1.78998	1.93326
711	0.304033	0.285917	0.161307	0.27862	0.357767	0.420009	1.74402	0.451	0.463	0.568	0.454	0.448	0.451	1.55185	1.42156	0.653748	1.41274	1.83835	2.14382	0.439447	0.351753	-0.425034	0.34553	0.608867	0.762587	7.32492	6.14657	1.29994	6.07054	10.2792	13.9791	1.64513	1.57456	1.06778	1.56966	1.79056	1.93361
710.5	0.304008	0.2859	0.161181	0.27865	0.357807	0.420226	1.74525	0.451	0.463	0.568	0.454	0.448	0.451	1.55172	1.42147	0.653237	1.41289	1.83855	2.14492	0.439365	0.351693	-0.425815	0.345638	0.608979	0.763104	7.33403	6.15449	1.29974	6.0804	10.296	14.0132	1.64564	1.57506	1.06774	1.5703	1.79129	1.93479
710	0.303956	0.285936	0.161089	0.278781	0.357647	0.420279	1.74648	0.451	0.463	0.568	0.454	0.448	0.451	1.55146	1.42165	0.652864	1.41355	1.83773	2.14519	0.439194	0.351819	-0.426386	0.346108	0.608532	0.76323	7.34185	6.16472	1.30009	6.09469	10.3013	14.0365	1.64608	1.57572	1.06781	1.57122	1.79152	1.9356
709.5	0.303996	0.285902	0.161056	0.278822	0.357833	0.420335	1.74771	0.451	0.463	0.568	0.454	0.448	0.451	1.55166	1.42148	0.65273	1.41376	1.83869	2.14548	0.439326	0.3517	-0.426591	0.346255	0.609051	0.763363	7.35414	6.17194	1.30139	6.10508	10.3265	14.0601	1.64677	1.57618	1.06807	1.57189	1.79262	1.93641
709	0.303989	0.28588	0.161095	0.278925	0.35765	0.420252	1.74894	0.451	0.463	0.568	0.454	0.448	0.451	1.55162	1.42137	0.652889	1.41428	1.83775	2.14506	0.439302	0.351623	-0.426349	0.346624	0.60854	0.763166	7.36418	6.1797	1.30385	6.11821	10.3305	14.0743	1.64733	1.57667	1.06858	1.57274	1.79279	1.9369
708.5	0.30404	0.2859	0.161011	0.278807	0.35752	0.420201	1.75018	0.451	0.463	0.568	0.454	0.448	0.451	1.55188	1.42147	0.652548	1.41369	1.83708	2.1448	0.43947	0.351693	-0.42687	0.346201	0.608176	0.763044	7.37705	6.18929	1.30433	6.12167	10.3376	14.0908	1.64805	1.57728	1.06868	1.57296	1.7931	1.93746
708	0.304021	0.285941	0.160854	0.278809	0.357473	0.420326	1.75141	0.451	0.463	0.568	0.454	0.448	0.451	1.55179	1.42168	0.651912	1.4137	1.83684	2.14543	0.439408	0.351837	-0.427846	0.346208	0.608045	0.763342	7.38655	6.19981	1.30363	6.13041	10.3495	14.1191	1.64858	1.57795	1.06853	1.57352	1.79362	1.93844
707.5	0.303979	0.285798	0.160934	0.278839	0.357546	0.420413	1.75265	0.451	0.463	0.568	0.454	0.448	0.451	1.55157	1.42097	0.652236	1.41385	1.83721	2.14588	0.43927	0.351337	-0.427349	0.346316	0.608249	0.763549	7.39495	6.20237	1.30677	6.1404	10.3683	14.1449	1.64905	1.57812	1.06918	1.57416	1.79443	1.93932
707	0.303955	0.285918	0.1608	0.278904	0.357628	0.420515	1.75389	0.451	0.463	0.568	0.454	0.448	0.451	1.55145	1.42156	0.651693	1.41418	1.83763	2.1464	0.439191	0.351756	-0.428182	0.346549	0.608478	0.763791	7.40424	6.21636	1.30644	6.15195	10.3878	14.1718	1.64957	1.57901	1.06911	1.5749	1.79527	1.94024
706.5	0.304011	0.285906	0.160874	0.278857	0.357373	0.420435	1.75513	0.451	0.463	0.568	0.454	0.448	0.451	1.55174	1.4215	0.651993	1.41394	1.83632	2.14599	0.439375	0.351714	-0.427722	0.34638	0.607765	0.763601	7.41746	6.22464	1.3095	6.15859	10.3876	14.1865	1.6503	1.57953	1.06973	1.57533	1.79527	1.94075
706	0.30395	0.285669	0.160878	0.278976	0.357449	0.420502	1.75637	0.451	0.463	0.568	0.454	0.448	0.451	1.55143	1.42032	0.652009	1.41454	1.83671	2.14633	0.439174	0.350885	-0.427697	0.346807	0.607978	0.76376	7.42499	6.22313	1.31142	6.17258	10.4068	14.2111	1.65072	1.57944	1.07013	1.57622	1.79609	1.94159
705.5	0.303931	0.285776	0.16077	0.279098	0.357407	0.420425	1.75762	0.451	0.463	0.568	0.454	0.448	0.451	1.55133	1.42086	0.651571	1.41516	1.8365	2.14594	0.439112	0.35126	-0.428368	0.347244	0.60786	0.763577	7.43459	6.23662	1.31152	6.18674	10.4191	14.226	1.65126	1.58029	1.07015	1.57712	1.79663	1.9421
705	0.303932	0.285581	0.160778	0.278948	0.357224	0.420559	1.75887	0.451	0.463	0.568	0.454	0.448	0.451	1.55133	1.41989	0.651604	1.4144	1.83556	2.14662	0.439115	0.350577	-0.428319	0.346706	0.607348	0.763896	7.44519	6.23695	1.31351	6.18886	10.4232	14.2553	1.65184	1.58031	1.07055	1.57726	1.7968	1.9431
704.5	0.304	0.285596	0.160592	0.278912	0.357291	0.420415	1.76011	0.451	0.463	0.568	0.454	0.448	0.451	1.55168	1.41996	0.65085	1.41422	1.8359	2.14589	0.439339	0.350629	-0.429476	0.346577	0.607536	0.763553	7.45909	6.24646	1.31233	6.19605	10.4419	14.2658	1.65261	1.58092	1.07031	1.57772	1.79761	1.94345
704	0.304071	0.28561	0.160625	0.279098	0.357251	0.420607	1.76136	0.451	0.463	0.568	0.454	0.448	0.451	1.55204	1.42003	0.650984	1.41516	1.8357	2.14687	0.439572	0.350679	-0.429271	0.347244	0.607424	0.76401	7.47318	6.25595	1.31474	6.21313	10.4544	14.2991	1.65339	1.58152	1.0708	1.5788	1.79815	1.94459
703.5	0.304001	0.285587	0.160581	0.278951	0.357035	0.420532	1.76262	0.451	0.463	0.568	0.454	0.448	0.451	1.55169	1.41992	0.650805	1.41442	1.83459	2.14648	0.439342	0.350598	-0.429545	0.346717	0.606819	0.763832	7.48036	6.26384	1.31588	6.21541	10.4566	14.3143	1.65379	1.58201	1.07104	1.57895	1.79824	1.9451
703	0.303945	0.285587	0.160505	0.278918	0.357182	0.420579	1.76387	0.451	0.463	0.568	0.454	0.448	0.451	1.5514	1.41992	0.650497	1.41425	1.83534	2.14672	0.439158	0.350598	-0.430018	0.346599	0.607231	0.763943	7.48825	6.27275	1.31651	6.22278	10.4801	14.3379	1.65423	1.58258	1.07116	1.57941	1.79925	1.9459
702.5	0.303931	0.285606	0.160477	0.278918	0.357212	0.420497	1.76512	0.451	0.463	0.568	0.454	0.448	0.451	1.55133	1.42001	0.650384	1.41425	1.8355	2.14631	0.439112	0.350664	-0.430192	0.346599	0.607315	0.763748	7.49822	6.28252	1.31792	6.23165	10.4968	14.3527	1.65478	1.58319	1.07145	1.57998	1.79997	1.94641
702	0.303907	0.28552	0.160344	0.279057	0.357075	0.420567	1.76638	0.451	0.463	0.568	0.454	0.448	0.451	1.55121	1.41958	0.649845	1.41495	1.83479	2.14666	0.439033	0.350363	-0.431022	0.347097	0.606931	0.763915	7.50772	6.28769	1.31762	6.24675	10.5037	14.378	1.6553	1.58352	1.07139	1.58093	1.80026	1.94726
701.5	0.303893	0.285448	0.160343	0.278811	0.357048	0.420545	1.76764	0.451	0.463	0.568	0.454	0.448	0.451	1.55113	1.41923	0.649841	1.41371	1.83465	2.14655	0.438987	0.350111	-0.431028	0.346215	0.606855	0.763862	7.51773	6.29348	1.31948	6.24463	10.5171	14.397	1.65585	1.58388	1.07177	1.5808	1.80084	1.9479
701	0.303915	0.285381	0.160461	0.278975	0.356929	0.420572	1.7689	0.451	0.463	0.568	0.454	0.448	0.451	1.55125	1.41889	0.650319	1.41454	1.83404	2.14669	0.439059	0.349876	-0.430292	0.346803	0.606522	0.763927	7.52955	6.2995	1.32331	6.2609	10.5251	14.4193	1.6565	1.58426	1.07254	1.58183	1.80118	1.94866
700.5	0.303969	0.285492	0.160455	0.278966	0.356831	0.420704	1.77016	0.451	0.463	0.568	0.454	0.448	0.451	1.55152	1.41944	0.650295	1.41449	1.83354	2.14736	0.439237	0.350265	-0.43033	0.346771	0.606247	0.76424	7.54298	6.3134	1.3251	6.26944	10.5343	14.449	1.65724	1.58513	1.07291	1.58237	1.80157	1.94966
700	0.30401	0.285474	0.16016	0.279044	0.356714	0.420806	1.77143	0.451	0.463	0.568	0.454	0.448	0.451	1.55173	1.41935	0.649099	1.41489	1.83294	2.14788	0.439372	0.350202	-0.43217	0.347051	0.605919	0.764483	7.5558	6.32163	1.32212	6.28191	10.5425	14.4767	1.65795	1.58565	1.0723	1.58315	1.80192	1.9506
699.5	0.303969	0.285375	0.160156	0.278916	0.356689	0.420621	1.77269	0.451	0.463	0.568	0.454	0.448	0.451	1.55152	1.41886	0.649083	1.41424	1.83281	2.14694	0.439237	0.349855	-0.432195	0.346592	0.605849	0.764043	7.56457	6.32628	1.32394	6.28512	10.5561	14.4846	1.65843	1.58594	1.07267	1.58336	1.8025	1.95086
699	0.30392	0.285272	0.160036	0.278769	0.356675	0.420609	1.77396	0.451	0.463	0.568	0.454	0.448	0.451	1.55127	1.41835	0.648597	1.41349	1.83274	2.14688	0.439075	0.349494	-0.432944	0.346065	0.60581	0.764015	7.57295	6.33076	1.32385	6.28748	10.5703	14.5045	1.65889	1.58622	1.07265	1.5835	1.80311	1.95153
698.5	0.303836	0.285333	0.160027	0.278697	0.356748	0.420653	1.77523	0.451	0.463	0.568	0.454	0.448	0.451	1.55084	1.41865	0.64856	1.41313	1.83311	2.1471	0.438799	0.349708	-0.433001	0.345806	0.606015	0.764119	7.5796	6.34254	1.3256	6.29324	10.5898	14.5283	1.65925	1.58696	1.07301	1.58387	1.80394	1.95233
698	0.303857	0.285293	0.159975	0.278784	0.356529	0.420789	1.7765	0.451	0.463	0.568	0.454	0.448	0.451	1.55095	1.41845	0.648349	1.41357	1.83199	2.1478	0.438868	0.349568	-0.433326	0.346118	0.605401	0.764442	7.59152	6.34985	1.32663	6.30619	10.592	14.5586	1.6599	1.58742	1.07322	1.58468	1.80403	1.95335
697.5	0.303944	0.285291	0.160008	0.278952	0.356389	0.420671	1.77778	0.451	0.463	0.568	0.454	0.448	0.451	1.55139	1.41844	0.648483	1.41442	1.83127	2.14719	0.439154	0.349561	-0.433119	0.346721	0.605008	0.764162	7.60676	6.35887	1.32908	6.32285	10.5988	14.5713	1.66073	1.58798	1.07371	1.58573	1.80432	1.95377
697	0.303975	0.285357	0.159805	0.278918	0.356156	0.42057	1.77905	0.451	0.463	0.568	0.454	0.448	0.451	1.55155	1.41877	0.64766	1.41425	1.83007	2.14668	0.439256	0.349792	-0.434389	0.346599	0.604354	0.763922	7.61923	6.37094	1.32762	6.33038	10.6002	14.5852	1.66141	1.58873	1.07342	1.5862	1.80438	1.95424
696.5	0.303953	0.285177	0.159654	0.278922	0.356129	0.420655	1.78033	0.451	0.463	0.568	0.454	0.448	0.451	1.55144	1.41788	0.647048	1.41427	1.82993	2.14711	0.439184	0.349161	-0.435334	0.346613	0.604278	0.764124	7.62907	6.37204	1.32701	6.33965	10.6138	14.612	1.66195	1.5888	1.07329	1.58678	1.80496	1.95514
696	0.304023	0.285039	0.159879	0.278818	0.356084	0.420567	1.78161	0.451	0.463	0.568	0.454	0.448	0.451	1.5518	1.41719	0.64796	1.41374	1.8297	2.14666	0.439414	0.348677	-0.433926	0.34624	0.604152	0.763915	7.64355	6.37503	1.33267	6.34403	10.6264	14.6269	1.66274	1.58899	1.07444	1.58705	1.80549	1.95564
695.5	0.30402	0.28506	0.159826	0.278798	0.356011	0.420531	1.78289	0.451	0.463	0.568	0.454	0.448	0.451	1.55178	1.4173	0.647746	1.41364	1.82932	2.14648	0.439404	0.348751	-0.434257	0.346169	0.603947	0.763829	7.6544	6.38514	1.3337	6.35225	10.6373	14.6454	1.66333	1.58962	1.07464	1.58757	1.80596	1.95626
695	0.303814	0.284983	0.159563	0.278799	0.355805	0.420517	1.78417	0.451	0.463	0.568	0.454	0.448	0.451	1.55073	1.41691	0.64668	1.41365	1.82827	2.14641	0.438727	0.348481	-0.435904	0.346172	0.603368	0.763796	7.65503	6.39088	1.33123	6.36144	10.6403	14.6656	1.66336	1.58997	1.07415	1.58814	1.80608	1.95693
694.5	0.303756	0.284903	0.15956	0.278775	0.355598	0.420489	1.78546	0.451	0.463	0.568	0.454	0.448	0.451	1.55044	1.41652	0.646667	1.41352	1.8272	2.14627	0.438536	0.3482	-0.435923	0.346086	0.602786	0.763729	7.66313	6.39649	1.33309	6.3695	10.6432	14.6847	1.6638	1.59032	1.07452	1.58864	1.80621	1.95757
694	0.303747	0.284835	0.159427	0.278578	0.355394	0.420465	1.78674	0.451	0.463	0.568	0.454	0.448	0.451	1.55039	1.41618	0.646128	1.41253	1.82615	2.14614	0.438506	0.347961	-0.436757	0.345379	0.602212	0.763672	7.67372	6.40265	1.33279	6.36967	10.6463	14.7042	1.66438	1.59071	1.07446	1.58865	1.80634	1.95822
693.5	0.303792	0.284806	0.159245	0.278535	0.355318	0.420419	1.78803	0.451	0.463	0.568	0.454	0.448	0.451	1.55062	1.41603	0.645391	1.41231	1.82576	2.14591	0.438654	0.34786	-0.437899	0.345225	0.601998	0.763563	7.68707	6.41058	1.33167	6.37689	10.6571	14.7222	1.6651	1.5912	1.07423	1.5891	1.8068	1.95881
693	0.303824	0.28475	0.159334	0.278491	0.355292	0.42038	1.78932	0.451	0.463	0.568	0.454	0.448	0.451	1.55078	1.41575	0.645752	1.41208	1.82563	2.14571	0.43876	0.347663	-0.43734	0.345067	0.601925	0.76347	7.69979	6.41731	1.33508	6.38408	10.6709	14.7407	1.66579	1.59162	1.07492	1.58955	1.80738	1.95943
692.5	0.303869	0.2846	0.159201	0.278375	0.355317	0.420397	1.79061	0.451	0.463	0.568	0.454	0.448	0.451	1.55101	1.41501	0.645213	1.4115	1.82576	2.1458	0.438908	0.347136	-0.438176	0.34465	0.601995	0.76351	7.71319	6.41981	1.33478	6.38797	10.6879	14.7632	1.66651	1.59177	1.07486	1.58979	1.8081	1.96018
692	0.303984	0.28458	0.159099	0.278473	0.355315	0.42035	1.79191	0.451	0.463	0.568	0.454	0.448	0.451	1.5516	1.41491	0.644799	1.41199	1.82575	2.14556	0.439286	0.347066	-0.438816	0.345002	0.60199	0.763399	7.73019	6.42819	1.335	6.40171	10.7032	14.7812	1.66743	1.59229	1.0749	1.59065	1.80875	1.96077
691.5	0.304106	0.284621	0.159137	0.27844	0.355228	0.420403	1.7932	0.451	0.463	0.568	0.454	0.448	0.451	1.55222	1.41511	0.644953	1.41183	1.8253	2.14583	0.439687	0.34721	-0.438578	0.344884	0.601745	0.763525	7.74759	6.43934	1.33757	6.40946	10.7134	14.8064	1.66837	1.59298	1.07542	1.59113	1.80918	1.96161
691	0.304187	0.284757	0.159098	0.278452	0.355311	0.420284	1.7945	0.451	0.463	0.568	0.454	0.448	0.451	1.55264	1.41579	0.644795	1.41189	1.82573	2.14522	0.439954	0.347687	-0.438823	0.344927	0.601979	0.763242	7.76294	6.45483	1.33885	6.41929	10.7339	14.8194	1.66919	1.59394	1.07568	1.59174	1.81005	1.96204
690.5	0.304446	0.284843	0.159175	0.278531	0.355353	0.420289	1.7958	0.451	0.463	0.568	0.454	0.448	0.451	1.55396	1.41622	0.645107	1.41229	1.82594	2.14524	0.440805	0.347989	-0.438339	0.34521	0.602097	0.763254	7.78743	6.46809	1.34208	6.43224	10.752	14.8412	1.67051	1.59475	1.07633	1.59254	1.81081	1.96276
690	0.304827	0.284966	0.159338	0.278804	0.355662	0.420264	1.7971	0.451	0.463	0.568	0.454	0.448	0.451	1.5559	1.41683	0.645768	1.41367	1.82753	2.14512	0.442055	0.348421	-0.437315	0.34619	0.602966	0.763194	7.81825	6.48306	1.34678	6.4542	10.7864	14.861	1.67216	1.59568	1.07727	1.5939	1.81225	1.96341
689.5	0.305132	0.285319	0.159491	0.27906	0.355816	0.420508	1.7984	0.451	0.463	0.568	0.454	0.448	0.451	1.55746	1.41858	0.646388	1.41497	1.82832	2.14636	0.443055	0.349659	-0.436356	0.347108	0.603399	0.763774	7.84527	6.50856	1.35133	6.47543	10.8114	14.8998	1.6736	1.59724	1.07818	1.59521	1.8133	1.9647
689	0.305577	0.285735	0.159735	0.279377	0.356343	0.420784	1.79971	0.451	0.463	0.568	0.454	0.448	0.451	1.55973	1.42065	0.647377	1.41658	1.83103	2.14777	0.444513	0.351116	-0.434827	0.348243	0.604879	0.764431	7.87959	6.53703	1.35744	6.49958	10.8592	14.941	1.67543	1.59899	1.07939	1.59669	1.8153	1.96605
688.5	0.306095	0.28598	0.159957	0.279626	0.356762	0.420853	1.80102	0.451	0.463	0.568	0.454	0.448	0.451	1.56237	1.42187	0.648276	1.41784	1.83318	2.14812	0.446206	0.351973	-0.433438	0.349134	0.606054	0.764595	7.91782	6.55776	1.36319	6.52063	10.9005	14.9677	1.67746	1.60025	1.08054	1.59798	1.81703	1.96693
688	0.306644	0.286838	0.160559	0.280251	0.357674	0.421089	1.80233	0.451	0.463	0.568	0.454	0.448	0.451	1.56518	1.42614	0.650716	1.42101	1.83787	2.14933	0.447998	0.354969	-0.429682	0.351367	0.608607	0.765155	7.9578	6.60676	1.37547	6.55933	10.9723	15.0062	1.67957	1.60323	1.08296	1.60035	1.82001	1.96819
687.5	0.307176	0.287395	0.160772	0.280599	0.358289	0.421129	1.80364	0.451	0.463	0.568	0.454	0.448	0.451	1.56789	1.42891	0.651579	1.42277	1.84103	2.14953	0.449732	0.356909	-0.428356	0.352608	0.610325	0.76525	7.99705	6.64209	1.38112	6.5852	11.026	15.0309	1.68164	1.60537	1.08407	1.60193	1.82224	1.969
687	0.307603	0.288297	0.161208	0.281213	0.359217	0.421405	1.80495	0.451	0.463	0.568	0.454	0.448	0.451	1.57007	1.43339	0.653347	1.42589	1.8458	2.15094	0.451121	0.360042	-0.425648	0.354794	0.612912	0.765905	8.03098	6.69359	1.39065	6.62368	11.0994	15.0726	1.68342	1.60848	1.08594	1.60426	1.82526	1.97037
686.5	0.307884	0.288782	0.161585	0.281697	0.359944	0.421482	1.80626	0.451	0.463	0.568	0.454	0.448	0.451	1.57151	1.4358	0.654874	1.42834	1.84953	2.15133	0.452034	0.361723	-0.423312	0.356513	0.614934	0.766088	8.05738	6.72591	1.3992	6.65619	11.1606	15.1	1.6848	1.61041	1.0876	1.60623	1.82777	1.97126
686	0.307909	0.289589	0.161959	0.282317	0.360458	0.421795	1.80758	0.451	0.463	0.568	0.454	0.448	0.451	1.57163	1.43981	0.65639	1.43148	1.85217	2.15293	0.452115	0.364514	-0.421	0.358712	0.616361	0.76683	8.07044	6.77342	1.40773	6.69527	11.2088	15.1445	1.68548	1.61325	1.08926	1.60858	1.82974	1.97271
685.5	0.307862	0.290048	0.162168	0.282802	0.361025	0.42206	1.8089	0.451	0.463	0.568	0.454	0.448	0.451	1.57139	1.4421	0.657237	1.43394	1.85509	2.15428	0.451963	0.366098	-0.41971	0.360428	0.617932	0.767458	8.07975	6.80482	1.41342	6.7281	11.2605	15.1857	1.68597	1.61512	1.09036	1.61055	1.83185	1.97405
685	0.307673	0.290338	0.162426	0.283406	0.361494	0.422184	1.81022	0.451	0.463	0.568	0.454	0.448	0.451	1.57043	1.44354	0.658283	1.43701	1.8575	2.15492	0.451349	0.367097	-0.418121	0.362562	0.619231	0.767752	8.08162	6.8284	1.42	6.76674	11.3063	15.2168	1.68607	1.61651	1.09162	1.61285	1.83371	1.97506
684.5	0.30732	0.290569	0.162507	0.283592	0.361763	0.422382	1.81154	0.451	0.463	0.568	0.454	0.448	0.451	1.56863	1.44469	0.658611	1.43795	1.85888	2.15593	0.450201	0.367892	-0.417622	0.363218	0.619974	0.768221	8.07487	6.84926	1.42349	6.78552	11.3396	15.2533	1.68571	1.61775	1.09229	1.61397	1.83506	1.97625
684	0.306931	0.290653	0.162282	0.283843	0.361859	0.422489	1.81287	0.451	0.463	0.568	0.454	0.448	0.451	1.56664	1.4451	0.657699	1.43922	1.85937	2.15647	0.448934	0.368181	-0.419008	0.364102	0.62024	0.768474	8.06622	6.86324	1.42163	6.80748	11.3623	15.2834	1.68526	1.61857	1.09193	1.61528	1.83597	1.97722
683.5	0.306484	0.290654	0.162294	0.283864	0.361845	0.422593	1.81419	0.451	0.463	0.568	0.454	0.448	0.451	1.56436	1.44511	0.657748	1.43933	1.8593	2.157	0.447477	0.368185	-0.418934	0.364176	0.620201	0.768721	8.05452	6.87334	1.42392	6.81845	11.378	15.3133	1.68465	1.61917	1.09237	1.61593	1.83661	1.97819
683	0.306105	0.290212	0.161972	0.283761	0.361315	0.422491	1.81552	0.451	0.463	0.568	0.454	0.448	0.451	1.56243	1.44291	0.656443	1.43881	1.85658	2.15648	0.446239	0.366663	-0.42092	0.363813	0.618735	0.768479	8.04638	6.86248	1.42035	6.82349	11.3613	15.3283	1.68422	1.61853	1.09169	1.61622	1.83593	1.97867
682.5	0.305686	0.289946	0.161751	0.283739	0.361102	0.422601	1.81685	0.451	0.463	0.568	0.454	0.448	0.451	1.56029	1.44159	0.655547	1.43869	1.85548	2.15705	0.444869	0.365746	-0.422285	0.363736	0.618146	0.768739	8.03613	6.85995	1.41855	6.83243	11.3646	15.3588	1.68369	1.61838	1.09134	1.61675	1.83607	1.97965
682	0.305258	0.289285	0.161331	0.283756	0.36052	0.4227	1.81818	0.451	0.463	0.568	0.454	0.448	0.451	1.5581	1.4383	0.653845	1.43878	1.85249	2.15755	0.443468	0.363464	-0.424885	0.363796	0.616533	0.768974	8.02539	6.83872	1.41327	6.84327	11.3446	15.3885	1.68313	1.61713	1.09033	1.61739	1.83526	1.98061
681.5	0.30494	0.289129	0.161081	0.283604	0.360301	0.422683	1.81952	0.451	0.463	0.568	0.454	0.448	0.451	1.55648	1.43753	0.652832	1.43801	1.85137	2.15746	0.442426	0.362924	-0.426436	0.36326	0.615925	0.768933	8.02044	6.84138	1.41096	6.84597	11.3474	15.4099	1.68287	1.61728	1.08988	1.61755	1.83537	1.9813
681	0.304632	0.288282	0.160694	0.283152	0.359547	0.422511	1.82085	0.451	0.463	0.568	0.454	0.448	0.451	1.55491	1.43332	0.651263	1.43572	1.84749	2.15659	0.441415	0.35999	-0.428841	0.361665	0.61383	0.768526	8.016	6.81134	1.40625	6.83419	11.3166	15.4199	1.68263	1.6155	1.08897	1.61686	1.83412	1.98162
680.5	0.303759	0.287816	0.160215	0.282948	0.359119	0.422334	1.82219	0.451	0.463	0.568	0.454	0.448	0.451	1.55045	1.431	0.649322	1.43468	1.84529	2.15568	0.438546	0.358373	-0.431826	0.360944	0.612639	0.768107	7.98184	6.79932	1.39993	6.83438	11.3062	15.4297	1.68084	1.61479	1.08774	1.61687	1.83371	1.98193
680	0.302441	0.286712	0.159555	0.282702	0.357864	0.422313	1.82353	0.451	0.463	0.568	0.454	0.448	0.451	1.54372	1.42551	0.646647	1.43344	1.83885	2.15558	0.434197	0.354529	-0.435954	0.360074	0.609138	0.768058	7.92436	6.75719	1.39047	6.83254	11.2439	15.4508	1.6778	1.61228	1.0859	1.61676	1.83117	1.98261
679.5	0.302089	0.286045	0.15929	0.282509	0.357212	0.422474	1.82487	0.451	0.463	0.568	0.454	0.448	0.451	1.54193	1.42219	0.645573	1.43246	1.8355	2.1564	0.433033	0.3522	-0.437617	0.359392	0.607315	0.768439	7.91757	6.73569	1.38789	6.83326	11.2194	15.4854	1.67744	1.611	1.0854	1.6168	1.83018	1.98372
679	0.302919	0.285375	0.158782	0.28235	0.356705	0.422113	1.82622	0.451	0.463	0.568	0.454	0.448	0.451	1.54616	1.41886	0.643514	1.43165	1.83289	2.15455	0.435776	0.349855	-0.440811	0.358829	0.605894	0.767584	7.97286	6.71405	1.38108	6.83563	11.2041	15.4817	1.68036	1.6097	1.08406	1.61694	1.82955	1.9836
678.5	0.303741	0.285008	0.158662	0.282209	0.356398	0.422037	1.82756	0.451	0.463	0.568	0.454	0.448	0.451	1.55036	1.41704	0.643028	1.43094	1.83131	2.15417	0.438486	0.348569	-0.441567	0.358329	0.605033	0.767404	8.02801	6.70666	1.38103	6.83887	11.2013	15.4989	1.68326	1.60926	1.08405	1.61713	1.82944	1.98415
678	0.303908	0.285307	0.158732	0.282348	0.356624	0.421941	1.82891	0.451	0.463	0.568	0.454	0.448	0.451	1.55121	1.41852	0.643312	1.43164	1.83247	2.15368	0.439036	0.349617	-0.441126	0.358821	0.605667	0.767176	8.0487	6.73066	1.38429	6.85571	11.2321	15.5148	1.68435	1.6107	1.08469	1.61813	1.83069	1.98466
677.5	0.303933	0.285532	0.158876	0.282523	0.356961	0.422032	1.83026	0.451	0.463	0.568	0.454	0.448	0.451	1.55134	1.41964	0.643895	1.43253	1.83421	2.15414	0.439118	0.350405	-0.440219	0.359441	0.606612	0.767392	8.06191	6.75123	1.38885	6.87434	11.2699	15.5444	1.68504	1.61193	1.08558	1.61923	1.83223	1.98561
677	0.303918	0.285657	0.158938	0.282571	0.357193	0.422224	1.83161	0.451	0.463	0.568	0.454	0.448	0.451	1.55126	1.42026	0.644147	1.43277	1.8354	2.15512	0.439069	0.350843	-0.439829	0.359611	0.607261	0.767847	8.07303	6.76713	1.39199	6.88684	11.3013	15.5815	1.68562	1.61288	1.0862	1.61996	1.8335	1.98679
676.5	0.304013	0.285853	0.158923	0.282727	0.357111	0.422047	1.83296	0.451	0.463	0.568	0.454	0.448	0.451	1.55175	1.42124	0.644086	1.43356	1.83498	2.15422	0.439381	0.351529	-0.439923	0.360163	0.607032	0.767428	8.09002	6.78644	1.39378	6.90464	11.3128	15.5915	1.6865	1.61403	1.08655	1.62101	1.83397	1.98711
676	0.304039	0.285884	0.158845	0.282627	0.357325	0.422153	1.83432	0.451	0.463	0.568	0.454	0.448	0.451	1.55188	1.42139	0.64377	1.43306	1.83608	2.15476	0.439467	0.351637	-0.440414	0.359809	0.607631	0.767679	8.10338	6.79796	1.39448	6.90997	11.3431	15.6224	1.6872	1.61471	1.08668	1.62132	1.8352	1.98809
675.5	0.304087	0.285804	0.159046	0.282641	0.357201	0.422282	1.83568	0.451	0.463	0.568	0.454	0.448	0.451	1.55212	1.421	0.644584	1.43313	1.83544	2.15542	0.439625	0.351358	-0.43915	0.359859	0.607284	0.767984	8.11794	6.80421	1.40008	6.92089	11.352	15.6551	1.68796	1.61508	1.08777	1.62196	1.83556	1.98913
675	0.304031	0.285949	0.159076	0.282844	0.357271	0.422428	1.83704	0.451	0.463	0.568	0.454	0.448	0.451	1.55184	1.42172	0.644706	1.43416	1.8358	2.15616	0.439441	0.351865	-0.438961	0.360577	0.60748	0.76833	8.12698	6.82121	1.40268	6.94111	11.3733	15.6891	1.68843	1.61609	1.08828	1.62314	1.83642	1.99021
674.5	0.303977	0.286154	0.158949	0.282888	0.357306	0.422425	1.8384	0.451	0.463	0.568	0.454	0.448	0.451	1.55156	1.42274	0.644191	1.43438	1.83598	2.15615	0.439263	0.352581	-0.43976	0.360732	0.607578	0.768323	8.13614	6.84113	1.40252	6.95356	11.3924	15.7122	1.6889	1.61727	1.08825	1.62387	1.83719	1.99094
674	0.304043	0.286082	0.158917	0.28287	0.357347	0.422438	1.83976	0.451	0.463	0.568	0.454	0.448	0.451	1.5519	1.42238	0.644062	1.43429	1.83619	2.15621	0.43948	0.35233	-0.439961	0.360669	0.607692	0.768354	8.15176	6.84784	1.40404	6.963	11.4119	15.7365	1.68971	1.61766	1.08854	1.62442	1.83798	1.99171
673.5	0.304099	0.286127	0.158934	0.282845	0.357335	0.422412	1.84113	0.451	0.463	0.568	0.454	0.448	0.451	1.55219	1.4226	0.64413	1.43416	1.83613	2.15608	0.439664	0.352487	-0.439854	0.36058	0.607659	0.768292	8.16687	6.86016	1.40642	6.97211	11.4281	15.7579	1.6905	1.61839	1.089	1.62495	1.83863	1.99239
673	0.304155	0.286002	0.158886	0.282991	0.357427	0.42262	1.8425	0.451	0.463	0.568	0.454	0.448	0.451	1.55247	1.42198	0.643936	1.4349	1.8366	2.15714	0.439848	0.35205	-0.440156	0.361096	0.607916	0.768784	8.18202	6.86436	1.40766	6.98968	11.451	15.7969	1.69128	1.61864	1.08924	1.62598	1.83955	1.99362
672.5	0.304063	0.286142	0.158993	0.283169	0.357521	0.422712	1.84387	0.451	0.463	0.568	0.454	0.448	0.451	1.552	1.42268	0.64437	1.4358	1.83708	2.15761	0.439546	0.352539	-0.439483	0.361725	0.608179	0.769002	8.18924	6.8813	1.41166	7.00889	11.474	15.8273	1.69165	1.61964	1.09001	1.62709	1.84047	1.99458
672	0.304076	0.286237	0.159099	0.283027	0.357341	0.422733	1.84524	0.451	0.463	0.568	0.454	0.448	0.451	1.55207	1.42315	0.644799	1.43508	1.83616	2.15772	0.439589	0.352871	-0.438816	0.361223	0.607676	0.769052	8.20213	6.89612	1.41564	7.01228	11.4796	15.8524	1.69232	1.62051	1.09078	1.62729	1.84069	1.99537
671.5	0.304127	0.286047	0.15887	0.283138	0.357429	0.422745	1.84661	0.451	0.463	0.568	0.454	0.448	0.451	1.55233	1.4222	0.643871	1.43565	1.83661	2.15778	0.439756	0.352207	-0.440257	0.361616	0.607922	0.76908	8.21711	6.89723	1.41367	7.02824	11.5023	15.8769	1.69309	1.62057	1.0904	1.62821	1.8416	1.99614
671	0.304097	0.286178	0.158905	0.283136	0.357454	0.422717	1.84799	0.451	0.463	0.568	0.454	0.448	0.451	1.55218	1.42285	0.644013	1.43564	1.83674	2.15764	0.439658	0.352665	-0.440037	0.361608	0.607992	0.769014	8.22773	6.91384	1.4164	7.03862	11.5211	15.8985	1.69364	1.62155	1.09093	1.62882	1.84235	1.99682
670.5	0.304173	0.286163	0.158883	0.283178	0.357336	0.422577	1.84937	0.451	0.463	0.568	0.454	0.448	0.451	1.55256	1.42278	0.643924	1.43585	1.83613	2.15692	0.439908	0.352613	-0.440175	0.361757	0.607662	0.768683	8.24413	6.92343	1.41813	7.05121	11.5307	15.9116	1.69448	1.62211	1.09126	1.62954	1.84274	1.99723
670	0.304193	0.286284	0.159015	0.283372	0.357396	0.422764	1.85075	0.451	0.463	0.568	0.454	0.448	0.451	1.55267	1.42338	0.644459	1.43683	1.83644	2.15788	0.439973	0.353036	-0.439345	0.362442	0.607829	0.769125	8.25752	6.93963	1.4226	7.07142	11.5517	15.9495	1.69517	1.62306	1.09212	1.63071	1.84358	1.99842
669.5	0.304171	0.286278	0.15894	0.283277	0.357603	0.422731	1.85213	0.451	0.463	0.568	0.454	0.448	0.451	1.55255	1.42335	0.644155	1.43635	1.8375	2.15771	0.439901	0.353015	-0.439816	0.362106	0.608409	0.769047	8.26866	6.94971	1.42339	7.07724	11.5824	15.9708	1.69574	1.62365	1.09227	1.63104	1.8448	1.99909
669	0.304218	0.286312	0.158934	0.283484	0.35762	0.422953	1.85351	0.451	0.463	0.568	0.454	0.448	0.451	1.55279	1.42352	0.64413	1.4374	1.83759	2.15884	0.440056	0.353133	-0.439854	0.362837	0.608456	0.769572	8.28359	6.96176	1.42541	7.09818	11.6008	16.0115	1.6965	1.62435	1.09266	1.63225	1.84554	2.00036
668.5	0.304247	0.286289	0.1589	0.283539	0.357614	0.422926	1.8549	0.451	0.463	0.568	0.454	0.448	0.451	1.55294	1.42341	0.643993	1.43768	1.83756	2.1587	0.440151	0.353053	-0.440068	0.363031	0.608439	0.769508	8.29757	6.97106	1.42693	7.11156	11.6178	16.0334	1.69722	1.62489	1.09295	1.63302	1.84621	2.00104
668	0.304227	0.286344	0.15889	0.283605	0.357651	0.422858	1.85629	0.451	0.463	0.568	0.454	0.448	0.451	1.55284	1.42368	0.643952	1.43801	1.83775	2.15836	0.440085	0.353245	-0.440131	0.363264	0.608543	0.769347	8.3089	6.98418	1.42889	7.12553	11.6376	16.0523	1.6978	1.62566	1.09333	1.63382	1.847	2.00163
667.5	0.304213	0.286423	0.159048	0.283585	0.357446	0.422923	1.85768	0.451	0.463	0.568	0.454	0.448	0.451	1.55277	1.42407	0.644592	1.43791	1.8367	2.15869	0.440039	0.353521	-0.439137	0.363193	0.607969	0.769501	8.32059	6.9985	1.43387	7.1352	11.6417	16.0813	1.69839	1.62649	1.09428	1.63437	1.84716	2.00254
667	0.304206	0.286398	0.158949	0.283566	0.357555	0.4229	1.85907	0.451	0.463	0.568	0.454	0.448	0.451	1.55273	1.42395	0.644191	1.43782	1.83726	2.15857	0.440016	0.353434	-0.43976	0.363126	0.608274	0.769447	8.33268	7.00778	1.43424	7.14495	11.6663	16.1037	1.69901	1.62703	1.09435	1.63493	1.84813	2.00323
666.5	0.304235	0.286398	0.15881	0.283658	0.357382	0.423018	1.86047	0.451	0.463	0.568	0.454	0.448	0.451	1.55288	1.42395	0.643628	1.43828	1.83637	2.15917	0.440111	0.353434	-0.440635	0.36345	0.60779	0.769726	8.34678	7.0183	1.43388	7.16031	11.6725	16.1368	1.69973	1.62764	1.09428	1.63581	1.84838	2.00426
666	0.304224	0.286394	0.158975	0.283619	0.357599	0.423095	1.86186	0.451	0.463	0.568	0.454	0.448	0.451	1.55282	1.42393	0.644297	1.43809	1.83748	2.15957	0.440075	0.35342	-0.439596	0.363313	0.608397	0.769908	8.35871	7.02864	1.43902	7.1691	11.7042	16.167	1.70034	1.62824	1.09526	1.63631	1.84963	2.0052
665.5	0.304251	0.286319	0.158881	0.28376	0.357614	0.423221	1.86326	0.451	0.463	0.568	0.454	0.448	0.451	1.55296	1.42356	0.643916	1.4388	1.83756	2.16021	0.440164	0.353158	-0.440188	0.36381	0.608439	0.770205	8.37276	7.03552	1.43948	7.18701	11.7228	16.2009	1.70105	1.62864	1.09535	1.63733	1.85037	2.00625
665	0.304333	0.286334	0.158833	0.283696	0.357687	0.42318	1.86466	0.451	0.463	0.568	0.454	0.448	0.451	1.55338	1.42363	0.643721	1.43848	1.83794	2.16	0.440433	0.35321	-0.44049	0.363584	0.608643	0.770109	8.38988	7.04684	1.44077	7.19458	11.7452	16.2221	1.70192	1.62929	1.09559	1.63776	1.85125	2.00691
664.5	0.304309	0.286437	0.158802	0.283853	0.357741	0.423145	1.86606	0.451	0.463	0.568	0.454	0.448	0.451	1.55326	1.42414	0.643595	1.43927	1.83821	2.15982	0.440355	0.35357	-0.440685	0.364138	0.608794	0.770026	8.40119	7.06253	1.44238	7.21339	11.7664	16.2439	1.70249	1.6302	1.0959	1.63883	1.85209	2.00758
664	0.304359	0.286448	0.158852	0.283925	0.357814	0.423089	1.86747	0.451	0.463	0.568	0.454	0.448	0.451	1.55351	1.4242	0.643798	1.43964	1.83859	2.15954	0.440519	0.353608	-0.44037	0.364391	0.608998	0.769894	8.41661	7.07371	1.44546	7.22792	11.789	16.264	1.70327	1.63084	1.09648	1.63966	1.85297	2.0082
663.5	0.304335	0.286493	0.158757	0.284018	0.357685	0.42304	1.86888	0.451	0.463	0.568	0.454	0.448	0.451	1.55339	1.42442	0.643413	1.44011	1.83793	2.15929	0.44044	0.353765	-0.440968	0.364719	0.608638	0.769778	8.42797	7.0866	1.44591	7.24356	11.7982	16.2848	1.70385	1.63158	1.09657	1.64054	1.85334	2.00884
663	0.30428	0.28653	0.158986	0.283909	0.357821	0.42322	1.87029	0.451	0.463	0.568	0.454	0.448	0.451	1.55311	1.4246	0.644341	1.43956	1.83862	2.1602	0.440259	0.353894	-0.439527	0.364335	0.609018	0.770203	8.43763	7.09913	1.45227	7.24892	11.825	16.3232	1.70434	1.6323	1.09777	1.64085	1.85439	2.01003
662.5	0.304312	0.286382	0.158798	0.284079	0.357807	0.423319	1.8717	0.451	0.463	0.568	0.454	0.448	0.451	1.55327	1.42387	0.643579	1.44042	1.83855	2.16071	0.440364	0.353378	-0.44071	0.364933	0.608979	0.770437	8.45215	7.10251	1.45103	7.26857	11.842	16.3555	1.70507	1.6325	1.09754	1.64196	1.85505	2.01102
662	0.304381	0.286533	0.158742	0.283954	0.357841	0.423224	1.87311	0.451	0.463	0.568	0.454	0.448	0.451	1.55363	1.42462	0.643352	1.43978	1.83873	2.16023	0.440591	0.353905	-0.441063	0.364493	0.609074	0.770213	8.46876	7.12074	1.4522	7.27315	11.8621	16.3729	1.70591	1.63355	1.09776	1.64222	1.85584	2.01155
661.5	0.304401	0.286426	0.158794	0.284203	0.357765	0.4233	1.87453	0.451	0.463	0.568	0.454	0.448	0.451	1.55373	1.42409	0.643563	1.44105	1.83834	2.16061	0.440657	0.353531	-0.440735	0.36537	0.608861	0.770392	8.48269	7.12619	1.45534	7.29693	11.875	16.4035	1.70661	1.63386	1.09835	1.64356	1.85634	2.01249
661	0.304409	0.28645	0.158702	0.284316	0.357947	0.423354	1.87595	0.451	0.463	0.568	0.454	0.448	0.451	1.55377	1.42421	0.64319	1.44162	1.83927	2.16089	0.440683	0.353615	-0.441315	0.365767	0.60937	0.77052	8.49597	7.13817	1.45586	7.31378	11.9051	16.4326	1.70727	1.63454	1.09845	1.64451	1.85752	2.01338
660.5	0.304419	0.286594	0.158719	0.284235	0.357867	0.423243	1.87737	0.451	0.463	0.568	0.454	0.448	0.451	1.55382	1.42492	0.643259	1.44121	1.83886	2.16032	0.440716	0.354118	-0.441208	0.365482	0.609146	0.770257	8.5094	7.15617	1.45838	7.32069	11.9178	16.4488	1.70795	1.63557	1.09892	1.64489	1.85801	2.01388
660	0.304376	0.286603	0.15865	0.284272	0.357977	0.423471	1.87879	0.451	0.463	0.568	0.454	0.448	0.451	1.5536	1.42497	0.642979	1.4414	1.83943	2.16149	0.440575	0.354149	-0.441643	0.365613	0.609454	0.770796	8.51989	7.16747	1.45932	7.33369	11.9432	16.4915	1.70847	1.63622	1.0991	1.64562	1.859	2.01519
659.5	0.304402	0.286562	0.158757	0.284364	0.357815	0.423445	1.88021	0.451	0.463	0.568	0.454	0.448	0.451	1.55373	1.42476	0.643413	1.44186	1.83859	2.16135	0.44066	0.354006	-0.440968	0.365936	0.609001	0.770735	8.53427	7.17628	1.4635	7.34957	11.9505	16.5145	1.70919	1.63672	1.09989	1.64651	1.85929	2.01589
659	0.304454	0.286475	0.158748	0.284358	0.357989	0.423598	1.88164	0.451	0.463	0.568	0.454	0.448	0.451	1.554	1.42433	0.643377	1.44183	1.83949	2.16213	0.440831	0.353703	-0.441025	0.365915	0.609487	0.771096	8.55014	7.18281	1.46556	7.36042	11.9803	16.5515	1.70999	1.63709	1.10027	1.64712	1.86044	2.01702
658.5	0.304533	0.286634	0.158822	0.284343	0.35797	0.423791	1.88307	0.451	0.463	0.568	0.454	0.448	0.451	1.5544	1.42512	0.643676	1.44176	1.83939	2.16312	0.44109	0.354257	-0.440559	0.365862	0.609434	0.771551	8.56758	7.20171	1.46915	7.37082	11.9972	16.5918	1.71086	1.63817	1.10095	1.6477	1.8611	2.01824
658	0.304484	0.286654	0.158766	0.284451	0.357957	0.423614	1.8845	0.451	0.463	0.568	0.454	0.448	0.451	1.55415	1.42522	0.64345	1.4423	1.83932	2.16222	0.44093	0.354327	-0.440912	0.366242	0.609398	0.771134	8.57784	7.21367	1.47035	7.38764	12.0146	16.6031	1.71137	1.63885	1.10117	1.64864	1.86177	2.01859
657.5	0.304502	0.286656	0.158706	0.284445	0.357984	0.423587	1.88593	0.451	0.463	0.568	0.454	0.448	0.451	1.55424	1.42523	0.643206	1.44227	1.83946	2.16208	0.440989	0.354334	-0.44129	0.366221	0.609473	0.77107	8.59191	7.22475	1.47147	7.39856	12.0347	16.6263	1.71207	1.63948	1.10138	1.64925	1.86255	2.01929
657	0.30451	0.28665	0.158875	0.284668	0.357959	0.423765	1.88737	0.451	0.463	0.568	0.454	0.448	0.451	1.55428	1.4252	0.643891	1.4434	1.83933	2.16299	0.441015	0.354313	-0.440225	0.367005	0.609404	0.77149	8.60544	7.23544	1.47685	7.42145	12.0513	16.6656	1.71275	1.64008	1.10239	1.65053	1.8632	2.02048
656.5	0.304478	0.286693	0.158604	0.284697	0.358112	0.423758	1.8888	0.451	0.463	0.568	0.454	0.448	0.451	1.55412	1.42542	0.642793	1.44355	1.84012	2.16295	0.44091	0.354463	-0.441933	0.367107	0.609831	0.771474	8.61675	7.24864	1.47406	7.43428	12.08	16.6904	1.71331	1.64083	1.10187	1.65124	1.8643	2.02124
656	0.304602	0.286649	0.158777	0.284513	0.357971	0.42378	1.89024	0.451	0.463	0.568	0.454	0.448	0.451	1.55475	1.4252	0.643494	1.44262	1.8394	2.16306	0.441317	0.35431	-0.440842	0.36646	0.609437	0.771525	8.63692	7.25747	1.47953	7.43599	12.0889	16.7176	1.71431	1.64133	1.10289	1.65133	1.86465	2.02206
655.5	0.304558	0.28681	0.158696	0.284758	0.358013	0.423679	1.89169	0.451	0.463	0.568	0.454	0.448	0.451	1.55453	1.426	0.643166	1.44386	1.83961	2.16255	0.441173	0.354871	-0.441353	0.367321	0.609554	0.771287	8.6476	7.27671	1.48028	7.46017	12.1102	16.7351	1.71484	1.64242	1.10303	1.65267	1.86547	2.02259
655	0.30463	0.286888	0.158785	0.284884	0.358208	0.424042	1.89313	0.451	0.463	0.568	0.454	0.448	0.451	1.5549	1.42638	0.643527	1.4445	1.84061	2.1644	0.441409	0.355143	-0.440792	0.367763	0.610099	0.772143	8.6649	7.29179	1.4842	7.47818	12.1419	16.7894	1.7157	1.64327	1.10376	1.65367	1.86669	2.02423
654.5	0.304671	0.286894	0.158715	0.284914	0.358061	0.424072	1.89458	0.451	0.463	0.568	0.454	0.448	0.451	1.55511	1.42641	0.643243	1.44465	1.83986	2.16455	0.441543	0.355164	-0.441233	0.367868	0.609688	0.772214	8.68048	7.30324	1.48516	7.49119	12.1505	16.8175	1.71647	1.64391	1.10393	1.65439	1.86702	2.02507
654	0.30458	0.286808	0.158693	0.285086	0.358231	0.423949	1.89602	0.451	0.463	0.568	0.454	0.448	0.451	1.55464	1.42599	0.643154	1.44552	1.84073	2.16393	0.441245	0.354864	-0.441372	0.368472	0.610163	0.771924	8.68857	7.31003	1.48702	7.51171	12.1806	16.8334	1.71687	1.6443	1.10428	1.65552	1.86817	2.02555
653.5	0.304626	0.286711	0.158672	0.285062	0.35833	0.424101	1.89748	0.451	0.463	0.568	0.454	0.448	0.451	1.55488	1.4255	0.643069	1.4454	1.84124	2.1647	0.441396	0.354526	-0.441504	0.368388	0.610439	0.772283	8.7045	7.31627	1.4889	7.52194	12.206	16.8713	1.71765	1.64465	1.10463	1.65608	1.86915	2.02669
653	0.304667	0.286887	0.158681	0.284969	0.358063	0.424019	1.89893	0.451	0.463	0.568	0.454	0.448	0.451	1.55509	1.42638	0.643105	1.44493	1.83987	2.16428	0.44153	0.35514	-0.441447	0.368062	0.609694	0.772089	8.72018	7.33647	1.49135	7.52855	12.2065	16.8906	1.71843	1.64578	1.10508	1.65645	1.86916	2.02727
652.5	0.304707	0.286974	0.158577	0.285071	0.358197	0.424131	1.90038	0.451	0.463	0.568	0.454	0.448	0.451	1.55529	1.42681	0.642684	1.44545	1.84056	2.16485	0.441662	0.355443	-0.442103	0.368419	0.610068	0.772353	8.73584	7.35218	1.49168	7.54549	12.2343	16.9254	1.7192	1.64666	1.10514	1.65738	1.87023	2.02831
652	0.304672	0.286955	0.158779	0.285062	0.358303	0.424308	1.90184	0.451	0.463	0.568	0.454	0.448	0.451	1.55511	1.42672	0.643502	1.4454	1.8411	2.16576	0.441547	0.355377	-0.44083	0.368388	0.610364	0.772771	8.74724	7.36249	1.49778	7.55659	12.2604	16.9656	1.71976	1.64724	1.10627	1.65799	1.87122	2.02951
651.5	0.304638	0.287009	0.158643	0.284994	0.358447	0.424345	1.9033	0.451	0.463	0.568	0.454	0.448	0.451	1.55494	1.42699	0.642951	1.44506	1.84184	2.16595	0.441435	0.355565	-0.441687	0.368149	0.610766	0.772858	8.75871	7.37657	1.49751	7.56458	12.2891	16.9946	1.72032	1.64802	1.10622	1.65843	1.87232	2.03038
651	0.304685	0.286984	0.158761	0.285181	0.35833	0.424484	1.90476	0.451	0.463	0.568	0.454	0.448	0.451	1.55518	1.42686	0.643429	1.44601	1.84124	2.16666	0.441589	0.355478	-0.440943	0.368805	0.610439	0.773185	8.77488	7.38661	1.50205	7.58615	12.2999	17.0318	1.72112	1.64859	1.10706	1.65961	1.87273	2.03149
650.5	0.304727	0.287046	0.158738	0.285177	0.358333	0.424446	1.90623	0.451	0.463	0.568	0.454	0.448	0.451	1.55539	1.42717	0.643336	1.44599	1.84126	2.16646	0.441727	0.355694	-0.441088	0.368791	0.610448	0.773096	8.7908	7.40117	1.50392	7.5976	12.319	17.055	1.7219	1.6494	1.1074	1.66023	1.87346	2.03218
650	0.304753	0.287037	0.15881	0.285273	0.35841	0.424369	1.90769	0.451	0.463	0.568	0.454	0.448	0.451	1.55552	1.42713	0.643628	1.44647	1.84165	2.16607	0.441813	0.355662	-0.440635	0.369128	0.610663	0.772914	8.80583	7.4121	1.5076	7.61442	12.3433	17.075	1.72263	1.65001	1.10808	1.66115	1.87438	2.03278
649.5	0.304735	0.286988	0.158737	0.285325	0.35835	0.424398	1.90916	0.451	0.463	0.568	0.454	0.448	0.451	1.55543	1.42688	0.643332	1.44674	1.84134	2.16622	0.441754	0.355492	-0.441094	0.36931	0.610495	0.772983	8.81835	7.42098	1.50853	7.62893	12.3582	17.1037	1.72324	1.6505	1.10825	1.66194	1.87495	2.03363
649	0.304796	0.287108	0.158648	0.285472	0.358479	0.424315	1.91063	0.451	0.463	0.568	0.454	0.448	0.451	1.55574	1.42748	0.642971	1.44748	1.84201	2.16579	0.441954	0.35591	-0.441655	0.369825	0.610855	0.772787	8.83548	7.43863	1.50917	7.64856	12.3861	17.1233	1.72408	1.65148	1.10837	1.66301	1.87601	2.03422
648.5	0.304833	0.287075	0.158743	0.28539	0.358421	0.424353	1.9121	0.451	0.463	0.568	0.454	0.448	0.451	1.55593	1.42731	0.643356	1.44707	1.84171	2.16599	0.442075	0.355795	-0.441057	0.369538	0.610693	0.772877	8.85126	7.4484	1.51331	7.65596	12.4012	17.1528	1.72485	1.65202	1.10913	1.66341	1.87658	2.03509
648	0.304839	0.287162	0.158712	0.285481	0.358354	0.424514	1.91358	0.451	0.463	0.568	0.454	0.448	0.451	1.55596	1.42775	0.643231	1.44753	1.84136	2.16681	0.442095	0.356098	-0.441252	0.369857	0.610506	0.773256	8.86527	7.46442	1.51505	7.67267	12.4157	17.1923	1.72553	1.65291	1.10945	1.66432	1.87712	2.03626
647.5	0.304853	0.28719	0.158648	0.285461	0.358406	0.424639	1.91506	0.451	0.463	0.568	0.454	0.448	0.451	1.55603	1.42789	0.642971	1.44743	1.84163	2.16745	0.442141	0.356195	-0.441655	0.369787	0.610651	0.77355	8.87978	7.47741	1.51617	7.68345	12.4385	17.229	1.72624	1.65363	1.10965	1.6649	1.87799	2.03735
647	0.304902	0.287064	0.158638	0.285676	0.358287	0.424666	1.91654	0.451	0.463	0.568	0.454	0.448	0.451	1.55628	1.42726	0.642931	1.44852	1.84102	2.16759	0.442301	0.355756	-0.441718	0.370539	0.610319	0.773614	8.89637	7.4824	1.51832	7.70693	12.4495	17.2579	1.72704	1.6539	1.11005	1.66617	1.8784	2.0382
646.5	0.304926	0.287308	0.158675	0.285753	0.358306	0.424751	1.91802	0.451	0.463	0.568	0.454	0.448	0.451	1.55641	1.42847	0.643081	1.44891	1.84112	2.16802	0.44238	0.356606	-0.441485	0.370809	0.610372	0.773814	8.91154	7.50672	1.52138	7.72301	12.4701	17.2915	1.72778	1.65525	1.1106	1.66704	1.87918	2.03919
646	0.304914	0.287189	0.158701	0.285644	0.358418	0.424813	1.9195	0.451	0.463	0.568	0.454	0.448	0.451	1.55635	1.42788	0.643186	1.44835	1.84169	2.16834	0.442341	0.356192	-0.441321	0.370427	0.610685	0.77396	8.92464	7.51212	1.52423	7.72907	12.4972	17.3233	1.72841	1.65554	1.11112	1.66737	1.8802	2.04013
645.5	0.304877	0.287203	0.15875	0.28563	0.358495	0.424756	1.92099	0.451	0.463	0.568	0.454	0.448	0.451	1.55616	1.42795	0.643385	1.44828	1.84209	2.16805	0.442219	0.356241	-0.441012	0.370378	0.6109	0.773826	8.9363	7.5245	1.52754	7.74029	12.5219	17.3455	1.72898	1.65623	1.11173	1.66797	1.88113	2.04078
645	0.304995	0.287193	0.158773	0.285756	0.358451	0.424823	1.92248	0.451	0.463	0.568	0.454	0.448	0.451	1.55676	1.4279	0.643478	1.44892	1.84186	2.16839	0.442606	0.356206	-0.440868	0.370819	0.610777	0.773984	8.95709	7.53564	1.53035	7.75914	12.5383	17.3779	1.72998	1.65684	1.11224	1.66899	1.88174	2.04174
644.5	0.30503	0.287211	0.158729	0.285869	0.358544	0.424957	1.92397	0.451	0.463	0.568	0.454	0.448	0.451	1.55694	1.42799	0.6433	1.44949	1.84234	2.16907	0.442721	0.356268	-0.441145	0.371215	0.611036	0.774299	8.97305	7.54829	1.53188	7.77733	12.5643	17.4159	1.73075	1.65753	1.11252	1.66997	1.88271	2.04285
644	0.30499	0.287255	0.158732	0.285846	0.358322	0.424808	1.92547	0.451	0.463	0.568	0.454	0.448	0.451	1.55673	1.42821	0.643312	1.44938	1.8412	2.16831	0.44259	0.356422	-0.441126	0.371134	0.610417	0.773948	8.98463	7.56233	1.53432	7.78816	12.5682	17.4307	1.73131	1.6583	1.11296	1.67055	1.88286	2.04328
643.5	0.305012	0.28739	0.158684	0.286034	0.358533	0.425087	1.92696	0.451	0.463	0.568	0.454	0.448	0.451	1.55685	1.42888	0.643117	1.45033	1.84228	2.16973	0.442662	0.356891	-0.441428	0.371792	0.611006	0.774605	8.9999	7.5812	1.53577	7.81053	12.6026	17.4807	1.73205	1.65934	1.11322	1.67175	1.88415	2.04475
643	0.305023	0.287338	0.158843	0.285944	0.358539	0.425051	1.92846	0.451	0.463	0.568	0.454	0.448	0.451	1.5569	1.42862	0.643762	1.44987	1.84231	2.16955	0.442698	0.35671	-0.440427	0.371477	0.611023	0.77452	9.01455	7.59025	1.54124	7.81776	12.6226	17.505	1.73275	1.65983	1.11421	1.67213	1.8849	2.04546
642.5	0.305098	0.287332	0.158792	0.286094	0.358555	0.425183	1.92996	0.451	0.463	0.568	0.454	0.448	0.451	1.55729	1.42859	0.643555	1.45064	1.8424	2.17022	0.442944	0.35669	-0.440748	0.372002	0.611067	0.774831	9.03303	7.60175	1.54265	7.83815	12.6434	17.5431	1.73364	1.66046	1.11447	1.67322	1.88567	2.04657
642	0.305163	0.287512	0.158806	0.286172	0.358667	0.425119	1.93146	0.451	0.463	0.568	0.454	0.448	0.451	1.55762	1.42949	0.643612	1.45103	1.84297	2.1699	0.443157	0.357316	-0.44066	0.372274	0.611379	0.77468	9.05096	7.62314	1.54533	7.85464	12.671	17.5652	1.7345	1.66163	1.11495	1.6741	1.8867	2.04721
641.5	0.305075	0.287572	0.158772	0.286225	0.358632	0.424928	1.93297	0.451	0.463	0.568	0.454	0.448	0.451	1.55717	1.42979	0.643474	1.4513	1.84279	2.16892	0.442869	0.357525	-0.440874	0.372459	0.611282	0.774231	9.05985	7.63822	1.54708	7.86981	12.6883	17.5767	1.73492	1.66245	1.11526	1.67491	1.88734	2.04755
641	0.305117	0.287597	0.158732	0.286254	0.358808	0.425286	1.93448	0.451	0.463	0.568	0.454	0.448	0.451	1.55738	1.42991	0.643312	1.45145	1.8437	2.17075	0.443006	0.357611	-0.441126	0.372561	0.611773	0.775073	9.07648	7.65147	1.54871	7.88369	12.7206	17.6338	1.73572	1.66317	1.11556	1.67565	1.88854	2.04921
640.5	0.305171	0.28758	0.15871	0.286185	0.358725	0.425281	1.93599	0.451	0.463	0.568	0.454	0.448	0.451	1.55766	1.42983	0.643223	1.4511	1.84327	2.17072	0.443183	0.357552	-0.441264	0.37232	0.611541	0.775061	9.09388	7.66251	1.5507	7.89219	12.7345	17.661	1.73655	1.66377	1.11592	1.6761	1.88906	2.05
640	0.30515	0.287662	0.158694	0.286179	0.358801	0.425283	1.9375	0.451	0.463	0.568	0.454	0.448	0.451	1.55755	1.43023	0.643158	1.45107	1.84366	2.17073	0.443114	0.357837	-0.441365	0.372299	0.611753	0.775066	9.10684	7.67887	1.55281	7.9042	12.7598	17.6887	1.73717	1.66466	1.1163	1.67674	1.89	2.0508
639.5	0.30517	0.287594	0.158811	0.286307	0.358847	0.42513	1.93901	0.451	0.463	0.568	0.454	0.448	0.451	1.55765	1.4299	0.643632	1.45172	1.8439	2.16995	0.44318	0.357601	-0.440628	0.372746	0.611881	0.774706	9.12228	7.68724	1.55753	7.92365	12.7831	17.7037	1.7379	1.66511	1.11714	1.67777	1.89086	2.05124
639	0.305227	0.287774	0.158897	0.286262	0.35895	0.425347	1.94053	0.451	0.463	0.568	0.454	0.448	0.451	1.55794	1.43079	0.64398	1.45149	1.84443	2.17106	0.443367	0.358227	-0.440087	0.372589	0.612168	0.775216	9.13998	7.70892	1.56166	7.93356	12.8104	17.7495	1.73875	1.66628	1.11788	1.67829	1.89187	2.05256
638.5	0.305227	0.28774	0.158709	0.28659	0.359003	0.425425	1.94205	0.451	0.463	0.568	0.454	0.448	0.451	1.55794	1.43062	0.643219	1.45315	1.8447	2.17146	0.443367	0.358109	-0.441271	0.373734	0.612316	0.7754	9.1543	7.71917	1.56041	7.96421	12.8343	17.7838	1.73943	1.66684	1.11766	1.67991	1.89275	2.05355
638	0.305218	0.287745	0.158793	0.286682	0.358992	0.425367	1.94357	0.451	0.463	0.568	0.454	0.448	0.451	1.5579	1.43065	0.643559	1.45362	1.84464	2.17116	0.443337	0.358126	-0.440742	0.374055	0.612285	0.775263	9.16811	7.73154	1.56451	7.98182	12.8536	17.8069	1.74008	1.6675	1.11839	1.68084	1.89346	2.05422
637.5	0.305262	0.287829	0.158844	0.286584	0.358937	0.425458	1.9451	0.451	0.463	0.568	0.454	0.448	0.451	1.55812	1.43106	0.643766	1.45312	1.84436	2.17163	0.443481	0.358418	-0.440421	0.373713	0.612132	0.775477	9.18515	7.7482	1.56797	7.98888	12.8699	17.8424	1.74089	1.6684	1.11901	1.68121	1.89406	2.05524
637	0.305328	0.287858	0.158735	0.286724	0.359238	0.425486	1.94662	0.451	0.463	0.568	0.454	0.448	0.451	1.55846	1.43121	0.643324	1.45383	1.84591	2.17177	0.443698	0.358519	-0.441107	0.374201	0.61297	0.775543	9.20355	7.76193	1.56828	8.00924	12.9117	17.8728	1.74176	1.66914	1.11907	1.68228	1.8956	2.05612
636.5	0.305281	0.287888	0.158814	0.286858	0.359165	0.42561	1.94815	0.451	0.463	0.568	0.454	0.448	0.451	1.55822	1.43136	0.643644	1.45451	1.84553	2.1724	0.443544	0.358623	-0.440609	0.374668	0.612767	0.775834	9.21518	7.77575	1.57231	8.02933	12.9267	17.9113	1.74231	1.66988	1.11978	1.68333	1.89615	2.05723
636	0.30528	0.287877	0.158864	0.286871	0.359258	0.425758	1.94969	0.451	0.463	0.568	0.454	0.448	0.451	1.55821	1.4313	0.643847	1.45457	1.84601	2.17316	0.44354	0.358585	-0.440295	0.374714	0.613026	0.776182	9.22961	7.78739	1.57577	8.04269	12.9538	17.952	1.74299	1.67051	1.1204	1.68403	1.89714	2.05839
635.5	0.305395	0.287919	0.158793	0.28705	0.359167	0.425726	1.95122	0.451	0.463	0.568	0.454	0.448	0.451	1.5588	1.43151	0.643559	1.45548	1.84554	2.173	0.443917	0.35873	-0.440742	0.375338	0.612773	0.776107	9.25111	7.80192	1.57684	8.06541	12.9676	17.9775	1.74401	1.67128	1.12059	1.68522	1.89764	2.05912
635	0.305441	0.287978	0.158878	0.287091	0.359373	0.425667	1.95276	0.451	0.463	0.568	0.454	0.448	0.451	1.55904	1.4318	0.643903	1.45569	1.8466	2.17269	0.444068	0.358935	-0.440206	0.37548	0.613346	0.775968	9.26847	7.81742	1.58102	8.08042	13.0029	18.0009	1.74483	1.67211	1.12133	1.686	1.89894	2.05979
634.5	0.305499	0.288021	0.158854	0.287004	0.359369	0.42563	1.95429	0.451	0.463	0.568	0.454	0.448	0.451	1.55933	1.43202	0.643806	1.45525	1.84658	2.17251	0.444257	0.359085	-0.440358	0.375177	0.613335	0.775881	9.28661	7.83208	1.58303	8.08826	13.0231	18.0261	1.74568	1.6729	1.12169	1.68641	1.89967	2.06051
634	0.305446	0.288144	0.158985	0.287222	0.359356	0.425768	1.95584	0.451	0.463	0.568	0.454	0.448	0.451	1.55906	1.43263	0.644337	1.45635	1.84651	2.17321	0.444084	0.359512	-0.439533	0.375937	0.613299	0.776206	9.29804	7.85114	1.58815	8.11333	13.0428	18.0663	1.74622	1.67391	1.12259	1.68772	1.90039	2.06166
633.5	0.305478	0.288179	0.158945	0.287209	0.359495	0.425631	1.95738	0.451	0.463	0.568	0.454	0.448	0.451	1.55922	1.4328	0.644175	1.45629	1.84723	2.17251	0.444189	0.359633	-0.439785	0.375891	0.613685	0.775884	9.31467	7.86545	1.58986	8.12541	13.0735	18.0832	1.747	1.67468	1.1229	1.68835	1.90151	2.06214
633	0.305463	0.288145	0.158979	0.287356	0.35941	0.425877	1.95893	0.451	0.463	0.568	0.454	0.448	0.451	1.55915	1.43263	0.644313	1.45703	1.84679	2.17377	0.44414	0.359515	-0.439571	0.376403	0.613449	0.776462	9.32848	7.87602	1.59305	8.14658	13.0879	18.1327	1.74764	1.67524	1.12346	1.68944	1.90203	2.06355
632.5	0.305495	0.288155	0.158962	0.28734	0.359528	0.425798	1.96047	0.451	0.463	0.568	0.454	0.448	0.451	1.55931	1.43268	0.644244	1.45695	1.8474	2.17336	0.444244	0.35955	-0.439678	0.376347	0.613777	0.776276	9.34519	7.88902	1.59523	8.15856	13.1172	18.1546	1.74843	1.67593	1.12384	1.69006	1.9031	2.06418
632	0.305534	0.288204	0.159074	0.287322	0.359421	0.426116	1.96203	0.451	0.463	0.568	0.454	0.448	0.451	1.55951	1.43293	0.644698	1.45686	1.84685	2.17499	0.444372	0.35972	-0.438974	0.376285	0.613479	0.777023	9.36237	7.9042	1.60001	8.17045	13.1302	18.2105	1.74923	1.67674	1.12468	1.69068	1.90356	2.06576
631.5	0.305612	0.288309	0.158916	0.287504	0.359641	0.425912	1.96358	0.451	0.463	0.568	0.454	0.448	0.451	1.55991	1.43345	0.644057	1.45778	1.84798	2.17395	0.444627	0.360084	-0.439967	0.376918	0.614091	0.776544	9.38199	7.92249	1.59936	8.19376	13.1671	18.2219	1.75014	1.6777	1.12457	1.69189	1.9049	2.06609
631	0.305642	0.288296	0.159014	0.287607	0.359572	0.425943	1.96513	0.451	0.463	0.568	0.454	0.448	0.451	1.56006	1.43339	0.644455	1.45831	1.84762	2.1741	0.444725	0.360039	-0.439351	0.377276	0.6139	0.776617	9.39871	7.93434	1.60387	8.21263	13.1829	18.2535	1.75092	1.67833	1.12536	1.69286	1.90547	2.06698
630.5	0.305648	0.288356	0.158874	0.287633	0.359745	0.426064	1.96669	0.451	0.463	0.568	0.454	0.448	0.451	1.56009	1.43368	0.643887	1.45844	1.84851	2.17472	0.444745	0.360247	-0.440232	0.377366	0.614381	0.776901	9.41399	7.95023	1.60359	8.22715	13.2165	18.2928	1.75163	1.67917	1.12531	1.69361	1.90669	2.06809
630	0.305648	0.288432	0.159117	0.28772	0.359613	0.426134	1.96825	0.451	0.463	0.568	0.454	0.448	0.451	1.56009	1.43406	0.644872	1.45888	1.84783	2.17508	0.444745	0.360511	-0.438703	0.377669	0.614014	0.777065	9.42894	7.96705	1.61105	8.2452	13.2278	18.3279	1.75233	1.68006	1.12662	1.69453	1.90709	2.06908
629.5	0.305616	0.288494	0.159052	0.287698	0.359726	0.426189	1.96982	0.451	0.463	0.568	0.454	0.448	0.451	1.55993	1.43437	0.644609	1.45877	1.84841	2.17536	0.44464	0.360726	-0.439112	0.377592	0.614328	0.777194	9.44195	7.98315	1.61229	8.25704	13.2571	18.3617	1.75293	1.68091	1.12684	1.69514	1.90815	2.07004
629	0.305694	0.28851	0.159005	0.287865	0.35979	0.426436	1.97138	0.451	0.463	0.568	0.454	0.448	0.451	1.56033	1.43445	0.644418	1.45962	1.84874	2.17662	0.444896	0.360781	-0.439407	0.378173	0.614506	0.777773	9.46179	7.99673	1.6139	8.27978	13.283	18.4123	1.75385	1.68162	1.12712	1.69631	1.90908	2.07146
628.5	0.305754	0.288501	0.159004	0.287689	0.359799	0.426334	1.97295	0.451	0.463	0.568	0.454	0.448	0.451	1.56063	1.4344	0.644414	1.45872	1.84879	2.1761	0.445092	0.36075	-0.439414	0.377561	0.614531	0.777534	9.48057	8.00896	1.61645	8.28282	13.3048	18.4328	1.75472	1.68226	1.12756	1.69646	1.90986	2.07204
628	0.305808	0.288551	0.159097	0.287801	0.359994	0.426359	1.97452	0.451	0.463	0.568	0.454	0.448	0.451	1.56091	1.43465	0.644791	1.45929	1.84979	2.17623	0.445268	0.360923	-0.438829	0.37795	0.615072	0.777593	9.49903	8.0245	1.62092	8.30248	13.3404	18.4643	1.75558	1.68308	1.12834	1.69747	1.91114	2.07292
627.5	0.305833	0.288659	0.159121	0.287844	0.359944	0.426481	1.9761	0.451	0.463	0.568	0.454	0.448	0.451	1.56104	1.43519	0.644888	1.45951	1.84953	2.17685	0.44535	0.361297	-0.438678	0.3781	0.614934	0.777879	9.51573	8.04331	1.624	8.3182	13.358	18.5043	1.75635	1.68406	1.12888	1.69827	1.91177	2.07405
627	0.305856	0.288584	0.159134	0.288049	0.360096	0.426703	1.97767	0.451	0.463	0.568	0.454	0.448	0.451	1.56115	1.43482	0.644941	1.46055	1.85031	2.17798	0.445425	0.361037	-0.438596	0.378812	0.615356	0.778399	9.53235	8.05196	1.62685	8.34334	13.3906	18.5531	1.75711	1.68452	1.12937	1.69955	1.91293	2.07541
626.5	0.305835	0.288776	0.159087	0.288044	0.359929	0.426569	1.97925	0.451	0.463	0.568	0.454	0.448	0.451	1.56105	1.43577	0.64475	1.46052	1.84946	2.1773	0.445357	0.361703	-0.438892	0.378794	0.614892	0.778085	9.54626	8.07555	1.62849	8.35637	13.3995	18.5711	1.75775	1.68575	1.12966	1.70022	1.91325	2.07591
626	0.305807	0.288717	0.15923	0.288162	0.360124	0.426749	1.98083	0.451	0.463	0.568	0.454	0.448	0.451	1.5609	1.43548	0.64533	1.46112	1.85046	2.17822	0.445265	0.361498	-0.437993	0.379204	0.615433	0.778507	9.55976	8.08515	1.63402	8.37659	13.4355	18.6165	1.75838	1.68625	1.13061	1.70124	1.91454	2.07718
625.5	0.305927	0.288674	0.159274	0.288101	0.359992	0.426815	1.98241	0.451	0.463	0.568	0.454	0.448	0.451	1.56152	1.43526	0.645508	1.46081	1.84978	2.17855	0.445657	0.361349	-0.437717	0.378992	0.615067	0.778662	9.58257	8.09567	1.63754	8.38643	13.4471	18.652	1.75942	1.6868	1.13122	1.70174	1.91495	2.07817
625	0.305895	0.288759	0.159176	0.288218	0.360024	0.42671	1.984	0.451	0.463	0.568	0.454	0.448	0.451	1.56135	1.43569	0.645111	1.4614	1.84994	2.17802	0.445553	0.361644	-0.438333	0.379398	0.615156	0.778416	9.5959	8.1134	1.63815	8.40668	13.471	18.6727	1.76004	1.68772	1.13133	1.70277	1.9158	2.07875
624.5	0.305962	0.288897	0.159162	0.288239	0.360037	0.426803	1.98559	0.451	0.463	0.568	0.454	0.448	0.451	1.5617	1.43637	0.645054	1.46151	1.85001	2.17849	0.445772	0.362121	-0.438421	0.379471	0.615192	0.778634	9.61548	8.13417	1.64048	8.42137	13.4936	18.7107	1.76093	1.6888	1.13173	1.70351	1.9166	2.07981
624	0.305987	0.288849	0.15919	0.288372	0.360283	0.426982	1.98718	0.451	0.463	0.568	0.454	0.448	0.451	1.56182	1.43613	0.645168	1.46219	1.85128	2.17941	0.445854	0.361955	-0.438245	0.379932	0.615875	0.779053	9.63247	8.1445	1.64369	8.44266	13.5337	18.7565	1.76171	1.68934	1.13228	1.70459	1.91802	2.08107
623.5	0.305967	0.288998	0.159344	0.288516	0.360306	0.4271	1.98877	0.451	0.463	0.568	0.454	0.448	0.451	1.56172	1.43688	0.645792	1.46292	1.85139	2.18001	0.445788	0.362471	-0.437278	0.380432	0.615939	0.779329	9.64666	8.16599	1.64951	8.46465	13.5571	18.7969	1.76236	1.69045	1.13328	1.7057	1.91885	2.0822
623	0.305984	0.28891	0.159362	0.288614	0.360415	0.4272	1.99037	0.451	0.463	0.568	0.454	0.448	0.451	1.56181	1.43644	0.645865	1.46341	1.85195	2.18052	0.445844	0.362166	-0.437165	0.380771	0.616241	0.779563	9.66323	8.17412	1.65254	8.48401	13.5871	18.8359	1.76311	1.69087	1.1338	1.70667	1.91991	2.08328
622.5	0.306054	0.289055	0.159215	0.288672	0.360357	0.427075	1.99197	0.451	0.463	0.568	0.454	0.448	0.451	1.56216	1.43716	0.645269	1.46371	1.85166	2.17988	0.446073	0.362668	-0.438088	0.380972	0.61608	0.779271	9.68319	8.19548	1.65214	8.50106	13.6046	18.8552	1.76402	1.69197	1.13374	1.70753	1.92053	2.08381
622	0.306101	0.288909	0.159274	0.288712	0.360405	0.427128	1.99357	0.451	0.463	0.568	0.454	0.448	0.451	1.5624	1.43643	0.645508	1.46391	1.8519	2.18015	0.446226	0.362163	-0.437717	0.381111	0.616213	0.779395	9.70174	8.20037	1.65602	8.51709	13.6301	18.8902	1.76487	1.69223	1.1344	1.70833	1.92143	2.08477
621.5	0.306127	0.289075	0.159387	0.288736	0.360532	0.427098	1.99517	0.451	0.463	0.568	0.454	0.448	0.451	1.56254	1.43726	0.645966	1.46403	1.85256	2.18	0.446311	0.362737	-0.437008	0.381194	0.616566	0.779324	9.71901	8.22301	1.66104	8.53222	13.6617	18.9179	1.76565	1.69339	1.13526	1.70909	1.92254	2.08554
621	0.306189	0.289221	0.159299	0.289065	0.360664	0.427297	1.99678	0.451	0.463	0.568	0.454	0.448	0.451	1.56285	1.43798	0.64561	1.4657	1.85323	2.18101	0.446514	0.363242	-0.43756	0.382333	0.616932	0.77979	9.73861	8.24458	1.66188	8.56545	13.6937	18.9661	1.76654	1.6945	1.1354	1.71075	1.92367	2.08686
620.5	0.306122	0.289065	0.159363	0.288977	0.360776	0.427269	1.99839	0.451	0.463	0.568	0.454	0.448	0.451	1.56251	1.43721	0.645869	1.46525	1.85381	2.18087	0.446295	0.362703	-0.437158	0.382028	0.617242	0.779725	9.75004	8.24897	1.6659	8.57404	13.7243	18.9942	1.76706	1.69473	1.13609	1.71118	1.92474	2.08764
620	0.30617	0.289107	0.159287	0.289371	0.360862	0.427231	2	0.451	0.463	0.568	0.454	0.448	0.451	1.56276	1.43742	0.645561	1.46725	1.85425	2.18068	0.446451	0.362848	-0.437636	0.383391	0.617481	0.779636	9.76884	8.26468	1.667	8.6113	13.753	19.0214	1.76791	1.69553	1.13628	1.71304	1.92575	2.08839
619.5	0.306167	0.289178	0.159267	0.28936	0.360927	0.427494	2.00161	0.451	0.463	0.568	0.454	0.448	0.451	1.56274	1.43777	0.64548	1.4672	1.85458	2.18202	0.446442	0.363094	-0.437761	0.383353	0.617661	0.780251	9.78442	8.28209	1.66927	8.62455	13.7802	19.0756	1.76862	1.69643	1.13666	1.7137	1.9267	2.08987
619	0.306197	0.28928	0.159342	0.289481	0.360906	0.427539	2.00323	0.451	0.463	0.568	0.454	0.448	0.451	1.56289	1.43828	0.645784	1.46781	1.85448	2.18225	0.44654	0.363446	-0.43729	0.383771	0.617603	0.780356	9.80215	8.30133	1.67354	8.64572	13.8008	19.1105	1.76942	1.69741	1.13739	1.71475	1.92742	2.09083
618.5	0.306315	0.289343	0.15941	0.289539	0.36077	0.427628	2.00485	0.451	0.463	0.568	0.454	0.448	0.451	1.5635	1.43859	0.64606	1.4681	1.85378	2.1827	0.446925	0.363664	-0.436864	0.383971	0.617226	0.780565	9.82558	8.31838	1.67768	8.66317	13.8127	19.1493	1.77047	1.69828	1.13809	1.71561	1.92783	2.09189
618	0.306312	0.289372	0.159344	0.289435	0.360953	0.427513	2.00647	0.451	0.463	0.568	0.454	0.448	0.451	1.56348	1.43874	0.645792	1.46758	1.85472	2.18212	0.446915	0.363764	-0.437278	0.383612	0.617733	0.780296	9.84129	8.33351	1.679	8.67097	13.8491	19.17	1.77118	1.69905	1.13832	1.716	1.9291	2.09245
617.5	0.306322	0.289491	0.159415	0.289559	0.360987	0.42771	2.0081	0.451	0.463	0.568	0.454	0.448	0.451	1.56353	1.43933	0.64608	1.4682	1.85489	2.18312	0.446948	0.364175	-0.436832	0.38404	0.617827	0.780756	9.85788	8.35388	1.68322	8.69246	13.8742	19.2188	1.77193	1.70009	1.13903	1.71706	1.92998	2.09378
617	0.306384	0.2894	0.159491	0.289566	0.361079	0.427722	2.00972	0.451	0.463	0.568	0.454	0.448	0.451	1.56385	1.43887	0.646388	1.46824	1.85537	2.18318	0.44715	0.363861	-0.436356	0.384064	0.618082	0.780784	9.87786	8.36217	1.68756	8.70697	13.9038	19.251	1.77282	1.70051	1.13976	1.71778	1.931	2.09466
616.5	0.306425	0.289609	0.159489	0.289725	0.361145	0.427715	2.01135	0.451	0.463	0.568	0.454	0.448	0.451	1.56406	1.43991	0.64638	1.46905	1.8557	2.18315	0.447284	0.364583	-0.436368	0.384613	0.618265	0.780768	9.89653	8.38784	1.69026	8.73068	13.9314	19.2816	1.77366	1.70182	1.14022	1.71895	1.93196	2.09549
616	0.306443	0.289612	0.159476	0.289776	0.3614	0.427798	2.01299	0.451	0.463	0.568	0.454	0.448	0.451	1.56415	1.43993	0.646327	1.4693	1.85702	2.18357	0.447343	0.364593	-0.43645	0.384789	0.61897	0.780962	9.91377	8.40163	1.69273	8.74794	13.9737	19.3204	1.77443	1.70251	1.14063	1.71979	1.93343	2.09655
615.5	0.306456	0.28963	0.159582	0.289676	0.361388	0.427849	2.01462	0.451	0.463	0.568	0.454	0.448	0.451	1.56422	1.44002	0.646757	1.4688	1.85695	2.18383	0.447385	0.364656	-0.435785	0.384444	0.618937	0.781081	9.93073	8.41633	1.69773	8.75611	13.9955	19.3565	1.77519	1.70326	1.14148	1.7202	1.93418	2.09752
615	0.306529	0.289755	0.159563	0.289882	0.361464	0.428011	2.01626	0.451	0.463	0.568	0.454	0.448	0.451	1.56459	1.44064	0.64668	1.46984	1.85734	2.18466	0.447623	0.365087	-0.435904	0.385155	0.619148	0.78146	9.95162	8.4373	1.70009	8.78283	14.0242	19.4026	1.77612	1.70432	1.14187	1.72151	1.93517	2.09877
614.5	0.306529	0.289848	0.159673	0.289924	0.361412	0.428085	2.0179	0.451	0.463	0.568	0.454	0.448	0.451	1.56459	1.4411	0.647125	1.47006	1.85708	2.18504	0.447623	0.365408	-0.435215	0.3853	0.619004	0.781633	9.96782	8.45647	1.7052	8.79968	14.043	19.4409	1.77685	1.70529	1.14273	1.72233	1.93582	2.09981
614	0.306582	0.289727	0.159669	0.290046	0.361508	0.42807	2.01954	0.451	0.463	0.568	0.454	0.448	0.451	1.56486	1.4405	0.647109	1.47067	1.85757	2.18496	0.447796	0.36499	-0.43524	0.385721	0.619269	0.781598	9.98752	8.46317	1.7079	8.82144	14.0733	19.4712	1.77772	1.70562	1.14318	1.7234	1.93686	2.10062
613.5	0.306545	0.290029	0.159688	0.290001	0.361597	0.428295	2.02119	0.451	0.463	0.568	0.454	0.448	0.451	1.56467	1.442	0.647186	1.47045	1.85803	2.18611	0.447676	0.366032	-0.435121	0.385565	0.619515	0.782123	10.0014	8.49465	1.71109	8.83308	14.1032	19.5235	1.77834	1.70721	1.14372	1.72396	1.93789	2.10203
613	0.306646	0.289974	0.15969	0.290109	0.361606	0.428192	2.02284	0.451	0.463	0.568	0.454	0.448	0.451	1.56519	1.44173	0.647194	1.47099	1.85807	2.18558	0.448005	0.365843	-0.435109	0.385938	0.61954	0.781883	10.0243	8.50529	1.71393	8.85409	14.1269	19.546	1.77936	1.70774	1.14419	1.72499	1.93871	2.10264
612.5	0.30668	0.290147	0.159745	0.290238	0.361745	0.428262	2.02449	0.451	0.463	0.568	0.454	0.448	0.451	1.56536	1.44259	0.647417	1.47165	1.85879	2.18594	0.448116	0.366439	-0.434764	0.386382	0.619925	0.782046	10.0429	8.52935	1.71791	8.87644	14.1609	19.5843	1.78018	1.70895	1.14485	1.72608	1.93987	2.10367
612	0.306686	0.29008	0.159977	0.290233	0.361822	0.428388	2.02614	0.451	0.463	0.568	0.454	0.448	0.451	1.56539	1.44226	0.648357	1.47162	1.85918	2.18658	0.448135	0.366208	-0.433313	0.386365	0.620137	0.78234	10.0597	8.53935	1.72572	8.89064	14.1901	19.6278	1.78093	1.70945	1.14615	1.72677	1.94087	2.10484
611.5	0.306777	0.29026	0.159925	0.290211	0.361928	0.428421	2.0278	0.451	0.463	0.568	0.454	0.448	0.451	1.56586	1.44315	0.648147	1.47151	1.85973	2.18675	0.448432	0.366828	-0.433638	0.386289	0.62043	0.782417	10.0822	8.56394	1.72742	8.90384	14.2216	19.663	1.78192	1.71068	1.14643	1.72741	1.94195	2.10578
611	0.306753	0.290151	0.159843	0.290272	0.362005	0.428448	2.02946	0.451	0.463	0.568	0.454	0.448	0.451	1.56573	1.44261	0.647814	1.47182	1.86012	2.18689	0.448354	0.366453	-0.434151	0.3865	0.620643	0.78248	10.0971	8.57152	1.72847	8.92216	14.251	19.6977	1.78258	1.71106	1.14661	1.72829	1.94295	2.1067
610.5	0.306782	0.290276	0.159847	0.290398	0.362117	0.42856	2.03112	0.451	0.463	0.568	0.454	0.448	0.451	1.56588	1.44323	0.647831	1.47246	1.8607	2.18746	0.448448	0.366883	-0.434126	0.386934	0.620952	0.782742	10.1155	8.59296	1.73139	8.94454	14.2832	19.7403	1.78339	1.71213	1.14709	1.72938	1.94404	2.10784
610	0.306814	0.290392	0.160007	0.290482	0.362137	0.428567	2.03279	0.451	0.463	0.568	0.454	0.448	0.451	1.56604	1.44381	0.648479	1.47288	1.8608	2.1875	0.448553	0.367283	-0.433126	0.387223	0.621008	0.782758	10.1342	8.61394	1.7377	8.9644	14.3082	19.7733	1.78422	1.71317	1.14814	1.73034	1.94489	2.10872
609.5	0.306923	0.290492	0.160018	0.290365	0.362226	0.428637	2.03445	0.451	0.463	0.568	0.454	0.448	0.451	1.5666	1.4443	0.648524	1.47229	1.86126	2.18785	0.448908	0.367627	-0.433057	0.38682	0.621253	0.782921	10.1581	8.63402	1.74079	8.97188	14.3387	19.8122	1.78527	1.71417	1.14865	1.7307	1.94593	2.10976
609	0.306915	0.29049	0.160115	0.290612	0.362397	0.428771	2.03612	0.451	0.463	0.568	0.454	0.448	0.451	1.56656	1.44429	0.648917	1.47354	1.86214	2.18854	0.448882	0.36762	-0.432451	0.38767	0.621725	0.783234	10.1743	8.64808	1.74577	9.00191	14.3758	19.8572	1.78598	1.71487	1.14947	1.73214	1.94719	2.11096
608.5	0.306895	0.290433	0.160086	0.290806	0.362369	0.428784	2.0378	0.451	0.463	0.568	0.454	0.448	0.451	1.56646	1.44401	0.648799	1.47453	1.86199	2.1886	0.448817	0.367424	-0.432632	0.388337	0.621648	0.783264	10.1897	8.6589	1.74801	9.02875	14.3972	19.891	1.78665	1.7154	1.14984	1.73343	1.94791	2.11186
608	0.306925	0.290756	0.160137	0.290857	0.362198	0.428882	2.03947	0.451	0.463	0.568	0.454	0.448	0.451	1.56661	1.44562	0.649006	1.47479	1.86112	2.18911	0.448914	0.368536	-0.432313	0.388513	0.621176	0.783493	10.2084	8.69245	1.752	9.04678	14.4073	19.9329	1.78747	1.71706	1.15049	1.7343	1.94825	2.11297
607.5	0.307005	0.290636	0.160045	0.290834	0.362248	0.428881	2.04115	0.451	0.463	0.568	0.454	0.448	0.451	1.56702	1.44502	0.648633	1.47467	1.86137	2.1891	0.449175	0.368123	-0.432888	0.388434	0.621314	0.78349	10.2306	8.69958	1.75287	9.06025	14.435	19.9656	1.78844	1.71741	1.15063	1.73494	1.94919	2.11383
607	0.307039	0.290789	0.160178	0.290996	0.362442	0.429084	2.04283	0.451	0.463	0.568	0.454	0.448	0.451	1.56719	1.44578	0.649172	1.47549	1.86237	2.19014	0.449286	0.368649	-0.432057	0.388991	0.62185	0.783964	10.2497	8.72309	1.75868	9.08529	14.4743	20.0174	1.78928	1.71857	1.15159	1.73614	1.95052	2.1152
606.5	0.307038	0.290655	0.160121	0.290981	0.362542	0.428956	2.04452	0.451	0.463	0.568	0.454	0.448	0.451	1.56719	1.44511	0.648941	1.47541	1.86288	2.18948	0.449282	0.368188	-0.432413	0.388939	0.622125	0.783665	10.2665	8.72943	1.76032	9.09934	14.5062	20.0385	1.79001	1.71888	1.15186	1.73681	1.95159	2.11576
606	0.307109	0.290712	0.160193	0.291174	0.362602	0.428916	2.0462	0.451	0.463	0.568	0.454	0.448	0.451	1.56755	1.4454	0.649233	1.47639	1.86319	2.18928	0.449514	0.368384	-0.431964	0.389602	0.622291	0.783572	10.2882	8.74727	1.76481	9.12646	14.5349	20.0678	1.79096	1.71976	1.15259	1.7381	1.95256	2.11653
605.5	0.307126	0.290868	0.160301	0.29117	0.36254	0.429309	2.04789	0.451	0.463	0.568	0.454	0.448	0.451	1.56764	1.44617	0.649671	1.47637	1.86287	2.19128	0.449569	0.368921	-0.43129	0.389588	0.62212	0.784488	10.3064	8.77113	1.77012	9.14129	14.554	20.1378	1.79175	1.72093	1.15345	1.73881	1.95319	2.11838
605	0.30716	0.290915	0.160306	0.291504	0.362634	0.429185	2.04959	0.451	0.463	0.568	0.454	0.448	0.451	1.56781	1.44641	0.649691	1.47807	1.86336	2.19065	0.44968	0.369082	-0.431259	0.390735	0.622379	0.784199	10.3257	8.78847	1.77315	9.17742	14.5856	20.1595	1.79259	1.72178	1.15395	1.74052	1.95425	2.11895
604.5	0.30716	0.291036	0.160318	0.291487	0.362611	0.42938	2.05128	0.451	0.463	0.568	0.454	0.448	0.451	1.56781	1.44701	0.64974	1.47798	1.86324	2.19165	0.44968	0.369498	-0.431184	0.390677	0.622316	0.784653	10.3428	8.81034	1.77635	9.19154	14.6079	20.2112	1.79333	1.72285	1.15447	1.74119	1.955	2.1203
604	0.307259	0.290897	0.160313	0.291698	0.362674	0.429306	2.05298	0.451	0.463	0.568	0.454	0.448	0.451	1.56832	1.44632	0.649719	1.47905	1.86356	2.19127	0.450002	0.369021	-0.431215	0.3914	0.622489	0.784481	10.3666	8.81651	1.77918	9.22009	14.6372	20.2377	1.79436	1.72315	1.15493	1.74254	1.95598	2.121
603.5	0.307302	0.290918	0.16049	0.291525	0.362903	0.429186	2.05468	0.451	0.463	0.568	0.454	0.448	0.451	1.56853	1.44642	0.650437	1.47817	1.86474	2.19066	0.450142	0.369093	-0.430111	0.390807	0.623121	0.784201	10.3867	8.8324	1.78607	9.22443	14.6799	20.2599	1.79523	1.72393	1.15604	1.74275	1.95741	2.12158
603	0.307326	0.291049	0.160303	0.291884	0.362792	0.429366	2.05638	0.451	0.463	0.568	0.454	0.448	0.451	1.56866	1.44707	0.649679	1.47999	1.86417	2.19158	0.45022	0.369543	-0.431277	0.392038	0.622815	0.784621	10.4055	8.85502	1.78487	9.2625	14.6953	20.3105	1.79604	1.72503	1.15585	1.74454	1.95792	2.1229
602.5	0.307358	0.29118	0.160365	0.291734	0.362654	0.429475	2.05809	0.451	0.463	0.568	0.454	0.448	0.451	1.56882	1.44772	0.64993	1.47923	1.86346	2.19213	0.450324	0.369993	-0.430891	0.391524	0.622434	0.784875	10.425	8.87771	1.78921	9.26835	14.7085	20.3546	1.79688	1.72614	1.15655	1.74482	1.95836	2.12405
602	0.307275	0.291085	0.160418	0.291627	0.362954	0.429502	2.0598	0.451	0.463	0.568	0.454	0.448	0.451	1.5684	1.44725	0.650145	1.47869	1.865	2.19227	0.450054	0.369667	-0.43056	0.391157	0.623261	0.784937	10.4367	8.88666	1.79337	9.27694	14.7573	20.391	1.79738	1.72657	1.15722	1.74522	1.95998	2.125
601.5	0.307424	0.29105	0.160526	0.291871	0.362965	0.429632	2.06151	0.451	0.463	0.568	0.454	0.448	0.451	1.56916	1.44708	0.650582	1.47993	1.86506	2.19293	0.450539	0.369546	-0.429887	0.391993	0.623291	0.78524	10.4642	8.8993	1.79877	9.30793	14.7828	20.4373	1.79857	1.72719	1.1581	1.74668	1.96083	2.12621
601	0.307467	0.291272	0.160478	0.291849	0.363067	0.429538	2.06323	0.451	0.463	0.568	0.454	0.448	0.451	1.56938	1.44818	0.650388	1.47982	1.86558	2.19245	0.450679	0.370309	-0.430186	0.391918	0.623572	0.785021	10.4845	8.92772	1.80069	9.32201	14.8157	20.4623	1.79944	1.72856	1.1584	1.74734	1.96192	2.12686
600.5	0.307496	0.291187	0.160503	0.292031	0.362993	0.429701	2.06495	0.451	0.463	0.568	0.454	0.448	0.451	1.56953	1.44776	0.650489	1.48074	1.8652	2.19329	0.450773	0.370017	-0.43003	0.392541	0.623369	0.785401	10.504	8.93737	1.80425	9.34919	14.8343	20.512	1.80027	1.72903	1.15898	1.74861	1.96253	2.12815
600	0.307501	0.291377	0.160661	0.292251	0.363205	0.429576	2.06667	0.451	0.463	0.568	0.454	0.448	0.451	1.56955	1.4487	0.65113	1.48185	1.86629	2.19265	0.450789	0.370669	-0.429047	0.393294	0.623952	0.78511	10.5218	8.96396	1.81082	9.3789	14.8764	20.5342	1.80104	1.73031	1.16003	1.75	1.96392	2.12873
599.5	0.307564	0.291451	0.160512	0.292353	0.363204	0.429657	2.06839	0.451	0.463	0.568	0.454	0.448	0.451	1.56987	1.44907	0.650526	1.48237	1.86628	2.19306	0.450994	0.370923	-0.429974	0.393643	0.62395	0.785298	10.5437	8.98348	1.81048	9.40111	14.9012	20.5763	1.80197	1.73126	1.15997	1.75103	1.96474	2.12981
599	0.307585	0.291542	0.160601	0.292517	0.363296	0.42987	2.07012	0.451	0.463	0.568	0.454	0.448	0.451	1.56998	1.44952	0.650886	1.4832	1.86676	2.19415	0.451062	0.371235	-0.42942	0.394204	0.624203	0.785794	10.5628	9.00411	1.81552	9.42738	14.9336	20.6311	1.80279	1.73225	1.16078	1.75226	1.96581	2.13123
598.5	0.307597	0.291618	0.160621	0.29255	0.363234	0.429943	2.07185	0.451	0.463	0.568	0.454	0.448	0.451	1.57004	1.4499	0.650968	1.48337	1.86644	2.19452	0.451101	0.371496	-0.429296	0.394317	0.624032	0.785964	10.5812	9.02386	1.819	9.44527	14.9535	20.6726	1.80357	1.7332	1.16134	1.75309	1.96646	2.1323
598	0.307592	0.291596	0.160735	0.292506	0.36331	0.429948	2.07358	0.451	0.463	0.568	0.454	0.448	0.451	1.57002	1.44979	0.65143	1.48315	1.86683	2.19455	0.451085	0.371421	-0.428586	0.394166	0.624242	0.785975	10.5986	9.03759	1.82463	9.45822	14.9848	20.7076	1.80431	1.73386	1.16224	1.75369	1.96749	2.13321
597.5	0.307608	0.291705	0.160633	0.292666	0.363528	0.430088	2.07531	0.451	0.463	0.568	0.454	0.448	0.451	1.5701	1.45033	0.651016	1.48396	1.86795	2.19526	0.451137	0.371794	-0.429221	0.394713	0.624841	0.786301	10.6175	9.05949	1.82537	9.48443	15.0279	20.7558	1.80512	1.73491	1.16235	1.7549	1.9689	2.13444
597	0.307731	0.291638	0.160653	0.292765	0.363342	0.430073	2.07705	0.451	0.463	0.568	0.454	0.448	0.451	1.57072	1.45	0.651097	1.48446	1.86699	2.19518	0.451537	0.371565	-0.429096	0.395051	0.62433	0.786266	10.6438	9.07051	1.82888	9.50675	15.0377	20.7891	1.80623	1.73543	1.16291	1.75593	1.96922	2.1353
596.5	0.307768	0.291686	0.160822	0.292817	0.363262	0.430169	2.07879	0.451	0.463	0.568	0.454	0.448	0.451	1.57091	1.45024	0.651782	1.48472	1.86658	2.19567	0.451657	0.371729	-0.428045	0.395229	0.624109	0.786489	10.6642	9.08871	1.83581	9.52607	15.0563	20.8333	1.8071	1.7363	1.16401	1.75682	1.96983	2.13643
596	0.307827	0.291871	0.16069	0.292906	0.363524	0.430231	2.08054	0.451	0.463	0.568	0.454	0.448	0.451	1.57121	1.45116	0.651247	1.48518	1.86793	2.19599	0.451849	0.372363	-0.428866	0.395533	0.62483	0.786633	10.6862	9.11552	1.83587	9.54787	15.1033	20.8743	1.80803	1.73758	1.16402	1.75783	1.97137	2.13748
595.5	0.307827	0.291905	0.160955	0.292998	0.363598	0.430281	2.08228	0.451	0.463	0.568	0.454	0.448	0.451	1.57121	1.45133	0.652321	1.48564	1.86831	2.19625	0.451849	0.37248	-0.427218	0.395847	0.625034	0.786749	10.7041	9.13296	1.84503	9.56992	15.1348	20.9142	1.80879	1.73841	1.16547	1.75884	1.9724	2.13851
595	0.30785	0.291869	0.160874	0.293016	0.363608	0.43015	2.08403	0.451	0.463	0.568	0.454	0.448	0.451	1.57133	1.45115	0.651993	1.48573	1.86836	2.19558	0.451924	0.372356	-0.427722	0.395908	0.625061	0.786445	10.7237	9.14606	1.84627	9.58718	15.1611	20.9366	1.80962	1.73904	1.16567	1.75964	1.97325	2.13908
594.5	0.30794	0.292009	0.160795	0.293178	0.363653	0.43026	2.08579	0.451	0.463	0.568	0.454	0.448	0.451	1.57179	1.45185	0.651673	1.48655	1.86859	2.19614	0.452216	0.372836	-0.428213	0.396461	0.625185	0.786701	10.748	9.17024	1.84756	9.61394	15.1904	20.9826	1.81064	1.74018	1.16587	1.76086	1.9742	2.14025
594	0.308019	0.292072	0.160922	0.293248	0.363787	0.430209	2.08754	0.451	0.463	0.568	0.454	0.448	0.451	1.57219	1.45216	0.652187	1.48691	1.86928	2.19588	0.452472	0.373052	-0.427423	0.3967	0.625554	0.786582	10.7717	9.18965	1.8536	9.63473	15.2272	21.0129	1.81164	1.7411	1.16682	1.76181	1.9754	2.14103
593.5	0.308008	0.292014	0.160997	0.293322	0.36388	0.430357	2.0893	0.451	0.463	0.568	0.454	0.448	0.451	1.57214	1.45187	0.652491	1.48728	1.86976	2.19663	0.452437	0.372853	-0.426957	0.396952	0.625809	0.786926	10.7891	9.20149	1.85845	9.65584	15.2606	21.0629	1.81237	1.74166	1.16758	1.76278	1.97648	2.1423
593	0.307969	0.292106	0.160928	0.293391	0.363983	0.430466	2.09106	0.451	0.463	0.568	0.454	0.448	0.451	1.57194	1.45233	0.652212	1.48763	1.87029	2.19719	0.45231	0.373168	-0.427386	0.397187	0.626092	0.787179	10.8045	9.22282	1.85999	9.67668	15.295	21.1091	1.81301	1.74267	1.16783	1.76373	1.9776	2.14347
592.5	0.308092	0.292185	0.160999	0.293394	0.364049	0.430534	2.09283	0.451	0.463	0.568	0.454	0.448	0.451	1.57257	1.45272	0.652499	1.48765	1.87063	2.19754	0.452709	0.373438	-0.426945	0.397198	0.626274	0.787337	10.8314	9.24339	1.86478	9.69322	15.3264	21.1514	1.81414	1.74364	1.16858	1.76448	1.97861	2.14454
592	0.308122	0.292191	0.16104	0.293548	0.364035	0.430526	2.09459	0.451	0.463	0.568	0.454	0.448	0.451	1.57272	1.45275	0.652666	1.48843	1.87055	2.1975	0.452807	0.373459	-0.42669	0.397722	0.626235	0.787319	10.8518	9.25939	1.86888	9.7198	15.3511	21.1864	1.815	1.7444	1.16922	1.76569	1.97941	2.14543
591.5	0.308143	0.292249	0.161079	0.293573	0.364086	0.430521	2.09637	0.451	0.463	0.568	0.454	0.448	0.451	1.57283	1.45304	0.652824	1.48856	1.87082	2.19747	0.452875	0.373657	-0.426448	0.397807	0.626375	0.787307	10.8717	9.27873	1.87295	9.73789	15.3814	21.2217	1.81583	1.74531	1.16985	1.76651	1.98038	2.14632
591	0.308155	0.292385	0.16106	0.293761	0.364329	0.430987	2.09814	0.451	0.463	0.568	0.454	0.448	0.451	1.57289	1.45372	0.652747	1.48951	1.87207	2.19985	0.452914	0.374123	-0.426566	0.398448	0.627042	0.788389	10.8909	9.30309	1.87568	9.76687	15.428	21.3037	1.81663	1.74645	1.17028	1.76782	1.98188	2.14839
590.5	0.308235	0.292508	0.161112	0.293813	0.364361	0.430951	2.09992	0.451	0.463	0.568	0.454	0.448	0.451	1.5733	1.45433	0.652957	1.48977	1.87223	2.19967	0.453173	0.374543	-0.426243	0.398625	0.62713	0.788305	10.915	9.32669	1.88007	9.78689	15.4569	21.3362	1.81763	1.74756	1.17096	1.76873	1.98281	2.14921
590	0.308301	0.292669	0.161102	0.29398	0.364427	0.431063	2.10169	0.451	0.463	0.568	0.454	0.448	0.451	1.57363	1.45513	0.652917	1.49062	1.87257	2.20024	0.453388	0.375094	-0.426305	0.399193	0.627311	0.788565	10.9382	9.3528	1.88302	9.81463	15.4887	21.3835	1.8186	1.74878	1.17142	1.76998	1.98383	2.1504
589.5	0.308319	0.292512	0.161135	0.294083	0.364448	0.430919	2.10348	0.451	0.463	0.568	0.454	0.448	0.451	1.57373	1.45435	0.653051	1.49114	1.87268	2.1995	0.453446	0.374557	-0.426101	0.399543	0.627369	0.788231	10.9581	9.35862	1.88699	9.83817	15.5168	21.4055	1.81942	1.74905	1.17204	1.77104	1.98473	2.15095
589	0.308394	0.292824	0.161217	0.29421	0.364572	0.431063	2.10526	0.451	0.463	0.568	0.454	0.448	0.451	1.57411	1.4559	0.653383	1.49179	1.87331	2.20024	0.453689	0.375623	-0.425592	0.399975	0.627709	0.788565	10.982	9.39452	1.89212	9.8634	15.5537	21.4562	1.82042	1.75073	1.17284	1.77218	1.98591	2.15223
588.5	0.308461	0.292764	0.161266	0.29423	0.364555	0.431316	2.10705	0.451	0.463	0.568	0.454	0.448	0.451	1.57445	1.4556	0.653582	1.49189	1.87323	2.20153	0.453906	0.375418	-0.425288	0.400043	0.627663	0.789152	11.0055	9.40664	1.89649	9.88151	15.5787	21.5179	1.82139	1.75129	1.17351	1.77299	1.9867	2.15377
588	0.308441	0.292904	0.161285	0.294445	0.364516	0.431176	2.10884	0.451	0.463	0.568	0.454	0.448	0.451	1.57435	1.4563	0.653659	1.49298	1.87303	2.20081	0.453842	0.375896	-0.42517	0.400773	0.627556	0.788827	11.0228	9.43166	1.90016	9.91279	15.6019	21.5405	1.8221	1.75246	1.17408	1.77439	1.98744	2.15434
587.5	0.30845	0.29291	0.161282	0.294582	0.364581	0.431269	2.11064	0.451	0.463	0.568	0.454	0.448	0.451	1.57439	1.45633	0.653646	1.49367	1.87336	2.20129	0.453871	0.375917	-0.425189	0.401239	0.627734	0.789043	11.0422	9.4481	1.90333	9.93891	15.634	21.5865	1.8229	1.75322	1.17457	1.77556	1.98846	2.15549
587	0.308466	0.29298	0.161408	0.294489	0.364506	0.431227	2.11244	0.451	0.463	0.568	0.454	0.448	0.451	1.57448	1.45667	0.654157	1.4932	1.87298	2.20107	0.453923	0.376156	-0.424408	0.400923	0.627528	0.788946	11.0621	9.46873	1.90955	9.94957	15.6542	21.6191	1.82373	1.75418	1.17553	1.77603	1.98911	2.1563
586.5	0.308512	0.292991	0.161355	0.294522	0.364596	0.431432	2.11424	0.451	0.463	0.568	0.454	0.448	0.451	1.57471	1.45673	0.653942	1.49337	1.87344	2.20212	0.454072	0.376193	-0.424736	0.401035	0.627775	0.789421	11.0843	9.48559	1.91155	9.96877	15.6887	21.6765	1.82464	1.75496	1.17584	1.77689	1.9902	2.15773
586	0.308509	0.293043	0.161511	0.29468	0.364854	0.431641	2.11604	0.451	0.463	0.568	0.454	0.448	0.451	1.5747	1.45699	0.654575	1.49417	1.87476	2.20319	0.454062	0.376371	-0.42377	0.401571	0.628482	0.789905	11.103	9.50516	1.91852	9.99651	15.7377	21.7346	1.82541	1.75586	1.17691	1.77812	1.99175	2.15917
585.5	0.308608	0.293208	0.161473	0.294751	0.364939	0.431671	2.11785	0.451	0.463	0.568	0.454	0.448	0.451	1.5752	1.45781	0.654421	1.49453	1.8752	2.20334	0.454383	0.376934	-0.424005	0.401812	0.628715	0.789975	11.1291	9.53213	1.92089	10.0184	15.7719	21.7747	1.82648	1.7571	1.17727	1.7791	1.99283	2.16017
585	0.308681	0.293192	0.161525	0.29485	0.364952	0.431682	2.11966	0.451	0.463	0.568	0.454	0.448	0.451	1.57557	1.45773	0.654631	1.49503	1.87527	2.2034	0.454619	0.376879	-0.423683	0.402148	0.628751	0.79	11.1534	9.54739	1.92542	10.0423	15.8	21.8131	1.82748	1.75781	1.17796	1.78016	1.99372	2.16112
584.5	0.308725	0.293304	0.161597	0.294909	0.364978	0.431744	2.12147	0.451	0.463	0.568	0.454	0.448	0.451	1.5758	1.45828	0.654923	1.49533	1.8754	2.20371	0.454762	0.377261	-0.423238	0.402348	0.628822	0.790144	11.1757	9.57104	1.93043	10.0635	15.8293	21.8567	1.82839	1.75889	1.17873	1.7811	1.99464	2.1622
584	0.3087	0.293286	0.161459	0.294989	0.365029	0.431596	2.12329	0.451	0.463	0.568	0.454	0.448	0.451	1.57567	1.4582	0.654364	1.49574	1.87566	2.20296	0.454681	0.377199	-0.424092	0.402619	0.628962	0.789801	11.1931	9.58626	1.93044	10.0862	15.8609	21.8791	1.8291	1.75959	1.17873	1.7821	1.99564	2.16276
583.5	0.308745	0.293432	0.161669	0.29508	0.365185	0.43184	2.12511	0.451	0.463	0.568	0.454	0.448	0.451	1.5759	1.45892	0.655215	1.4962	1.87646	2.2042	0.454827	0.377697	-0.422792	0.402928	0.629389	0.790366	11.2155	9.61225	1.93878	10.1097	15.9016	21.9414	1.83002	1.76078	1.18	1.78314	1.99692	2.16429
583	0.308824	0.293513	0.161615	0.295279	0.365137	0.431786	2.12693	0.451	0.463	0.568	0.454	0.448	0.451	1.5763	1.45932	0.654996	1.49721	1.87622	2.20393	0.455083	0.377973	-0.423126	0.403602	0.629258	0.790241	11.2405	9.63407	1.94081	10.1408	15.9247	21.9736	1.83103	1.76178	1.18031	1.7845	1.99764	2.16509
582.5	0.308826	0.29354	0.16158	0.295374	0.365303	0.431869	2.12876	0.451	0.463	0.568	0.454	0.448	0.451	1.57631	1.45946	0.654854	1.49769	1.87707	2.20435	0.455089	0.378065	-0.423343	0.403923	0.629712	0.790433	11.26	9.65239	1.9433	10.1647	15.9666	22.0198	1.83183	1.76262	1.18069	1.78556	1.99896	2.16622
582	0.308858	0.293542	0.16175	0.295505	0.365182	0.431989	2.13058	0.451	0.463	0.568	0.454	0.448	0.451	1.57648	1.45947	0.655543	1.49835	1.87645	2.20496	0.455193	0.378072	-0.422291	0.404367	0.629381	0.790711	11.2817	9.66911	1.95074	10.1912	15.9835	22.0699	1.83271	1.76338	1.18182	1.78672	1.99948	2.16745
581.5	0.308901	0.293666	0.161725	0.295556	0.365245	0.431991	2.13242	0.451	0.463	0.568	0.454	0.448	0.451	1.5767	1.46008	0.655442	1.49861	1.87677	2.20497	0.455332	0.378494	-0.422446	0.404539	0.629553	0.790716	11.3042	9.69393	1.95349	10.2123	16.0165	22.1081	1.83362	1.76451	1.18223	1.78764	2.00051	2.16839
581	0.30896	0.293771	0.16165	0.295711	0.365462	0.432198	2.13425	0.451	0.463	0.568	0.454	0.448	0.451	1.577	1.46061	0.655138	1.4994	1.87789	2.20603	0.455523	0.378852	-0.42291	0.405064	0.630147	0.791195	11.328	9.71757	1.95504	10.2406	16.0631	22.1674	1.83459	1.76559	1.18247	1.78888	2.00197	2.16984
580.5	0.30897	0.293817	0.161708	0.296014	0.3655	0.432175	2.13609	0.451	0.463	0.568	0.454	0.448	0.451	1.57705	1.46084	0.655373	1.50093	1.87808	2.20591	0.455555	0.379008	-0.422551	0.406088	0.630251	0.791142	11.3483	9.73736	1.95982	10.2793	16.0942	22.2032	1.83541	1.76649	1.18319	1.79057	2.00294	2.17072
580	0.309017	0.293808	0.16173	0.296056	0.365612	0.432181	2.13793	0.451	0.463	0.568	0.454	0.448	0.451	1.57729	1.46079	0.655462	1.50115	1.87866	2.20594	0.455707	0.378978	-0.422415	0.40623	0.630558	0.791155	11.3713	9.75356	1.96373	10.2999	16.1318	22.2421	1.83634	1.76722	1.18378	1.79147	2.00411	2.17167
579.5	0.309035	0.293894	0.161848	0.296023	0.365751	0.432351	2.13978	0.451	0.463	0.568	0.454	0.448	0.451	1.57738	1.46122	0.65594	1.50098	1.87937	2.20681	0.455766	0.37927	-0.421685	0.406118	0.630938	0.791549	11.3922	9.77612	1.97	10.3154	16.1719	22.2981	1.83718	1.76824	1.18472	1.79214	2.00535	2.17304
579	0.309096	0.293941	0.161872	0.296173	0.365701	0.432401	2.14162	0.451	0.463	0.568	0.454	0.448	0.451	1.57769	1.46145	0.656038	1.50174	1.87912	2.20707	0.455963	0.37943	-0.421537	0.406625	0.630801	0.791664	11.4164	9.79615	1.97398	10.3437	16.1955	22.3417	1.83816	1.76915	1.18532	1.79337	2.00608	2.1741
578.5	0.309113	0.293962	0.161928	0.296191	0.365822	0.432403	2.14347	0.451	0.463	0.568	0.454	0.448	0.451	1.57778	1.46156	0.656265	1.50183	1.87974	2.20708	0.456018	0.379502	-0.421191	0.406686	0.631132	0.791669	11.4374	9.81449	1.97877	10.3629	16.2342	22.3806	1.839	1.76997	1.18604	1.7942	2.00728	2.17504
578	0.309213	0.294057	0.161978	0.296273	0.36572	0.43257	2.14533	0.451	0.463	0.568	0.454	0.448	0.451	1.57829	1.46203	0.656467	1.50225	1.87921	2.20793	0.456341	0.379825	-0.420883	0.406962	0.630853	0.792055	11.4646	9.83783	1.98342	10.3865	16.2532	22.4367	1.84009	1.77103	1.18673	1.79522	2.00787	2.1764
577.5	0.309288	0.294236	0.162055	0.296509	0.365748	0.432623	2.14719	0.451	0.463	0.568	0.454	0.448	0.451	1.57867	1.46292	0.656779	1.50344	1.87936	2.2082	0.456584	0.380433	-0.420407	0.407759	0.63093	0.792178	11.4901	9.86688	1.98874	10.4211	16.2839	22.481	1.84111	1.77233	1.18753	1.79671	2.00881	2.17748
577	0.309227	0.294073	0.162038	0.296593	0.365893	0.432756	2.14905	0.451	0.463	0.568	0.454	0.448	0.451	1.57836	1.46211	0.65671	1.50387	1.8801	2.20888	0.456387	0.379879	-0.420512	0.408042	0.631326	0.792485	11.5055	9.87304	1.99177	10.4451	16.3251	22.5339	1.84173	1.77261	1.18798	1.79775	2.01008	2.17876
576.5	0.309274	0.294297	0.16199	0.296679	0.365829	0.432679	2.15091	0.451	0.463	0.568	0.454	0.448	0.451	1.5786	1.46322	0.656516	1.50431	1.87977	2.20849	0.456539	0.380641	-0.420809	0.408332	0.631151	0.792307	11.5289	9.90524	1.99405	10.4693	16.3477	22.5649	1.84267	1.77405	1.18832	1.79879	2.01078	2.17951
576	0.309295	0.294275	0.161979	0.296647	0.365878	0.432685	2.15278	0.451	0.463	0.568	0.454	0.448	0.451	1.57871	1.46311	0.656471	1.50414	1.88002	2.20852	0.456606	0.380566	-0.420876	0.408224	0.631285	0.792321	11.5505	9.92096	1.99724	10.4852	16.3804	22.6047	1.84353	1.77476	1.1888	1.79947	2.01178	2.18047
575.5	0.309432	0.294396	0.162019	0.296682	0.366051	0.432791	2.15465	0.451	0.463	0.568	0.454	0.448	0.451	1.57941	1.46371	0.656633	1.50432	1.88091	2.20906	0.457049	0.380977	-0.420629	0.408342	0.631758	0.792566	11.5809	9.94638	2.0017	10.5059	16.4244	22.6551	1.84474	1.77589	1.18946	1.80036	2.01313	2.18168
575	0.309415	0.294523	0.162167	0.297017	0.365964	0.432856	2.15652	0.451	0.463	0.568	0.454	0.448	0.451	1.57932	1.46435	0.657233	1.50602	1.88047	2.20939	0.456994	0.381408	-0.419716	0.40947	0.63152	0.792716	11.5997	9.97229	2.00885	10.548	16.4452	22.7014	1.84549	1.77705	1.19052	1.80216	2.01377	2.1828
574.5	0.309485	0.294552	0.162168	0.29707	0.366046	0.432893	2.1584	0.451	0.463	0.568	0.454	0.448	0.451	1.57968	1.46449	0.657237	1.50629	1.88089	2.20958	0.457221	0.381507	-0.41971	0.409649	0.631744	0.792802	11.6252	9.99162	2.01237	10.5701	16.4812	22.7448	1.8465	1.77791	1.19104	1.8031	2.01487	2.18384
574	0.309477	0.294634	0.162209	0.297212	0.366111	0.433103	2.16028	0.451	0.463	0.568	0.454	0.448	0.451	1.57964	1.4649	0.657403	1.50701	1.88122	2.21065	0.457195	0.381785	-0.419457	0.410127	0.631922	0.793287	11.6448	10.0146	2.0169	10.5987	16.5158	22.8065	1.84728	1.77893	1.19171	1.80432	2.01593	2.18532
573.5	0.309488	0.294646	0.162206	0.297239	0.366271	0.433212	2.16216	0.451	0.463	0.568	0.454	0.448	0.451	1.57969	1.46496	0.657391	1.50715	1.88204	2.21121	0.45723	0.381826	-0.419476	0.410218	0.632359	0.793538	11.666	10.0329	2.02034	10.6191	16.5591	22.8578	1.84812	1.77974	1.19222	1.80519	2.01725	2.18655
573	0.309583	0.294663	0.162219	0.297335	0.366133	0.433423	2.16405	0.451	0.463	0.568	0.454	0.448	0.451	1.58018	1.46504	0.657444	1.50763	1.88134	2.21228	0.457537	0.381884	-0.419396	0.410541	0.631982	0.794025	11.6935	10.0516	2.02419	10.6445	16.5755	22.9201	1.84921	1.78057	1.19279	1.80626	2.01775	2.18803
572.5	0.309642	0.294687	0.162265	0.29743	0.366156	0.433266	2.16594	0.451	0.463	0.568	0.454	0.448	0.451	1.58048	1.46516	0.65763	1.50811	1.88145	2.21148	0.457728	0.381965	-0.419112	0.41086	0.632045	0.793663	11.7184	10.0708	2.02888	10.6699	16.6065	22.9435	1.85019	1.78142	1.19348	1.80734	2.01869	2.18859
572	0.309716	0.294729	0.162259	0.297439	0.366365	0.433478	2.16783	0.451	0.463	0.568	0.454	0.448	0.451	1.58086	1.46537	0.657606	1.50816	1.88253	2.21256	0.457967	0.382108	-0.419149	0.41089	0.632615	0.794152	11.7445	10.0913	2.03228	10.6892	16.6546	23.0061	1.85122	1.78232	1.19398	1.80816	2.02015	2.19008
571.5	0.309728	0.294844	0.162399	0.297597	0.36641	0.433362	2.16973	0.451	0.463	0.568	0.454	0.448	0.451	1.58092	1.46594	0.658173	1.50896	1.88276	2.21197	0.458005	0.382498	-0.418287	0.411421	0.632738	0.793884	11.766	10.1168	2.03935	10.7193	16.6878	23.034	1.85207	1.78345	1.19501	1.80943	2.02116	2.19075
571	0.30978	0.295011	0.162383	0.297748	0.366549	0.433521	2.17163	0.451	0.463	0.568	0.454	0.448	0.451	1.58118	1.46677	0.658109	1.50973	1.88347	2.21278	0.458173	0.383064	-0.418385	0.411929	0.633117	0.794251	11.7906	10.146	2.04252	10.749	16.7298	23.0913	1.85304	1.78474	1.19548	1.81068	2.02243	2.19211
570.5	0.309715	0.294966	0.162443	0.297797	0.366587	0.433634	2.17353	0.451	0.463	0.568	0.454	0.448	0.451	1.58085	1.46655	0.658352	1.50998	1.88367	2.21336	0.457963	0.382911	-0.418016	0.412093	0.633221	0.794512	11.8063	10.1607	2.04761	10.7714	16.7626	23.1439	1.85365	1.78538	1.19622	1.81162	2.02342	2.19336
570	0.309814	0.295081	0.162442	0.297919	0.366719	0.433836	2.17544	0.451	0.463	0.568	0.454	0.448	0.451	1.58136	1.46712	0.658348	1.51059	1.88435	2.21439	0.458283	0.383301	-0.418022	0.412503	0.633581	0.794978	11.8346	10.1865	2.05118	10.7991	16.8041	23.2061	1.85476	1.78651	1.19674	1.81279	2.02467	2.19483
569.5	0.309905	0.295216	0.16241	0.29804	0.366947	0.43381	2.17735	0.451	0.463	0.568	0.454	0.448	0.451	1.58182	1.46779	0.658218	1.51121	1.88552	2.21426	0.458577	0.383759	-0.418219	0.412909	0.634203	0.794918	11.8623	10.2137	2.05398	10.8269	16.8546	23.2441	1.85585	1.78771	1.19715	1.81395	2.02619	2.19573
569	0.309894	0.295248	0.162432	0.298175	0.366775	0.433953	2.17926	0.451	0.463	0.568	0.454	0.448	0.451	1.58176	1.46795	0.658307	1.51189	1.88463	2.21499	0.458541	0.383867	-0.418084	0.413362	0.633734	0.795247	11.8824	10.2339	2.05815	10.8558	16.8684	23.3003	1.85663	1.78859	1.19776	1.81516	2.0266	2.19705
568.5	0.309921	0.295241	0.162596	0.298291	0.366778	0.433886	2.18118	0.451	0.463	0.568	0.454	0.448	0.451	1.5819	1.46792	0.658972	1.51248	1.88465	2.21465	0.458628	0.383843	-0.417075	0.413751	0.633742	0.795093	11.9053	10.2514	2.06593	10.8833	16.8983	23.3341	1.85753	1.78935	1.19889	1.81631	2.0275	2.19785
568	0.309955	0.295317	0.162575	0.298479	0.366913	0.434001	2.1831	0.451	0.463	0.568	0.454	0.448	0.451	1.58208	1.46829	0.658887	1.51343	1.88534	2.21523	0.458738	0.384101	-0.417204	0.414381	0.63411	0.795358	11.9289	10.2748	2.06904	10.9162	16.9406	23.3876	1.85845	1.79037	1.19934	1.81768	2.02877	2.19911
567.5	0.310038	0.29533	0.16275	0.298559	0.367105	0.433912	2.18502	0.451	0.463	0.568	0.454	0.448	0.451	1.5825	1.46836	0.659596	1.51384	1.88633	2.21478	0.459006	0.384145	-0.416128	0.414649	0.634633	0.795153	11.9564	10.2938	2.07715	10.9413	16.9882	23.4192	1.85952	1.7912	1.20051	1.81873	2.03019	2.19985
567	0.310045	0.295546	0.162657	0.298854	0.366865	0.434188	2.18695	0.451	0.463	0.568	0.454	0.448	0.451	1.58254	1.46943	0.659219	1.51533	1.8851	2.21619	0.459028	0.384876	-0.416699	0.415636	0.633979	0.795789	11.978	10.327	2.07844	10.9823	16.9959	23.4904	1.86036	1.79264	1.2007	1.82043	2.03042	2.20152
566.5	0.310068	0.295611	0.16271	0.298607	0.367051	0.434218	2.18888	0.451	0.463	0.568	0.454	0.448	0.451	1.58265	1.46975	0.659434	1.51408	1.88605	2.21634	0.459103	0.385096	-0.416374	0.414809	0.634486	0.795858	12.0009	10.3498	2.08346	10.9835	17.0432	23.5351	1.86125	1.79363	1.20142	1.82048	2.03183	2.20257
566	0.310139	0.295711	0.162718	0.298956	0.367239	0.434483	2.19081	0.451	0.463	0.568	0.454	0.448	0.451	1.58302	1.47025	0.659466	1.51585	1.88702	2.21769	0.459332	0.385434	-0.416324	0.415978	0.634998	0.796468	12.0277	10.3751	2.08735	11.0287	17.0908	23.6055	1.86228	1.79473	1.20198	1.82235	2.03325	2.20421
565.5	0.310185	0.295584	0.162768	0.298796	0.36724	0.43444	2.19275	0.451	0.463	0.568	0.454	0.448	0.451	1.58325	1.46962	0.659669	1.51504	1.88702	2.21747	0.45948	0.385004	-0.416017	0.415442	0.635001	0.796369	12.0525	10.3846	2.09233	11.0364	17.1211	23.6426	1.86324	1.79514	1.2027	1.82266	2.03415	2.20508
565	0.310218	0.295734	0.162844	0.298915	0.367221	0.434386	2.19469	0.451	0.463	0.568	0.454	0.448	0.451	1.58342	1.47037	0.659977	1.51564	1.88693	2.2172	0.459586	0.385512	-0.41555	0.41584	0.634949	0.796245	12.0764	10.4135	2.09799	11.0647	17.1497	23.6786	1.86417	1.79638	1.20351	1.82383	2.035	2.20592
564.5	0.310314	0.295744	0.162861	0.299054	0.367453	0.43454	2.19663	0.451	0.463	0.568	0.454	0.448	0.451	1.58391	1.47042	0.660046	1.51635	1.88812	2.21798	0.459896	0.385545	-0.415446	0.416305	0.63558	0.796599	12.1053	10.4327	2.10215	11.0947	17.2018	23.7374	1.86528	1.79721	1.20411	1.82507	2.03654	2.20728
564	0.310378	0.295895	0.162885	0.299115	0.367396	0.434475	2.19858	0.451	0.463	0.568	0.454	0.448	0.451	1.58424	1.47117	0.660143	1.51666	1.88782	2.21765	0.460102	0.386056	-0.415299	0.416509	0.635425	0.796449	12.1318	10.4619	2.1065	11.1189	17.227	23.7724	1.8663	1.79847	1.20473	1.82606	2.03729	2.2081
563.5	0.310332	0.29606	0.162916	0.299223	0.367349	0.434667	2.20053	0.451	0.463	0.568	0.454	0.448	0.451	1.584	1.47199	0.660269	1.51721	1.88758	2.21863	0.459954	0.386613	-0.415108	0.41687	0.635297	0.796891	12.1497	10.4921	2.11104	11.1467	17.2531	23.8356	1.86699	1.79977	1.20538	1.8272	2.03806	2.20956
563	0.310404	0.296012	0.163029	0.299537	0.367472	0.434658	2.20249	0.451	0.463	0.568	0.454	0.448	0.451	1.58437	1.47175	0.660727	1.5188	1.88822	2.21859	0.460186	0.386451	-0.414415	0.417919	0.635632	0.79687	12.177	10.5074	2.11773	11.1899	17.2954	23.877	1.86803	1.80042	1.20633	1.82897	2.03931	2.21052
562.5	0.310429	0.296151	0.163021	0.299607	0.367603	0.434863	2.20444	0.451	0.463	0.568	0.454	0.448	0.451	1.5845	1.47244	0.660694	1.51915	1.88889	2.21963	0.460266	0.386921	-0.414464	0.418153	0.635989	0.797342	12.2006	10.5359	2.12129	11.215	17.3385	23.942	1.86894	1.80164	1.20684	1.83	2.04058	2.21203
562	0.310465	0.296209	0.162974	0.299628	0.367671	0.434939	2.20641	0.451	0.463	0.568	0.454	0.448	0.451	1.58468	1.47273	0.660504	1.51926	1.88924	2.22002	0.460382	0.387117	-0.414752	0.418223	0.636174	0.797517	12.2251	10.5588	2.12384	11.2366	17.3758	23.993	1.86988	1.80262	1.2072	1.83087	2.04167	2.2132
561.5	0.310494	0.296279	0.163142	0.299726	0.367747	0.434768	2.20837	0.451	0.463	0.568	0.454	0.448	0.451	1.58483	1.47308	0.661185	1.51976	1.88963	2.21915	0.460476	0.387353	-0.413722	0.41855	0.63638	0.797124	12.2492	10.5826	2.13201	11.264	17.4139	24.0169	1.8708	1.80363	1.20836	1.83199	2.04279	2.21375
561	0.310559	0.296299	0.163089	0.299702	0.367776	0.434992	2.21034	0.451	0.463	0.568	0.454	0.448	0.451	1.58516	1.47318	0.66097	1.51963	1.88978	2.22029	0.460685	0.38742	-0.414047	0.41847	0.636459	0.797639	12.2762	10.6029	2.13443	11.2823	17.4477	24.0845	1.87183	1.8045	1.2087	1.83273	2.04378	2.21531
560.5	0.310572	0.29634	0.163167	0.299793	0.367771	0.434977	2.21231	0.451	0.463	0.568	0.454	0.448	0.451	1.58523	1.47338	0.661286	1.5201	1.88975	2.22022	0.460727	0.387559	-0.413569	0.418773	0.636446	0.797604	12.2991	10.6248	2.14028	11.3093	17.4784	24.1258	1.8727	1.80543	1.20953	1.83383	2.04468	2.21626
560	0.310649	0.296464	0.163123	0.29992	0.367887	0.435171	2.21429	0.451	0.463	0.568	0.454	0.448	0.451	1.58562	1.474	0.661108	1.52074	1.89035	2.22121	0.460975	0.387977	-0.413839	0.419197	0.636761	0.79805	12.3272	10.6527	2.14295	11.3391	17.5207	24.1905	1.87377	1.80661	1.20991	1.83503	2.04592	2.21774
559.5	0.310682	0.296515	0.163182	0.300121	0.367994	0.435197	2.21626	0.451	0.463	0.568	0.454	0.448	0.451	1.58579	1.47425	0.661347	1.52176	1.8909	2.22134	0.461081	0.388149	-0.413477	0.419867	0.637052	0.79811	12.3519	10.6754	2.14833	11.3746	17.5622	24.2366	1.87471	1.80757	1.21067	1.83647	2.04713	2.2188
559	0.310674	0.29666	0.163207	0.300176	0.368048	0.435352	2.21825	0.451	0.463	0.568	0.454	0.448	0.451	1.58575	1.47497	0.661448	1.52204	1.89118	2.22213	0.461055	0.388638	-0.413324	0.42005	0.637198	0.798466	12.3733	10.705	2.15284	11.3991	17.5988	24.2973	1.87552	1.80883	1.2113	1.83746	2.04819	2.22019
558.5	0.31074	0.296751	0.163314	0.300072	0.368219	0.435334	2.22023	0.451	0.463	0.568	0.454	0.448	0.451	1.58608	1.47542	0.661882	1.52151	1.89205	2.22204	0.461268	0.388945	-0.412668	0.419704	0.637663	0.798425	12.4008	10.7307	2.15952	11.4116	17.6467	24.3388	1.87656	1.80991	1.21224	1.83796	2.04959	2.22113
558	0.310779	0.296863	0.16332	0.300464	0.368063	0.435244	2.22222	0.451	0.463	0.568	0.454	0.448	0.451	1.58628	1.47598	0.661906	1.5235	1.89125	2.22158	0.461393	0.389322	-0.412632	0.421009	0.637239	0.798218	12.4261	10.7581	2.16355	11.462	17.6634	24.3724	1.87752	1.81106	1.21281	1.83999	2.05007	2.2219
557.5	0.310827	0.296823	0.163458	0.300619	0.368336	0.43555	2.22422	0.451	0.463	0.568	0.454	0.448	0.451	1.58653	1.47578	0.662465	1.52428	1.89266	2.22314	0.461547	0.389187	-0.411787	0.421525	0.637981	0.798921	12.4523	10.7745	2.1711	11.4944	17.7213	24.4505	1.8785	1.81175	1.21386	1.84129	2.05175	2.22368
557	0.310826	0.296975	0.163367	0.30072	0.368302	0.435606	2.22621	0.451	0.463	0.568	0.454	0.448	0.451	1.58652	1.47654	0.662097	1.5248	1.89248	2.22343	0.461544	0.389699	-0.412344	0.421861	0.637888	0.799049	12.4746	10.8049	2.17258	11.5228	17.7499	24.5007	1.87934	1.81303	1.21407	1.84242	2.05257	2.22482
556.5	0.310903	0.297033	0.163447	0.300776	0.368547	0.435567	2.22821	0.451	0.463	0.568	0.454	0.448	0.451	1.58692	1.47682	0.662421	1.52508	1.89374	2.22323	0.461792	0.389894	-0.411854	0.422047	0.638553	0.79896	12.5032	10.8286	2.17862	11.5478	17.8055	24.5403	1.88042	1.81402	1.21491	1.84342	2.05418	2.22572
556	0.310975	0.296914	0.163544	0.300849	0.368451	0.435754	2.23022	0.451	0.463	0.568	0.454	0.448	0.451	1.58728	1.47623	0.662814	1.52545	1.89325	2.22418	0.462023	0.389494	-0.411261	0.42229	0.638293	0.799389	12.5315	10.8394	2.18513	11.5742	17.8282	24.6056	1.88148	1.81447	1.21582	1.84447	2.05484	2.2272
555.5	0.310897	0.29702	0.163532	0.300929	0.36843	0.435967	2.23222	0.451	0.463	0.568	0.454	0.448	0.451	1.58688	1.47676	0.662765	1.52586	1.89314	2.22527	0.461773	0.389851	-0.411334	0.422555	0.638236	0.799878	12.5478	10.8666	2.18874	11.6012	17.8583	24.674	1.88209	1.81562	1.21632	1.84555	2.0557	2.22874
555	0.310986	0.297268	0.163594	0.30108	0.368592	0.435853	2.23423	0.451	0.463	0.568	0.454	0.448	0.451	1.58734	1.47799	0.663017	1.52662	1.89397	2.22469	0.462059	0.390685	-0.410955	0.423057	0.638675	0.799616	12.5776	10.9044	2.19435	11.6338	17.9062	24.7056	1.88321	1.81719	1.2171	1.84684	2.05708	2.22946
554.5	0.311043	0.297315	0.163449	0.301226	0.368671	0.435953	2.23625	0.451	0.463	0.568	0.454	0.448	0.451	1.58763	1.47823	0.662429	1.52736	1.89438	2.2252	0.462242	0.390843	-0.411842	0.423542	0.63889	0.799845	12.6049	10.9275	2.19442	11.6661	17.9462	24.7615	1.88423	1.81815	1.21711	1.84812	2.05823	2.23072
554	0.311104	0.297331	0.163686	0.301206	0.368747	0.435869	2.23827	0.451	0.463	0.568	0.454	0.448	0.451	1.58794	1.47831	0.663389	1.52726	1.89477	2.22477	0.462438	0.390897	-0.410393	0.423476	0.639096	0.799653	12.6326	10.9485	2.20476	11.6856	17.986	24.7967	1.88527	1.81902	1.21854	1.8489	2.05937	2.23151
553.5	0.311137	0.297356	0.163664	0.30122	0.368905	0.435977	2.24029	0.451	0.463	0.568	0.454	0.448	0.451	1.58811	1.47843	0.6633	1.52733	1.89558	2.22532	0.462544	0.390981	-0.410528	0.423522	0.639524	0.7999	12.6581	10.9701	2.20815	11.7078	18.034	24.8538	1.88622	1.81992	1.21901	1.84977	2.06074	2.23279
553	0.311262	0.297439	0.163716	0.301587	0.36898	0.43614	2.24231	0.451	0.463	0.568	0.454	0.448	0.451	1.58875	1.47884	0.663511	1.52919	1.89596	2.22615	0.462946	0.39126	-0.41021	0.42474	0.639728	0.800274	12.6912	10.9961	2.21355	11.7576	18.074	24.9174	1.88745	1.821	1.21975	1.85174	2.06188	2.23422
552.5	0.311317	0.297709	0.163826	0.301563	0.368987	0.436157	2.24434	0.451	0.463	0.568	0.454	0.448	0.451	1.58903	1.48019	0.663957	1.52907	1.896	2.22624	0.463123	0.392168	-0.409538	0.42466	0.639746	0.800313	12.7187	11.036	2.22054	11.777	18.1074	24.9645	1.88847	1.82265	1.22072	1.8525	2.06283	2.23527
552	0.311303	0.297809	0.16373	0.301878	0.368989	0.436214	2.24638	0.451	0.463	0.568	0.454	0.448	0.451	1.58896	1.48068	0.663568	1.53067	1.89601	2.22653	0.463078	0.392504	-0.410124	0.425704	0.639752	0.800444	12.7406	11.0634	2.22196	11.823	18.1404	25.0162	1.88928	1.82378	1.22091	1.85431	2.06377	2.23643
551.5	0.311367	0.297802	0.163853	0.30174	0.369104	0.436267	2.24841	0.451	0.463	0.568	0.454	0.448	0.451	1.58928	1.48065	0.664066	1.52997	1.8966	2.2268	0.463283	0.39248	-0.409373	0.425247	0.640064	0.800565	12.7689	11.083	2.22933	11.8336	18.1846	25.0677	1.89033	1.82458	1.22192	1.85472	2.06503	2.23758
551	0.3113	0.297778	0.163723	0.302119	0.369288	0.436395	2.25045	0.451	0.463	0.568	0.454	0.448	0.451	1.58894	1.48053	0.663539	1.53189	1.89755	2.22745	0.463068	0.392399	-0.410167	0.426502	0.640562	0.800859	12.7866	11.1013	2.22984	11.8849	18.2358	25.128	1.89099	1.82534	1.22199	1.85673	2.06648	2.23892
550.5	0.311421	0.297938	0.163905	0.301936	0.369194	0.436341	2.2525	0.451	0.463	0.568	0.454	0.448	0.451	1.58956	1.48132	0.664277	1.53096	1.89706	2.22718	0.463457	0.392937	-0.409056	0.425896	0.640307	0.800735	12.8198	11.1334	2.23886	11.8921	18.2597	25.1674	1.89222	1.82666	1.22323	1.85701	2.06716	2.2398
550	0.311491	0.298075	0.163976	0.30227	0.36929	0.436544	2.25455	0.451	0.463	0.568	0.454	0.448	0.451	1.58992	1.48201	0.664565	1.53266	1.89756	2.22821	0.463681	0.393396	-0.408623	0.427002	0.640567	0.8012	12.8489	11.1639	2.24488	11.9401	18.3024	25.2366	1.89329	1.82791	1.22405	1.85888	2.06836	2.24134
549.5	0.311544	0.298115	0.163863	0.302373	0.369383	0.436286	2.2566	0.451	0.463	0.568	0.454	0.448	0.451	1.59019	1.4822	0.664107	1.53318	1.89803	2.2269	0.463852	0.393531	-0.409312	0.427342	0.640819	0.800609	12.8767	11.1873	2.24587	11.97	18.3449	25.2527	1.89431	1.82886	1.22418	1.86004	2.06957	2.2417
549	0.311542	0.298041	0.164011	0.302328	0.369589	0.436385	2.25865	0.451	0.463	0.568	0.454	0.448	0.451	1.59018	1.48184	0.664707	1.53295	1.89909	2.2274	0.463845	0.393282	-0.40841	0.427194	0.641377	0.800836	12.9	11.2021	2.25402	11.9882	18.3989	25.3102	1.89517	1.82947	1.22529	1.86075	2.07108	2.24297
548.5	0.311564	0.298173	0.164171	0.302468	0.369456	0.436572	2.26071	0.451	0.463	0.568	0.454	0.448	0.451	1.59029	1.48249	0.665355	1.53366	1.89841	2.22836	0.463916	0.393725	-0.407435	0.427657	0.641017	0.801264	12.9253	11.2325	2.26254	12.0212	18.4192	25.3781	1.8961	1.83071	1.22645	1.86203	2.07166	2.24448
548	0.311641	0.29829	0.164081	0.302634	0.369727	0.436875	2.26277	0.451	0.463	0.568	0.454	0.448	0.451	1.59068	1.48307	0.66499	1.5345	1.8998	2.2299	0.464163	0.394117	-0.407983	0.428205	0.64175	0.801958	12.9553	11.2618	2.26419	12.0564	18.4799	25.4598	1.8972	1.8319	1.22667	1.86339	2.07336	2.24628
547.5	0.311653	0.29835	0.164242	0.302903	0.369633	0.436941	2.26484	0.451	0.463	0.568	0.454	0.448	0.451	1.59074	1.48337	0.665643	1.53586	1.89932	2.23024	0.464201	0.394319	-0.407002	0.429094	0.641496	0.802109	12.98	11.2869	2.27278	12.0999	18.5042	25.514	1.8981	1.83292	1.22783	1.86507	2.07404	2.24747
547	0.311699	0.298521	0.1642	0.302949	0.369889	0.437036	2.26691	0.451	0.463	0.568	0.454	0.448	0.451	1.59098	1.48422	0.665473	1.5361	1.90063	2.23072	0.464349	0.394892	-0.407258	0.429246	0.642188	0.802327	13.0076	11.3205	2.27577	12.1257	18.5638	25.5718	1.89911	1.83428	1.22824	1.86606	2.07571	2.24874
546.5	0.31176	0.298528	0.164275	0.302977	0.369738	0.436929	2.26898	0.451	0.463	0.568	0.454	0.448	0.451	1.59129	1.48426	0.665776	1.53624	1.89986	2.23018	0.464545	0.394915	-0.406801	0.429338	0.64178	0.802082	13.0365	11.3418	2.28202	12.1501	18.5826	25.606	1.90016	1.83515	1.22908	1.867	2.07623	2.2495
546	0.311812	0.298611	0.164309	0.303239	0.370016	0.437123	2.27106	0.451	0.463	0.568	0.454	0.448	0.451	1.59155	1.48467	0.665914	1.53757	1.90129	2.23117	0.464711	0.395193	-0.406594	0.430202	0.642531	0.802526	13.0648	11.3689	2.28715	12.1935	18.6446	25.6757	1.90119	1.83624	1.22977	1.86867	2.07797	2.25103
545.5	0.311825	0.298599	0.164397	0.303302	0.370018	0.43722	2.27314	0.451	0.463	0.568	0.454	0.448	0.451	1.59162	1.48461	0.666271	1.53789	1.9013	2.23166	0.464753	0.395153	-0.406059	0.43041	0.642537	0.802747	13.0898	11.3888	2.2938	12.2209	18.679	25.7342	1.9021	1.83705	1.23066	1.86972	2.07892	2.25231
545	0.311905	0.298918	0.164335	0.303565	0.37	0.437266	2.27523	0.451	0.463	0.568	0.454	0.448	0.451	1.59203	1.4862	0.66602	1.53922	1.90121	2.2319	0.46501	0.396221	-0.406436	0.431277	0.642488	0.802853	13.1206	11.4341	2.29628	12.2646	18.7115	25.7869	1.90322	1.83887	1.23099	1.87139	2.07983	2.25346
544.5	0.311958	0.298892	0.164479	0.303531	0.370225	0.437376	2.27732	0.451	0.463	0.568	0.454	0.448	0.451	1.5923	1.48607	0.666603	1.53905	1.90236	2.23246	0.46518	0.396134	-0.40556	0.431165	0.643096	0.803104	13.1491	11.4531	2.30453	12.2844	18.7687	25.8473	1.90425	1.83963	1.2321	1.87214	2.08141	2.25478
544	0.311989	0.298999	0.16454	0.303792	0.370251	0.437325	2.27941	0.451	0.463	0.568	0.454	0.448	0.451	1.59246	1.4866	0.66685	1.54037	1.9025	2.2322	0.465279	0.396491	-0.405189	0.432024	0.643166	0.802988	13.1759	11.4824	2.31048	12.3281	18.8058	25.8888	1.90522	1.84081	1.23289	1.8738	2.08244	2.25568
543.5	0.312074	0.29913	0.164511	0.303908	0.370341	0.437386	2.28151	0.451	0.463	0.568	0.454	0.448	0.451	1.59289	1.48725	0.666733	1.54096	1.90296	2.23251	0.465551	0.39693	-0.405366	0.432406	0.643409	0.803127	13.2074	11.5136	2.31392	12.3603	18.8496	25.9437	1.90636	1.84206	1.23335	1.87502	2.08365	2.25688
543	0.312115	0.29927	0.164471	0.303864	0.370373	0.437591	2.28361	0.451	0.463	0.568	0.454	0.448	0.451	1.5931	1.48795	0.666571	1.54074	1.90312	2.23356	0.465683	0.397397	-0.405609	0.432261	0.643496	0.803596	13.2352	11.5457	2.31706	12.3794	18.8876	26.0159	1.90736	1.84334	1.23377	1.87575	2.0847	2.25844
542.5	0.312176	0.299461	0.164493	0.304022	0.370453	0.43755	2.28571	0.451	0.463	0.568	0.454	0.448	0.451	1.59341	1.4889	0.66666	1.54154	1.90353	2.23335	0.465878	0.398035	-0.405475	0.432781	0.643712	0.803502	13.2648	11.5817	2.32195	12.4152	18.9306	26.0589	1.90843	1.84477	1.23442	1.8771	2.08589	2.25938
542	0.312236	0.299484	0.164642	0.304162	0.370616	0.437501	2.28782	0.451	0.463	0.568	0.454	0.448	0.451	1.59372	1.48901	0.667264	1.54225	1.90437	2.2331	0.46607	0.398112	-0.40457	0.433242	0.644152	0.80339	13.2944	11.6049	2.33045	12.4495	18.9823	26.1012	1.90949	1.8457	1.23555	1.8784	2.08731	2.26029
541.5	0.312254	0.299511	0.164667	0.304399	0.370736	0.437547	2.28994	0.451	0.463	0.568	0.454	0.448	0.451	1.59381	1.48915	0.667365	1.54345	1.90499	2.23333	0.466128	0.398202	-0.404418	0.43402	0.644475	0.803495	13.3205	11.6284	2.33547	12.492	19.0296	26.1549	1.91043	1.84663	1.23621	1.88	2.08861	2.26146
541	0.312273	0.299613	0.164822	0.304341	0.370703	0.437742	2.29205	0.451	0.463	0.568	0.454	0.448	0.451	1.59391	1.48965	0.667993	1.54316	1.90482	2.23433	0.466189	0.398543	-0.403477	0.43383	0.644386	0.803941	13.3467	11.6579	2.34419	12.5103	19.0614	26.2267	1.91137	1.8478	1.23737	1.88069	2.08948	2.26301
540.5	0.312339	0.299657	0.164803	0.304458	0.370764	0.437741	2.29417	0.451	0.463	0.568	0.454	0.448	0.451	1.59424	1.48987	0.667916	1.54375	1.90513	2.23432	0.4664	0.39869	-0.403592	0.434214	0.644551	0.803938	13.3771	11.6829	2.34799	12.5431	19.103	26.2751	1.91245	1.84879	1.23787	1.88192	2.09062	2.26405
540	0.312402	0.299712	0.164834	0.304812	0.370926	0.437843	2.2963	0.451	0.463	0.568	0.454	0.448	0.451	1.59457	1.49014	0.668042	1.54554	1.90596	2.23484	0.466602	0.398873	-0.403404	0.435376	0.644988	0.804171	13.4073	11.7088	2.35322	12.5956	19.1551	26.336	1.91353	1.84981	1.23856	1.88389	2.09205	2.26536
539.5	0.312444	0.299678	0.16492	0.304895	0.370837	0.438011	2.29842	0.451	0.463	0.568	0.454	0.448	0.451	1.59478	1.48998	0.668391	1.54597	1.90551	2.2357	0.466736	0.39876	-0.402883	0.435649	0.644748	0.804555	13.4358	11.7279	2.36005	12.6258	19.1814	26.4051	1.91455	1.85057	1.23945	1.88502	2.09276	2.26685
539	0.312447	0.299941	0.164929	0.304885	0.371054	0.437927	2.30056	0.451	0.463	0.568	0.454	0.448	0.451	1.5948	1.49128	0.668427	1.54591	1.90662	2.23527	0.466746	0.399637	-0.402828	0.435616	0.645333	0.804363	13.461	11.7703	2.36469	12.6484	19.2395	26.444	1.91544	1.85224	1.24006	1.88586	2.09435	2.26768
538.5	0.312451	0.300011	0.16502	0.305107	0.371135	0.438012	2.30269	0.451	0.463	0.568	0.454	0.448	0.451	1.59482	1.49163	0.668796	1.54704	1.90704	2.23571	0.466759	0.39987	-0.402276	0.436344	0.645551	0.804557	13.4863	11.7976	2.3717	12.6904	19.2837	26.5034	1.91634	1.85331	1.24098	1.88742	2.09555	2.26895
538	0.312561	0.30015	0.165023	0.30529	0.371334	0.438123	2.30483	0.451	0.463	0.568	0.454	0.448	0.451	1.59538	1.49232	0.668808	1.54797	1.90806	2.23627	0.467111	0.400334	-0.402258	0.436943	0.646087	0.804811	13.5209	11.8305	2.37619	12.7293	19.3403	26.5661	1.91757	1.8546	1.24157	1.88886	2.09708	2.27029
537.5	0.312651	0.300123	0.16498	0.305407	0.371299	0.438284	2.30698	0.451	0.463	0.568	0.454	0.448	0.451	1.59584	1.49219	0.668634	1.54856	1.90788	2.23709	0.467399	0.400244	-0.402519	0.437326	0.645993	0.805178	13.5539	11.8504	2.37938	12.7627	19.3726	26.6352	1.91874	1.85538	1.24198	1.8901	2.09796	2.27177
537	0.312696	0.300183	0.165092	0.305498	0.371385	0.438375	2.30912	0.451	0.463	0.568	0.454	0.448	0.451	1.59607	1.49249	0.669088	1.54902	1.90832	2.23756	0.467542	0.400444	-0.40184	0.437624	0.646224	0.805386	13.583	11.8772	2.38705	12.7941	19.4177	26.6959	1.91977	1.85643	1.24298	1.89127	2.09918	2.27306
536.5	0.312737	0.300073	0.16514	0.305536	0.371358	0.438417	2.31128	0.451	0.463	0.568	0.454	0.448	0.451	1.59628	1.49194	0.669282	1.54922	1.90818	2.23777	0.467674	0.400077	-0.40155	0.437749	0.646152	0.805481	13.6119	11.8907	2.39289	12.8212	19.4511	26.7508	1.92079	1.85696	1.24374	1.89226	2.10008	2.27423
536	0.312795	0.300363	0.165153	0.305669	0.371476	0.438413	2.31343	0.451	0.463	0.568	0.454	0.448	0.451	1.59657	1.49338	0.669335	1.54989	1.90879	2.23775	0.467859	0.401043	-0.401471	0.438184	0.646469	0.805472	13.6424	11.9359	2.39773	12.8563	19.4998	26.8002	1.92186	1.85872	1.24437	1.89356	2.10139	2.27528
535.5	0.312837	0.300434	0.165255	0.305765	0.371498	0.438569	2.31559	0.451	0.463	0.568	0.454	0.448	0.451	1.59679	1.49373	0.669748	1.55038	1.9089	2.23855	0.467993	0.401279	-0.400853	0.438498	0.646529	0.805828	13.6716	11.9639	2.40518	12.8884	19.5385	26.8694	1.92289	1.85981	1.24534	1.89474	2.10244	2.27675
535	0.312818	0.300622	0.165249	0.305928	0.371534	0.438714	2.31776	0.451	0.463	0.568	0.454	0.448	0.451	1.59669	1.49467	0.669724	1.5512	1.90909	2.23929	0.467933	0.401905	-0.40089	0.439031	0.646625	0.806159	13.6955	12.0012	2.4095	12.9263	19.5789	26.9374	1.92373	1.86126	1.2459	1.89613	2.10352	2.27819
534.5	0.312908	0.300596	0.165289	0.306095	0.371587	0.438702	2.31993	0.451	0.463	0.568	0.454	0.448	0.451	1.59715	1.49454	0.669886	1.55205	1.90936	2.23923	0.46822	0.401818	-0.400648	0.439577	0.646768	0.806131	13.729	12.0216	2.41518	12.9646	19.6211	26.9864	1.92491	1.86205	1.24663	1.89754	2.10465	2.27922
534	0.312955	0.300716	0.165502	0.306214	0.371755	0.438927	2.3221	0.451	0.463	0.568	0.454	0.448	0.451	1.59739	1.49514	0.670749	1.55265	1.91022	2.24038	0.46837	0.402218	-0.39936	0.439965	0.64722	0.806644	13.7589	12.0538	2.42595	12.999	19.6757	27.0647	1.92595	1.86329	1.24802	1.89879	2.10612	2.28087
533.5	0.312976	0.300709	0.165296	0.306348	0.371882	0.439057	2.32427	0.451	0.463	0.568	0.454	0.448	0.451	1.5975	1.4951	0.669914	1.55333	1.91088	2.24104	0.468437	0.402194	-0.400605	0.440403	0.647562	0.80694	13.7865	12.0758	2.42445	13.0348	19.726	27.1315	1.92692	1.86414	1.24782	1.9001	2.10746	2.28228
533	0.313082	0.300889	0.165533	0.30651	0.372094	0.43909	2.32645	0.451	0.463	0.568	0.454	0.448	0.451	1.59804	1.496	0.670875	1.55415	1.91197	2.24121	0.468776	0.402793	-0.399173	0.440931	0.648132	0.807015	13.8217	12.113	2.43597	13.0731	19.7856	27.1865	1.92815	1.86557	1.2493	1.90149	2.10905	2.28343
532.5	0.313178	0.300936	0.165515	0.306609	0.372178	0.439218	2.32864	0.451	0.463	0.568	0.454	0.448	0.451	1.59853	1.49623	0.670802	1.55466	1.9124	2.24186	0.469083	0.402949	-0.399281	0.441254	0.648357	0.807307	13.8562	12.1395	2.44002	13.1061	19.8317	27.2535	1.92935	1.8666	1.24982	1.90269	2.11028	2.28484
532	0.313182	0.300975	0.165536	0.306727	0.372242	0.439203	2.33083	0.451	0.463	0.568	0.454	0.448	0.451	1.59855	1.49642	0.670887	1.55525	1.91273	2.24179	0.469095	0.403078	-0.399154	0.441639	0.648529	0.807273	13.8826	12.1655	2.44523	13.1408	19.8758	27.3029	1.93027	1.86759	1.25049	1.90395	2.11145	2.28587
531.5	0.313147	0.301086	0.165524	0.306788	0.372232	0.439165	2.33302	0.451	0.463	0.568	0.454	0.448	0.451	1.59837	1.49698	0.670838	1.55556	1.91267	2.24159	0.468984	0.403447	-0.399227	0.441838	0.648502	0.807186	13.9056	12.1974	2.44947	13.1708	19.9122	27.3495	1.93107	1.86882	1.25103	1.90504	2.11242	2.28685
531	0.313226	0.301168	0.165617	0.306921	0.372317	0.439364	2.33522	0.451	0.463	0.568	0.454	0.448	0.451	1.59877	1.49738	0.671215	1.55624	1.91311	2.24261	0.469236	0.40372	-0.398665	0.442271	0.648731	0.807639	13.9389	12.227	2.45685	13.2071	19.9588	27.4259	1.93222	1.86995	1.25197	1.90635	2.11365	2.28844
530.5	0.313258	0.301248	0.165634	0.307208	0.372214	0.439669	2.33742	0.451	0.463	0.568	0.454	0.448	0.451	1.59894	1.49778	0.671284	1.55769	1.91258	2.24416	0.469338	0.403985	-0.398563	0.443206	0.648454	0.808333	13.968	12.2566	2.46199	13.2567	19.9854	27.5158	1.93323	1.87108	1.25263	1.90814	2.11436	2.29032
530	0.313333	0.301335	0.165687	0.307269	0.372416	0.439648	2.33962	0.451	0.463	0.568	0.454	0.448	0.451	1.59932	1.49821	0.671499	1.558	1.91362	2.24406	0.469577	0.404274	-0.398243	0.443405	0.648997	0.808285	14.0011	12.2868	2.46821	13.287	20.0449	27.5651	1.93437	1.87223	1.25342	1.90922	2.11593	2.29134
529.5	0.313448	0.30148	0.165702	0.307311	0.372547	0.439824	2.34183	0.451	0.463	0.568	0.454	0.448	0.451	1.59991	1.49894	0.67156	1.55822	1.91429	2.24496	0.469944	0.404755	-0.398152	0.443541	0.649348	0.808686	14.0378	12.3219	2.47332	13.3158	20.0969	27.6393	1.93564	1.87357	1.25407	1.91026	2.1173	2.29288
529	0.313473	0.301555	0.165776	0.307604	0.372562	0.439705	2.34405	0.451	0.463	0.568	0.454	0.448	0.451	1.60003	1.49931	0.67186	1.5597	1.91437	2.24435	0.470024	0.405004	-0.397706	0.444494	0.649389	0.808415	14.0666	12.3513	2.48021	13.3664	20.1365	27.6766	1.93663	1.87469	1.25494	1.91207	2.11834	2.29366
528.5	0.313483	0.30157	0.165852	0.307577	0.372887	0.439881	2.34626	0.451	0.463	0.568	0.454	0.448	0.451	1.60008	1.49938	0.672168	1.55956	1.91604	2.24525	0.470056	0.405053	-0.397247	0.444407	0.650261	0.808815	14.0942	12.3759	2.48719	13.3894	20.2098	27.7512	1.93758	1.87562	1.25582	1.91289	2.12027	2.2952
528	0.313511	0.301729	0.165998	0.307654	0.372786	0.440094	2.34848	0.451	0.463	0.568	0.454	0.448	0.451	1.60023	1.50017	0.67276	1.55995	1.91552	2.24633	0.470145	0.405581	-0.396367	0.444657	0.64999	0.809299	14.1234	12.4125	2.49629	13.4215	20.2371	27.8307	1.93858	1.877	1.25697	1.91404	2.12098	2.29684
527.5	0.313632	0.30181	0.165833	0.307797	0.372973	0.439974	2.35071	0.451	0.463	0.568	0.454	0.448	0.451	1.60084	1.50058	0.672091	1.56068	1.91648	2.24572	0.470531	0.405849	-0.397362	0.445122	0.650491	0.809027	14.1611	12.4427	2.49606	13.4594	20.2959	27.8683	1.93988	1.87814	1.25694	1.91539	2.12252	2.29762
527	0.313655	0.301835	0.165996	0.307955	0.373098	0.440244	2.35294	0.451	0.463	0.568	0.454	0.448	0.451	1.60096	1.5007	0.672751	1.56148	1.91712	2.2471	0.470605	0.405932	-0.396379	0.445635	0.650826	0.80964	14.1901	12.4684	2.50571	13.4988	20.348	27.9555	1.94087	1.87911	1.25815	1.91679	2.12388	2.29941
526.5	0.313745	0.302051	0.166016	0.307923	0.373204	0.440182	2.35518	0.451	0.463	0.568	0.454	0.448	0.451	1.60142	1.50177	0.672832	1.56132	1.91767	2.24678	0.470892	0.406647	-0.396259	0.445531	0.65111	0.809499	14.2252	12.51	2.51108	13.5217	20.3983	28.0007	1.94207	1.88068	1.25882	1.9176	2.12519	2.30034
526	0.313765	0.302265	0.166047	0.307921	0.373152	0.440256	2.35741	0.451	0.463	0.568	0.454	0.448	0.451	1.60152	1.50284	0.672958	1.56131	1.9174	2.24716	0.470955	0.407355	-0.396072	0.445524	0.650971	0.809667	14.2541	12.5515	2.5168	13.5472	20.4314	28.0634	1.94305	1.88224	1.25954	1.9185	2.12606	2.30163
525.5	0.313788	0.302158	0.166051	0.308212	0.373353	0.440289	2.35966	0.451	0.463	0.568	0.454	0.448	0.451	1.60164	1.50231	0.672974	1.56278	1.91843	2.24733	0.471029	0.407001	-0.396048	0.446469	0.651509	0.809742	14.2833	12.5665	2.52171	13.5987	20.4924	28.121	1.94405	1.8828	1.26015	1.92032	2.12764	2.30281
525	0.313864	0.302395	0.166272	0.308543	0.373471	0.440533	2.3619	0.451	0.463	0.568	0.454	0.448	0.451	1.60203	1.50348	0.67387	1.56446	1.91904	2.24857	0.471271	0.407785	-0.394718	0.447542	0.651825	0.810296	14.3174	12.6102	2.53324	13.6538	20.5444	28.2059	1.94521	1.88443	1.26159	1.92227	2.12899	2.30454
524.5	0.313918	0.302298	0.166362	0.308532	0.373438	0.440482	2.36416	0.451	0.463	0.568	0.454	0.448	0.451	1.6023	1.503	0.674235	1.56441	1.91887	2.24831	0.471443	0.407465	-0.394177	0.447507	0.651737	0.810181	14.3497	12.6262	2.54082	13.6789	20.5799	28.2531	1.9463	1.88503	1.26254	1.92315	2.12991	2.30551
524	0.314008	0.302302	0.166376	0.308737	0.373665	0.4406	2.36641	0.451	0.463	0.568	0.454	0.448	0.451	1.60276	1.50302	0.674291	1.56545	1.92004	2.24892	0.471729	0.407478	-0.394093	0.448171	0.652345	0.810448	14.3853	12.6506	2.5461	13.7233	20.6443	28.3222	1.94751	1.88594	1.26319	1.92471	2.13157	2.30692
523.5	0.313977	0.302505	0.166374	0.308712	0.373736	0.440824	2.36867	0.451	0.463	0.568	0.454	0.448	0.451	1.60261	1.50403	0.674283	1.56532	1.9204	2.25006	0.471631	0.408149	-0.394105	0.44809	0.652535	0.810957	14.41	12.6918	2.55091	13.7473	20.6916	28.4052	1.94834	1.88747	1.26379	1.92555	2.13279	2.3086
523	0.314138	0.302788	0.166497	0.308878	0.373844	0.440786	2.37094	0.451	0.463	0.568	0.454	0.448	0.451	1.60343	1.50544	0.674782	1.56616	1.92096	2.24987	0.472143	0.409084	-0.393366	0.448627	0.652824	0.81087	14.4524	12.7399	2.55957	13.7884	20.7432	28.4546	1.94978	1.88926	1.26486	1.92698	2.13412	2.30961
522.5	0.314114	0.30287	0.166527	0.308987	0.373891	0.440757	2.37321	0.451	0.463	0.568	0.454	0.448	0.451	1.6033	1.50585	0.674903	1.56671	1.9212	2.24972	0.472067	0.409355	-0.393186	0.44898	0.652949	0.810805	14.4778	12.7712	2.56539	13.8245	20.7881	28.5054	1.95063	1.89042	1.26558	1.92825	2.13528	2.31064
522	0.314213	0.302827	0.166614	0.309226	0.374097	0.44106	2.37548	0.451	0.463	0.568	0.454	0.448	0.451	1.60381	1.50563	0.675256	1.56793	1.92226	2.25126	0.472382	0.409213	-0.392663	0.449754	0.6535	0.811492	14.5147	12.7921	2.573	13.8725	20.8509	28.5993	1.95188	1.89119	1.26651	1.92992	2.13689	2.31254
521.5	0.314255	0.302914	0.166723	0.309319	0.374171	0.440793	2.37776	0.451	0.463	0.568	0.454	0.448	0.451	1.60402	1.50606	0.675698	1.5684	1.92264	2.2499	0.472516	0.4095	-0.392009	0.450054	0.653698	0.810886	14.5464	12.824	2.58131	13.9074	20.8992	28.6195	1.95294	1.89237	1.26753	1.93113	2.13812	2.31295
521	0.314258	0.3031	0.166551	0.309493	0.374228	0.440984	2.38004	0.451	0.463	0.568	0.454	0.448	0.451	1.60404	1.50699	0.675001	1.56928	1.92293	2.25088	0.472525	0.410114	-0.393042	0.450617	0.65385	0.81132	14.5747	12.8644	2.58093	13.9498	20.9457	28.6993	1.95389	1.89386	1.26749	1.9326	2.13931	2.31456
520.5	0.314292	0.303192	0.166715	0.309579	0.374323	0.441164	2.38232	0.451	0.463	0.568	0.454	0.448	0.451	1.60421	1.50745	0.675665	1.56972	1.92342	2.25179	0.472633	0.410418	-0.392057	0.450894	0.654104	0.811728	14.6058	12.8969	2.59099	13.9844	20.9966	28.7779	1.95493	1.89505	1.26872	1.9338	2.14061	2.31614
520	0.314311	0.303338	0.166792	0.309783	0.374381	0.441342	2.38462	0.451	0.463	0.568	0.454	0.448	0.451	1.60431	1.50817	0.675977	1.57075	1.92372	2.2527	0.472694	0.410899	-0.391596	0.451553	0.654259	0.812131	14.6357	12.9342	2.59837	14.0298	21.0435	28.8566	1.95593	1.89642	1.26962	1.93536	2.1418	2.31772
519.5	0.314426	0.303386	0.166891	0.309897	0.374579	0.441428	2.38691	0.451	0.463	0.568	0.454	0.448	0.451	1.6049	1.50841	0.676379	1.57133	1.92473	2.25314	0.47306	0.411057	-0.391002	0.451921	0.654788	0.812326	14.6746	12.9632	2.60647	14.0671	21.1064	28.9234	1.95723	1.89748	1.27061	1.93665	2.1434	2.31906
519	0.314466	0.303444	0.166862	0.310035	0.374721	0.441549	2.38921	0.451	0.463	0.568	0.454	0.448	0.451	1.6051	1.5087	0.676261	1.57203	1.92546	2.25376	0.473187	0.411248	-0.391176	0.452366	0.655167	0.8126	14.7066	12.9931	2.61058	14.1068	21.1631	28.9951	1.9583	1.89858	1.27111	1.93802	2.14484	2.3205
518.5	0.314535	0.303514	0.166944	0.310102	0.374831	0.44159	2.39151	0.451	0.463	0.568	0.454	0.448	0.451	1.60545	1.50905	0.676593	1.57237	1.92603	2.25397	0.473406	0.411479	-0.390685	0.452582	0.65546	0.812693	14.7415	13.0242	2.61819	14.1401	21.2164	29.0564	1.95946	1.89971	1.27204	1.93916	2.14619	2.32172
518	0.314651	0.303626	0.16701	0.310172	0.374815	0.441767	2.39382	0.451	0.463	0.568	0.454	0.448	0.451	1.60605	1.5096	0.676861	1.57272	1.92595	2.25487	0.473775	0.411848	-0.390289	0.452808	0.655418	0.813094	14.7809	13.059	2.62532	14.1739	21.2556	29.1359	1.96076	1.90098	1.2729	1.94031	2.14718	2.32331
517.5	0.314714	0.303702	0.167108	0.310186	0.374892	0.4418	2.39614	0.451	0.463	0.568	0.454	0.448	0.451	1.60637	1.50998	0.677258	1.57279	1.92634	2.25504	0.473975	0.412098	-0.389703	0.452853	0.655623	0.813168	14.8154	13.0908	2.63349	14.2025	21.3054	29.1966	1.96191	1.90214	1.27389	1.94129	2.14844	2.32452
517	0.314716	0.303921	0.167059	0.310577	0.375019	0.442015	2.39845	0.451	0.463	0.568	0.454	0.448	0.451	1.60638	1.51107	0.67706	1.57478	1.92699	2.25614	0.473982	0.412819	-0.389996	0.454113	0.655962	0.813655	14.8442	13.1351	2.63704	14.2659	21.3611	29.2815	1.96286	1.90374	1.27432	1.94346	2.14984	2.32621
516.5	0.314762	0.303951	0.167182	0.310697	0.374971	0.441923	2.40077	0.451	0.463	0.568	0.454	0.448	0.451	1.60661	1.51122	0.677558	1.57538	1.92675	2.25567	0.474128	0.412918	-0.38926	0.454499	0.655834	0.813447	14.8773	13.1631	2.64604	14.3046	21.397	29.326	1.96395	1.90476	1.27541	1.94477	2.15074	2.32709
516	0.314785	0.304122	0.16708	0.310796	0.37517	0.442083	2.4031	0.451	0.463	0.568	0.454	0.448	0.451	1.60673	1.51207	0.677145	1.57589	1.92777	2.25649	0.474201	0.41348	-0.38987	0.454818	0.656364	0.813809	14.9084	13.2035	2.64793	14.3415	21.4612	29.4042	1.96498	1.90622	1.27564	1.94603	2.15235	2.32864
515.5	0.314839	0.304112	0.167239	0.310867	0.375194	0.442206	2.40543	0.451	0.463	0.568	0.454	0.448	0.451	1.60701	1.51202	0.677789	1.57625	1.92789	2.25711	0.474372	0.413447	-0.388919	0.455046	0.656428	0.814087	14.9424	13.2282	2.65812	14.3759	21.5056	29.4776	1.9661	1.90711	1.27686	1.94719	2.15347	2.33009
515	0.31491	0.304366	0.167321	0.310903	0.375172	0.442213	2.40777	0.451	0.463	0.568	0.454	0.448	0.451	1.60737	1.51328	0.678121	1.57643	1.92778	2.25715	0.474598	0.414282	-0.388429	0.455162	0.65637	0.814103	14.9782	13.2761	2.6659	14.4071	21.5449	29.5359	1.96727	1.90883	1.27779	1.94825	2.15445	2.33124
514.5	0.314919	0.304452	0.167366	0.311137	0.375331	0.442363	2.41011	0.451	0.463	0.568	0.454	0.448	0.451	1.60741	1.51371	0.678304	1.57762	1.9286	2.25791	0.474626	0.414565	-0.38816	0.455914	0.656793	0.814442	15.0082	13.3094	2.67252	14.4569	21.6051	29.6134	1.96826	1.91003	1.27859	1.94993	2.15595	2.33277
514	0.314988	0.304371	0.167382	0.311486	0.375413	0.442351	2.41245	0.451	0.463	0.568	0.454	0.448	0.451	1.60777	1.51331	0.678369	1.57938	1.92902	2.25785	0.474846	0.414299	-0.388064	0.457036	0.657012	0.814415	15.044	13.3282	2.67823	14.5175	21.6566	29.6694	1.96943	1.9107	1.27927	1.95197	2.15724	2.33387
513.5	0.314969	0.304485	0.167422	0.311498	0.375413	0.44238	2.4148	0.451	0.463	0.568	0.454	0.448	0.451	1.60767	1.51388	0.678531	1.57945	1.92902	2.258	0.474785	0.414673	-0.387826	0.457074	0.657012	0.81448	15.0715	13.3642	2.68474	14.5469	21.6988	29.7311	1.97033	1.91199	1.28005	1.95296	2.15829	2.33509
513	0.31512	0.304676	0.167486	0.311597	0.375578	0.44244	2.41715	0.451	0.463	0.568	0.454	0.448	0.451	1.60844	1.51483	0.67879	1.57995	1.92987	2.25831	0.475264	0.4153	-0.387443	0.457392	0.657451	0.814616	15.1153	13.4071	2.69203	14.5846	21.7602	29.7972	1.97176	1.91352	1.28091	1.95422	2.15981	2.33638
512.5	0.315151	0.304734	0.167621	0.311683	0.375565	0.442346	2.41951	0.451	0.463	0.568	0.454	0.448	0.451	1.6086	1.51511	0.679337	1.58038	1.9298	2.25783	0.475363	0.415491	-0.386638	0.457668	0.657417	0.814403	15.1478	13.4384	2.70163	14.6211	21.8012	29.8427	1.97282	1.91464	1.28205	1.95544	2.16083	2.33727
512	0.315168	0.304915	0.167536	0.31203	0.375827	0.442663	2.42188	0.451	0.463	0.568	0.454	0.448	0.451	1.60868	1.51601	0.678993	1.58214	1.93115	2.25945	0.475417	0.416084	-0.387145	0.45878	0.658114	0.81512	15.1791	13.4806	2.70417	14.6823	21.8743	29.9438	1.97384	1.91614	1.28236	1.95749	2.16264	2.33925
511.5	0.315304	0.304732	0.16769	0.312047	0.37583	0.44268	2.42424	0.451	0.463	0.568	0.454	0.448	0.451	1.60938	1.5151	0.679617	1.58223	1.93116	2.25953	0.475848	0.415484	-0.386226	0.458835	0.658122	0.815158	15.2219	13.4908	2.71444	14.7127	21.9174	30.0047	1.97523	1.9165	1.28357	1.9585	2.1637	2.34044
511	0.315331	0.305082	0.167775	0.31238	0.375803	0.442786	2.42661	0.451	0.463	0.568	0.454	0.448	0.451	1.60952	1.51684	0.679961	1.58392	1.93102	2.26007	0.475934	0.416632	-0.385719	0.459902	0.65805	0.815398	15.2543	13.5483	2.72251	14.7729	21.9572	30.0779	1.97628	1.91854	1.28452	1.9605	2.16468	2.34186
510.5	0.315396	0.305055	0.167804	0.312473	0.375913	0.442851	2.42899	0.451	0.463	0.568	0.454	0.448	0.451	1.60985	1.51671	0.680079	1.58439	1.93159	2.26041	0.47614	0.416543	-0.385546	0.460199	0.658343	0.815544	15.2905	13.5724	2.72879	14.8107	22.0131	30.1457	1.97745	1.91939	1.28526	1.96175	2.16606	2.34318
510	0.315445	0.30508	0.167653	0.312152	0.376051	0.442798	2.43137	0.451	0.463	0.568	0.454	0.448	0.451	1.6101	1.51683	0.679467	1.58276	1.9323	2.26014	0.476295	0.416625	-0.386447	0.459171	0.65871	0.815425	15.3253	13.6013	2.72923	14.8093	22.0725	30.1976	1.97857	1.92041	1.28532	1.9617	2.16752	2.34419
509.5	0.315548	0.30509	0.167773	0.312194	0.376243	0.442782	2.43376	0.451	0.463	0.568	0.454	0.448	0.451	1.61062	1.51688	0.679953	1.58297	1.93328	2.26005	0.476622	0.416658	-0.385731	0.459306	0.65922	0.815389	15.3654	13.6289	2.7385	14.8424	22.1384	30.2547	1.97987	1.92139	1.28641	1.9628	2.16914	2.3453
509	0.315539	0.305281	0.167783	0.312477	0.376423	0.442755	2.43615	0.451	0.463	0.568	0.454	0.448	0.451	1.61058	1.51783	0.679994	1.58441	1.93421	2.25992	0.476593	0.417284	-0.385672	0.460212	0.659699	0.815328	15.3947	13.6728	2.74421	14.8985	22.2032	30.3104	1.98081	1.92293	1.28708	1.96465	2.17072	2.34638
508.5	0.315619	0.305264	0.167901	0.31269	0.376209	0.442862	2.43854	0.451	0.463	0.568	0.454	0.448	0.451	1.61099	1.51775	0.680472	1.58549	1.93311	2.26046	0.476847	0.417228	-0.384969	0.460893	0.65913	0.815569	15.4328	13.6981	2.75348	14.9482	22.2216	30.3848	1.98204	1.92382	1.28816	1.96629	2.17117	2.34782
508	0.315689	0.305465	0.168041	0.312575	0.37653	0.443034	2.44094	0.451	0.463	0.568	0.454	0.448	0.451	1.61134	1.51875	0.681039	1.58491	1.93476	2.26134	0.477069	0.417886	-0.384135	0.460526	0.659983	0.815957	15.4701	13.7432	2.76351	14.9666	22.3033	30.4683	1.98323	1.9254	1.28933	1.96689	2.17316	2.34943
507.5	0.31573	0.305374	0.16799	0.312855	0.376511	0.443026	2.44335	0.451	0.463	0.568	0.454	0.448	0.451	1.61155	1.5183	0.680833	1.58633	1.93466	2.2613	0.477198	0.417589	-0.384439	0.461421	0.659932	0.815939	15.5046	13.7621	2.76727	15.023	22.345	30.5272	1.98434	1.92607	1.28977	1.96874	2.17418	2.35056
507	0.315753	0.305662	0.168148	0.312969	0.376707	0.443228	2.44576	0.451	0.463	0.568	0.454	0.448	0.451	1.61167	1.51973	0.681473	1.5869	1.93567	2.26233	0.477271	0.418531	-0.383499	0.461785	0.660453	0.816395	15.5375	13.8153	2.77795	15.0636	22.4125	30.6154	1.98539	1.92792	1.29101	1.97007	2.17582	2.35226
506.5	0.315743	0.305778	0.168239	0.313074	0.376687	0.44333	2.44817	0.451	0.463	0.568	0.454	0.448	0.451	1.61162	1.5203	0.681842	1.58744	1.93557	2.26285	0.47724	0.418911	-0.382958	0.462121	0.6604	0.816625	15.5672	13.8531	2.78645	15.1035	22.4543	30.69	1.98633	1.92924	1.292	1.97138	2.17683	2.35369
506	0.315885	0.305844	0.168214	0.313347	0.376781	0.443411	2.45059	0.451	0.463	0.568	0.454	0.448	0.451	1.61234	1.52063	0.681741	1.58882	1.93605	2.26326	0.477689	0.419126	-0.383106	0.462992	0.660649	0.816808	15.612	13.8864	2.79113	15.1598	22.51	30.7619	1.98776	1.9304	1.29254	1.97321	2.17818	2.35507
505.5	0.315986	0.305999	0.168366	0.313354	0.376998	0.443326	2.45302	0.451	0.463	0.568	0.454	0.448	0.451	1.61286	1.5214	0.682357	1.58886	1.93716	2.26283	0.478009	0.419633	-0.382203	0.463015	0.661225	0.816616	15.6529	13.928	2.80171	15.1904	22.5805	30.8109	1.98906	1.93185	1.29377	1.97421	2.17988	2.35601
505	0.316044	0.305999	0.168369	0.313401	0.377043	0.443589	2.45545	0.451	0.463	0.568	0.454	0.448	0.451	1.61316	1.5214	0.682369	1.58909	1.9374	2.26417	0.478192	0.419633	-0.382185	0.463165	0.661344	0.817209	15.6897	13.9556	2.80736	15.2251	22.6306	30.9086	1.99023	1.9328	1.29442	1.97533	2.18109	2.35787
504.5	0.316094	0.306076	0.168382	0.313501	0.377292	0.443701	2.45788	0.451	0.463	0.568	0.454	0.448	0.451	1.61341	1.52179	0.682421	1.5896	1.93867	2.26474	0.478351	0.419885	-0.382108	0.463484	0.662005	0.817462	15.7257	13.9903	2.81337	15.265	22.7055	30.9856	1.99137	1.934	1.29511	1.97663	2.18289	2.35934
504	0.316116	0.306289	0.168634	0.313855	0.377334	0.443746	2.46032	0.451	0.463	0.568	0.454	0.448	0.451	1.61352	1.52285	0.683443	1.5914	1.93889	2.26497	0.47842	0.42058	-0.380612	0.464612	0.662116	0.817563	15.7592	14.0376	2.8274	15.3299	22.7556	31.0534	1.99243	1.93563	1.29672	1.97872	2.1841	2.36063
503.5	0.316147	0.306424	0.168552	0.313986	0.377343	0.443799	2.46276	0.451	0.463	0.568	0.454	0.448	0.451	1.61368	1.52352	0.68311	1.59206	1.93894	2.26524	0.478518	0.421021	-0.381099	0.46503	0.66214	0.817683	15.7936	14.0779	2.83026	15.3732	22.8019	31.1225	1.99352	1.93702	1.29705	1.98012	2.18521	2.36194
503	0.316168	0.306584	0.168618	0.314124	0.377531	0.444105	2.46521	0.451	0.463	0.568	0.454	0.448	0.451	1.61379	1.52431	0.683378	1.59276	1.9399	2.26681	0.478585	0.421543	-0.380707	0.465469	0.662638	0.818372	15.8271	14.1207	2.83811	15.4173	22.8701	31.2274	1.99457	1.93849	1.29795	1.98154	2.18684	2.36393
502.5	0.316308	0.306736	0.168627	0.314369	0.377559	0.444148	2.46766	0.451	0.463	0.568	0.454	0.448	0.451	1.6145	1.52507	0.683414	1.594	1.94005	2.26703	0.479027	0.422039	-0.380654	0.466249	0.662712	0.818469	15.8726	14.1628	2.84406	15.4721	22.919	31.2957	1.99601	1.93994	1.29863	1.9833	2.18801	2.36522
502	0.316321	0.306741	0.168808	0.314442	0.377662	0.444331	2.47012	0.451	0.463	0.568	0.454	0.448	0.451	1.61457	1.52509	0.684148	1.59437	1.94058	2.26796	0.479068	0.422055	-0.379581	0.466481	0.662985	0.818881	15.9056	14.1915	2.85585	15.5101	22.9772	31.3839	1.99704	1.94092	1.29997	1.98451	2.1894	2.36688
501.5	0.316416	0.306794	0.168955	0.314513	0.377599	0.444451	2.47258	0.451	0.463	0.568	0.454	0.448	0.451	1.61505	1.52536	0.684744	1.59473	1.94025	2.26857	0.479369	0.422228	-0.378711	0.466707	0.662818	0.819151	15.9469	14.2247	2.86654	15.5481	23.0154	31.4635	1.99834	1.94205	1.30119	1.98573	2.1903	2.36838
501	0.316444	0.306917	0.168913	0.314745	0.377901	0.444372	2.47505	0.451	0.463	0.568	0.454	0.448	0.451	1.6152	1.52597	0.684573	1.59591	1.9418	2.26817	0.479457	0.422629	-0.378959	0.467444	0.663617	0.818973	15.9816	14.2646	2.87083	15.6022	23.0982	31.5151	1.99942	1.94341	1.30167	1.98745	2.19227	2.36935
500.5	0.316472	0.306999	0.168901	0.314935	0.378026	0.444251	2.47752	0.451	0.463	0.568	0.454	0.448	0.451	1.61534	1.52638	0.684525	1.59687	1.94245	2.26755	0.479546	0.422896	-0.37903	0.468047	0.663948	0.818701	16.0163	14.3007	2.87616	15.6522	23.1597	31.5609	2.00051	1.94464	1.30228	1.98904	2.19373	2.37021
500	0.316549	0.307114	0.168945	0.315017	0.377878	0.444522	2.48	0.451	0.463	0.568	0.454	0.448	0.451	1.61573	1.52695	0.684703	1.59729	1.94169	2.26893	0.479789	0.42327	-0.37877	0.468308	0.663556	0.819311	16.0562	14.3401	2.88342	15.6917	23.1879	31.6627	2.00175	1.94598	1.3031	1.9903	2.1944	2.37212
499.5	0.316523	0.307118	0.169087	0.315251	0.378068	0.444547	2.48248	0.451	0.463	0.568	0.454	0.448	0.451	1.6156	1.52697	0.685279	1.59848	1.94266	2.26906	0.479707	0.423283	-0.37793	0.46905	0.664059	0.819367	16.0857	14.3692	2.89406	15.7465	23.2577	31.7297	2.00267	1.94696	1.3043	1.99203	2.19605	2.37337
499	0.316652	0.307362	0.16909	0.315272	0.378168	0.444605	2.48497	0.451	0.463	0.568	0.454	0.448	0.451	1.61626	1.52818	0.685291	1.59858	1.94318	2.26936	0.480114	0.424077	-0.377912	0.469117	0.664324	0.819497	16.1311	14.4209	2.89996	15.7802	23.3167	31.8016	2.00408	1.94871	1.30496	1.9931	2.19744	2.37472
498.5	0.316736	0.307517	0.169095	0.315396	0.378133	0.444723	2.48746	0.451	0.463	0.568	0.454	0.448	0.451	1.61669	1.52895	0.685311	1.59921	1.943	2.26996	0.48038	0.424582	-0.377882	0.46951	0.664231	0.819763	16.1721	14.4644	2.90595	15.8243	23.3591	31.8823	2.00536	1.95018	1.30564	1.99449	2.19844	2.37622
498	0.316813	0.307574	0.16926	0.315533	0.378012	0.445059	2.48996	0.451	0.463	0.568	0.454	0.448	0.451	1.61708	1.52923	0.68598	1.59991	1.94237	2.27168	0.480623	0.424767	-0.376907	0.469944	0.663911	0.820518	16.2124	14.4988	2.91748	15.8699	23.3911	31.9947	2.00661	1.95134	1.30693	1.99592	2.19919	2.37831
497.5	0.316812	0.30756	0.169214	0.315705	0.378274	0.445185	2.49246	0.451	0.463	0.568	0.454	0.448	0.451	1.61708	1.52916	0.685793	1.60078	1.94372	2.27232	0.48062	0.424721	-0.377179	0.470489	0.664604	0.820801	16.2449	14.5267	2.92175	15.9191	23.4706	32.0772	2.00761	1.95228	1.30741	1.99747	2.20106	2.37985
497	0.316902	0.307822	0.169319	0.315837	0.378543	0.445087	2.49497	0.451	0.463	0.568	0.454	0.448	0.451	1.61754	1.53047	0.686219	1.60145	1.9451	2.27182	0.480904	0.425573	-0.376559	0.470907	0.665315	0.820581	16.2869	14.5807	2.93127	15.9645	23.5513	32.1276	2.00891	1.95409	1.30847	1.99889	2.20295	2.38078
496.5	0.316929	0.307859	0.169359	0.315993	0.378538	0.445139	2.49748	0.451	0.463	0.568	0.454	0.448	0.451	1.61767	1.53065	0.686381	1.60224	1.94508	2.27208	0.480989	0.425693	-0.376322	0.471401	0.665302	0.820698	16.3225	14.6136	2.93857	16.0125	23.5982	32.1998	2.01	1.95519	1.30928	2.00039	2.20404	2.38212
496	0.316981	0.30812	0.169411	0.316089	0.378543	0.445267	2.5	0.451	0.463	0.568	0.454	0.448	0.451	1.61794	1.53195	0.686592	1.60272	1.9451	2.27274	0.481153	0.426541	-0.376015	0.471705	0.665315	0.820985	16.3608	14.6679	2.9463	16.0545	23.6464	32.2833	2.01118	1.95701	1.31014	2.0017	2.20517	2.38366
495.5	0.31706	0.308159	0.169415	0.316203	0.378736	0.445364	2.50252	0.451	0.463	0.568	0.454	0.448	0.451	1.61834	1.53214	0.686608	1.6033	1.94609	2.27323	0.481402	0.426667	-0.375992	0.472066	0.665824	0.821203	16.402	14.7013	2.95239	16.0986	23.7183	32.3626	2.01245	1.95812	1.31082	2.00307	2.20684	2.38512
495	0.317141	0.308214	0.16958	0.316295	0.37886	0.445485	2.50505	0.451	0.463	0.568	0.454	0.448	0.451	1.61876	1.53242	0.687277	1.60377	1.94673	2.27385	0.481657	0.426846	-0.375018	0.472356	0.666152	0.821475	16.4435	14.7362	2.96412	16.1405	23.7818	32.4457	2.01372	1.95928	1.31212	2.00438	2.20832	2.38665
494.5	0.3172	0.308339	0.169499	0.316502	0.37876	0.44552	2.50758	0.451	0.463	0.568	0.454	0.448	0.451	1.61906	1.53304	0.686948	1.60482	1.94622	2.27403	0.481843	0.427251	-0.375496	0.473011	0.665888	0.821553	16.4829	14.778	2.96728	16.1943	23.8174	32.5164	2.01492	1.96067	1.31247	2.00604	2.20914	2.38795
494	0.317249	0.308568	0.169635	0.316633	0.378949	0.445709	2.51012	0.451	0.463	0.568	0.454	0.448	0.451	1.61931	1.53418	0.6875	1.60548	1.94719	2.27499	0.481998	0.427993	-0.374694	0.473424	0.666387	0.821977	16.5214	14.83	2.97807	16.2406	23.8894	32.6099	2.0161	1.96239	1.31366	2.00748	2.21081	2.38967
493.5	0.317383	0.308583	0.169692	0.316832	0.379078	0.445783	2.51266	0.451	0.463	0.568	0.454	0.448	0.451	1.61999	1.53425	0.687731	1.60649	1.94785	2.27537	0.48242	0.428042	-0.374358	0.474053	0.666727	0.822143	16.5689	14.8615	2.98611	16.2939	23.9542	32.6869	2.01755	1.96343	1.31455	2.00912	2.21231	2.39108
493	0.317337	0.308745	0.169826	0.317088	0.379374	0.445942	2.51521	0.451	0.463	0.568	0.454	0.448	0.451	1.61976	1.53506	0.688274	1.60779	1.94937	2.27618	0.482275	0.428567	-0.373569	0.47486	0.667508	0.8225	16.5977	14.9073	2.9969	16.3534	24.0403	32.7766	2.01842	1.96494	1.31573	2.01095	2.21429	2.39271
492.5	0.317433	0.308979	0.169885	0.317201	0.37941	0.445997	2.51777	0.451	0.463	0.568	0.454	0.448	0.451	1.62025	1.53622	0.688513	1.60836	1.94956	2.27646	0.482578	0.429325	-0.373221	0.475217	0.667602	0.822623	16.6415	14.9602	3.00507	16.3983	24.0937	32.8513	2.01975	1.96668	1.31663	2.01233	2.21552	2.39408
492	0.317505	0.309165	0.169888	0.317328	0.379688	0.445997	2.52033	0.451	0.463	0.568	0.454	0.448	0.451	1.62061	1.53714	0.688525	1.60901	1.95099	2.27646	0.482805	0.429926	-0.373204	0.475617	0.668335	0.822623	16.6829	15.0087	3.01129	16.4448	24.1781	32.9181	2.02101	1.96827	1.31731	2.01376	2.21746	2.39529
491.5	0.317571	0.309273	0.169929	0.31737	0.379744	0.446151	2.52289	0.451	0.463	0.568	0.454	0.448	0.451	1.62095	1.53768	0.688691	1.60922	1.95127	2.27725	0.483012	0.430276	-0.372962	0.475749	0.668482	0.822968	16.7238	15.0497	3.01888	16.4826	24.2344	33.0079	2.02225	1.96962	1.31814	2.01492	2.21875	2.39692
491	0.317682	0.30934	0.17019	0.317881	0.379998	0.446326	2.52546	0.451	0.463	0.568	0.454	0.448	0.451	1.62152	1.53801	0.689749	1.61181	1.95258	2.27814	0.483362	0.430492	-0.371428	0.477358	0.669151	0.823361	16.7696	15.0869	3.03433	16.5695	24.3163	33.1011	2.02363	1.97084	1.31982	2.01756	2.22062	2.39862
490.5	0.317673	0.309469	0.170137	0.317731	0.380088	0.446245	2.52803	0.451	0.463	0.568	0.454	0.448	0.451	1.62147	1.53866	0.689534	1.61105	1.95304	2.27773	0.483334	0.430909	-0.371739	0.476886	0.669388	0.823179	16.8029	15.1303	3.03862	16.5876	24.3775	33.1566	2.02463	1.97225	1.32029	2.01811	2.22202	2.39962
490	0.317738	0.309637	0.170299	0.318037	0.380255	0.446668	2.53061	0.451	0.463	0.568	0.454	0.448	0.451	1.6218	1.53949	0.690191	1.6126	1.9539	2.27989	0.483538	0.431452	-0.370787	0.477849	0.669827	0.824127	16.8441	15.1777	3.05063	16.6535	24.4487	33.2873	2.02587	1.97379	1.32159	2.02012	2.22364	2.40198
489.5	0.317777	0.30976	0.170271	0.318204	0.380296	0.446832	2.5332	0.451	0.463	0.568	0.454	0.448	0.451	1.622	1.5401	0.690077	1.61345	1.95411	2.28073	0.483661	0.431849	-0.370952	0.478374	0.669935	0.824494	16.8826	15.2208	3.05586	16.7051	24.504	33.3798	2.02703	1.97519	1.32216	2.02168	2.22489	2.40365
489	0.317908	0.309942	0.170423	0.318272	0.380334	0.446973	2.53579	0.451	0.463	0.568	0.454	0.448	0.451	1.62267	1.54101	0.690693	1.61379	1.95431	2.28145	0.484073	0.432436	-0.37006	0.478587	0.670035	0.824809	16.9311	15.2699	3.06758	16.7464	24.559	33.4692	2.02848	1.97678	1.32342	2.02293	2.22614	2.40526
488.5	0.317887	0.310034	0.170476	0.318417	0.380359	0.446995	2.53838	0.451	0.463	0.568	0.454	0.448	0.451	1.62256	1.54146	0.690908	1.61453	1.95443	2.28156	0.484007	0.432733	-0.369749	0.479043	0.670101	0.824858	16.9636	15.3102	3.07578	16.796	24.6125	33.5411	2.02945	1.97809	1.32431	2.02442	2.22735	2.40655
488	0.317944	0.310278	0.170565	0.318796	0.3807	0.446983	2.54098	0.451	0.463	0.568	0.454	0.448	0.451	1.62285	1.54268	0.691269	1.61645	1.95619	2.2815	0.484186	0.43352	-0.369227	0.480233	0.670997	0.824832	17.0044	15.3658	3.0853	16.8705	24.7072	33.608	2.03068	1.97988	1.32533	2.02667	2.22949	2.40775
487.5	0.318009	0.310402	0.170575	0.318854	0.38075	0.447069	2.54359	0.451	0.463	0.568	0.454	0.448	0.451	1.62319	1.54329	0.691309	1.61674	1.95644	2.28194	0.484391	0.433919	-0.369168	0.480414	0.671128	0.825024	17.0463	15.4096	3.092	16.9113	24.7644	33.69	2.03192	1.98129	1.32605	2.02789	2.23078	2.40921
487	0.318105	0.310437	0.170586	0.319129	0.380924	0.447442	2.5462	0.451	0.463	0.568	0.454	0.448	0.451	1.62368	1.54347	0.691354	1.61814	1.95734	2.28384	0.484692	0.434032	-0.369104	0.481277	0.671585	0.825858	17.0917	15.4448	3.09875	16.9753	24.838	33.8156	2.03327	1.98242	1.32677	2.0298	2.23244	2.41145
486.5	0.318247	0.310702	0.170622	0.319159	0.380921	0.447429	2.54882	0.451	0.463	0.568	0.454	0.448	0.451	1.6244	1.54479	0.6915	1.61829	1.95732	2.28377	0.485139	0.434886	-0.368893	0.481371	0.671577	0.825829	17.1421	15.503	3.10643	17.0134	24.8887	33.8831	2.03477	1.98428	1.32759	2.03094	2.23357	2.41266
486	0.318213	0.310821	0.170744	0.319384	0.381192	0.447492	2.55144	0.451	0.463	0.568	0.454	0.448	0.451	1.62423	1.54538	0.691994	1.61943	1.95871	2.28409	0.485032	0.435268	-0.368178	0.482075	0.672288	0.82597	17.1737	15.5468	3.11728	17.0725	24.9754	33.9624	2.03571	1.98568	1.32875	2.0327	2.23552	2.41407
485.5	0.318313	0.310945	0.170751	0.319556	0.381005	0.447488	2.55407	0.451	0.463	0.568	0.454	0.448	0.451	1.62474	1.54599	0.692023	1.6203	1.95775	2.28407	0.485346	0.435667	-0.368137	0.482614	0.671798	0.825961	17.2199	15.5912	3.12396	17.1261	25.0024	34.0318	2.03708	1.9871	1.32946	2.0343	2.23612	2.4153
485	0.31835	0.311068	0.1708	0.319764	0.381209	0.44778	2.5567	0.451	0.463	0.568	0.454	0.448	0.451	1.62493	1.54661	0.692221	1.62136	1.9588	2.28556	0.485462	0.436063	-0.36785	0.483264	0.672333	0.826613	17.2595	15.6358	3.1322	17.1838	25.0808	34.1466	2.03825	1.98852	1.33034	2.03601	2.23787	2.41733
484.5	0.318429	0.311113	0.170798	0.319861	0.381335	0.447712	2.55934	0.451	0.463	0.568	0.454	0.448	0.451	1.62533	1.54683	0.692213	1.62185	1.95945	2.28522	0.485711	0.436207	-0.367862	0.483568	0.672663	0.826461	17.3037	15.6726	3.1386	17.2297	25.1492	34.2067	2.03955	1.98969	1.33102	2.03737	2.2394	2.4184
484	0.318447	0.311306	0.171012	0.32012	0.381461	0.447911	2.56198	0.451	0.463	0.568	0.454	0.448	0.451	1.62542	1.54779	0.69308	1.62316	1.9601	2.28623	0.485767	0.436828	-0.366609	0.484377	0.672994	0.826906	17.3414	15.7245	3.15297	17.2933	25.2178	34.3079	2.04066	1.99133	1.33254	2.03924	2.24092	2.42018
483.5	0.318445	0.311396	0.171012	0.320203	0.381469	0.447964	2.56463	0.451	0.463	0.568	0.454	0.448	0.451	1.62541	1.54824	0.69308	1.62358	1.96014	2.2865	0.485761	0.437117	-0.366609	0.484636	0.673015	0.827024	17.3771	15.7661	3.15949	17.338	25.2711	34.387	2.04171	1.99265	1.33323	2.04056	2.2421	2.42158
483	0.318547	0.311453	0.171046	0.320398	0.381669	0.448067	2.56729	0.451	0.463	0.568	0.454	0.448	0.451	1.62593	1.54852	0.693218	1.62457	1.96117	2.28703	0.486081	0.4373	-0.366411	0.485245	0.673539	0.827254	17.4242	15.8046	3.1673	17.3951	25.35	34.4741	2.04309	1.99386	1.33405	2.04224	2.24385	2.42311
482.5	0.318595	0.311571	0.171194	0.320499	0.381617	0.448031	2.56995	0.451	0.463	0.568	0.454	0.448	0.451	1.62618	1.54911	0.693818	1.62509	1.9609	2.28685	0.486232	0.437678	-0.365546	0.48556	0.673403	0.827173	17.4656	15.8493	3.17936	17.4422	25.3956	34.54	2.04431	1.99528	1.33532	2.04362	2.24486	2.42427
482	0.318691	0.311859	0.171159	0.320772	0.381821	0.448205	2.57261	0.451	0.463	0.568	0.454	0.448	0.451	1.62667	1.55054	0.693676	1.62647	1.96195	2.28773	0.486533	0.438602	-0.36575	0.486412	0.673937	0.827562	17.5124	15.9116	3.18466	17.5082	25.4755	34.6386	2.04567	1.99723	1.33587	2.04555	2.24663	2.426
481.5	0.318724	0.311922	0.171257	0.321026	0.381954	0.448282	2.57529	0.451	0.463	0.568	0.454	0.448	0.451	1.62684	1.55085	0.694073	1.62776	1.96263	2.28813	0.486636	0.438804	-0.365178	0.487203	0.674285	0.827733	17.5525	15.9511	3.19493	17.5724	25.5463	34.7225	2.04684	1.99847	1.33695	2.04742	2.24818	2.42746
481	0.318861	0.312114	0.171224	0.321142	0.382231	0.4482	2.57796	0.451	0.463	0.568	0.454	0.448	0.451	1.62753	1.55181	0.69394	1.62835	1.96405	2.28771	0.487066	0.43942	-0.36537	0.487565	0.67501	0.827551	17.6041	16.004	3.20034	17.6216	25.6366	34.782	2.04835	2.00012	1.33752	2.04886	2.25017	2.4285
480.5	0.318851	0.312185	0.171315	0.321268	0.382248	0.448631	2.58065	0.451	0.463	0.568	0.454	0.448	0.451	1.62748	1.55216	0.694308	1.62898	1.96414	2.28991	0.487035	0.439647	-0.364839	0.487957	0.675055	0.828512	17.6396	16.0446	3.21042	17.6722	25.6922	34.9215	2.04938	2.00139	1.33857	2.05032	2.25139	2.43093
480	0.318914	0.312442	0.171365	0.321481	0.382548	0.448662	2.58333	0.451	0.463	0.568	0.454	0.448	0.451	1.6278	1.55344	0.694511	1.63006	1.96568	2.29007	0.487232	0.44047	-0.364547	0.48862	0.675839	0.828581	17.6834	16.1045	3.21899	17.7325	25.7862	34.9991	2.05065	2.00326	1.33946	2.05207	2.25344	2.43228
479.5	0.318953	0.312528	0.171437	0.321686	0.382647	0.448652	2.58603	0.451	0.463	0.568	0.454	0.448	0.451	1.628	1.55386	0.694803	1.6311	1.96619	2.29002	0.487355	0.440745	-0.364127	0.489257	0.676098	0.828559	17.7246	16.147	3.22841	17.7922	25.8534	35.0706	2.05184	2.00458	1.34044	2.0538	2.25491	2.43352
479	0.319012	0.312698	0.17166	0.321715	0.382859	0.448964	2.58873	0.451	0.463	0.568	0.454	0.448	0.451	1.62831	1.55471	0.695707	1.63125	1.96728	2.29161	0.48754	0.441289	-0.362827	0.489347	0.676652	0.829254	17.7682	16.1984	3.24358	17.8326	25.9361	35.1927	2.0531	2.00617	1.34201	2.05496	2.25671	2.43564
478.5	0.319132	0.313028	0.17169	0.32176	0.382893	0.449062	2.59143	0.451	0.463	0.568	0.454	0.448	0.451	1.62892	1.55635	0.695828	1.63148	1.96745	2.29211	0.487916	0.442344	-0.362653	0.489487	0.676741	0.829472	17.8188	16.2665	3.2515	17.8749	25.9949	35.2817	2.05456	2.00828	1.34283	2.05618	2.25799	2.43718
478	0.319192	0.313104	0.171803	0.322426	0.383224	0.448999	2.59414	0.451	0.463	0.568	0.454	0.448	0.451	1.62922	1.55673	0.696286	1.63486	1.96916	2.29179	0.488104	0.442587	-0.361995	0.491555	0.677605	0.829332	17.8628	16.3085	3.26259	17.9865	26.0944	35.3456	2.05583	2.00957	1.34397	2.05938	2.26015	2.43828
477.5	0.319379	0.313216	0.171951	0.322382	0.38318	0.449205	2.59686	0.451	0.463	0.568	0.454	0.448	0.451	1.63018	1.55729	0.696886	1.63463	1.96893	2.29284	0.488689	0.442944	-0.361134	0.491418	0.67749	0.82979	17.9212	16.3543	3.27507	18.0193	26.1431	35.4522	2.05751	2.01098	1.34526	2.06032	2.2612	2.44012
477	0.31939	0.313597	0.171999	0.322836	0.383451	0.449188	2.59958	0.451	0.463	0.568	0.454	0.448	0.451	1.63023	1.55918	0.69708	1.63693	1.97032	2.29275	0.488724	0.44416	-0.360854	0.492826	0.678197	0.829752	17.96	16.4285	3.28377	18.108	26.235	35.5239	2.05862	2.01326	1.34615	2.06285	2.26319	2.44135
476.5	0.319422	0.313914	0.171996	0.322838	0.383799	0.449399	2.60231	0.451	0.463	0.568	0.454	0.448	0.451	1.6304	1.56076	0.697068	1.63695	1.97211	2.29383	0.488824	0.44517	-0.360872	0.492832	0.679104	0.830222	18.0013	16.4963	3.29055	18.1462	26.3378	35.6319	2.05981	2.01533	1.34684	2.06394	2.2654	2.4432
476	0.319532	0.313865	0.172165	0.322967	0.383842	0.449416	2.60504	0.451	0.463	0.568	0.454	0.448	0.451	1.63096	1.56051	0.697753	1.6376	1.97233	2.29391	0.489168	0.445014	-0.35989	0.493231	0.679216	0.83026	18.0516	16.5259	3.30395	18.1989	26.3991	35.7095	2.06124	2.01623	1.34821	2.06543	2.26672	2.44453
475.5	0.319599	0.314009	0.172154	0.323223	0.383793	0.449308	2.60778	0.451	0.463	0.568	0.454	0.448	0.451	1.6313	1.56123	0.697709	1.6389	1.97208	2.29336	0.489378	0.445473	-0.359954	0.494024	0.679088	0.83002	18.0972	16.5758	3.31048	18.2661	26.4479	35.7675	2.06254	2.01776	1.34888	2.06734	2.26776	2.44552
475	0.319726	0.314261	0.172236	0.323609	0.383938	0.449599	2.61053	0.451	0.463	0.568	0.454	0.448	0.451	1.63195	1.56248	0.698041	1.64085	1.97282	2.29485	0.489775	0.446275	-0.359477	0.495217	0.679466	0.830667	18.1497	16.6374	3.32061	18.3483	26.5236	35.8892	2.06404	2.01963	1.34991	2.06966	2.26939	2.4476
474.5	0.319762	0.314393	0.172267	0.323656	0.384098	0.449601	2.61328	0.451	0.463	0.568	0.454	0.448	0.451	1.63213	1.56314	0.698167	1.64109	1.97365	2.29486	0.489888	0.446695	-0.359298	0.495362	0.679883	0.830671	18.1921	16.6865	3.32881	18.3923	26.6017	35.9652	2.06524	2.02112	1.35074	2.0709	2.27105	2.4489
474	0.319852	0.314863	0.172499	0.32376	0.384198	0.449932	2.61603	0.451	0.463	0.568	0.454	0.448	0.451	1.63259	1.56547	0.699107	1.64162	1.97416	2.29655	0.490169	0.448189	-0.357952	0.495684	0.680143	0.831407	18.2407	16.7718	3.34483	18.443	26.6717	36.0942	2.06662	2.02369	1.35236	2.07233	2.27255	2.45109
473.5	0.319877	0.314954	0.17239	0.324027	0.384456	0.449863	2.6188	0.451	0.463	0.568	0.454	0.448	0.451	1.63272	1.56593	0.698665	1.64297	1.97549	2.2962	0.490248	0.448478	-0.358584	0.496508	0.680814	0.831254	18.2821	16.8169	3.34766	18.5125	26.764	36.1594	2.06779	2.02505	1.35265	2.07427	2.27451	2.4522
473	0.319964	0.31508	0.172388	0.324227	0.38451	0.45008	2.62156	0.451	0.463	0.568	0.454	0.448	0.451	1.63316	1.56655	0.698657	1.64399	1.97576	2.2973	0.490519	0.448878	-0.358595	0.497125	0.680955	0.831736	18.3308	16.866	3.35466	18.5746	26.8282	36.2709	2.06917	2.02653	1.35336	2.07601	2.27587	2.45408
472.5	0.320025	0.315134	0.172516	0.324355	0.384651	0.450174	2.62434	0.451	0.463	0.568	0.454	0.448	0.451	1.63348	1.56682	0.699176	1.64464	1.97649	2.29778	0.49071	0.449049	-0.357853	0.49752	0.681322	0.831945	18.3766	16.9075	3.36676	18.6286	26.9047	36.3629	2.07046	2.02777	1.35458	2.07752	2.27749	2.45564
472	0.320097	0.315529	0.172563	0.324592	0.384986	0.450442	2.62712	0.451	0.463	0.568	0.454	0.448	0.451	1.63384	1.56879	0.699366	1.64584	1.97821	2.29915	0.490935	0.450302	-0.357581	0.49825	0.682192	0.83254	18.4238	16.9858	3.37574	18.6954	27.0087	36.4833	2.07179	2.03012	1.35548	2.07938	2.27969	2.45767
471.5	0.320105	0.315583	0.172609	0.324741	0.384881	0.450467	2.6299	0.451	0.463	0.568	0.454	0.448	0.451	1.63388	1.56905	0.699553	1.64659	1.97767	2.29928	0.49096	0.450473	-0.357314	0.498709	0.681919	0.832596	18.4639	17.0277	3.3847	18.7522	27.0513	36.5648	2.07291	2.03137	1.35638	2.08096	2.28059	2.45904
471	0.320117	0.315589	0.1727	0.324869	0.385076	0.450556	2.6327	0.451	0.463	0.568	0.454	0.448	0.451	1.63395	1.56908	0.699921	1.64724	1.97867	2.29973	0.490998	0.450492	-0.356787	0.499103	0.682426	0.832793	18.5045	17.0645	3.39547	18.8069	27.1362	36.657	2.07405	2.03247	1.35745	2.08247	2.28238	2.46059
470.5	0.320252	0.315761	0.172762	0.325015	0.385025	0.450418	2.63549	0.451	0.463	0.568	0.454	0.448	0.451	1.63463	1.56994	0.700173	1.64798	1.97841	2.29903	0.491419	0.451037	-0.356428	0.499552	0.682293	0.832487	18.5595	17.1194	3.40514	18.8638	27.1867	36.7124	2.07559	2.0341	1.35842	2.08405	2.28344	2.46152
470	0.320276	0.315874	0.172887	0.325377	0.385226	0.450563	2.6383	0.451	0.463	0.568	0.454	0.448	0.451	1.63476	1.5705	0.700679	1.64982	1.97944	2.29977	0.491494	0.451395	-0.355705	0.500666	0.682815	0.832809	18.6018	17.1682	3.41733	18.9461	27.273	36.8143	2.07677	2.03555	1.35963	2.08632	2.28525	2.46322
469.5	0.32038	0.316105	0.172782	0.325553	0.385401	0.450695	2.64111	0.451	0.463	0.568	0.454	0.448	0.451	1.63529	1.57165	0.700254	1.65071	1.98034	2.30044	0.491819	0.452126	-0.356312	0.501206	0.683269	0.833102	18.6535	17.2299	3.42045	19.007	27.356	36.9143	2.07821	2.03737	1.35994	2.08799	2.28698	2.4649
469	0.32044	0.31623	0.173035	0.325728	0.385519	0.450995	2.64392	0.451	0.463	0.568	0.454	0.448	0.451	1.63559	1.57227	0.701279	1.6516	1.98095	2.30197	0.492006	0.452521	-0.354849	0.501744	0.683576	0.833767	18.7003	17.2803	3.43779	19.0681	27.4311	37.0424	2.07952	2.03886	1.36166	2.08967	2.28855	2.46703
468.5	0.320534	0.316453	0.173051	0.325845	0.38563	0.451066	2.64674	0.451	0.463	0.568	0.454	0.448	0.451	1.63607	1.57338	0.701344	1.65219	1.98152	2.30234	0.492299	0.453226	-0.354757	0.502103	0.683863	0.833925	18.7512	17.3417	3.44577	19.1225	27.5056	37.1332	2.08093	2.04067	1.36245	2.09116	2.2901	2.46854
468	0.32059	0.316685	0.173031	0.326069	0.385755	0.451098	2.64957	0.451	0.463	0.568	0.454	0.448	0.451	1.63636	1.57453	0.701263	1.65333	1.98216	2.3025	0.492474	0.453959	-0.354872	0.50279	0.684188	0.833996	18.7979	17.4042	3.45234	19.1898	27.5822	37.2178	2.08222	2.04251	1.3631	2.09299	2.2917	2.46995
467.5	0.320581	0.316732	0.17305	0.326233	0.385824	0.451107	2.65241	0.451	0.463	0.568	0.454	0.448	0.451	1.63631	1.57477	0.70134	1.65416	1.98252	2.30255	0.492446	0.454107	-0.354763	0.503293	0.684366	0.834016	18.8371	17.4467	3.46049	19.2502	27.6512	37.299	2.08331	2.04375	1.36391	2.09464	2.29313	2.47129
467	0.320754	0.317166	0.173397	0.326546	0.386046	0.451399	2.65525	0.451	0.463	0.568	0.454	0.448	0.451	1.6372	1.57692	0.702746	1.65575	1.98366	2.30404	0.492985	0.455477	-0.352759	0.504252	0.684942	0.834663	18.8978	17.532	3.48182	19.3285	27.7423	37.4273	2.08498	2.04625	1.366	2.09676	2.29502	2.47342
466.5	0.320808	0.317269	0.173337	0.32661	0.386214	0.4515	2.65809	0.451	0.463	0.568	0.454	0.448	0.451	1.63747	1.57744	0.702503	1.65607	1.98452	2.30455	0.493154	0.455801	-0.353105	0.504448	0.685377	0.834886	18.9447	17.581	3.48688	19.3775	27.826	37.5243	2.08628	2.04767	1.3665	2.09809	2.29674	2.47502
466	0.320906	0.31753	0.17345	0.326806	0.386577	0.451563	2.66094	0.451	0.463	0.568	0.454	0.448	0.451	1.63797	1.57873	0.702961	1.65706	1.98638	2.30487	0.493459	0.456624	-0.352454	0.505048	0.686316	0.835026	18.997	17.6478	3.49892	19.4424	27.9382	37.6154	2.08771	2.04962	1.36768	2.09985	2.29906	2.47652
465.5	0.320928	0.317635	0.173623	0.326858	0.386726	0.451695	2.6638	0.451	0.463	0.568	0.454	0.448	0.451	1.63808	1.57926	0.703662	1.65733	1.98715	2.30555	0.493528	0.456954	-0.351457	0.505207	0.686702	0.835318	19.0404	17.6974	3.51344	19.4904	28.0198	37.7183	2.08891	2.05106	1.36909	2.10114	2.30073	2.47821
465	0.321072	0.318056	0.173605	0.327344	0.386748	0.451912	2.66667	0.451	0.463	0.568	0.454	0.448	0.451	1.63882	1.58135	0.703589	1.65979	1.98726	2.30666	0.493976	0.458279	-0.351561	0.506693	0.686758	0.835798	19.0985	17.7825	3.52027	19.5905	28.0833	37.8358	2.0905	2.05352	1.36976	2.10383	2.30204	2.48014
464.5	0.321136	0.318093	0.173874	0.327596	0.386844	0.452007	2.66954	0.451	0.463	0.568	0.454	0.448	0.451	1.63915	1.58153	0.704679	1.66107	1.98776	2.30714	0.494176	0.458395	-0.350012	0.507462	0.687007	0.836009	19.1473	17.825	3.53879	19.6629	28.1578	37.9332	2.09183	2.05474	1.37156	2.10578	2.30356	2.48173
464	0.321157	0.318292	0.173881	0.327596	0.387303	0.452016	2.67241	0.451	0.463	0.568	0.454	0.448	0.451	1.63925	1.58252	0.704708	1.66107	1.99011	2.30719	0.494241	0.45902	-0.349972	0.507462	0.688192	0.836029	19.1911	17.8858	3.54671	19.7053	28.2855	38.0165	2.09303	2.05649	1.37232	2.10691	2.30617	2.48309
463.5	0.321317	0.318441	0.173955	0.327709	0.387271	0.452198	2.6753	0.451	0.463	0.568	0.454	0.448	0.451	1.64007	1.58326	0.705008	1.66164	1.98995	2.30811	0.494739	0.459488	-0.349546	0.507807	0.68811	0.836431	19.2517	17.9412	3.55739	19.7615	28.3419	38.1293	2.09468	2.05808	1.37336	2.10841	2.30732	2.48493
463	0.321284	0.318848	0.174027	0.32805	0.387605	0.45227	2.67819	0.451	0.463	0.568	0.454	0.448	0.451	1.6399	1.58529	0.7053	1.66337	1.99167	2.30848	0.494636	0.460766	-0.349133	0.508847	0.688972	0.83659	19.2893	18.0259	3.56803	19.8454	28.4521	38.2239	2.0957	2.06051	1.37438	2.11064	2.30956	2.48647
462.5	0.321391	0.31897	0.174063	0.32825	0.387643	0.452413	2.68108	0.451	0.463	0.568	0.454	0.448	0.451	1.64045	1.58589	0.705445	1.66439	1.99186	2.30921	0.494969	0.461148	-0.348926	0.509457	0.68907	0.836906	19.3439	18.0787	3.57723	19.9126	28.5193	38.3308	2.09718	2.06202	1.37527	2.11243	2.31092	2.48821
462	0.321513	0.319213	0.174139	0.328455	0.387806	0.452732	2.68398	0.451	0.463	0.568	0.454	0.448	0.451	1.64107	1.5871	0.705753	1.66543	1.9927	2.31084	0.495349	0.46191	-0.348489	0.510081	0.68949	0.837611	19.4006	18.1455	3.58811	19.9807	28.6051	38.468	2.09872	2.06392	1.37631	2.11423	2.31265	2.49043
461.5	0.321602	0.319324	0.174235	0.328739	0.387775	0.452837	2.68689	0.451	0.463	0.568	0.454	0.448	0.451	1.64153	1.58765	0.706143	1.66687	1.99254	2.31138	0.495626	0.462258	-0.347938	0.510945	0.68941	0.837843	19.4534	18.1975	3.59985	20.0586	28.6625	38.5693	2.10014	2.06539	1.37744	2.11629	2.31381	2.49207
461	0.321616	0.319603	0.174185	0.32886	0.388048	0.452983	2.6898	0.451	0.463	0.568	0.454	0.448	0.451	1.6416	1.58904	0.70594	1.66748	1.99394	2.31212	0.495669	0.463131	-0.348225	0.511313	0.690114	0.838166	19.4973	18.2689	3.6056	20.117	28.7652	38.6779	2.10133	2.06742	1.37798	2.11783	2.31588	2.49382
460.5	0.321661	0.319787	0.174277	0.329016	0.38825	0.453062	2.69273	0.451	0.463	0.568	0.454	0.448	0.451	1.64183	1.58996	0.706313	1.66827	1.99498	2.31252	0.495809	0.463706	-0.347697	0.511787	0.690635	0.83834	19.5451	18.3297	3.61725	20.1798	28.8577	38.7755	2.10261	2.06913	1.3791	2.11948	2.31774	2.49539
460	0.321762	0.319852	0.174315	0.32952	0.388538	0.453068	2.69565	0.451	0.463	0.568	0.454	0.448	0.451	1.64234	1.59028	0.706467	1.67083	1.99646	2.31256	0.496123	0.46391	-0.347479	0.513318	0.691376	0.838353	19.5999	18.377	3.6267	20.2857	28.9634	38.8608	2.10409	2.07047	1.38	2.12225	2.31986	2.49677
459.5	0.321806	0.320034	0.174287	0.329629	0.388339	0.453272	2.69859	0.451	0.463	0.568	0.454	0.448	0.451	1.64257	1.59118	0.706353	1.67138	1.99544	2.3136	0.49626	0.464478	-0.34764	0.513649	0.690864	0.838803	19.648	18.438	3.63343	20.3433	28.9967	38.9805	2.10538	2.07218	1.38064	2.12376	2.32053	2.49869
459	0.321983	0.320152	0.174445	0.329849	0.388635	0.453409	2.70153	0.451	0.463	0.568	0.454	0.448	0.451	1.64347	1.59177	0.706994	1.67249	1.99696	2.3143	0.49681	0.464847	-0.346734	0.514316	0.691626	0.839106	19.7125	18.4918	3.64795	20.4149	29.1043	39.0891	2.1071	2.07369	1.38201	2.12563	2.32268	2.50043
458.5	0.321985	0.320359	0.174491	0.330032	0.388606	0.453446	2.70447	0.451	0.463	0.568	0.454	0.448	0.451	1.64348	1.5928	0.70718	1.67342	1.99681	2.31448	0.496816	0.465493	-0.34647	0.514871	0.691551	0.839187	19.7558	18.5561	3.65784	20.4822	29.1634	39.1808	2.10826	2.0755	1.38295	2.12737	2.32386	2.50189
458	0.322096	0.320613	0.174458	0.330238	0.388923	0.4536	2.70742	0.451	0.463	0.568	0.454	0.448	0.451	1.64405	1.59406	0.707046	1.67447	1.99844	2.31527	0.497161	0.466286	-0.346659	0.515495	0.692366	0.839527	19.8126	18.6262	3.66444	20.5525	29.2748	39.2931	2.10977	2.07745	1.38357	2.1292	2.32607	2.50368
457.5	0.322112	0.320711	0.174625	0.33036	0.388948	0.453526	2.71038	0.451	0.463	0.568	0.454	0.448	0.451	1.64413	1.59455	0.707723	1.67509	1.99857	2.31489	0.49721	0.466592	-0.345702	0.515864	0.692431	0.839364	19.8579	18.6783	3.67949	20.6127	29.3426	39.3662	2.11098	2.0789	1.38499	2.13076	2.32742	2.50484
457	0.322209	0.320936	0.174638	0.330527	0.388893	0.453664	2.71335	0.451	0.463	0.568	0.454	0.448	0.451	1.64462	1.59567	0.707776	1.67593	1.99829	2.3156	0.497511	0.467293	-0.345628	0.516369	0.692289	0.839668	19.9133	18.7455	3.6881	20.6787	29.3985	39.4764	2.11245	2.08077	1.3858	2.13246	2.32853	2.5066
456.5	0.322379	0.320987	0.1748	0.330814	0.388909	0.453975	2.71632	0.451	0.463	0.568	0.454	0.448	0.451	1.64549	1.59592	0.708432	1.67739	1.99837	2.31719	0.498039	0.467452	-0.344701	0.517237	0.69233	0.840353	19.978	18.7925	3.70304	20.7601	29.4654	39.6172	2.11416	2.08207	1.3872	2.13455	2.32985	2.50883
456	0.322381	0.321354	0.174866	0.330987	0.389282	0.453945	2.7193	0.451	0.463	0.568	0.454	0.448	0.451	1.6455	1.59775	0.7087	1.67826	2.00028	2.31703	0.498045	0.468595	-0.344323	0.51776	0.693289	0.840287	20.0221	18.8769	3.71397	20.8274	29.5867	39.6988	2.11533	2.08441	1.38822	2.13628	2.33225	2.51012
455.5	0.322567	0.321435	0.174897	0.330993	0.389261	0.454137	2.72228	0.451	0.463	0.568	0.454	0.448	0.451	1.64645	1.59815	0.708826	1.67829	2.00018	2.31801	0.498622	0.468847	-0.344146	0.517778	0.693235	0.84071	20.0893	18.9279	3.72345	20.8739	29.6485	39.8197	2.1171	2.08581	1.38911	2.13747	2.33346	2.51203
455	0.322652	0.322001	0.174998	0.331203	0.389466	0.454212	2.72527	0.451	0.463	0.568	0.454	0.448	0.451	1.64688	1.60096	0.709235	1.67936	2.00123	2.31839	0.498885	0.470606	-0.343569	0.518413	0.693762	0.840875	20.1441	19.0363	3.73595	20.9463	29.745	39.9204	2.11854	2.0888	1.39027	2.13933	2.33536	2.51362
454.5	0.322805	0.322099	0.17511	0.331495	0.389704	0.454194	2.72827	0.451	0.463	0.568	0.454	0.448	0.451	1.64767	1.60145	0.709689	1.68084	2.00245	2.3183	0.499359	0.47091	-0.342929	0.519294	0.694373	0.840835	20.2075	19.0899	3.74897	21.0295	29.8469	40.0052	2.12021	2.09026	1.39148	2.14145	2.33736	2.51495
454	0.322904	0.322207	0.175303	0.331811	0.389921	0.454399	2.73128	0.451	0.463	0.568	0.454	0.448	0.451	1.64817	1.60199	0.710471	1.68244	2.00357	2.31935	0.499666	0.471245	-0.341827	0.520247	0.694929	0.841287	20.2645	19.1448	3.76551	21.116	29.946	40.1295	2.1217	2.09176	1.39302	2.14365	2.33929	2.5169
453.5	0.323016	0.322468	0.175409	0.332123	0.390083	0.454633	2.73429	0.451	0.463	0.568	0.454	0.448	0.451	1.64874	1.60329	0.710901	1.68402	2.0044	2.32054	0.500013	0.472055	-0.341223	0.521186	0.695345	0.841801	20.3233	19.2181	3.77839	21.2024	30.0371	40.2595	2.12324	2.09376	1.3942	2.14584	2.34107	2.51894
453	0.323196	0.32292	0.17551	0.33221	0.390304	0.454779	2.73731	0.451	0.463	0.568	0.454	0.448	0.451	1.64966	1.60553	0.71131	1.68447	2.00554	2.32129	0.50057	0.473456	-0.340647	0.521448	0.695911	0.842123	20.3909	19.3146	3.79109	21.2604	30.1375	40.3743	2.125	2.09639	1.39538	2.1473	2.34302	2.52073
452.5	0.323265	0.323038	0.175636	0.332446	0.390647	0.45481	2.74033	0.451	0.463	0.568	0.454	0.448	0.451	1.65001	1.60612	0.711821	1.68566	2.0073	2.32145	0.500783	0.473821	-0.339929	0.522159	0.696789	0.842191	20.4447	19.3714	3.80494	21.3377	30.2573	40.4691	2.1264	2.09793	1.39665	2.14925	2.34535	2.52221
452	0.323412	0.32336	0.175823	0.332665	0.390983	0.455062	2.74336	0.451	0.463	0.568	0.454	0.448	0.451	1.65076	1.60772	0.712578	1.68677	2.00902	2.32273	0.501238	0.474818	-0.338865	0.522817	0.697649	0.842745	20.5086	19.4531	3.82148	21.4131	30.3764	40.6037	2.12806	2.10013	1.39816	2.15115	2.34765	2.5243
451.5	0.323527	0.323528	0.175993	0.332922	0.391142	0.455144	2.7464	0.451	0.463	0.568	0.454	0.448	0.451	1.65135	1.60856	0.713267	1.68808	2.00984	2.32315	0.501594	0.475337	-0.337899	0.523589	0.698056	0.842925	20.5687	19.5164	3.83736	21.4937	30.4685	40.7083	2.12962	2.10184	1.39961	2.15317	2.34943	2.52593
451	0.323717	0.323878	0.175863	0.333179	0.391409	0.455398	2.74945	0.451	0.463	0.568	0.454	0.448	0.451	1.65232	1.6103	0.712741	1.68938	2.01121	2.32445	0.502181	0.476418	-0.338638	0.524361	0.698738	0.843483	20.6385	19.6021	3.84019	21.5747	30.5778	40.8442	2.13142	2.10414	1.39987	2.15519	2.35154	2.52803
450.5	0.323757	0.324001	0.176034	0.333384	0.391624	0.45538	2.7525	0.451	0.463	0.568	0.454	0.448	0.451	1.65252	1.61091	0.713434	1.69042	2.01232	2.32436	0.502304	0.476798	-0.337666	0.524976	0.699287	0.843443	20.6895	19.6605	3.85621	21.6492	30.6794	40.9316	2.13274	2.10571	1.40133	2.15705	2.35349	2.52938
450	0.323275	0.322922	0.175358	0.332256	0.39047	0.45458	2.75556	0.451	0.463	0.568	0.454	0.448	0.451	1.65006	1.60554	0.710694	1.6847	2.00639	2.32027	0.500814	0.473462	-0.341514	0.521587	0.696336	0.841685	20.6738	19.5732	3.83516	21.5508	30.5667	40.8787	2.13233	2.10337	1.39941	2.1546	2.35132	2.52857
449.5	0.323314	0.323193	0.175624	0.332471	0.390509	0.454644	2.75862	0.451	0.463	0.568	0.454	0.448	0.451	1.65026	1.60689	0.711772	1.68579	2.00659	2.3206	0.500935	0.474301	-0.339998	0.522234	0.696436	0.841826	20.7248	19.6497	3.85537	21.6267	30.6408	40.9812	2.13365	2.10542	1.40125	2.15649	2.35275	2.53015
449	0.32343	0.323466	0.175518	0.332592	0.390812	0.455011	2.76169	0.451	0.463	0.568	0.454	0.448	0.451	1.65086	1.60825	0.711342	1.6864	2.00815	2.32247	0.501294	0.475145	-0.340602	0.522598	0.697212	0.842633	20.7859	19.7268	3.8593	21.6907	30.7568	41.1388	2.13522	2.10748	1.40161	2.15808	2.35497	2.53258
448.5	0.323489	0.323794	0.175706	0.332785	0.391015	0.455026	2.76477	0.451	0.463	0.568	0.454	0.448	0.451	1.65116	1.60988	0.712104	1.68738	2.00919	2.32255	0.501476	0.476159	-0.339531	0.523178	0.697731	0.842666	20.8399	19.8109	3.8762	21.7643	30.8574	41.2333	2.1366	2.10973	1.40314	2.15991	2.35689	2.53403
448	0.323554	0.323771	0.175931	0.333151	0.391017	0.455175	2.76786	0.451	0.463	0.568	0.454	0.448	0.451	1.65149	1.60976	0.713016	1.68924	2.0092	2.32331	0.501677	0.476088	-0.338251	0.524277	0.697736	0.842993	20.8948	19.8523	3.89481	21.8609	30.9267	41.3525	2.13801	2.11083	1.40482	2.16231	2.35821	2.53586
447.5	0.32377	0.324033	0.175974	0.333538	0.391372	0.455341	2.77095	0.451	0.463	0.568	0.454	0.448	0.451	1.65259	1.61107	0.71319	1.6912	2.01102	2.32416	0.502344	0.476897	-0.338007	0.525438	0.698644	0.843358	20.9695	19.929	3.90542	21.9607	31.0521	41.4752	2.13992	2.11286	1.40578	2.16477	2.3606	2.53774
447	0.323854	0.324325	0.176154	0.33374	0.39163	0.45559	2.77405	0.451	0.463	0.568	0.454	0.448	0.451	1.65302	1.61252	0.71392	1.69222	2.01235	2.32543	0.502604	0.477797	-0.336984	0.526043	0.699303	0.843904	21.0273	20.0096	3.92218	22.0366	31.1627	41.6135	2.14139	2.115	1.40728	2.16664	2.3627	2.53985
446.5	0.323994	0.324641	0.17621	0.33413	0.39186	0.455645	2.77716	0.451	0.463	0.568	0.454	0.448	0.451	1.65373	1.61409	0.714147	1.6942	2.01353	2.32571	0.503036	0.478771	-0.336667	0.527211	0.69989	0.844025	21.0927	20.0935	3.93347	22.1376	31.2692	41.7168	2.14305	2.11721	1.4083	2.16912	2.36472	2.54143
446	0.324086	0.324822	0.176537	0.334645	0.392318	0.45591	2.78027	0.451	0.463	0.568	0.454	0.448	0.451	1.6542	1.61499	0.715472	1.69681	2.01588	2.32706	0.50332	0.479329	-0.334813	0.528751	0.701058	0.844606	21.152	20.1611	3.95694	22.2557	31.4127	41.8591	2.14456	2.11899	1.41039	2.172	2.36742	2.54359
445.5	0.324233	0.325024	0.176661	0.33471	0.392624	0.456021	2.78339	0.451	0.463	0.568	0.454	0.448	0.451	1.65495	1.61599	0.715975	1.69714	2.01746	2.32763	0.503773	0.47995	-0.33411	0.528946	0.701837	0.84485	21.2188	20.2315	3.9714	22.3144	31.5323	41.9735	2.14625	2.12083	1.41168	2.17343	2.36968	2.54533
445	0.324385	0.325536	0.176931	0.335422	0.392834	0.456215	2.78652	0.451	0.463	0.568	0.454	0.448	0.451	1.65573	1.61854	0.717069	1.70075	2.01854	2.32862	0.504242	0.481524	-0.332583	0.531071	0.702372	0.845275	21.2864	20.3409	3.9925	22.4598	31.6371	42.1037	2.14796	2.1237	1.41355	2.17696	2.37164	2.5473
444.5	0.324471	0.325676	0.177012	0.335668	0.392952	0.45633	2.78965	0.451	0.463	0.568	0.454	0.448	0.451	1.65617	1.61924	0.717397	1.702	2.01914	2.32921	0.504507	0.481954	-0.332126	0.531804	0.702673	0.845527	21.3456	20.4042	4.00515	22.5434	31.7273	42.2197	2.14945	2.12535	1.41467	2.17899	2.37333	2.54905
444	0.324547	0.326046	0.177231	0.336118	0.393422	0.456781	2.79279	0.451	0.463	0.568	0.454	0.448	0.451	1.65656	1.62108	0.718285	1.70428	2.02156	2.33151	0.504741	0.48309	-0.330889	0.533143	0.703868	0.846515	21.4038	20.4967	4.02412	22.6548	31.8749	42.3986	2.15091	2.12775	1.41634	2.18167	2.37609	2.55175
443.5	0.324591	0.326238	0.177441	0.336564	0.393664	0.456898	2.79594	0.451	0.463	0.568	0.454	0.448	0.451	1.65678	1.62203	0.719136	1.70654	2.0228	2.3321	0.504877	0.483678	-0.329705	0.534469	0.704483	0.846771	21.4579	20.5671	4.04276	22.7662	31.9862	42.516	2.15227	2.12958	1.41798	2.18435	2.37816	2.55351
443	0.32477	0.326664	0.177774	0.337199	0.394116	0.457235	2.7991	0.451	0.463	0.568	0.454	0.448	0.451	1.6577	1.62415	0.720485	1.70976	2.02512	2.33382	0.505428	0.484983	-0.32783	0.536354	0.70563	0.847508	21.5301	20.6675	4.06711	22.9038	32.1321	42.6749	2.15408	2.13217	1.42011	2.18765	2.38086	2.5559
442.5	0.324808	0.326799	0.177898	0.337628	0.394317	0.457474	2.80226	0.451	0.463	0.568	0.454	0.448	0.451	1.65789	1.62482	0.720988	1.71194	2.02616	2.33504	0.505545	0.485397	-0.327133	0.537626	0.70614	0.848031	21.5838	20.7313	4.082	23.014	32.2376	42.8161	2.15542	2.13381	1.42141	2.19027	2.38282	2.55801
442	0.324907	0.327084	0.177992	0.338084	0.394647	0.457686	2.80543	0.451	0.463	0.568	0.454	0.448	0.451	1.65839	1.62624	0.721369	1.71425	2.02785	2.33613	0.50585	0.486268	-0.326605	0.538975	0.706977	0.848494	21.6458	20.8145	4.09556	23.1285	32.3647	42.9528	2.15697	2.13595	1.42259	2.19299	2.38516	2.56005
441.5	0.324929	0.327271	0.178161	0.338553	0.394787	0.45805	2.80861	0.451	0.463	0.568	0.454	0.448	0.451	1.65851	1.62717	0.722054	1.71663	2.02857	2.33798	0.505918	0.48684	-0.325655	0.540362	0.707331	0.849289	21.6978	20.8855	4.11264	23.2452	32.461	43.1187	2.15826	2.13777	1.42407	2.19575	2.38693	2.56251
441	0.324996	0.327431	0.178357	0.33894	0.395115	0.458344	2.81179	0.451	0.463	0.568	0.454	0.448	0.451	1.65885	1.62796	0.722848	1.71859	2.03026	2.33949	0.506124	0.487329	-0.324556	0.541504	0.708162	0.849931	21.756	20.9534	4.13105	23.3513	32.5888	43.272	2.15971	2.13951	1.42566	2.19825	2.38928	2.56479
440.5	0.325038	0.32768	0.1785	0.339284	0.395357	0.458354	2.81498	0.451	0.463	0.568	0.454	0.448	0.451	1.65906	1.6292	0.723428	1.72033	2.0315	2.33954	0.506253	0.488089	-0.323755	0.542519	0.708774	0.849953	21.8111	21.0329	4.14708	23.4519	32.7028	43.3722	2.16107	2.14153	1.42704	2.20062	2.39137	2.56627
440	0.325041	0.327921	0.178574	0.339621	0.395773	0.458625	2.81818	0.451	0.463	0.568	0.454	0.448	0.451	1.65908	1.6304	0.723728	1.72204	2.03364	2.34092	0.506262	0.488824	-0.32334	0.543511	0.709826	0.850544	21.8611	21.1118	4.15995	23.5519	32.8462	43.5222	2.16231	2.14354	1.42814	2.20296	2.39398	2.56849
439.5	0.325088	0.328151	0.178675	0.339736	0.395786	0.458622	2.82139	0.451	0.463	0.568	0.454	0.448	0.451	1.65932	1.63154	0.724137	1.72263	2.0337	2.3409	0.506407	0.489525	-0.322775	0.54385	0.709859	0.850537	21.9172	21.1895	4.17414	23.6215	32.9231	43.6207	2.1637	2.14551	1.42936	2.20459	2.39538	2.56994
439	0.32505	0.328228	0.178815	0.339867	0.395999	0.45905	2.8246	0.451	0.463	0.568	0.454	0.448	0.451	1.65912	1.63192	0.724704	1.72329	2.0348	2.34309	0.50629	0.48976	-0.321991	0.544235	0.710397	0.85147	21.962	21.2478	4.19021	23.6936	33.0337	43.8018	2.1648	2.14698	1.43073	2.20627	2.39739	2.5726
438.5	0.325205	0.328295	0.178777	0.340042	0.39602	0.458986	2.82782	0.451	0.463	0.568	0.454	0.448	0.451	1.65992	1.63226	0.72455	1.72418	2.03491	2.34276	0.506767	0.489964	-0.322204	0.54475	0.71045	0.851331	22.0331	21.305	4.19799	23.7721	33.1126	43.8895	2.16655	2.14843	1.4314	2.20809	2.39882	2.57389
438	0.32523	0.328345	0.179043	0.340485	0.395917	0.459202	2.83105	0.451	0.463	0.568	0.454	0.448	0.451	1.66004	1.63251	0.725628	1.72642	2.03438	2.34386	0.506844	0.490116	-0.320717	0.546052	0.71019	0.851801	22.0869	21.3602	4.22011	23.8886	33.171	44.0312	2.16787	2.14982	1.43328	2.21079	2.39988	2.57597
437.5	0.325278	0.328402	0.179014	0.340642	0.396118	0.459374	2.83429	0.451	0.463	0.568	0.454	0.448	0.451	1.66029	1.63279	0.725511	1.72722	2.03541	2.34474	0.506991	0.49029	-0.320879	0.546513	0.710697	0.852176	22.1439	21.4165	4.22839	23.9653	33.2806	44.1649	2.16927	2.15123	1.43398	2.21256	2.40186	2.57792
437	0.32529	0.328499	0.178998	0.340641	0.396094	0.45937	2.83753	0.451	0.463	0.568	0.454	0.448	0.451	1.66035	1.63327	0.725446	1.72721	2.03529	2.34472	0.507028	0.490585	-0.320968	0.54651	0.710637	0.852167	22.1962	21.4782	4.23732	24.02	33.3527	44.2653	2.17055	2.15278	1.43474	2.21383	2.40316	2.57938
436.5	0.325213	0.328547	0.178829	0.340898	0.39612	0.459391	2.84078	0.451	0.463	0.568	0.454	0.448	0.451	1.65996	1.63351	0.724761	1.72852	2.03542	2.34483	0.506791	0.490731	-0.321913	0.547264	0.710702	0.852213	22.2366	21.5337	4.23901	24.1114	33.4336	44.3708	2.17154	2.15417	1.43488	2.21593	2.40462	2.58092
436	0.325301	0.328458	0.178964	0.34102	0.396142	0.459646	2.84404	0.451	0.463	0.568	0.454	0.448	0.451	1.66041	1.63307	0.725308	1.72914	2.03553	2.34613	0.507062	0.49046	-0.321158	0.547622	0.710758	0.852768	22.2997	21.5714	4.25516	24.184	33.514	44.522	2.17307	2.15511	1.43625	2.2176	2.40606	2.58311
435.5	0.325403	0.328502	0.178967	0.341042	0.396148	0.459848	2.8473	0.451	0.463	0.568	0.454	0.448	0.451	1.66093	1.63329	0.72532	1.72925	2.03556	2.34716	0.507375	0.490594	-0.321142	0.547687	0.710773	0.853207	22.3649	21.6268	4.26508	24.2427	33.5921	44.6635	2.17466	2.15649	1.43708	2.21894	2.40746	2.58517
435	0.325456	0.328594	0.179057	0.341228	0.396148	0.459796	2.85057	0.451	0.463	0.568	0.454	0.448	0.451	1.6612	1.63374	0.725685	1.73019	2.03556	2.3469	0.507538	0.490874	-0.320639	0.548232	0.710773	0.853094	22.4237	21.6887	4.27919	24.325	33.6693	44.7562	2.17609	2.15803	1.43827	2.22082	2.40884	2.5865
434.5	0.325439	0.328809	0.17916	0.341234	0.396357	0.459935	2.85386	0.451	0.463	0.568	0.454	0.448	0.451	1.66111	1.63481	0.726103	1.73022	2.03664	2.34761	0.507486	0.491528	-0.320064	0.54825	0.7113	0.853396	22.473	21.7671	4.29398	24.3819	33.7825	44.8863	2.17728	2.15998	1.43951	2.22212	2.41086	2.58838
434	0.325562	0.32873	0.179082	0.341243	0.396424	0.460057	2.85714	0.451	0.463	0.568	0.454	0.448	0.451	1.66174	1.63442	0.725787	1.73027	2.03698	2.34823	0.507864	0.491288	-0.320499	0.548276	0.711469	0.853661	22.5418	21.8068	4.30013	24.4394	33.8718	45.0137	2.17895	2.16097	1.44003	2.22343	2.41246	2.59022
433.5	0.325582	0.328818	0.179133	0.34147	0.39656	0.459977	2.86044	0.451	0.463	0.568	0.454	0.448	0.451	1.66184	1.63486	0.725993	1.73142	2.03768	2.34782	0.507925	0.491556	-0.320215	0.548941	0.711812	0.853487	22.5966	21.8688	4.31251	24.5284	33.9733	45.1019	2.18027	2.1625	1.44106	2.22545	2.41426	2.59149
433	0.325632	0.328911	0.179328	0.341752	0.39657	0.460255	2.86374	0.451	0.463	0.568	0.454	0.448	0.451	1.6621	1.63532	0.726784	1.73285	2.03773	2.34924	0.508079	0.491838	-0.319127	0.549766	0.711838	0.854092	22.6558	21.9317	4.33189	24.6257	34.0535	45.2608	2.1817	2.16405	1.44268	2.22765	2.41569	2.59376
432.5	0.325623	0.328981	0.179216	0.341763	0.396552	0.46033	2.86705	0.451	0.463	0.568	0.454	0.448	0.451	1.66205	1.63567	0.72633	1.7329	2.03764	2.34962	0.508051	0.492051	-0.319751	0.549799	0.711792	0.854255	22.707	21.9918	4.33649	24.6843	34.1292	45.3803	2.18293	2.16554	1.44306	2.22897	2.41703	2.59547
432	0.325744	0.329081	0.179271	0.34209	0.396716	0.46019	2.87037	0.451	0.463	0.568	0.454	0.448	0.451	1.66267	1.63617	0.726553	1.73456	2.03848	2.34891	0.508423	0.492355	-0.319444	0.550755	0.712206	0.85395	22.7765	22.0562	4.34921	24.7888	34.2365	45.4577	2.1846	2.16712	1.44412	2.23133	2.41893	2.59658
431.5	0.325874	0.329243	0.179216	0.342002	0.396767	0.460489	2.8737	0.451	0.463	0.568	0.454	0.448	0.451	1.66333	1.63697	0.72633	1.73412	2.03874	2.35043	0.508822	0.492847	-0.319751	0.550498	0.712334	0.8546	22.8475	22.1291	4.35662	24.8335	34.3248	45.6224	2.1863	2.16891	1.44473	2.23234	2.42048	2.59893
431	0.325922	0.329192	0.179483	0.342088	0.396734	0.460787	2.87703	0.451	0.463	0.568	0.454	0.448	0.451	1.66358	1.63672	0.727412	1.73455	2.03858	2.35195	0.508969	0.492692	-0.318263	0.550749	0.712251	0.855247	22.9073	22.1736	4.37975	24.9037	34.3987	45.7875	2.18773	2.17	1.44665	2.23391	2.42178	2.60128
430.5	0.325996	0.329218	0.179524	0.342172	0.396858	0.460817	2.88037	0.451	0.463	0.568	0.454	0.448	0.451	1.66395	1.63685	0.727578	1.73498	2.03921	2.35211	0.509196	0.492771	-0.318034	0.550995	0.712564	0.855312	22.971	22.2286	4.39194	24.9738	34.5002	45.8999	2.18925	2.17134	1.44765	2.23548	2.42357	2.60287
430	0.326045	0.329425	0.179446	0.342382	0.396803	0.460909	2.88372	0.451	0.463	0.568	0.454	0.448	0.451	1.6642	1.63788	0.727262	1.73604	2.03893	2.35258	0.509346	0.4934	-0.318469	0.551608	0.712425	0.855512	23.0313	22.3084	4.39833	25.0627	34.5709	46.0251	2.19068	2.17329	1.44818	2.23747	2.42481	2.60465
429.5	0.326174	0.329495	0.179637	0.34238	0.39676	0.461092	2.88708	0.451	0.463	0.568	0.454	0.448	0.451	1.66486	1.63822	0.728036	1.73603	2.03871	2.35351	0.509742	0.493612	-0.317405	0.551602	0.712317	0.855909	23.1033	22.3699	4.41797	25.1208	34.644	46.1689	2.19239	2.17478	1.44979	2.23876	2.42609	2.60668
429	0.326281	0.329592	0.179855	0.342386	0.396949	0.461269	2.89044	0.451	0.463	0.568	0.454	0.448	0.451	1.66541	1.63871	0.728919	1.73606	2.03968	2.35442	0.51007	0.493907	-0.316192	0.55162	0.712793	0.856292	23.1723	22.4352	4.43903	25.1802	34.7578	46.3121	2.19403	2.17637	1.45152	2.24009	2.42808	2.6087
428.5	0.326475	0.32976	0.179699	0.34269	0.397081	0.461166	2.89382	0.451	0.463	0.568	0.454	0.448	0.451	1.6664	1.63954	0.728287	1.7376	2.04036	2.35389	0.510664	0.494416	-0.31706	0.552507	0.713125	0.856069	23.2541	22.5106	4.44168	25.2839	34.8622	46.3996	2.19596	2.17819	1.45173	2.24239	2.4299	2.60993
428	0.326616	0.32994	0.179867	0.343048	0.397372	0.461528	2.8972	0.451	0.463	0.568	0.454	0.448	0.451	1.66712	1.64044	0.728968	1.73942	2.04185	2.35574	0.511096	0.494962	-0.316125	0.553551	0.713858	0.856854	23.3286	22.5878	4.46039	25.396	34.9949	46.5811	2.19772	2.18006	1.45326	2.24487	2.43221	2.61248
427.5	0.326707	0.329909	0.180001	0.343207	0.397442	0.461559	2.90058	0.451	0.463	0.568	0.454	0.448	0.451	1.66758	1.64028	0.729511	1.74023	2.04221	2.3559	0.511375	0.494868	-0.315381	0.554015	0.714034	0.856921	23.3962	22.6364	4.47749	25.479	35.0892	46.6964	2.19931	2.18123	1.45465	2.2467	2.43385	2.61409
427	0.326901	0.330216	0.180083	0.343331	0.397652	0.461824	2.90398	0.451	0.463	0.568	0.454	0.448	0.451	1.66857	1.64181	0.729843	1.74085	2.04329	2.35725	0.511968	0.495798	-0.314925	0.554376	0.714562	0.857495	23.4789	22.7317	4.49208	25.5572	35.2086	46.8596	2.20125	2.18352	1.45583	2.24842	2.43592	2.61637
426.5	0.327067	0.330377	0.180377	0.343514	0.397834	0.461969	2.90739	0.451	0.463	0.568	0.454	0.448	0.451	1.66942	1.64261	0.731035	1.74178	2.04423	2.35799	0.512476	0.496286	-0.313294	0.554909	0.71502	0.857809	23.5579	22.8073	4.51733	25.6444	35.3235	46.999	2.2031	2.18534	1.45788	2.25034	2.4379	2.61832
426	0.327279	0.33067	0.18056	0.343872	0.398095	0.462192	2.9108	0.451	0.463	0.568	0.454	0.448	0.451	1.6705	1.64407	0.731777	1.7436	2.04557	2.35913	0.513124	0.497172	-0.31228	0.555951	0.715676	0.858291	23.6438	22.9014	4.53713	25.7583	35.4529	47.1549	2.20511	2.18759	1.45947	2.25283	2.44013	2.62048
425.5	0.327463	0.330909	0.180933	0.344072	0.398211	0.462434	2.91422	0.451	0.463	0.568	0.454	0.448	0.451	1.67144	1.64525	0.733288	1.74461	2.04616	2.36036	0.513686	0.497895	-0.310216	0.556532	0.715967	0.858815	23.7261	22.9885	4.56661	25.8489	35.557	47.3153	2.20702	2.18966	1.46184	2.25481	2.44192	2.62271
425	0.32768	0.331209	0.180964	0.344504	0.398791	0.462552	2.91765	0.451	0.463	0.568	0.454	0.448	0.451	1.67255	1.64675	0.733414	1.7468	2.04914	2.36096	0.514348	0.498801	-0.310045	0.557787	0.717423	0.85907	23.8135	23.0844	4.57893	25.9748	35.7446	47.4509	2.20905	2.19194	1.46282	2.25755	2.44513	2.62459
424.5	0.327669	0.331313	0.181137	0.344905	0.398972	0.462667	2.92108	0.451	0.463	0.568	0.454	0.448	0.451	1.67249	1.64726	0.734115	1.74884	2.05007	2.36155	0.514315	0.499115	-0.309089	0.55895	0.717876	0.859319	23.868	23.1533	4.5985	26.0967	35.8614	47.5864	2.21031	2.19358	1.46438	2.2602	2.44713	2.62646
424	0.327735	0.331356	0.18128	0.345069	0.399554	0.462963	2.92453	0.451	0.463	0.568	0.454	0.448	0.451	1.67283	1.64748	0.734695	1.74967	2.05307	2.36306	0.514516	0.499245	-0.3083	0.559426	0.719334	0.859958	23.934	23.214	4.61663	26.1832	36.051	47.7597	2.21184	2.19502	1.46582	2.26207	2.45036	2.62885
423.5	0.327764	0.331493	0.181388	0.345211	0.399467	0.46291	2.92798	0.451	0.463	0.568	0.454	0.448	0.451	1.67298	1.64816	0.735132	1.75039	2.05262	2.36279	0.514605	0.499658	-0.307705	0.559837	0.719116	0.859844	23.9948	23.2881	4.63306	26.2667	36.1204	47.8616	2.21324	2.19676	1.46712	2.26387	2.45154	2.63025
423	0.327791	0.331749	0.181544	0.345497	0.39965	0.463224	2.93144	0.451	0.463	0.568	0.454	0.448	0.451	1.67312	1.64943	0.735765	1.75184	2.05356	2.36439	0.514687	0.50043	-0.306845	0.560665	0.719574	0.860522	24.0555	23.3792	4.65201	26.3724	36.2391	48.0399	2.21464	2.19891	1.46862	2.26614	2.45355	2.6327
422.5	0.327801	0.331793	0.18139	0.345456	0.399879	0.463363	2.93491	0.451	0.463	0.568	0.454	0.448	0.451	1.67317	1.64965	0.73514	1.75163	2.05474	2.3651	0.514718	0.500563	-0.307694	0.560546	0.720147	0.860822	24.1139	23.4408	4.65512	26.4286	36.3665	48.1826	2.21599	2.20036	1.46887	2.26735	2.4557	2.63465
422	0.327824	0.331772	0.181516	0.345769	0.400011	0.46368	2.93839	0.451	0.463	0.568	0.454	0.448	0.451	1.67328	1.64954	0.735651	1.75322	2.05541	2.36672	0.514788	0.500499	-0.306999	0.561452	0.720477	0.861506	24.1745	23.4934	4.67264	26.5393	36.4768	48.3629	2.21738	2.20159	1.47025	2.26972	2.45756	2.63711
421.5	0.328002	0.331943	0.18159	0.346107	0.40028	0.463541	2.94187	0.451	0.463	0.568	0.454	0.448	0.451	1.67419	1.65039	0.735951	1.75493	2.0568	2.36601	0.515331	0.501015	-0.306592	0.562429	0.721149	0.861206	24.2582	23.5735	4.68755	26.6543	36.6126	48.4487	2.21929	2.20346	1.47142	2.27218	2.45984	2.63828
421	0.328028	0.332257	0.182024	0.346329	0.400436	0.463914	2.94537	0.451	0.463	0.568	0.454	0.448	0.451	1.67432	1.65196	0.73771	1.75606	2.0576	2.36792	0.51541	0.50196	-0.304205	0.56307	0.721539	0.86201	24.3197	23.6742	4.72118	26.752	36.7282	48.642	2.2207	2.20581	1.47405	2.27425	2.46178	2.64091
420.5	0.32805	0.332303	0.18199	0.346463	0.400463	0.464071	2.94887	0.451	0.463	0.568	0.454	0.448	0.451	1.67444	1.65218	0.737572	1.75674	2.05774	2.36872	0.515477	0.502098	-0.304391	0.563457	0.721606	0.862349	24.3809	23.7371	4.73065	26.8364	36.8206	48.7908	2.22209	2.20728	1.47479	2.27605	2.46333	2.64292
420	0.328056	0.332519	0.182121	0.346813	0.400777	0.464388	2.95238	0.451	0.463	0.568	0.454	0.448	0.451	1.67447	1.65326	0.738103	1.75851	2.05935	2.37034	0.515495	0.502748	-0.303672	0.564467	0.72239	0.863031	24.4398	23.8246	4.74874	26.9547	36.9662	48.9739	2.22344	2.20931	1.4762	2.27855	2.46576	2.6454
419.5	0.328113	0.332686	0.182183	0.34718	0.400859	0.464386	2.9559	0.451	0.463	0.568	0.454	0.448	0.451	1.67476	1.65409	0.738354	1.76037	2.05977	2.37032	0.515669	0.50325	-0.303331	0.565524	0.722595	0.863027	24.5066	23.9055	4.76331	27.0762	37.0696	49.0902	2.22495	2.21118	1.47733	2.28111	2.46748	2.64697
419	0.328159	0.332682	0.18219	0.347221	0.400997	0.46468	2.95943	0.451	0.463	0.568	0.454	0.448	0.451	1.67499	1.65407	0.738383	1.76058	2.06048	2.37183	0.515809	0.503238	-0.303293	0.565643	0.722939	0.86366	24.5721	23.962	4.77505	27.1473	37.1837	49.2698	2.22644	2.21249	1.47824	2.28261	2.46938	2.64939
418.5	0.328218	0.332689	0.182155	0.347394	0.401044	0.464698	2.96296	0.451	0.463	0.568	0.454	0.448	0.451	1.67529	1.6541	0.738241	1.76146	2.06072	2.37192	0.515989	0.503259	-0.303485	0.566141	0.723056	0.863699	24.6397	24.0203	4.78463	27.2393	37.2813	49.3914	2.22797	2.21383	1.47898	2.28454	2.471	2.65102
418	0.328339	0.332805	0.18232	0.347545	0.400896	0.46467	2.96651	0.451	0.463	0.568	0.454	0.448	0.451	1.67591	1.65468	0.73891	1.76222	2.05996	2.37177	0.516358	0.503608	-0.30258	0.566575	0.722687	0.863638	24.7169	24.0946	4.80478	27.3283	37.343	49.5037	2.22971	2.21554	1.48053	2.2864	2.47202	2.65252
417.5	0.328323	0.332791	0.182497	0.347512	0.401227	0.465042	2.97006	0.451	0.463	0.568	0.454	0.448	0.451	1.67583	1.65461	0.739627	1.76205	2.06166	2.37367	0.516309	0.503566	-0.301609	0.56648	0.723512	0.864439	24.7737	24.1503	4.82565	27.3885	37.4943	49.7018	2.23099	2.21682	1.48214	2.28766	2.47452	2.65517
417	0.328412	0.332703	0.182384	0.347691	0.401266	0.465143	2.97362	0.451	0.463	0.568	0.454	0.448	0.451	1.67628	1.65417	0.739169	1.76296	2.06186	2.37419	0.51658	0.503301	-0.302229	0.566995	0.72361	0.864656	24.8466	24.1954	4.83124	27.4826	37.5916	49.8427	2.23263	2.21786	1.48257	2.28962	2.47613	2.65705
416.5	0.328421	0.332725	0.182512	0.348019	0.401149	0.465216	2.97719	0.451	0.463	0.568	0.454	0.448	0.451	1.67633	1.65428	0.739688	1.76462	2.06126	2.37456	0.516607	0.503368	-0.301527	0.567938	0.723318	0.864813	24.9076	24.2568	4.84965	27.6006	37.6599	49.9782	2.234	2.21926	1.48398	2.29208	2.47725	2.65886
416	0.328613	0.332905	0.182515	0.348239	0.401362	0.465549	2.98077	0.451	0.463	0.568	0.454	0.448	0.451	1.67731	1.65518	0.7397	1.76574	2.06236	2.37626	0.517192	0.503908	-0.301511	0.56857	0.723849	0.865528	24.9968	24.3414	4.86147	27.702	37.7906	50.1701	2.236	2.22119	1.48488	2.29418	2.4794	2.66141
415.5	0.328697	0.332831	0.182622	0.348322	0.401303	0.465673	2.98436	0.451	0.463	0.568	0.454	0.448	0.451	1.67774	1.65481	0.740134	1.76616	2.06205	2.37689	0.517447	0.503686	-0.300925	0.568808	0.723702	0.865795	25.0698	24.3892	4.87889	27.7819	37.8705	50.3177	2.23763	2.22228	1.48621	2.29583	2.48071	2.66336
415	0.328718	0.332987	0.182713	0.348647	0.401516	0.465649	2.98795	0.451	0.463	0.568	0.454	0.448	0.451	1.67785	1.65559	0.740502	1.76781	2.06315	2.37677	0.517511	0.504155	-0.300426	0.569741	0.724232	0.865743	25.1334	24.4709	4.89553	27.9009	38.0021	50.4338	2.23905	2.22414	1.48748	2.29829	2.48286	2.6649
414.5	0.328879	0.33299	0.182595	0.3488	0.401398	0.465803	2.99156	0.451	0.463	0.568	0.454	0.448	0.451	1.67867	1.6556	0.740024	1.76859	2.06254	2.37756	0.518001	0.504164	-0.301073	0.57018	0.723939	0.866074	25.2188	24.5304	4.90101	27.9928	38.0714	50.589	2.24094	2.22549	1.48789	2.30018	2.48399	2.66695
414	0.328972	0.333101	0.182762	0.348933	0.401782	0.466056	2.99517	0.451	0.463	0.568	0.454	0.448	0.451	1.67914	1.65615	0.740701	1.76926	2.06451	2.37885	0.518284	0.504497	-0.300158	0.570561	0.724895	0.866617	25.294	24.6061	4.92185	28.0818	38.2365	50.7664	2.24261	2.22721	1.48947	2.30201	2.48668	2.66928
413.5	0.329074	0.333102	0.182726	0.349108	0.401671	0.466143	2.99879	0.451	0.463	0.568	0.454	0.448	0.451	1.67966	1.65616	0.740555	1.77015	2.06394	2.37929	0.518594	0.5045	-0.300355	0.571062	0.724618	0.866803	25.371	24.6658	4.93182	28.178	38.3079	50.9083	2.24432	2.22856	1.49022	2.30397	2.48784	2.67114
413	0.329093	0.333358	0.18295	0.349282	0.401819	0.466483	3.00242	0.451	0.463	0.568	0.454	0.448	0.451	1.67976	1.65743	0.741463	1.77103	2.0647	2.38103	0.518651	0.505268	-0.29913	0.571561	0.724987	0.867533	25.4354	24.7636	4.95589	28.2745	38.429	51.1061	2.24574	2.23076	1.49204	2.30594	2.4898	2.67373
412.5	0.329214	0.333333	0.183027	0.349304	0.401981	0.466642	3.00606	0.451	0.463	0.568	0.454	0.448	0.451	1.68038	1.65731	0.741775	1.77114	2.06554	2.38184	0.519019	0.505193	-0.298709	0.571624	0.72539	0.867873	25.5158	24.8199	4.9721	28.3466	38.5533	51.265	2.24751	2.23203	1.49326	2.30741	2.49181	2.67581
412	0.329409	0.33362	0.183191	0.349634	0.402382	0.466648	3.00971	0.451	0.463	0.568	0.454	0.448	0.451	1.68137	1.65873	0.74244	1.77281	2.0676	2.38187	0.519611	0.506054	-0.297814	0.572568	0.726387	0.867886	25.6081	24.9231	4.99311	28.4692	38.724	51.3908	2.24954	2.23435	1.49483	2.3099	2.49457	2.67745
411.5	0.329672	0.333804	0.183263	0.349874	0.402619	0.467036	3.01337	0.451	0.463	0.568	0.454	0.448	0.451	1.68272	1.65965	0.742731	1.77403	2.06881	2.38385	0.520409	0.506605	-0.297421	0.573254	0.726976	0.868717	25.7114	25.0113	5.00919	28.5776	38.8639	51.6015	2.25181	2.23632	1.49604	2.3121	2.49682	2.68019
411	0.329899	0.334137	0.183679	0.350342	0.402905	0.467346	3.01703	0.451	0.463	0.568	0.454	0.448	0.451	1.68387	1.6613	0.744417	1.7764	2.07028	2.38543	0.521098	0.507602	-0.295153	0.574591	0.727686	0.869381	25.8095	25.1222	5.0442	28.7239	39.0139	51.7958	2.25395	2.2388	1.49864	2.31505	2.49922	2.68271
410.5	0.330052	0.334207	0.183878	0.350377	0.403329	0.467648	3.02071	0.451	0.463	0.568	0.454	0.448	0.451	1.68466	1.66165	0.745224	1.77658	2.07246	2.38697	0.521561	0.507812	-0.294071	0.574691	0.728738	0.870027	25.8964	25.194	5.06746	28.7996	39.1914	51.9892	2.25585	2.24039	1.50037	2.31658	2.50206	2.68521
410	0.329319	0.332568	0.182443	0.350756	0.400781	0.466679	3.02439	0.451	0.463	0.568	0.454	0.448	0.451	1.68091	1.6535	0.739408	1.7785	2.05937	2.38203	0.519338	0.502896	-0.301905	0.575772	0.7224	0.867953	25.8444	25.0084	5.00085	28.9324	38.7922	51.9003	2.25472	2.23625	1.49541	2.31924	2.49566	2.68406
409.5	0.32949	0.332764	0.182485	0.350845	0.401103	0.466623	3.02808	0.451	0.463	0.568	0.454	0.448	0.451	1.68179	1.65448	0.739578	1.77895	2.06102	2.38174	0.519857	0.503485	-0.301675	0.576026	0.723203	0.867833	25.9345	25.099	5.01538	29.0178	38.9495	52.0146	2.25668	2.23828	1.4965	2.32095	2.49819	2.68554
409	0.329675	0.332818	0.182533	0.350926	0.401166	0.467045	3.03178	0.451	0.463	0.568	0.454	0.448	0.451	1.68273	1.65475	0.739773	1.77936	2.06135	2.3839	0.520418	0.503647	-0.301412	0.576256	0.72336	0.868737	26.0271	25.1686	5.0303	29.1023	39.0571	52.2362	2.25869	2.23983	1.49761	2.32264	2.49991	2.68839
408.5	0.329776	0.332764	0.182612	0.350991	0.401231	0.467111	3.0355	0.451	0.463	0.568	0.454	0.448	0.451	1.68325	1.65448	0.740093	1.77969	2.06168	2.38423	0.520725	0.503485	-0.300979	0.576442	0.723522	0.868878	26.1069	25.2221	5.04698	29.1844	39.1654	52.379	2.26042	2.24102	1.49885	2.32428	2.50165	2.69023
408	0.329763	0.333166	0.182812	0.351234	0.401571	0.467232	3.03922	0.451	0.463	0.568	0.454	0.448	0.451	1.68318	1.65648	0.740904	1.78093	2.06343	2.38485	0.520685	0.504692	-0.299885	0.577134	0.724369	0.869137	26.1688	25.345	5.07045	29.2965	39.328	52.5346	2.26176	2.24374	1.50059	2.3265	2.50424	2.69223
407.5	0.329956	0.333416	0.183019	0.351421	0.401662	0.467573	3.04294	0.451	0.463	0.568	0.454	0.448	0.451	1.68417	1.65772	0.741742	1.78187	2.0639	2.38659	0.52127	0.505442	-0.298753	0.577666	0.724596	0.869866	26.2638	25.4454	5.09442	29.3997	39.4425	52.7405	2.26381	2.24596	1.50236	2.32855	2.50606	2.69486
407	0.33009	0.333537	0.183196	0.351249	0.402052	0.467538	3.04668	0.451	0.463	0.568	0.454	0.448	0.451	1.68485	1.65832	0.74246	1.781	2.0659	2.38641	0.521676	0.505805	-0.297786	0.577176	0.725567	0.869792	26.3498	25.5265	5.11682	29.4431	39.6163	52.8623	2.26566	2.24775	1.50401	2.32941	2.50881	2.69641
406.5	0.330228	0.333751	0.18326	0.351375	0.402225	0.467619	3.05043	0.451	0.463	0.568	0.454	0.448	0.451	1.68555	1.65938	0.742719	1.78164	2.06679	2.38683	0.522094	0.506446	-0.297437	0.577535	0.725997	0.869965	26.4367	25.6222	5.133	29.5368	39.748	53.0108	2.26752	2.24985	1.5052	2.33126	2.5109	2.6983
406	0.330235	0.333794	0.183413	0.351631	0.402349	0.468088	3.05419	0.451	0.463	0.568	0.454	0.448	0.451	1.68559	1.6596	0.743339	1.78294	2.06743	2.38922	0.522115	0.506575	-0.296603	0.578263	0.726305	0.870967	26.503	25.6919	5.15425	29.6527	39.8705	53.2481	2.26894	2.25138	1.50675	2.33354	2.51283	2.70132
405.5	0.330333	0.334064	0.183618	0.351729	0.402455	0.468439	3.05795	0.451	0.463	0.568	0.454	0.448	0.451	1.68609	1.66094	0.74417	1.78344	2.06797	2.39101	0.522412	0.507384	-0.295486	0.578542	0.726568	0.871717	26.5842	25.797	5.17853	29.7425	39.99	53.4595	2.27068	2.25368	1.50852	2.33531	2.51471	2.704
405	0.330417	0.33422	0.183781	0.351748	0.402835	0.468593	3.06173	0.451	0.463	0.568	0.454	0.448	0.451	1.68652	1.66172	0.744831	1.78353	2.06992	2.3918	0.522666	0.507851	-0.294598	0.578596	0.727512	0.872046	26.6634	25.8849	5.20054	29.8192	40.1645	53.6269	2.27237	2.2556	1.51012	2.33681	2.51745	2.70611
404.5	0.330501	0.3344	0.18406	0.351914	0.402991	0.468355	3.06551	0.451	0.463	0.568	0.454	0.448	0.451	1.68695	1.66261	0.745961	1.78437	2.07073	2.39058	0.522921	0.508389	-0.293081	0.579068	0.727899	0.871538	26.743	25.9769	5.22925	29.9212	40.295	53.7049	2.27406	2.2576	1.5122	2.33881	2.51949	2.7071
404	0.330683	0.33448	0.18422	0.35211	0.403191	0.468639	3.06931	0.451	0.463	0.568	0.454	0.448	0.451	1.68788	1.66301	0.74661	1.78537	2.07175	2.39203	0.523471	0.508628	-0.292212	0.579625	0.728395	0.872144	26.8387	26.0537	5.25132	30.0287	40.4349	53.9033	2.2761	2.25927	1.51379	2.34091	2.52168	2.70959
403.5	0.330798	0.334712	0.184249	0.35203	0.403495	0.468913	3.07311	0.451	0.463	0.568	0.454	0.448	0.451	1.68846	1.66416	0.746727	1.78496	2.07332	2.39343	0.523819	0.509322	-0.292055	0.579398	0.729149	0.872728	26.924	26.1546	5.266	30.0895	40.5964	54.1001	2.2779	2.26145	1.51485	2.34209	2.52419	2.71206
403	0.330953	0.33485	0.184251	0.352236	0.403648	0.469418	3.07692	0.451	0.463	0.568	0.454	0.448	0.451	1.68925	1.66485	0.746736	1.78601	2.0741	2.39601	0.524287	0.509734	-0.292044	0.579983	0.729528	0.873805	27.0162	26.2411	5.27919	30.1995	40.728	54.3513	2.27985	2.26332	1.5158	2.34423	2.52623	2.7152
402.5	0.330983	0.334994	0.184607	0.352518	0.403688	0.469571	3.08075	0.451	0.463	0.568	0.454	0.448	0.451	1.68941	1.66556	0.748178	1.78744	2.07431	2.39679	0.524378	0.510164	-0.290114	0.580783	0.729627	0.87413	27.0882	26.329	5.31278	30.3231	40.8374	54.522	2.28137	2.26521	1.51821	2.34662	2.52793	2.71733
402	0.331187	0.335087	0.184697	0.352497	0.404041	0.46967	3.08458	0.451	0.463	0.568	0.454	0.448	0.451	1.69045	1.66603	0.748543	1.78733	2.07612	2.3973	0.524994	0.510441	-0.289626	0.580723	0.730501	0.874341	27.1891	26.4092	5.3312	30.3949	41.0107	54.6807	2.28349	2.26693	1.51952	2.34801	2.5306	2.71931
401.5	0.331222	0.335326	0.184942	0.352584	0.404268	0.469714	3.08842	0.451	0.463	0.568	0.454	0.448	0.451	1.69063	1.66721	0.749536	1.78777	2.07729	2.39752	0.5251	0.511154	-0.288301	0.58097	0.731063	0.874435	27.2627	26.5128	5.35867	30.4857	41.1591	54.8273	2.28503	2.26915	1.52147	2.34976	2.53289	2.72113
401	0.331361	0.335428	0.185096	0.352922	0.404448	0.469971	3.09227	0.451	0.463	0.568	0.454	0.448	0.451	1.69134	1.66772	0.75016	1.78949	2.07821	2.39883	0.525519	0.511459	-0.287468	0.581928	0.731508	0.874982	27.3536	26.5951	5.381	30.6204	41.2985	55.0243	2.28693	2.27091	1.52306	2.35235	2.53503	2.72357
400.5	0.331427	0.335527	0.185168	0.353054	0.404705	0.470332	3.09613	0.451	0.463	0.568	0.454	0.448	0.451	1.69167	1.66821	0.750452	1.79015	2.07953	2.40067	0.525719	0.511754	-0.28708	0.582302	0.732143	0.87575	27.4329	26.6773	5.39864	30.7199	41.4543	55.2465	2.28859	2.27267	1.5243	2.35426	2.53742	2.72632
400	0.331422	0.335709	0.185101	0.352918	0.404918	0.470745	3.1	0.451	0.463	0.568	0.454	0.448	0.451	1.69165	1.66912	0.75018	1.78947	2.08063	2.40278	0.525703	0.512296	-0.287441	0.581917	0.73267	0.876628	27.5007	26.7731	5.40823	30.773	41.6018	55.482	2.29	2.2747	1.52498	2.35528	2.53967	2.72922
399.5	0.331425	0.335824	0.185016	0.353066	0.404945	0.470802	3.10388	0.451	0.463	0.568	0.454	0.448	0.451	1.69166	1.66969	0.749836	1.79022	2.08077	2.40307	0.525713	0.512638	-0.287901	0.582336	0.732736	0.876749	27.5701	26.8585	5.41679	30.876	41.7116	55.6345	2.29145	2.27651	1.52558	2.35725	2.54135	2.73109
399	0.331502	0.33583	0.185085	0.353456	0.405107	0.471055	3.10777	0.451	0.463	0.568	0.454	0.448	0.451	1.69206	1.66972	0.750116	1.79219	2.0816	2.40436	0.525945	0.512656	-0.287528	0.58344	0.733136	0.877286	27.6521	26.9268	5.43443	31.0218	41.8496	55.834	2.29315	2.27796	1.52682	2.36003	2.54345	2.73353
398.5	0.331575	0.336046	0.185089	0.353093	0.405093	0.47106	3.11167	0.451	0.463	0.568	0.454	0.448	0.451	1.69243	1.67079	0.750132	1.79035	2.08153	2.40439	0.526165	0.513299	-0.287506	0.582413	0.733102	0.877296	27.7337	27.0292	5.44831	31.0359	41.9518	55.9753	2.29484	2.28012	1.5278	2.36029	2.545	2.73526
398	0.331709	0.335972	0.185251	0.35356	0.405194	0.471592	3.11558	0.451	0.463	0.568	0.454	0.448	0.451	1.69311	1.67043	0.750788	1.79272	2.08205	2.40711	0.526569	0.513079	-0.286631	0.583734	0.733351	0.878425	27.8259	27.0852	5.47157	31.1963	42.0783	56.2429	2.29674	2.2813	1.52942	2.36334	2.54692	2.73853
397.5	0.331879	0.33628	0.185442	0.353655	0.405442	0.471429	3.1195	0.451	0.463	0.568	0.454	0.448	0.451	1.69398	1.67196	0.751562	1.7932	2.08332	2.40627	0.527081	0.513995	-0.285601	0.584003	0.733963	0.878079	27.9246	27.2032	5.49667	31.2916	42.2358	56.3455	2.29878	2.28378	1.53117	2.36514	2.5493	2.73977
397	0.33195	0.336351	0.185649	0.353846	0.40586	0.471844	3.12343	0.451	0.463	0.568	0.454	0.448	0.451	1.69434	1.67231	0.752401	1.79417	2.08547	2.40839	0.527295	0.514207	-0.284485	0.584543	0.734993	0.878959	28.0069	27.2833	5.52283	31.4044	42.4297	56.587	2.30047	2.28546	1.53299	2.36727	2.55222	2.74271
396.5	0.332105	0.336537	0.185997	0.353978	0.405757	0.471971	3.12736	0.451	0.463	0.568	0.454	0.448	0.451	1.69513	1.67324	0.753812	1.79484	2.08494	2.40904	0.527762	0.514759	-0.282613	0.584916	0.73474	0.879229	28.1038	27.3824	5.55754	31.5071	42.5151	56.7604	2.30246	2.28754	1.5354	2.3692	2.5535	2.7448
396	0.332317	0.336763	0.186221	0.354502	0.405962	0.472228	3.13131	0.451	0.463	0.568	0.454	0.448	0.451	1.69622	1.67436	0.75472	1.7975	2.08599	2.41035	0.5284	0.515431	-0.281409	0.586395	0.735245	0.879773	28.2108	27.4885	5.58501	31.6803	42.6657	56.9658	2.30464	2.28975	1.53729	2.37245	2.55576	2.74728
395.5	0.332367	0.336527	0.186331	0.354751	0.406079	0.472568	3.13527	0.451	0.463	0.568	0.454	0.448	0.451	1.69647	1.67319	0.755165	1.79876	2.08659	2.41209	0.528551	0.51473	-0.280818	0.587097	0.735533	0.880493	28.2907	27.5194	5.60576	31.8051	42.7983	57.1922	2.30627	2.29039	1.53872	2.37478	2.55774	2.75001
395	0.332543	0.336922	0.186379	0.35484	0.40631	0.472884	3.13924	0.451	0.463	0.568	0.454	0.448	0.451	1.69737	1.67515	0.75536	1.79921	2.08778	2.4137	0.52908	0.515903	-0.280561	0.587348	0.736101	0.881161	28.3924	27.6539	5.62286	31.9017	42.9555	57.4138	2.30834	2.29319	1.53989	2.37658	2.56009	2.75267
394.5	0.332692	0.336965	0.186512	0.35489	0.406543	0.473103	3.14322	0.451	0.463	0.568	0.454	0.448	0.451	1.69813	1.67536	0.755899	1.79946	2.08898	2.41482	0.529528	0.51603	-0.279848	0.587489	0.736675	0.881624	28.4899	27.7311	5.64517	31.9916	43.1139	57.6127	2.31032	2.29478	1.54141	2.37826	2.56244	2.75505
394	0.332792	0.337023	0.186662	0.355092	0.406704	0.47337	3.14721	0.451	0.463	0.568	0.454	0.448	0.451	1.69864	1.67565	0.756507	1.80049	2.0898	2.41618	0.529829	0.516202	-0.279044	0.588058	0.737071	0.882188	28.5795	27.8111	5.66861	32.1094	43.2576	57.8242	2.31214	2.29644	1.54301	2.38044	2.56458	2.75758
393.5	0.332836	0.33714	0.186808	0.355286	0.40685	0.473428	3.15121	0.451	0.463	0.568	0.454	0.448	0.451	1.69887	1.67623	0.757099	1.80147	2.09056	2.41648	0.529961	0.51655	-0.278262	0.588604	0.73743	0.882311	28.6597	27.9012	5.69192	32.2262	43.3987	57.9855	2.31376	2.2983	1.5446	2.38261	2.56667	2.7595
393	0.333026	0.337728	0.187075	0.355188	0.407242	0.474017	3.15522	0.451	0.463	0.568	0.454	0.448	0.451	1.69984	1.67916	0.758181	1.80098	2.09257	2.41948	0.530532	0.518292	-0.276834	0.588328	0.738393	0.883554	28.7655	28.0699	5.72274	32.2904	43.5931	58.2779	2.31589	2.30176	1.54668	2.38379	2.56953	2.76297
392.5	0.333209	0.337518	0.187171	0.355578	0.407301	0.47403	3.15924	0.451	0.463	0.568	0.454	0.448	0.451	1.70077	1.67811	0.75857	1.80295	2.09287	2.41955	0.531081	0.51767	-0.27632	0.589426	0.738538	0.883582	28.8705	28.1065	5.74322	32.4439	43.7169	58.4296	2.318	2.30251	1.54806	2.38662	2.57136	2.76477
392	0.333369	0.337915	0.187415	0.355808	0.407721	0.474107	3.16327	0.451	0.463	0.568	0.454	0.448	0.451	1.70159	1.68009	0.759559	1.80412	2.09503	2.41994	0.531561	0.518846	-0.275018	0.590072	0.739568	0.883744	28.972	28.2446	5.7729	32.5688	43.919	58.5978	2.32004	2.30533	1.55006	2.38891	2.57432	2.76675
391.5	0.33343	0.33821	0.187518	0.356024	0.407848	0.474632	3.16731	0.451	0.463	0.568	0.454	0.448	0.451	1.7019	1.68155	0.759976	1.80521	2.09568	2.42262	0.531744	0.519718	-0.274468	0.590679	0.73988	0.884851	29.0567	28.3662	5.79402	32.6917	44.0586	58.8778	2.32173	2.30781	1.55148	2.39116	2.57637	2.77005
391	0.333551	0.338444	0.18785	0.356171	0.408102	0.475057	3.17136	0.451	0.463	0.568	0.454	0.448	0.451	1.70252	1.68272	0.761322	1.80596	2.09699	2.42479	0.532107	0.52041	-0.272699	0.591092	0.740502	0.885746	29.1522	28.4782	5.82943	32.8024	44.2264	59.1342	2.32364	2.31009	1.55384	2.39319	2.57882	2.77306
390.5	0.333683	0.338506	0.187977	0.356392	0.40835	0.475118	3.17542	0.451	0.463	0.568	0.454	0.448	0.451	1.70319	1.68303	0.761836	1.80708	2.09826	2.4251	0.532502	0.520593	-0.272023	0.591712	0.74111	0.885874	29.2501	28.5616	5.85227	32.9273	44.3937	59.301	2.32558	2.31178	1.55536	2.39546	2.58125	2.77502
390	0.333813	0.338509	0.188126	0.356579	0.408496	0.475443	3.17949	0.451	0.463	0.568	0.454	0.448	0.451	1.70385	1.68304	0.76244	1.80803	2.09901	2.42676	0.532892	0.520602	-0.271231	0.592237	0.741467	0.886558	29.348	28.6354	5.8766	33.0464	44.5394	59.5345	2.32753	2.31327	1.55697	2.39762	2.58337	2.77774
389.5	0.333869	0.338793	0.188166	0.356811	0.408549	0.475613	3.18357	0.451	0.463	0.568	0.454	0.448	0.451	1.70414	1.68445	0.762602	1.8092	2.09929	2.42763	0.53306	0.521441	-0.271019	0.592887	0.741597	0.886915	29.4332	28.7572	5.8942	33.1745	44.6654	59.7301	2.32921	2.31572	1.55814	2.39994	2.58519	2.78002
389	0.333903	0.3387	0.188273	0.357118	0.409041	0.476139	3.18766	0.451	0.463	0.568	0.454	0.448	0.451	1.70431	1.68399	0.763036	1.81076	2.10181	2.43031	0.533162	0.521166	-0.27045	0.593747	0.7428	0.888021	29.515	28.8153	5.91608	33.3171	44.8882	60.0163	2.33083	2.31689	1.55958	2.40252	2.58841	2.78335
388.5	0.334094	0.33887	0.188368	0.357411	0.409182	0.476268	3.19176	0.451	0.463	0.568	0.454	0.448	0.451	1.70529	1.68484	0.763421	1.81225	2.10254	2.43097	0.533733	0.521668	-0.269946	0.594567	0.743145	0.888292	29.6249	28.9185	5.93731	33.4577	45.0349	60.2035	2.333	2.31896	1.56098	2.40505	2.59052	2.78551
388	0.334268	0.33887	0.188787	0.357425	0.409107	0.477036	3.19588	0.451	0.463	0.568	0.454	0.448	0.451	1.70618	1.68484	0.765119	1.81232	2.10215	2.43489	0.534254	0.521668	-0.267724	0.594607	0.742962	0.889903	29.7322	28.9931	5.97913	33.5466	45.1345	60.5536	2.33511	2.32046	1.56372	2.40665	2.59195	2.78956
387.5	0.334418	0.339307	0.188672	0.357646	0.409511	0.47697	3.2	0.451	0.463	0.568	0.454	0.448	0.451	1.70694	1.68701	0.764653	1.81344	2.10423	2.43456	0.534703	0.522957	-0.268333	0.595225	0.743949	0.889765	29.8357	29.143	5.98727	33.6748	45.3404	60.6931	2.33714	2.32345	1.56425	2.40894	2.5949	2.79116
387	0.334551	0.339245	0.188871	0.357504	0.409576	0.477464	3.20413	0.451	0.463	0.568	0.454	0.448	0.451	1.70762	1.6867	0.76546	1.81272	2.10456	2.43708	0.5351	0.522774	-0.267279	0.594828	0.744108	0.8908	29.9367	29.2077	6.01542	33.7351	45.4721	60.9762	2.33911	2.32474	1.56609	2.41002	2.59679	2.79441
386.5	0.334629	0.33954	0.189034	0.357772	0.409876	0.477802	3.20828	0.451	0.463	0.568	0.454	0.448	0.451	1.70802	1.68817	0.76612	1.81408	2.1061	2.4388	0.535333	0.523643	-0.266416	0.595577	0.74484	0.891507	30.0282	29.3342	6.04141	33.8732	45.6566	61.2206	2.3409	2.32725	1.56778	2.41248	2.59942	2.79721
386	0.334811	0.339888	0.189155	0.358125	0.410337	0.478206	3.21244	0.451	0.463	0.568	0.454	0.448	0.451	1.70895	1.6899	0.766611	1.81587	2.10847	2.44087	0.535877	0.524667	-0.265776	0.596563	0.745964	0.892353	30.1388	29.4706	6.06483	34.028	45.878	61.4832	2.34305	2.32995	1.5693	2.41523	2.60256	2.8002
385.5	0.334915	0.340302	0.189562	0.358221	0.410352	0.478363	3.2166	0.451	0.463	0.568	0.454	0.448	0.451	1.70948	1.69196	0.76826	1.81635	2.10855	2.44167	0.536188	0.525885	-0.263627	0.596831	0.746	0.892681	30.2358	29.6191	6.10676	34.1347	46.0005	61.6833	2.34493	2.33288	1.572	2.41712	2.6043	2.80248
385	0.335148	0.340278	0.189743	0.358688	0.410818	0.478955	3.22078	0.451	0.463	0.568	0.454	0.448	0.451	1.71067	1.69184	0.768994	1.81872	2.11094	2.44469	0.536883	0.525814	-0.262673	0.598134	0.747135	0.893918	30.3566	29.6919	6.13433	34.3127	46.2248	61.9967	2.34727	2.33432	1.57377	2.42027	2.60747	2.80603
384.5	0.335242	0.340405	0.189874	0.358814	0.410899	0.47943	3.22497	0.451	0.463	0.568	0.454	0.448	0.451	1.71115	1.69247	0.769525	1.81936	2.11136	2.44711	0.537164	0.526187	-0.261982	0.598485	0.747333	0.894909	30.4526	29.7914	6.15879	34.4261	46.3634	62.2814	2.34913	2.33627	1.57534	2.42227	2.60942	2.80925
384	0.335373	0.340793	0.190129	0.359206	0.411254	0.479386	3.22917	0.451	0.463	0.568	0.454	0.448	0.451	1.71182	1.6944	0.770558	1.82135	2.11318	2.44689	0.537554	0.527327	-0.26064	0.599577	0.748196	0.894817	30.5559	29.9372	6.19144	34.5913	46.5646	62.4323	2.35111	2.33912	1.57742	2.42517	2.61225	2.81094
383.5	0.335466	0.340778	0.190096	0.359398	0.411405	0.479913	3.23338	0.451	0.463	0.568	0.454	0.448	0.451	1.71229	1.69432	0.770424	1.82232	2.11396	2.44958	0.537832	0.527282	-0.260814	0.600112	0.748563	0.895916	30.6526	30.0127	6.20544	34.7187	46.7204	62.7329	2.35297	2.34059	1.57831	2.4274	2.61443	2.81432
383	0.335571	0.340965	0.190315	0.359831	0.411489	0.480314	3.2376	0.451	0.463	0.568	0.454	0.448	0.451	1.71283	1.69525	0.771312	1.82452	2.11439	2.45162	0.538145	0.527831	-0.259663	0.601316	0.748767	0.896751	30.7519	30.1241	6.236	34.8933	46.8616	63.0019	2.35488	2.34276	1.58025	2.43044	2.6164	2.81733
382.5	0.335693	0.341095	0.190396	0.359783	0.411939	0.480425	3.24183	0.451	0.463	0.568	0.454	0.448	0.451	1.71345	1.6959	0.77164	1.82427	2.1167	2.45219	0.538508	0.528212	-0.259237	0.601182	0.74986	0.896982	30.8548	30.2259	6.25763	34.9752	47.087	63.1959	2.35684	2.34474	1.58162	2.43187	2.61954	2.8195
382	0.335733	0.341185	0.190668	0.36021	0.412078	0.481101	3.24607	0.451	0.463	0.568	0.454	0.448	0.451	1.71365	1.69635	0.772742	1.82644	2.11742	2.45564	0.538627	0.528476	-0.257809	0.602368	0.750198	0.898388	30.943	30.3211	6.29196	35.1501	47.2422	63.5399	2.35853	2.34658	1.58379	2.4349	2.6217	2.82333
381.5	0.335983	0.341269	0.190794	0.36035	0.412342	0.481376	3.25033	0.451	0.463	0.568	0.454	0.448	0.451	1.71493	1.69676	0.773253	1.82715	2.11878	2.45705	0.539372	0.528722	-0.257149	0.602757	0.750838	0.89896	31.0704	30.4156	6.31681	35.2697	47.4268	63.7794	2.36095	2.34841	1.58535	2.43697	2.62425	2.82599
381	0.336125	0.341472	0.190767	0.360538	0.412344	0.481671	3.25459	0.451	0.463	0.568	0.454	0.448	0.451	1.71565	1.69777	0.773144	1.8281	2.11879	2.45855	0.539794	0.529317	-0.25729	0.603278	0.750843	0.899572	31.1783	30.5318	6.33161	35.3993	47.5518	64.0254	2.363	2.35065	1.58627	2.43921	2.62598	2.82871
380.5	0.336375	0.341888	0.191075	0.360811	0.412753	0.482302	3.25887	0.451	0.463	0.568	0.454	0.448	0.451	1.71693	1.69984	0.774392	1.82949	2.12089	2.46177	0.540538	0.530534	-0.255677	0.604035	0.751834	0.900881	31.3068	30.6867	6.36877	35.5461	47.7715	64.362	2.36543	2.35363	1.5886	2.44173	2.62901	2.83242
380	0.336476	0.341985	0.191388	0.361099	0.412912	0.482708	3.26316	0.451	0.463	0.568	0.454	0.448	0.451	1.71745	1.70032	0.775661	1.83095	2.1217	2.46384	0.540838	0.530818	-0.25404	0.604833	0.75222	0.901723	31.4081	30.785	6.40648	35.6967	47.9342	64.6402	2.36734	2.35551	1.59094	2.44431	2.63125	2.83547
379.5	0.336552	0.342275	0.191502	0.361407	0.413466	0.483264	3.26746	0.451	0.463	0.568	0.454	0.448	0.451	1.71783	1.70176	0.776123	1.83251	2.12455	2.46668	0.541064	0.531666	-0.253445	0.605686	0.75356	0.902874	31.5052	30.9185	6.43103	35.8519	48.1897	64.96	2.36917	2.35806	1.59247	2.44697	2.63474	2.83897
379	0.336688	0.342723	0.1918	0.361667	0.413762	0.4836	3.27177	0.451	0.463	0.568	0.454	0.448	0.451	1.71853	1.70399	0.77733	1.83383	2.12607	2.4684	0.541468	0.532974	-0.25189	0.606405	0.754276	0.903569	31.6139	31.0814	6.46809	35.9983	48.3861	65.2221	2.37121	2.36116	1.59476	2.44946	2.63743	2.84183
378.5	0.336953	0.342885	0.192013	0.361899	0.41391	0.48387	3.27609	0.451	0.463	0.568	0.454	0.448	0.451	1.71988	1.7048	0.778194	1.835	2.12683	2.46978	0.542254	0.533446	-0.25078	0.607046	0.754634	0.904127	31.7474	31.193	6.4996	36.1398	48.5487	65.4676	2.37371	2.36328	1.59669	2.45186	2.63964	2.8445
378	0.337103	0.343089	0.192275	0.362236	0.41436	0.484756	3.28042	0.451	0.463	0.568	0.454	0.448	0.451	1.72065	1.70581	0.779255	1.83671	2.12914	2.4743	0.542699	0.534041	-0.249416	0.607977	0.75572	0.905957	31.8598	31.3128	6.53461	36.303	48.7832	65.8815	2.3758	2.36554	1.59884	2.45463	2.64282	2.84899
377.5	0.337122	0.343187	0.192504	0.362619	0.414562	0.485081	3.28477	0.451	0.463	0.568	0.454	0.448	0.451	1.72074	1.7063	0.780183	1.83865	2.13018	2.47596	0.542756	0.534327	-0.248226	0.609034	0.756208	0.906627	31.9478	31.4137	6.56754	36.4762	48.9602	66.1448	2.37744	2.36745	1.60085	2.45755	2.64521	2.85183
377	0.337294	0.343593	0.192672	0.362782	0.414752	0.485709	3.28912	0.451	0.463	0.568	0.454	0.448	0.451	1.72162	1.70832	0.780864	1.83948	2.13116	2.47916	0.543266	0.535509	-0.247354	0.609483	0.756666	0.907921	32.0653	31.5717	6.59647	36.6059	49.1351	66.4922	2.37963	2.37042	1.60261	2.45973	2.64757	2.85557
376.5	0.337317	0.343659	0.192693	0.363258	0.414858	0.48597	3.29349	0.451	0.463	0.568	0.454	0.448	0.451	1.72174	1.70865	0.780949	1.84189	2.1317	2.48049	0.543334	0.535701	-0.247245	0.610794	0.756921	0.908458	32.1549	31.6678	6.61545	36.7996	49.2909	66.7406	2.38129	2.37222	1.60376	2.46298	2.64967	2.85823
376	0.337634	0.343701	0.192744	0.363506	0.414747	0.486656	3.29787	0.451	0.463	0.568	0.454	0.448	0.451	1.72336	1.70885	0.781156	1.84315	2.13113	2.484	0.544273	0.535823	-0.24698	0.611477	0.756654	0.909868	32.3011	31.7598	6.63657	36.9479	49.3957	67.1072	2.38399	2.37394	1.60504	2.46546	2.65108	2.86215
375.5	0.337789	0.34388	0.192938	0.36373	0.415045	0.48698	3.30226	0.451	0.463	0.568	0.454	0.448	0.451	1.72415	1.70974	0.781942	1.84429	2.13266	2.48565	0.544732	0.536344	-0.245974	0.612093	0.757372	0.910534	32.4169	31.8776	6.66765	37.092	49.5985	67.3757	2.38612	2.37614	1.60692	2.46786	2.65379	2.86501
375	0.337982	0.34386	0.193176	0.363836	0.415357	0.487471	3.30667	0.451	0.463	0.568	0.454	0.448	0.451	1.72513	1.70965	0.782907	1.84482	2.13427	2.48816	0.545304	0.536286	-0.244741	0.612384	0.758123	0.911542	32.5406	31.959	6.70195	37.2127	49.8056	67.6918	2.3884	2.37765	1.60898	2.46986	2.65656	2.86836
374.5	0.338103	0.344117	0.193454	0.36419	0.415357	0.48803	3.31108	0.451	0.463	0.568	0.454	0.448	0.451	1.72575	1.71092	0.784034	1.84662	2.13427	2.49101	0.545662	0.537033	-0.243303	0.613357	0.758123	0.912688	32.6509	32.0923	6.73921	37.3848	49.9387	68.0284	2.39042	2.38013	1.61121	2.47271	2.65833	2.87192
374	0.338256	0.344359	0.193402	0.364697	0.415756	0.488684	3.31551	0.451	0.463	0.568	0.454	0.448	0.451	1.72653	1.71213	0.783823	1.84919	2.13632	2.49435	0.546114	0.537736	-0.243572	0.614748	0.759084	0.914027	32.7679	32.2234	6.75361	37.5892	50.1686	68.3934	2.39256	2.38255	1.61207	2.47609	2.66139	2.87577
373.5	0.338611	0.344464	0.193666	0.364928	0.415982	0.488888	3.31995	0.451	0.463	0.568	0.454	0.448	0.451	1.72834	1.71265	0.784893	1.85036	2.13748	2.49539	0.547163	0.538041	-0.242208	0.615381	0.759627	0.914444	32.9247	32.3295	6.79021	37.7377	50.3577	68.6339	2.39541	2.38451	1.61425	2.47853	2.66389	2.87829
373	0.33884	0.345076	0.19419	0.365471	0.416642	0.489591	3.3244	0.451	0.463	0.568	0.454	0.448	0.451	1.72951	1.71569	0.787017	1.85312	2.14087	2.49898	0.547839	0.539816	-0.239506	0.616868	0.761212	0.915881	33.0577	32.5315	6.84531	37.9516	50.6531	69.0161	2.39783	2.38823	1.61752	2.48203	2.66779	2.88229
372.5	0.339089	0.345455	0.194388	0.365712	0.417066	0.490224	3.32886	0.451	0.463	0.568	0.454	0.448	0.451	1.73078	1.71758	0.787819	1.85434	2.14305	2.50221	0.548574	0.540914	-0.238487	0.617527	0.76223	0.917173	33.1952	32.6906	6.87771	38.1038	50.8926	69.3805	2.40032	2.39114	1.61943	2.48452	2.67094	2.88609
372	0.339227	0.34604	0.194898	0.366001	0.417869	0.490867	3.33333	0.451	0.463	0.568	0.454	0.448	0.451	1.73149	1.72048	0.789886	1.8558	2.14718	2.50549	0.54898	0.542606	-0.235867	0.618317	0.764153	0.918484	33.3116	32.8896	6.93244	38.2667	51.2262	69.7498	2.40242	2.39477	1.62264	2.48717	2.6753	2.88992
371.5	0.339521	0.346173	0.19497	0.3666	0.418425	0.491707	3.33782	0.451	0.463	0.568	0.454	0.448	0.451	1.73299	1.72115	0.790178	1.85884	2.15003	2.50978	0.549847	0.54299	-0.235497	0.619952	0.765483	0.920194	33.4593	33.0036	6.95625	38.4955	51.501	70.1772	2.40508	2.39685	1.62403	2.49088	2.67888	2.89434
371	0.339595	0.346661	0.195552	0.366855	0.418852	0.492073	3.34232	0.451	0.463	0.568	0.454	0.448	0.451	1.73337	1.72357	0.792536	1.86013	2.15223	2.51165	0.550065	0.544399	-0.232517	0.620648	0.766503	0.920938	33.5642	33.1859	7.01672	38.653	51.7454	70.4713	2.40696	2.40015	1.62755	2.49342	2.68206	2.89736
370.5	0.339705	0.346689	0.195745	0.367163	0.419128	0.492793	3.34683	0.451	0.463	0.568	0.454	0.448	0.451	1.73393	1.72371	0.793319	1.86169	2.15364	2.51532	0.550389	0.544479	-0.23153	0.621487	0.767161	0.9224	33.6766	33.281	7.04956	38.8225	51.9535	70.8686	2.40897	2.40187	1.62945	2.49615	2.68475	2.90144
370	0.338703	0.343572	0.192451	0.368902	0.414745	0.493081	3.35135	0.451	0.463	0.568	0.454	0.448	0.451	1.72881	1.70821	0.779969	1.87051	2.13112	2.51679	0.547435	0.535448	-0.248502	0.626212	0.756649	0.922984	33.5688	32.7736	6.83273	39.2971	51.0102	71.1433	2.40704	2.39266	1.61677	2.50375	2.67248	2.90425
369.5	0.339054	0.343922	0.193153	0.369444	0.415382	0.493483	3.35589	0.451	0.463	0.568	0.454	0.448	0.451	1.7306	1.70995	0.782814	1.87326	2.1344	2.51884	0.54847	0.536466	-0.24486	0.62768	0.758184	0.923799	33.7295	32.9293	6.90131	39.5194	51.3056	71.4523	2.40992	2.3955	1.62081	2.50728	2.67634	2.9074
369	0.339211	0.344437	0.193663	0.369816	0.416019	0.494242	3.36043	0.451	0.463	0.568	0.454	0.448	0.451	1.73141	1.71251	0.784881	1.87515	2.13767	2.52272	0.548933	0.537962	-0.242224	0.628687	0.759716	0.925336	33.8523	33.1176	6.95661	39.7064	51.6026	71.8667	2.41211	2.39891	1.62405	2.51024	2.6802	2.9116
368.5	0.339483	0.344993	0.193926	0.36994	0.416245	0.494975	3.36499	0.451	0.463	0.568	0.454	0.448	0.451	1.73279	1.71528	0.785947	1.87578	2.13883	2.52646	0.549735	0.539575	-0.240866	0.629022	0.760259	0.926818	33.9987	33.3148	6.99446	39.841	51.799	72.2757	2.41471	2.40248	1.62625	2.51236	2.68275	2.91574
368	0.339706	0.345197	0.194005	0.370073	0.416773	0.495855	3.36957	0.451	0.463	0.568	0.454	0.448	0.451	1.73393	1.71629	0.786267	1.87645	2.14154	2.53095	0.550392	0.540167	-0.240459	0.629381	0.761527	0.928595	34.1359	33.4449	7.0192	39.978	52.0717	72.7302	2.41715	2.40482	1.62769	2.51452	2.68627	2.92031
367.5	0.339894	0.34559	0.194426	0.370713	0.417218	0.496536	3.37415	0.451	0.463	0.568	0.454	0.448	0.451	1.73489	1.71825	0.787973	1.87969	2.14383	2.53443	0.550945	0.541304	-0.238291	0.631109	0.762594	0.929967	34.2668	33.6124	7.06889	40.2257	52.325	73.1287	2.41946	2.40782	1.63056	2.51841	2.68954	2.9243
367	0.34027	0.346099	0.194828	0.370864	0.418049	0.497705	3.37875	0.451	0.463	0.568	0.454	0.448	0.451	1.73681	1.72078	0.789602	1.88046	2.1481	2.54039	0.55205	0.542776	-0.236226	0.631517	0.764584	0.932319	34.4363	33.8034	7.11751	40.3682	52.6769	73.6738	2.42245	2.41124	1.63336	2.52063	2.69405	2.92973
366.5	0.340403	0.346478	0.195261	0.371338	0.418426	0.498409	3.38336	0.451	0.463	0.568	0.454	0.448	0.451	1.73749	1.72266	0.791357	1.88286	2.15004	2.54399	0.552441	0.543871	-0.234006	0.632794	0.765485	0.933732	34.5573	33.97	7.1687	40.582	52.916	74.0841	2.42457	2.4142	1.63629	2.52396	2.6971	2.9338
366	0.340554	0.346736	0.19549	0.371507	0.418886	0.499165	3.38798	0.451	0.463	0.568	0.454	0.448	0.451	1.73826	1.72394	0.792285	1.88372	2.1524	2.54784	0.552885	0.544615	-0.232834	0.633249	0.766584	0.935248	34.6825	34.1136	7.20517	40.73	53.1774	74.5121	2.42676	2.41675	1.63837	2.52626	2.70042	2.93803
365.5	0.340747	0.346964	0.195813	0.371633	0.418949	0.500421	3.39261	0.451	0.463	0.568	0.454	0.448	0.451	1.73925	1.72508	0.793594	1.88436	2.15272	2.55426	0.553451	0.545272	-0.231183	0.633588	0.766734	0.937761	34.8169	34.252	7.24879	40.8692	53.3391	75.0926	2.42911	2.4192	1.64084	2.52842	2.70247	2.94374
365	0.341025	0.34735	0.196188	0.372164	0.419754	0.501133	3.39726	0.451	0.463	0.568	0.454	0.448	0.451	1.74066	1.727	0.795114	1.88705	2.15686	2.55789	0.554267	0.546384	-0.22927	0.635016	0.768654	0.939183	34.9694	34.4224	7.29653	41.0984	53.6911	75.5129	2.43177	2.4222	1.64354	2.53196	2.70692	2.94785
364.5	0.341239	0.347311	0.196409	0.372493	0.420036	0.502168	3.40192	0.451	0.463	0.568	0.454	0.448	0.451	1.74176	1.7268	0.79601	1.88872	2.15831	2.56317	0.554894	0.546272	-0.228144	0.635899	0.769325	0.941246	35.1094	34.5091	7.33306	41.2842	53.9108	76.0333	2.4342	2.42373	1.64559	2.53481	2.70969	2.95292
364	0.341458	0.348101	0.196978	0.372818	0.420398	0.503181	3.40659	0.451	0.463	0.568	0.454	0.448	0.451	1.74287	1.73073	0.798316	1.89037	2.16017	2.56834	0.555536	0.548544	-0.225251	0.636771	0.770187	0.943261	35.2511	34.7616	7.39588	41.4699	54.1522	76.5503	2.43665	2.42815	1.6491	2.53766	2.71271	2.95792
363.5	0.341664	0.348078	0.197367	0.373264	0.421014	0.504	3.41128	0.451	0.463	0.568	0.454	0.448	0.451	1.74393	1.73062	0.799892	1.89263	2.16334	2.57252	0.556139	0.548478	-0.223278	0.637967	0.771651	0.944887	35.3908	34.8527	7.44556	41.6836	54.4606	77.0111	2.43906	2.42974	1.65186	2.54092	2.71657	2.96236
363	0.341856	0.348615	0.197616	0.373441	0.421725	0.505271	3.41598	0.451	0.463	0.568	0.454	0.448	0.451	1.74491	1.73329	0.800901	1.89353	2.16699	2.57901	0.556701	0.550019	-0.222017	0.638441	0.773339	0.947406	35.5283	35.0567	7.48494	41.8382	54.7953	77.6133	2.44143	2.43328	1.65404	2.54327	2.72073	2.96814
362.5	0.342034	0.3488	0.198157	0.374026	0.421982	0.505748	3.42069	0.451	0.463	0.568	0.454	0.448	0.451	1.74581	1.73421	0.803094	1.89649	2.16831	2.58145	0.557221	0.55055	-0.219283	0.640006	0.773948	0.948349	35.6635	35.1908	7.54675	42.0852	55.0136	77.9746	2.44374	2.43561	1.65745	2.54702	2.72344	2.97159
362	0.342329	0.349222	0.198254	0.374182	0.422547	0.507608	3.42541	0.451	0.463	0.568	0.454	0.448	0.451	1.74732	1.7363	0.803487	1.89728	2.17121	2.59094	0.558083	0.551759	-0.218794	0.640423	0.775286	0.95202	35.8238	35.3735	7.57503	42.2368	55.3135	78.7663	2.44649	2.43876	1.659	2.54931	2.72714	2.9791
361.5	0.342542	0.349826	0.198533	0.374731	0.423046	0.508373	3.43015	0.451	0.463	0.568	0.454	0.448	0.451	1.74841	1.73931	0.804618	1.90007	2.17378	2.59484	0.558705	0.553487	-0.217388	0.64189	0.776466	0.953526	35.9676	35.5942	7.61739	42.4781	55.5977	79.2226	2.44894	2.44256	1.66131	2.55294	2.73064	2.98341
361	0.342673	0.350039	0.199198	0.374782	0.423433	0.50948	3.4349	0.451	0.463	0.568	0.454	0.448	0.451	1.74908	1.74037	0.807313	1.90033	2.17577	2.60049	0.559088	0.554096	-0.214044	0.642026	0.77738	0.955702	36.0949	35.7364	7.68976	42.6074	55.8538	79.7886	2.4511	2.44499	1.66525	2.55488	2.73378	2.98872
360.5	0.342965	0.350128	0.19932	0.375333	0.423885	0.51042	3.43967	0.451	0.463	0.568	0.454	0.448	0.451	1.75057	1.74081	0.807807	1.90312	2.17809	2.60529	0.559939	0.55435	-0.213432	0.643495	0.778447	0.957545	36.2568	35.8538	7.72056	42.8514	56.1285	80.3056	2.45385	2.447	1.66691	2.55853	2.73713	2.99355
360	0.343211	0.35046	0.19968	0.37563	0.424138	0.512043	3.44444	0.451	0.463	0.568	0.454	0.448	0.451	1.75182	1.74246	0.809266	1.90463	2.17939	2.61358	0.560656	0.555298	-0.211627	0.644286	0.779044	0.96072	36.4098	36.0217	7.77001	43.0386	56.3517	81.0417	2.45643	2.44986	1.66957	2.56132	2.73985	3.00039
359.5	0.34346	0.350647	0.199821	0.37561	0.424762	0.512856	3.44924	0.451	0.463	0.568	0.454	0.448	0.451	1.75309	1.74339	0.809838	1.90452	2.18259	2.61773	0.561382	0.555831	-0.210921	0.644232	0.780514	0.962306	36.5641	36.1605	7.80264	43.1538	56.675	81.5256	2.45903	2.45222	1.67132	2.56304	2.74377	3.00485
359	0.343813	0.351167	0.200585	0.376219	0.42522	0.514505	3.45404	0.451	0.463	0.568	0.454	0.448	0.451	1.75489	1.74598	0.812934	1.90761	2.18495	2.62614	0.562409	0.557313	-0.207105	0.645853	0.781592	0.965516	36.7415	36.3689	7.88434	43.4145	56.9556	82.2794	2.46201	2.45574	1.67568	2.5669	2.74716	3.01178
358.5	0.343893	0.351309	0.20081	0.376588	0.425564	0.515427	3.45886	0.451	0.463	0.568	0.454	0.448	0.451	1.7553	1.74668	0.813846	1.90948	2.18672	2.63085	0.562642	0.557717	-0.205984	0.646833	0.7824	0.967307	36.8612	36.4999	7.9241	43.6211	57.207	82.8051	2.46401	2.45795	1.67779	2.56995	2.75019	3.01658
358	0.34417	0.351703	0.201137	0.376855	0.425866	0.517007	3.46369	0.451	0.463	0.568	0.454	0.448	0.451	1.75672	1.74864	0.815171	1.91084	2.18827	2.63891	0.563447	0.558838	-0.204357	0.647542	0.78311	0.970367	37.0238	36.6841	7.97215	43.8051	57.4484	83.5464	2.46672	2.46104	1.68033	2.57265	2.75308	3.0233
357.5	0.3444	0.352183	0.201566	0.377026	0.426285	0.517865	3.46853	0.451	0.463	0.568	0.454	0.448	0.451	1.75789	1.75103	0.81691	1.9117	2.19042	2.64329	0.564115	0.560202	-0.202226	0.647995	0.784093	0.972026	37.1771	36.8873	8.0286	43.9676	57.7226	84.0586	2.46927	2.46445	1.68329	2.57504	2.75636	3.02793
357	0.344528	0.352344	0.201764	0.377514	0.426525	0.519716	3.47339	0.451	0.463	0.568	0.454	0.448	0.451	1.75854	1.75183	0.817713	1.91418	2.19165	2.65274	0.564486	0.560659	-0.201244	0.649289	0.784656	0.975593	37.309	37.0245	8.06693	44.2051	57.9496	84.8978	2.47146	2.46673	1.6853	2.57851	2.75907	3.03546
356.5	0.344752	0.352446	0.202241	0.378027	0.427459	0.520872	3.47826	0.451	0.463	0.568	0.454	0.448	0.451	1.75969	1.75233	0.819646	1.91678	2.19645	2.65864	0.565136	0.560949	-0.198883	0.650647	0.786843	0.977815	37.4624	37.1499	8.12787	44.4497	58.3671	85.5153	2.474	2.46882	1.68847	2.58207	2.76402	3.04096
356	0.344968	0.353059	0.202566	0.378546	0.42788	0.522595	3.48315	0.451	0.463	0.568	0.454	0.448	0.451	1.76079	1.75538	0.820963	1.91941	2.19862	2.66744	0.565763	0.562686	-0.197277	0.652019	0.787828	0.981118	37.6148	37.3841	8.17693	44.6971	58.6465	86.324	2.47651	2.4727	1.69102	2.58565	2.76733	3.04813
355.5	0.345263	0.353009	0.202883	0.378466	0.428157	0.523735	3.48805	0.451	0.463	0.568	0.454	0.448	0.451	1.7623	1.75513	0.822248	1.91901	2.20004	2.67325	0.566617	0.562545	-0.195714	0.651807	0.788475	0.983297	37.7852	37.4787	8.22564	44.804	58.8877	86.9451	2.47931	2.47426	1.69353	2.5872	2.77017	3.05359
355	0.345455	0.353681	0.203507	0.379047	0.428919	0.525888	3.49296	0.451	0.463	0.568	0.454	0.448	0.451	1.76328	1.75847	0.824777	1.92195	2.20395	2.68424	0.567173	0.564447	-0.192643	0.653341	0.790253	0.987399	37.9339	37.7276	8.29964	45.0684	59.2641	87.9085	2.48174	2.47836	1.69732	2.591	2.77458	3.06202
354.5	0.345734	0.353504	0.203637	0.379262	0.428818	0.526905	3.49788	0.451	0.463	0.568	0.454	0.448	0.451	1.7647	1.75759	0.825303	1.92304	2.20344	2.68944	0.567981	0.563946	-0.192004	0.653908	0.790018	0.989331	38.1024	37.7962	8.33371	45.2469	59.4034	88.4979	2.4845	2.47949	1.69906	2.59356	2.77621	3.06714
354	0.345969	0.354139	0.204233	0.379937	0.429718	0.529212	3.50282	0.451	0.463	0.568	0.454	0.448	0.451	1.7659	1.76075	0.827719	1.92646	2.20806	2.70121	0.56866	0.565741	-0.189082	0.655687	0.792114	0.9937	38.2621	38.0393	8.40626	45.5364	59.8217	89.5269	2.48709	2.48347	1.70275	2.5977	2.78109	3.07601
353.5	0.346266	0.353837	0.204446	0.38011	0.429894	0.530357	3.50778	0.451	0.463	0.568	0.454	0.448	0.451	1.76742	1.75925	0.828582	1.92734	2.20896	2.70706	0.569518	0.564888	-0.188039	0.656142	0.792524	0.995861	38.4363	38.082	8.44765	45.7069	60.0402	90.1693	2.48992	2.48416	1.70484	2.60013	2.78362	3.08152
353	0.346564	0.354325	0.205119	0.380571	0.430473	0.532494	3.51275	0.451	0.463	0.568	0.454	0.448	0.451	1.76894	1.76168	0.83131	1.92968	2.21194	2.71796	0.570378	0.566266	-0.184753	0.657354	0.79387	0.999883	38.6117	38.2954	8.52746	45.9478	60.3727	91.1551	2.49276	2.48763	1.70885	2.60355	2.78747	3.08991
352.5	0.346772	0.354479	0.20545	0.38084	0.431004	0.533943	3.51773	0.451	0.463	0.568	0.454	0.448	0.451	1.77	1.76244	0.832651	1.93104	2.21467	2.72536	0.570978	0.5667	-0.18314	0.65806	0.795102	1.0026	38.7678	38.4375	8.57929	46.1434	60.6935	91.9121	2.49527	2.48994	1.71144	2.60632	2.79117	3.0963
352	0.346965	0.355116	0.205982	0.381094	0.431352	0.536619	3.52273	0.451	0.463	0.568	0.454	0.448	0.451	1.77098	1.76561	0.834807	1.93233	2.21646	2.73902	0.571535	0.568496	-0.180554	0.658727	0.79591	1.0076	38.9213	38.6854	8.6483	46.3363	60.9644	93.0996	2.49774	2.49394	1.71488	2.60904	2.79427	3.10625
351.5	0.347218	0.355281	0.2061	0.381327	0.432181	0.538002	3.52774	0.451	0.463	0.568	0.454	0.448	0.451	1.77227	1.76643	0.835286	1.93351	2.22072	2.74608	0.572264	0.56896	-0.179982	0.659338	0.79783	1.01017	39.089	38.8316	8.68286	46.525	61.3732	93.8465	2.50042	2.4963	1.71659	2.61169	2.79895	3.11247
351	0.347676	0.355598	0.206862	0.381946	0.432314	0.540105	3.53276	0.451	0.463	0.568	0.454	0.448	0.451	1.77461	1.76801	0.838374	1.93665	2.2214	2.75681	0.573582	0.569852	-0.176291	0.66096	0.798137	1.01407	39.3039	39.0118	8.77212	46.8093	61.586	94.8513	2.50385	2.49919	1.72098	2.61567	2.80137	3.12076
350.5	0.347877	0.355664	0.207278	0.382294	0.432884	0.54189	3.5378	0.451	0.463	0.568	0.454	0.448	0.451	1.77564	1.76833	0.84006	1.93842	2.22433	2.76592	0.57416	0.570038	-0.174282	0.661871	0.799455	1.01737	39.4617	39.1377	8.83258	47.0285	61.9249	95.7518	2.50636	2.5012	1.72394	2.61873	2.80522	3.12814
350	0.348119	0.355959	0.207739	0.382825	0.433179	0.54422	3.54286	0.451	0.463	0.568	0.454	0.448	0.451	1.77687	1.7698	0.841928	1.94111	2.22584	2.77781	0.574855	0.570867	-0.172061	0.663259	0.800136	1.02166	39.6297	39.3148	8.89728	47.2941	62.1866	96.8532	2.50903	2.50403	1.72709	2.62242	2.80818	3.1371
349.5	0.348397	0.356183	0.208099	0.382857	0.433565	0.545826	3.54793	0.451	0.463	0.568	0.454	0.448	0.451	1.77829	1.77091	0.843387	1.94127	2.22783	2.78601	0.575654	0.571496	-0.170329	0.663343	0.801027	1.02461	39.8066	39.477	8.95371	47.4374	62.4758	97.7046	2.51182	2.50661	1.72982	2.6244	2.81143	3.14397
349	0.348638	0.356765	0.208797	0.38355	0.433978	0.548545	3.55301	0.451	0.463	0.568	0.454	0.448	0.451	1.77952	1.77381	0.846216	1.94478	2.22995	2.79989	0.576345	0.573129	-0.166981	0.665151	0.801979	1.02958	39.976	39.7197	9.03972	47.7458	62.7744	98.9634	2.51449	2.51045	1.73396	2.62866	2.81479	3.15405
348.5	0.348962	0.356822	0.209202	0.383455	0.434636	0.550499	3.55811	0.451	0.463	0.568	0.454	0.448	0.451	1.78118	1.77409	0.847857	1.9443	2.23333	2.80986	0.577274	0.573288	-0.165043	0.664903	0.803494	1.03314	40.1654	39.8465	9.10088	47.8592	63.1457	99.9559	2.51746	2.51245	1.73688	2.63022	2.81894	3.16193
348	0.349325	0.357159	0.209835	0.384181	0.435292	0.553406	3.56322	0.451	0.463	0.568	0.454	0.448	0.451	1.78303	1.77577	0.850423	1.94798	2.2367	2.8247	0.578314	0.574232	-0.162022	0.666795	0.805002	1.0384	40.3647	40.0366	9.18237	48.1788	63.5186	101.305	2.52058	2.51544	1.74076	2.6346	2.82309	3.17254
347.5	0.349705	0.357112	0.210199	0.384428	0.435809	0.555198	3.56835	0.451	0.463	0.568	0.454	0.448	0.451	1.78497	1.77553	0.851898	1.94924	2.23936	2.83385	0.579401	0.574101	-0.160288	0.667438	0.806189	1.04164	40.5691	40.1413	9.24079	48.3796	63.8529	102.256	2.52376	2.51708	1.74352	2.63734	2.8268	3.17996
347	0.349889	0.357664	0.21088	0.384962	0.436319	0.558043	3.57349	0.451	0.463	0.568	0.454	0.448	0.451	1.78591	1.77828	0.854658	1.95194	2.24198	2.84837	0.579927	0.575645	-0.157054	0.668826	0.807359	1.04675	40.7289	40.3816	9.32758	48.6541	64.187	103.604	2.52625	2.52084	1.7476	2.64107	2.83049	3.19039
346.5	0.350082	0.35796	0.21122	0.38506	0.436766	0.560076	3.57864	0.451	0.463	0.568	0.454	0.448	0.451	1.78689	1.77975	0.856036	1.95244	2.24428	2.85875	0.580478	0.576473	-0.155443	0.66908	0.808383	1.05038	40.8916	40.5653	9.38471	48.8194	64.5044	104.662	2.52877	2.52371	1.75027	2.64331	2.83398	3.19851
346	0.350422	0.358012	0.211915	0.385852	0.437768	0.563618	3.58382	0.451	0.463	0.568	0.454	0.448	0.451	1.78863	1.78001	0.858853	1.95646	2.24942	2.87683	0.581449	0.576618	-0.152158	0.671135	0.810674	1.05669	41.0896	40.6944	9.47389	49.1622	64.9881	106.296	2.53182	2.52571	1.75441	2.64794	2.83928	3.21092
345.5	0.350704	0.35806	0.212207	0.385939	0.438225	0.565896	3.589	0.451	0.463	0.568	0.454	0.448	0.451	1.79007	1.78025	0.860036	1.9569	2.25177	2.88845	0.582254	0.576752	-0.150781	0.67136	0.811718	1.06072	41.2749	40.8232	9.52754	49.3269	65.3125	107.468	2.53467	2.52771	1.75689	2.65015	2.84282	3.21973
345	0.351057	0.35827	0.212809	0.386507	0.438949	0.569184	3.5942	0.451	0.463	0.568	0.454	0.448	0.451	1.79187	1.78129	0.862476	1.95978	2.25549	2.90524	0.58326	0.577338	-0.147948	0.672831	0.813368	1.06651	41.478	40.9897	9.60946	49.6157	65.7185	109.036	2.53778	2.53028	1.76066	2.65402	2.84723	3.23141
344.5	0.351396	0.358835	0.213477	0.386509	0.439247	0.571373	3.59942	0.451	0.463	0.568	0.454	0.448	0.451	1.7936	1.7841	0.865183	1.95979	2.25702	2.91641	0.584225	0.578914	-0.144814	0.672836	0.814047	1.07035	41.6789	41.2385	9.69798	49.7603	65.999	110.195	2.54085	2.53411	1.7647	2.65596	2.85026	3.23997
344	0.351798	0.358934	0.214294	0.386839	0.439932	0.574749	3.60465	0.451	0.463	0.568	0.454	0.448	0.451	1.79565	1.78459	0.868494	1.96146	2.26054	2.93364	0.585368	0.57919	-0.140994	0.67369	0.815605	1.07624	41.8958	41.3813	9.80078	49.9903	66.3976	111.825	2.54415	2.5363	1.76936	2.65902	2.85455	3.25188
343.5	0.352065	0.359323	0.214603	0.387669	0.440429	0.577539	3.6099	0.451	0.463	0.568	0.454	0.448	0.451	1.79701	1.78653	0.869747	1.96567	2.2631	2.94788	0.586127	0.580273	-0.139553	0.675833	0.816734	1.08109	42.0817	41.5919	9.8577	50.3513	66.7416	113.243	2.54697	2.53952	1.77192	2.66381	2.85824	3.26214
343	0.352473	0.359559	0.215563	0.387922	0.440697	0.581472	3.61516	0.451	0.463	0.568	0.454	0.448	0.451	1.7991	1.7877	0.873637	1.96695	2.26447	2.96796	0.587285	0.58093	-0.13509	0.676485	0.817343	1.08787	42.3023	41.768	9.97511	50.5642	67.0178	115.125	2.5503	2.54221	1.77717	2.66662	2.8612	3.27561
342.5	0.352836	0.359843	0.215933	0.388342	0.441933	0.583855	3.62044	0.451	0.463	0.568	0.454	0.448	0.451	1.80095	1.78911	0.875137	1.96908	2.27083	2.98012	0.588314	0.581719	-0.133375	0.677568	0.820143	1.09196	42.5134	41.9563	10.0386	50.8218	67.5911	116.41	2.55347	2.54507	1.77999	2.67001	2.8673	3.28471
342	0.353352	0.36003	0.21706	0.388994	0.442116	0.587937	3.62573	0.451	0.463	0.568	0.454	0.448	0.451	1.80358	1.79004	0.879704	1.97239	2.27177	3.00096	0.589776	0.582239	-0.128169	0.679245	0.820557	1.09893	42.7626	42.1228	10.1734	51.1418	67.8451	118.389	2.55721	2.54759	1.78594	2.6742	2.86998	3.29858
341.5	0.353705	0.360393	0.217315	0.389084	0.443065	0.590548	3.63104	0.451	0.463	0.568	0.454	0.448	0.451	1.80539	1.79185	0.880738	1.97284	2.27664	3.01428	0.590774	0.583246	-0.126995	0.679476	0.822702	1.10336	42.9736	42.3315	10.2272	51.3154	68.3363	119.793	2.56036	2.55074	1.78829	2.67647	2.87517	3.30832
341	0.354003	0.36087	0.218292	0.389646	0.443625	0.595273	3.63636	0.451	0.463	0.568	0.454	0.448	0.451	1.80691	1.79422	0.884698	1.97569	2.27952	3.0384	0.591616	0.584569	-0.122509	0.68092	0.823965	1.11133	43.1724	42.5682	10.3496	51.6148	68.7102	122.074	2.56331	2.5543	1.79362	2.68036	2.87909	3.32396
340.5	0.3544	0.360686	0.218915	0.390077	0.444162	0.597704	3.6417	0.451	0.463	0.568	0.454	0.448	0.451	1.80893	1.7933	0.887222	1.97788	2.28228	3.05081	0.592737	0.584059	-0.11966	0.682025	0.825174	1.11541	43.3964	42.6497	10.4394	51.8811	69.0791	123.435	2.56663	2.55552	1.7975	2.68381	2.88295	3.33319
340	0.347359	0.379494	0.218352	0.393672	0.464415	0.614375	3.64706	0.451	0.463	0.568	0.454	0.448	0.451	1.77299	1.88681	0.884941	1.99611	2.38635	3.1359	0.57267	0.63489	-0.122235	0.691199	0.869764	1.14292	41.8119	47.3526	10.4163	52.9973	75.7448	130.801	2.54288	2.62323	1.79651	2.69813	2.95011	3.38184
339.5	0.34772	0.379881	0.219039	0.394518	0.465176	0.617065	3.65243	0.451	0.463	0.568	0.454	0.448	0.451	1.77484	1.88874	0.887725	2.0004	2.39026	3.14963	0.573709	0.635909	-0.119093	0.693346	0.871401	1.14729	42.0224	47.5891	10.5129	53.3822	76.2172	132.338	2.54607	2.6265	1.80065	2.70302	2.9547	3.39173
339	0.348187	0.380096	0.219931	0.394805	0.46587	0.622144	3.65782	0.451	0.463	0.568	0.454	0.448	0.451	1.77722	1.88981	0.89134	2.00185	2.39382	3.17556	0.575051	0.636475	-0.115029	0.694073	0.872892	1.15548	42.2597	47.7836	10.6299	53.6177	76.6705	134.922	2.54966	2.62918	1.80565	2.706	2.95908	3.40817
338.5	0.348517	0.3803	0.220578	0.395072	0.466859	0.625296	3.66322	0.451	0.463	0.568	0.454	0.448	0.451	1.7789	1.89082	0.893962	2.00321	2.3989	3.19164	0.575998	0.637012	-0.112092	0.694749	0.875012	1.16054	42.465	47.9764	10.7242	53.849	77.224	136.696	2.55275	2.63182	1.80964	2.70891	2.96441	3.41931
338	0.348954	0.380556	0.221571	0.395784	0.467327	0.630917	3.66864	0.451	0.463	0.568	0.454	0.448	0.451	1.78114	1.89209	0.897987	2.00682	2.40131	3.22033	0.577251	0.637685	-0.1076	0.69655	0.876014	1.16949	42.6976	48.1832	10.853	54.2033	77.608	139.576	2.55624	2.63466	1.81505	2.71335	2.96809	3.43719
337.5	0.349368	0.38071	0.222485	0.396223	0.468427	0.634389	3.67407	0.451	0.463	0.568	0.454	0.448	0.451	1.78325	1.89286	0.901691	2.00904	2.40696	3.23806	0.578437	0.638089	-0.103483	0.697658	0.878365	1.17497	42.9259	48.3652	10.9752	54.4846	78.205	141.535	2.55965	2.63714	1.82013	2.71687	2.97378	3.44918
337	0.349915	0.381206	0.223294	0.396571	0.469315	0.639445	3.67953	0.451	0.463	0.568	0.454	0.448	0.451	1.78604	1.89533	0.90497	2.01081	2.41152	3.26386	0.580001	0.639391	-0.0998538	0.698536	0.880259	1.18291	43.1883	48.6353	11.088	54.7425	78.7349	144.227	2.56355	2.64081	1.82479	2.72008	2.9788	3.46547
336.5	0.350381	0.381799	0.224242	0.396626	0.470019	0.643097	3.68499	0.451	0.463	0.568	0.454	0.448	0.451	1.78842	1.89827	0.908812	2.01109	2.41514	3.2825	0.581332	0.640946	-0.0956173	0.698675	0.881758	1.18861	43.4322	48.9318	11.2156	54.9205	79.2061	146.313	2.56716	2.64483	1.83002	2.72229	2.98325	3.47793
336	0.350836	0.382105	0.225474	0.39723	0.471	0.648897	3.69048	0.451	0.463	0.568	0.454	0.448	0.451	1.79074	1.8998	0.913805	2.01415	2.42018	3.31211	0.58263	0.641747	-0.0901383	0.700197	0.883843	1.19758	43.6748	49.1563	11.3729	55.252	79.774	149.408	2.57074	2.64786	1.8364	2.72638	2.98858	3.49618
335.5	0.35129	0.381878	0.226191	0.397816	0.472067	0.652709	3.69598	0.451	0.463	0.568	0.454	0.448	0.451	1.79306	1.89867	0.916711	2.01712	2.42567	3.33157	0.583923	0.641152	-0.0869633	0.701671	0.886106	1.20344	43.9185	49.2443	11.4795	55.5804	80.3749	151.62	2.57432	2.64904	1.84069	2.73043	2.99419	3.50904
335	0.351713	0.382523	0.227448	0.398383	0.472589	0.659013	3.70149	0.451	0.463	0.568	0.454	0.448	0.451	1.79522	1.90187	0.921805	2.01999	2.42835	3.36374	0.585126	0.64284	-0.0814215	0.703095	0.887211	1.21305	44.1558	49.5584	11.6421	55.9055	80.7933	155.024	2.57779	2.65326	1.84717	2.73441	2.99808	3.52858
334.5	0.352228	0.382899	0.228369	0.39864	0.473282	0.662962	3.70703	0.451	0.463	0.568	0.454	0.448	0.451	1.79785	1.90374	0.925538	2.0213	2.43191	3.3839	0.58659	0.643823	-0.0773804	0.70374	0.888676	1.21903	44.4177	49.8045	11.7717	56.1451	81.2729	157.357	2.5816	2.65654	1.85229	2.73734	3.00252	3.54178
334	0.352762	0.383118	0.22915	0.399604	0.474716	0.668813	3.71257	0.451	0.463	0.568	0.454	0.448	0.451	1.80057	1.90483	0.928703	2.02619	2.43928	3.41376	0.588105	0.644394	-0.0739663	0.706155	0.891702	1.22782	44.686	50.0108	11.8879	56.586	82.0111	160.627	2.58549	2.65929	1.85685	2.74269	3.00932	3.56004
333.5	0.353284	0.383799	0.229963	0.399773	0.475348	0.673139	3.71814	0.451	0.463	0.568	0.454	0.448	0.451	1.80324	1.90822	0.931998	2.02704	2.44252	3.43584	0.589583	0.64617	-0.0704247	0.706578	0.893032	1.23426	44.9528	50.3394	12.0083	56.8038	82.4764	163.199	2.58934	2.66365	1.86153	2.74533	3.01358	3.57421
333	0.353869	0.384041	0.231718	0.400606	0.476304	0.679975	3.72372	0.451	0.463	0.568	0.454	0.448	0.451	1.80622	1.90942	0.939111	2.03127	2.44744	3.47074	0.591238	0.646801	-0.062822	0.70866	0.895041	1.24437	45.2374	50.5544	12.2289	57.2122	83.0573	167.031	2.59343	2.66649	1.87002	2.75025	3.01887	3.59501
332.5	0.354465	0.384366	0.232708	0.401114	0.477568	0.684653	3.72932	0.451	0.463	0.568	0.454	0.448	0.451	1.80926	1.91104	0.943123	2.03384	2.45393	3.49461	0.592921	0.647646	-0.0585587	0.709927	0.897692	1.25122	45.5265	50.7924	12.3708	57.53	83.7501	169.847	2.59756	2.66962	1.87542	2.75406	3.02515	3.61006
332	0.355031	0.384634	0.233576	0.401857	0.478623	0.691667	3.73494	0.451	0.463	0.568	0.454	0.448	0.451	1.81215	1.91237	0.946641	2.03761	2.45935	3.53042	0.594516	0.648343	-0.0548356	0.711777	0.899898	1.26142	45.8097	51.0166	12.5008	57.9174	84.3741	173.868	2.60159	2.67256	1.88033	2.75869	3.03076	3.63124
331.5	0.355474	0.385256	0.23467	0.402316	0.479536	0.69687	3.74057	0.451	0.463	0.568	0.454	0.448	0.451	1.81441	1.91546	0.951075	2.03994	2.46404	3.55697	0.595763	0.649959	-0.0501628	0.712919	0.901804	1.26891	46.0627	51.3362	12.6563	58.225	84.9519	177.026	2.60518	2.67674	1.88615	2.76234	3.03594	3.64762
331	0.356202	0.385638	0.236047	0.402755	0.480675	0.703997	3.74622	0.451	0.463	0.568	0.454	0.448	0.451	1.81813	1.91736	0.956655	2.04216	2.4699	3.59335	0.597809	0.65095	-0.0443122	0.71401	0.904176	1.27909	46.3914	51.5936	12.8439	58.5286	85.6141	181.212	2.60981	2.68009	1.8931	2.76594	3.04184	3.66899
330.5	0.35677	0.386226	0.236859	0.40341	0.481922	0.708595	3.75189	0.451	0.463	0.568	0.454	0.448	0.451	1.82103	1.92029	0.959946	2.04548	2.4763	3.61682	0.599402	0.652474	-0.0408781	0.715635	0.906767	1.2856	46.6804	51.9077	12.9716	58.8969	86.3194	184.143	2.61387	2.68416	1.89779	2.77028	3.04809	3.68374
330	0.357371	0.386457	0.238692	0.404296	0.483423	0.716942	3.75758	0.451	0.463	0.568	0.454	0.448	0.451	1.8241	1.92143	0.967375	2.04998	2.48402	3.65942	0.601085	0.653072	-0.0331691	0.717828	0.909877	1.29731	46.9799	52.1275	13.2131	59.3353	87.1214	189.078	2.61805	2.68699	1.90656	2.77542	3.05514	3.70818
329.5	0.357895	0.386967	0.239078	0.40462	0.484312	0.721883	3.76328	0.451	0.463	0.568	0.454	0.448	0.451	1.82677	1.92397	0.968939	2.05162	2.48859	3.68464	0.602551	0.654391	-0.0315532	0.718629	0.911714	1.30417	47.2608	52.4239	13.2961	59.611	87.7077	192.275	2.62196	2.69081	1.90955	2.77864	3.06027	3.72375
329	0.358558	0.387391	0.241155	0.405515	0.485252	0.730496	3.769	0.451	0.463	0.568	0.454	0.448	0.451	1.83016	1.92608	0.977357	2.05616	2.49342	3.72861	0.604401	0.655486	-0.0229032	0.720839	0.913653	1.31603	47.5804	52.6986	13.5693	60.0571	88.3163	197.49	2.62638	2.69432	1.91929	2.78382	3.06556	3.74875
328.5	0.35931	0.38792	0.242124	0.405893	0.486286	0.736266	3.77473	0.451	0.463	0.568	0.454	0.448	0.451	1.83399	1.92871	0.981284	2.05807	2.49873	3.75806	0.606496	0.65685	-0.0188931	0.721771	0.915782	1.3239	47.9257	53.0036	13.7203	60.3524	88.9633	201.233	2.63113	2.69821	1.9246	2.78724	3.07116	3.76639
328	0.359964	0.388192	0.243944	0.406586	0.487637	0.744665	3.78049	0.451	0.463	0.568	0.454	0.448	0.451	1.83733	1.93006	0.98866	2.06159	2.50567	3.80093	0.608315	0.657551	-0.0114044	0.723477	0.918556	1.33525	48.2471	53.2399	13.9698	60.7435	89.7312	206.479	2.63553	2.70122	1.93329	2.79174	3.07777	3.79069
327.5	0.360578	0.388759	0.244917	0.406959	0.489011	0.750805	3.78626	0.451	0.463	0.568	0.454	0.448	0.451	1.84047	1.93288	0.992604	2.06348	2.51273	3.83227	0.610019	0.659011	-0.00742373	0.724394	0.92137	1.34346	48.5598	53.5587	14.1245	61.0409	90.5133	210.539	2.63979	2.70525	1.93862	2.79515	3.08445	3.80919
327	0.361289	0.389169	0.246643	0.408427	0.49092	0.760024	3.79205	0.451	0.463	0.568	0.454	0.448	0.451	1.8441	1.93492	0.999599	2.07092	2.52254	3.87932	0.611989	0.660065	-0.000401161	0.727994	0.925266	1.35566	48.9007	53.836	14.3681	61.6702	91.5006	216.401	2.64441	2.70875	1.94693	2.80233	3.09283	3.83544
326.5	0.362034	0.389808	0.248081	0.408964	0.491552	0.765881	3.79786	0.451	0.463	0.568	0.454	0.448	0.451	1.8479	1.9381	1.00543	2.07365	2.52579	3.90922	0.614049	0.661706	0.0054122	0.729308	0.926553	1.36334	49.2531	54.1785	14.5807	62.022	92.0175	220.423	2.64916	2.71304	1.95409	2.80632	3.09719	3.85314
326	0.362849	0.39049	0.249735	0.409706	0.493297	0.775414	3.80368	0.451	0.463	0.568	0.454	0.448	0.451	1.85206	1.94149	1.01213	2.07741	2.53475	3.95788	0.616298	0.663454	0.0120572	0.731121	0.930097	1.37571	49.627	54.5352	14.8211	62.4384	92.9565	226.638	2.65417	2.7175	1.9621	2.81101	3.10506	3.88001
325.5	0.363544	0.390574	0.250973	0.410458	0.494345	0.782006	3.80952	0.451	0.463	0.568	0.454	0.448	0.451	1.85561	1.9419	1.01715	2.08122	2.54014	3.99153	0.618211	0.663669	0.0170023	0.732955	0.932219	1.38417	49.9704	54.7264	15.0144	62.8605	93.6389	231.217	2.65875	2.71988	1.96846	2.81575	3.11074	3.89946
325	0.364258	0.391001	0.252844	0.411414	0.496328	0.791871	3.81538	0.451	0.463	0.568	0.454	0.448	0.451	1.85925	1.94403	1.02473	2.08607	2.55033	4.04188	0.620173	0.664761	0.0244296	0.735281	0.936222	1.39671	50.3214	55.015	15.2861	63.3481	94.6823	237.817	2.66341	2.72346	1.97731	2.8212	3.11937	3.927
324.5	0.364874	0.391865	0.254324	0.412038	0.497059	0.798294	3.82126	0.451	0.463	0.568	0.454	0.448	0.451	1.86239	1.94832	1.03073	2.08923	2.55408	4.07466	0.621863	0.666969	0.0302659	0.736797	0.937694	1.40479	50.6474	55.4288	15.5132	63.7364	95.2543	242.436	2.66771	2.72856	1.98461	2.82551	3.12407	3.94593
324	0.365817	0.392441	0.256473	0.413131	0.498982	0.809118	3.82716	0.451	0.463	0.568	0.454	0.448	0.451	1.86721	1.95119	1.03944	2.09477	2.56397	4.12991	0.624444	0.668437	0.0386803	0.739446	0.941555	1.41826	51.0668	55.7636	15.8253	64.2729	96.2892	249.824	2.67322	2.73267	1.99452	2.83144	3.13252	3.97565
323.5	0.366636	0.392773	0.257805	0.413911	0.500245	0.816395	3.83308	0.451	0.463	0.568	0.454	0.448	0.451	1.87139	1.95284	1.04484	2.09873	2.57046	4.16705	0.626681	0.669283	0.0438604	0.741332	0.944083	1.42721	51.4544	56.0308	16.0395	64.7154	97.0767	255.125	2.67828	2.73594	2.00123	2.8363	3.13891	3.99658
323	0.367401	0.393327	0.259945	0.415228	0.502421	0.82758	3.83901	0.451	0.463	0.568	0.454	0.448	0.451	1.87529	1.95559	1.05351	2.10541	2.58164	4.22414	0.628765	0.670693	0.052127	0.744509	0.948423	1.44082	51.8294	56.3631	16.3574	65.3297	98.2265	262.976	2.68314	2.73999	2.01108	2.84301	3.14816	4.02698
322.5	0.368224	0.394096	0.261393	0.415931	0.503416	0.83492	3.84496	0.451	0.463	0.568	0.454	0.448	0.451	1.87949	1.95941	1.05938	2.10897	2.58675	4.26161	0.631002	0.672646	0.0576819	0.7462	0.950402	1.44965	52.2235	56.7592	16.5915	65.7545	98.9219	268.492	2.68823	2.74479	2.01823	2.84762	3.15372	4.04793
322	0.369182	0.394785	0.263405	0.416956	0.505465	0.846021	3.85093	0.451	0.463	0.568	0.454	0.448	0.451	1.88438	1.96284	1.06753	2.11417	2.59728	4.31827	0.633601	0.674393	0.0653497	0.748662	0.954464	1.46286	52.6587	57.1349	16.9003	66.2844	100.039	276.536	2.69381	2.74932	2.02756	2.85333	3.16258	4.07791
321.5	0.370218	0.395178	0.2648	0.417984	0.506993	0.854149	3.85692	0.451	0.463	0.568	0.454	0.448	0.451	1.88967	1.96479	1.07319	2.11938	2.60513	4.35976	0.636403	0.675388	0.0706317	0.751124	0.957482	1.47242	53.1195	57.4269	17.1329	66.819	100.958	282.752	2.69969	2.75283	2.0345	2.85907	3.16982	4.10064
321	0.371185	0.39615	0.267498	0.418992	0.508517	0.865718	3.86293	0.451	0.463	0.568	0.454	0.448	0.451	1.89461	1.96963	1.08412	2.12449	2.61296	4.41881	0.639012	0.677844	0.080769	0.753533	0.960484	1.48587	53.5638	57.8897	17.5383	67.3509	101.882	291.369	2.70532	2.75836	2.04643	2.86474	3.17705	4.13153
320.5	0.372184	0.396728	0.268797	0.419927	0.510267	0.873944	3.86895	0.451	0.463	0.568	0.454	0.448	0.451	1.89971	1.9725	1.08939	2.12923	2.62195	4.4608	0.641699	0.679302	0.0856133	0.755762	0.963919	1.49533	54.0207	58.24	17.7644	67.8631	102.905	297.86	2.71107	2.76252	2.05299	2.87018	3.185	4.15435
320	0.373059	0.39739	0.271443	0.421368	0.51251	0.886937	3.875	0.451	0.463	0.568	0.454	0.448	0.451	1.90417	1.97579	1.10011	2.13654	2.63348	4.52712	0.644048	0.680969	0.0954091	0.759188	0.968305	1.51008	54.4448	58.6173	18.1725	68.5434	104.136	307.742	2.71637	2.76698	2.06468	2.87734	3.19448	4.18839
319.5	0.374086	0.397837	0.273025	0.42191	0.513911	0.89529	3.88106	0.451	0.463	0.568	0.454	0.448	0.451	1.90941	1.97801	1.10652	2.13929	2.64068	4.56975	0.646797	0.682094	0.10122	0.760473	0.971035	1.51946	54.9164	58.9333	18.4425	68.9351	105.035	314.548	2.72223	2.7707	2.07231	2.88144	3.20135	4.21135
319	0.375053	0.398567	0.27556	0.423444	0.515886	0.908823	3.88715	0.451	0.463	0.568	0.454	0.448	0.451	1.91435	1.98164	1.11679	2.14707	2.65082	4.63883	0.649378	0.683927	0.110462	0.764102	0.974871	1.53446	55.3739	59.3353	18.8455	69.6551	106.175	325.146	2.72789	2.77542	2.08354	2.88894	3.21001	4.24639
318.5	0.376082	0.39929	0.277269	0.42437	0.517696	0.91739	3.89325	0.451	0.463	0.568	0.454	0.448	0.451	1.9196	1.98524	1.12372	2.15176	2.66013	4.68255	0.652118	0.685739	0.116645	0.766287	0.978373	1.54384	55.8531	59.7379	19.14	70.1799	107.258	332.346	2.73377	2.78011	2.09163	2.89436	3.21816	4.2697
318	0.377136	0.40021	0.280336	0.425903	0.520276	0.930491	3.89937	0.451	0.463	0.568	0.454	0.448	0.451	1.92498	1.98981	1.13615	2.15953	2.67338	4.74942	0.654917	0.688041	0.127646	0.769893	0.983345	1.55802	56.3434	60.2024	19.6273	70.9103	108.67	342.982	2.73975	2.7855	2.10482	2.90187	3.2287	4.30346
317.5	0.378284	0.40092	0.281978	0.427127	0.521828	0.939903	3.90551	0.451	0.463	0.568	0.454	0.448	0.451	1.93084	1.99334	1.14281	2.16574	2.68136	4.79746	0.657956	0.689813	0.133486	0.772763	0.986323	1.56809	56.8656	60.6066	19.9205	71.5433	109.664	351.059	2.74607	2.79017	2.11264	2.90832	3.23606	4.32857
317	0.379375	0.401614	0.284785	0.428565	0.524245	0.954069	3.91167	0.451	0.463	0.568	0.454	0.448	0.451	1.93641	1.99679	1.15418	2.17303	2.69378	4.86977	0.660836	0.691543	0.143391	0.776124	0.990944	1.58305	57.3746	61.0086	20.3832	72.2532	111.032	362.862	2.7522	2.79478	2.1248	2.91551	3.2461	4.36451
316.5	0.380569	0.402279	0.286585	0.42955	0.525865	0.963813	3.91785	0.451	0.463	0.568	0.454	0.448	0.451	1.94251	2.0001	1.16148	2.17803	2.7021	4.91951	0.663978	0.693197	0.149692	0.778419	0.99403	1.59321	57.9189	61.4044	20.707	72.8152	112.073	371.483	2.7587	2.7993	2.13319	2.92116	3.25368	4.3902
316	0.381724	0.403133	0.289529	0.431216	0.528293	0.978489	3.92405	0.451	0.463	0.568	0.454	0.448	0.451	1.9484	2.00435	1.17341	2.18647	2.71458	4.99442	0.667009	0.695318	0.159912	0.78229	0.998636	1.60832	58.4555	61.8607	21.2015	73.6136	113.468	384.095	2.76507	2.80449	2.14581	2.92914	3.26376	4.427
315.5	0.382984	0.403641	0.29145	0.432011	0.530229	0.988684	3.93027	0.451	0.463	0.568	0.454	0.448	0.451	1.95483	2.00687	1.18119	2.19051	2.72452	5.04645	0.670304	0.696577	0.166525	0.784132	1.00229	1.61869	59.0287	62.2134	21.552	74.1196	114.664	393.384	2.77183	2.80848	2.15462	2.93416	3.27233	4.45353
315	0.384244	0.404833	0.294707	0.433912	0.532448	1.00412	3.93651	0.451	0.463	0.568	0.454	0.448	0.451	1.96126	2.0128	1.19439	2.20014	2.73593	5.12524	0.673589	0.699526	0.177639	0.788523	1.00647	1.63418	59.6066	62.7802	22.1064	75.0109	115.993	407.053	2.77858	2.81485	2.16835	2.94294	3.28177	4.49172
314.5	0.385351	0.40522	0.29675	0.435281	0.533972	1.01423	3.94277	0.451	0.463	0.568	0.454	0.448	0.451	1.96691	2.01472	1.20267	2.20709	2.74376	5.17685	0.676466	0.700481	0.184547	0.791673	1.00933	1.6442	60.1413	63.1005	22.4852	75.7252	117.029	416.613	2.78479	2.81844	2.17758	2.94992	3.28907	4.51786
314	0.386719	0.406428	0.300049	0.436764	0.53708	1.02956	3.94904	0.451	0.463	0.568	0.454	0.448	0.451	1.9739	2.02073	1.21604	2.21461	2.75973	5.25509	0.680009	0.703458	0.195603	0.795074	1.01513	1.6592	60.7621	63.6795	23.0612	76.4851	118.773	430.67	2.79195	2.82488	2.19139	2.95729	3.30126	4.5555
313.5	0.388117	0.407345	0.302183	0.43802	0.539118	1.04101	3.95534	0.451	0.463	0.568	0.454	0.448	0.451	1.98103	2.02529	1.22469	2.22097	2.7702	5.31354	0.683618	0.705712	0.20269	0.797946	1.01892	1.67026	61.3976	64.1714	23.4651	77.1712	120.058	441.708	2.79922	2.83032	2.20093	2.9639	3.31015	4.58441
313	0.389234	0.408471	0.305437	0.439918	0.542052	1.05772	3.96166	0.451	0.463	0.568	0.454	0.448	0.451	1.98673	2.03089	1.23788	2.2306	2.78528	5.39883	0.686492	0.708472	0.2134	0.802269	1.02435	1.68618	61.9489	64.733	24.0498	78.0903	121.756	457.461	2.80549	2.83649	2.21451	2.97269	3.32179	4.62475
312.5	0.390716	0.408884	0.307762	0.440981	0.544263	1.0691	3.968	0.451	0.463	0.568	0.454	0.448	0.451	1.9943	2.03294	1.2473	2.23599	2.79664	5.45691	0.690292	0.709483	0.220984	0.804683	1.02842	1.69688	62.6215	65.0717	24.4956	78.7194	123.145	468.854	2.81307	2.84019	2.2247	2.97866	3.33122	4.65328
312	0.391992	0.410062	0.311176	0.443151	0.546891	1.08617	3.97436	0.451	0.463	0.568	0.454	0.448	0.451	2.00081	2.0388	1.26114	2.24699	2.81014	5.54404	0.693552	0.71236	0.232016	0.809592	1.03323	1.71272	63.2333	65.6571	25.1224	79.7511	124.736	485.498	2.81992	2.84656	2.2388	2.98837	3.34193	4.69404
311.5	0.393451	0.410722	0.313859	0.44409	0.5491	1.09768	3.98074	0.451	0.463	0.568	0.454	0.448	0.451	2.00826	2.04208	1.27201	2.25175	2.82149	5.60279	0.697268	0.713968	0.240601	0.811708	1.03727	1.72327	63.9096	66.0803	25.6396	80.3467	126.149	497.435	2.82743	2.85114	2.25023	2.99393	3.35136	4.72263
311	0.394976	0.411894	0.317079	0.446215	0.552196	1.11483	3.98714	0.451	0.463	0.568	0.454	0.448	0.451	2.01604	2.0479	1.28506	2.26253	2.8374	5.69033	0.701136	0.716817	0.250808	0.816482	1.04289	1.73877	64.6132	66.6718	26.2526	81.3785	127.986	514.751	2.83518	2.8575	2.26356	3.0035	3.3635	4.76321
310.5	0.396311	0.412768	0.319438	0.447549	0.554089	1.12706	3.99356	0.451	0.463	0.568	0.454	0.448	0.451	2.02286	2.05225	1.29462	2.26929	2.84713	5.75275	0.70451	0.718937	0.25822	0.819467	1.04631	1.74968	65.2604	67.1709	26.7305	82.1297	129.281	527.803	2.84225	2.86283	2.2738	3.01041	3.37197	4.79312
310	0.397753	0.414102	0.32349	0.449855	0.55753	1.14464	4	0.451	0.463	0.568	0.454	0.448	0.451	2.03022	2.05888	1.31105	2.28098	2.86481	5.84249	0.708142	0.722164	0.270825	0.824606	1.0525	1.76516	65.9484	67.824	27.5015	83.2461	131.314	546.154	2.84971	2.86976	2.29002	3.02058	3.38515	4.83425
309.5	0.399409	0.414858	0.325823	0.450785	0.559421	1.15772	4.00646	0.451	0.463	0.568	0.454	0.448	0.451	2.03867	2.06264	1.3205	2.2857	2.87452	5.90925	0.712297	0.723988	0.278011	0.826672	1.05589	1.77652	66.7137	68.292	27.9898	83.861	132.634	560.514	2.85794	2.8747	2.30012	3.02615	3.39362	4.86572
309	0.400949	0.416101	0.33013	0.453087	0.562972	1.17602	4.01294	0.451	0.463	0.568	0.454	0.448	0.451	2.04653	2.06882	1.33796	2.29737	2.89277	6.00266	0.716145	0.726979	0.291143	0.831765	1.06221	1.7922	67.4469	68.9243	28.8277	84.9941	134.758	580.248	2.86576	2.88133	2.31714	3.03632	3.40713	4.90799
308.5	0.40243	0.416877	0.332537	0.45486	0.5652	1.18856	4.01945	0.451	0.463	0.568	0.454	0.448	0.451	2.05409	2.07268	1.34771	2.30636	2.90422	6.06666	0.719832	0.728842	0.298408	0.835671	1.06616	1.80281	68.1665	69.4061	29.3445	85.9384	136.267	594.611	2.87338	2.88635	2.32746	3.04472	3.41663	4.93808
308	0.40402	0.417991	0.336479	0.456885	0.568786	1.20801	4.02597	0.451	0.463	0.568	0.454	0.448	0.451	2.0622	2.07822	1.36369	2.31663	2.92265	6.16594	0.723775	0.731511	0.310193	0.840113	1.07249	1.81904	68.9295	70.0043	30.142	86.9871	138.45	616.227	2.88139	2.89255	2.34311	3.05396	3.43023	4.98236
307.5	0.405689	0.419075	0.339172	0.458175	0.571093	1.22149	4.03252	0.451	0.463	0.568	0.454	0.448	0.451	2.07072	2.08361	1.3746	2.32317	2.9345	6.23474	0.727898	0.734101	0.318164	0.842932	1.07654	1.83014	69.7264	70.5968	30.7261	87.7637	140.03	632.107	2.88968	2.89865	2.35438	3.06076	3.43998	5.01415
307	0.407477	0.420298	0.343595	0.460518	0.574443	1.24106	4.03909	0.451	0.463	0.568	0.454	0.448	0.451	2.07985	2.08969	1.39253	2.33505	2.95171	6.33463	0.732295	0.737015	0.331121	0.848033	1.08239	1.84603	70.5717	71.241	31.6355	88.9526	142.14	654.651	2.8984	2.90524	2.37161	3.07107	3.45286	5.05827
306.5	0.4093	0.421033	0.346435	0.46215	0.576503	1.25431	4.04568	0.451	0.463	0.568	0.454	0.448	0.451	2.08915	2.09334	1.40404	2.34332	2.9623	6.40227	0.736759	0.738762	0.339352	0.851571	1.08597	1.85665	71.437	71.7238	32.2656	89.8767	143.628	670.888	2.90724	2.91015	2.38333	3.07902	3.46186	5.08935
306	0.411175	0.422244	0.350762	0.464609	0.580388	1.2747	4.05229	0.451	0.463	0.568	0.454	0.448	0.451	2.09872	2.09936	1.42157	2.35579	2.98226	6.50634	0.74133	0.741635	0.351765	0.856877	1.09268	1.87278	72.3288	72.3729	33.1848	91.1328	146.047	695.143	2.91627	2.91672	2.40013	3.08972	3.47635	5.13474
305.5	0.412921	0.423556	0.353745	0.46616	0.582946	1.28815	4.05892	0.451	0.463	0.568	0.454	0.448	0.451	2.10764	2.10589	1.43366	2.36366	2.99541	6.57499	0.745567	0.744737	0.360233	0.86021	1.09708	1.88327	73.1834	73.062	33.8622	92.0428	147.82	712.215	2.92485	2.92363	2.41229	3.0974	3.48685	5.16598
305	0.414698	0.424937	0.357973	0.468536	0.586679	1.30953	4.06557	0.451	0.463	0.568	0.454	0.448	0.451	2.11671	2.11275	1.4508	2.3757	3.01459	6.68412	0.749862	0.747992	0.372114	0.865294	1.10346	1.89973	74.0568	73.7805	34.7903	93.2886	150.21	738.469	2.93354	2.93079	2.42865	3.10783	3.50086	5.21294
304.5	0.41652	0.425921	0.360942	0.470391	0.58918	1.32299	4.07225	0.451	0.463	0.568	0.454	0.448	0.451	2.12601	2.11765	1.46283	2.38511	3.02744	6.75282	0.754245	0.750305	0.380374	0.869245	1.10772	1.90996	74.9546	74.3662	35.486	94.3378	151.992	756.205	2.94239	2.93659	2.4407	3.11653	3.51119	5.24397
304	0.418442	0.427514	0.36572	0.472822	0.592904	1.34465	4.07895	0.451	0.463	0.568	0.454	0.448	0.451	2.13582	2.12557	1.4822	2.39744	3.04657	6.86338	0.758849	0.754038	0.393525	0.8744	1.11402	1.9262	75.8969	75.1702	36.5517	95.6292	154.426	783.74	2.95159	2.9445	2.45882	3.12714	3.52517	5.29106
303.5	0.420452	0.428348	0.369142	0.474163	0.595243	1.35944	4.08567	0.451	0.463	0.568	0.454	0.448	0.451	2.14608	2.12971	1.49606	2.40424	3.05859	6.93887	0.763641	0.755987	0.402838	0.877232	1.11795	1.93714	76.8805	75.7126	37.3617	96.4895	156.16	803.718	2.96111	2.9498	2.47233	3.13415	3.53502	5.32446
303	0.422376	0.429915	0.373581	0.477122	0.59979	1.3808	4.09241	0.451	0.463	0.568	0.454	0.448	0.451	2.1559	2.1375	1.51406	2.41924	3.08196	7.0479	0.768207	0.759639	0.414792	0.883453	1.12556	1.95273	77.842	76.5195	38.3921	98.0203	159.078	831.912	2.97032	2.95762	2.4892	3.14651	3.55143	5.37056
302.5	0.424388	0.430984	0.377147	0.478867	0.602369	1.39596	4.09917	0.451	0.463	0.568	0.454	0.448	0.451	2.16617	2.14282	1.52851	2.42809	3.09521	7.12528	0.772959	0.762122	0.424292	0.887104	1.12986	1.96365	78.8454	77.1549	39.258	99.0653	160.98	853.092	2.97985	2.96375	2.50312	3.15486	3.56199	5.40442
302	0.426469	0.432665	0.381835	0.481488	0.606398	1.41837	4.10596	0.451	0.463	0.568	0.454	0.448	0.451	2.17679	2.15118	1.54751	2.44138	3.11591	7.23966	0.777851	0.766015	0.436645	0.892562	1.13652	1.97957	79.8844	78.0156	40.3734	100.485	163.682	883.621	2.98962	2.97198	2.52071	3.1661	3.57684	5.45213
301.5	0.428484	0.433574	0.38536	0.483249	0.609282	1.43358	4.11277	0.451	0.463	0.568	0.454	0.448	0.451	2.18707	2.1557	1.56179	2.45031	3.13073	7.3173	0.782564	0.768114	0.445835	0.896213	1.14127	1.99024	80.9088	78.6039	41.2587	101.557	165.791	905.67	2.99915	2.97756	2.53442	3.17452	3.58831	5.48583
301	0.430724	0.435185	0.390516	0.485764	0.613316	1.45618	4.1196	0.451	0.463	0.568	0.454	0.448	0.451	2.19851	2.16371	1.58269	2.46306	3.15146	7.43265	0.787778	0.771822	0.459126	0.901404	1.14787	2.00588	82.0287	79.4524	42.5111	102.958	168.552	937.558	3.00948	2.98557	2.55344	3.18541	3.60316	5.53349
300.5	0.432898	0.43636	0.393846	0.487981	0.61594	1.4709	4.12646	0.451	0.463	0.568	0.454	0.448	0.451	2.2096	2.16955	1.59619	2.4743	3.16494	7.50779	0.792813	0.774519	0.467617	0.905958	1.15213	2.01594	83.1349	80.148	43.3832	104.246	170.563	959.795	3.01957	2.99208	2.56644	3.19532	3.61386	5.56602
300	0.435109	0.437993	0.39908	0.490885	0.620616	1.49506	4.13333	0.451	0.463	0.568	0.454	0.448	0.451	2.22089	2.17767	1.6174	2.48902	3.18897	7.6311	0.797908	0.778254	0.480819	0.911891	1.1597	2.03223	84.2664	81.0184	44.6925	105.842	173.741	994.891	3.0298	3.00017	2.58558	3.20749	3.63057	5.61622
299.5	0.437417	0.439146	0.402525	0.492559	0.623211	1.50953	4.14023	0.451	0.463	0.568	0.454	0.448	0.451	2.23267	2.1834	1.63136	2.49751	3.2023	7.70496	0.803198	0.780883	0.489414	0.915295	1.16387	2.04186	85.4473	81.7177	45.6194	106.922	175.782	1017.63	3.04036	3.00662	2.59889	3.21563	3.64119	5.64804
299	0.439735	0.440968	0.408057	0.495351	0.627982	1.53378	4.14716	0.451	0.463	0.568	0.454	0.448	0.451	2.2445	2.19246	1.65378	2.51167	3.22682	7.82874	0.808483	0.785024	0.503064	0.920948	1.1715	2.0578	86.6444	82.673	47.0388	108.499	179.081	1054.11	3.05095	3.01537	2.61887	3.22743	3.65816	5.69798
298.5	0.442097	0.44215	0.41181	0.497695	0.630876	1.5498	4.1541	0.451	0.463	0.568	0.454	0.448	0.451	2.25656	2.19834	1.66899	2.52355	3.24169	7.91051	0.81384	0.7877	0.512219	0.925669	1.17609	2.06819	87.8714	83.3955	48.0687	109.896	181.342	1079.85	3.06169	3.02194	2.63309	3.23776	3.66965	5.73246
298	0.444392	0.443877	0.417391	0.500736	0.635386	1.57431	4.16107	0.451	0.463	0.568	0.454	0.448	0.451	2.26827	2.20692	1.69161	2.53897	3.26486	8.03561	0.819018	0.791599	0.52568	0.93176	1.18322	2.08388	89.0842	84.3305	49.5463	111.616	184.561	1118.02	3.07221	3.03037	2.65309	3.25036	3.68583	5.78245
297.5	0.446741	0.445268	0.421249	0.502444	0.637994	1.59037	4.16807	0.451	0.463	0.568	0.454	0.448	0.451	2.28026	2.21384	1.70725	2.54763	3.27826	8.11759	0.82429	0.794728	0.534881	0.935165	1.18731	2.09403	90.3314	85.1454	50.6362	112.757	186.706	1144.78	3.0829	3.03767	2.66757	3.25864	3.69649	5.81676
297	0.449135	0.446998	0.426935	0.505743	0.642793	1.61427	4.17508	0.451	0.463	0.568	0.454	0.448	0.451	2.29248	2.22244	1.73029	2.56436	3.30292	8.23958	0.829634	0.798605	0.548289	0.94171	1.19481	2.10895	91.6098	86.0974	52.1877	114.628	190.164	1183.42	3.09375	3.04612	2.68777	3.27207	3.71349	5.86523
296.5	0.45171	0.44821	0.43063	0.508105	0.646301	1.63057	4.18212	0.451	0.463	0.568	0.454	0.448	0.451	2.30562	2.22847	1.74526	2.57634	3.32095	8.32278	0.835351	0.801313	0.556906	0.946369	1.20025	2.119	92.976	86.8572	53.2741	116.091	192.894	1211.52	3.10522	3.05282	2.70165	3.28246	3.72674	5.89974
296	0.454127	0.450275	0.436636	0.510904	0.65087	1.65566	4.18919	0.451	0.463	0.568	0.454	0.448	0.451	2.31796	2.23873	1.76961	2.59053	3.34443	8.45084	0.840688	0.80591	0.570757	0.951863	1.2073	2.13427	94.2914	87.9558	54.9557	117.771	196.292	1253.31	3.11615	3.06243	2.72272	3.29427	3.74305	5.94997
295.5	0.456722	0.451433	0.440516	0.513013	0.654134	1.67302	4.19628	0.451	0.463	0.568	0.454	0.448	0.451	2.33121	2.24449	1.78533	2.60122	3.3612	8.53945	0.846386	0.808478	0.579604	0.955982	1.2123	2.1447	95.6951	88.7082	56.1262	119.147	198.937	1284.07	3.12768	3.06896	2.7371	3.30386	3.7556	5.98614
295	0.459324	0.453204	0.44635	0.516416	0.659077	1.69838	4.20339	0.451	0.463	0.568	0.454	0.448	0.451	2.34449	2.2533	1.80897	2.61848	3.3866	8.66889	0.852067	0.812394	0.59276	0.962594	1.21983	2.15974	97.117	89.7089	57.8182	121.143	202.641	1327.78	3.13923	3.07758	2.7575	3.3176	3.77295	6.03645
294.5	0.46187	0.454695	0.450478	0.519041	0.661765	1.71494	4.21053	0.451	0.463	0.568	0.454	0.448	0.451	2.35748	2.26071	1.8257	2.63179	3.40041	8.75342	0.857594	0.815678	0.601966	0.967664	1.2239	2.16944	98.5303	90.607	59.0927	122.793	204.991	1358.4	3.15059	3.08525	2.77258	3.32885	3.78385	6.07096
294	0.464543	0.456669	0.456641	0.522077	0.666638	1.73943	4.21769	0.451	0.463	0.568	0.454	0.448	0.451	2.37113	2.27052	1.85068	2.64718	3.42545	8.87842	0.863365	0.82001	0.615554	0.973496	1.23123	2.18362	100.013	91.7066	60.9274	124.657	208.729	1402.23	3.16238	3.09457	2.79385	3.34141	3.80098	6.11935
293.5	0.467133	0.458182	0.460935	0.524194	0.670509	1.7571	4.22487	0.451	0.463	0.568	0.454	0.448	0.451	2.38435	2.27805	1.86809	2.65792	3.44534	8.96861	0.868925	0.823318	0.624914	0.977543	1.23702	2.19373	101.477	92.63	62.2903	126.099	211.881	1435.75	3.17389	3.10233	2.80935	3.35102	3.81525	6.15559
293	0.469859	0.45998	0.467005	0.527984	0.675348	1.78332	4.23208	0.451	0.463	0.568	0.454	0.448	0.451	2.39826	2.28698	1.89269	2.67713	3.4702	9.10244	0.874744	0.827234	0.637997	0.984747	1.24421	2.20854	103.015	93.6774	64.1601	128.366	215.684	1483.97	3.18585	3.11106	2.83019	3.36598	3.83226	6.20663
292.5	0.472728	0.46151	0.471479	0.530157	0.679107	1.79946	4.23932	0.451	0.463	0.568	0.454	0.448	0.451	2.4129	2.29459	1.91082	2.68815	3.48952	9.18483	0.880831	0.830555	0.647531	0.988854	1.24976	2.21755	104.634	94.6243	65.6191	129.867	218.838	1516.12	3.19829	3.11889	2.84615	3.37579	3.84619	6.23998
292	0.475521	0.463811	0.477744	0.533597	0.683922	1.82693	4.24658	0.451	0.463	0.568	0.454	0.448	0.451	2.42716	2.30603	1.93621	2.7056	3.51426	9.32504	0.886722	0.835528	0.660732	0.995322	1.25683	2.2327	106.237	95.8977	67.6055	132.009	222.713	1568.12	3.21047	3.12934	2.86745	3.38962	3.8631	6.29281
291.5	0.478342	0.4651	0.481941	0.536017	0.687157	1.8444	4.25386	0.451	0.463	0.568	0.454	0.448	0.451	2.44156	2.31244	1.95322	2.71787	3.53088	9.41421	0.892637	0.838304	0.669479	0.999847	1.26155	2.24222	107.87	96.7626	69.0348	133.666	225.597	1603.74	3.22274	3.13637	2.88248	3.40021	3.87555	6.32825
291	0.481258	0.467304	0.488458	0.539464	0.692667	1.8701	4.26117	0.451	0.463	0.568	0.454	0.448	0.451	2.45644	2.3234	1.97963	2.73534	3.5592	9.54539	0.898714	0.843031	0.68291	1.00626	1.26953	2.25606	109.565	98.0178	71.1583	135.857	230.018	1654.42	3.23532	3.14649	2.9044	3.41405	3.8944	6.37766
290.5	0.484114	0.468577	0.493031	0.541905	0.696143	1.88763	4.2685	0.451	0.463	0.568	0.454	0.448	0.451	2.47102	2.32973	1.99816	2.74772	3.57706	9.63487	0.904631	0.845752	0.692229	1.01077	1.27454	2.26539	111.251	98.8921	72.7467	137.561	233.132	1691.38	3.2477	3.15348	2.92047	3.42471	3.90752	6.41299
290	0.487075	0.47119	0.499415	0.545685	0.701565	1.91544	4.27586	0.451	0.463	0.568	0.454	0.448	0.451	2.48613	2.34272	2.02404	2.76689	3.60492	9.77681	0.910729	0.851313	0.705094	1.01772	1.2823	2.28001	113.005	100.343	74.9005	139.969	237.595	1747.6	3.26042	3.16499	2.94185	3.4396	3.92608	6.46562
289.5	0.490095	0.472158	0.504141	0.547999	0.705104	1.93215	4.28325	0.451	0.463	0.568	0.454	0.448	0.451	2.50155	2.34753	2.04319	2.77862	3.6231	9.8621	0.91691	0.853365	0.714513	1.02195	1.28733	2.2887	114.806	101.104	76.5886	141.646	240.828	1784.37	3.27334	3.17097	2.95829	3.44986	3.93937	6.49937
289	0.493022	0.474818	0.511136	0.552107	0.710648	1.9588	4.29066	0.451	0.463	0.568	0.454	0.448	0.451	2.51649	2.36076	2.07154	2.79945	3.65159	9.99813	0.922865	0.858983	0.728293	1.02942	1.29516	2.3024	116.584	102.601	79.0014	144.276	245.477	1840.29	3.28594	3.18264	2.98132	3.46576	3.95825	6.5497
288.5	0.496107	0.476448	0.515446	0.554404	0.714286	1.97624	4.29809	0.451	0.463	0.568	0.454	0.448	0.451	2.53224	2.36886	2.08901	2.8111	3.67028	10.0871	0.929103	0.86241	0.736689	1.03357	1.30027	2.31126	118.457	103.665	80.618	145.983	248.857	1879.7	3.29906	3.19086	2.99646	3.47597	3.9718	6.58449
288	0.499243	0.478471	0.522468	0.558286	0.720291	2.00444	4.30556	0.451	0.463	0.568	0.454	0.448	0.451	2.54824	2.37892	2.11747	2.83078	3.70114	10.2311	0.935404	0.866647	0.750221	1.04055	1.30864	2.32543	120.376	104.91	83.1174	148.549	253.939	1940.45	3.31234	3.2004	3.01942	3.49114	3.99192	6.63706
287.5	0.502242	0.480208	0.527298	0.561038	0.723615	2.02247	4.31304	0.451	0.463	0.568	0.454	0.448	0.451	2.56355	2.38756	2.13704	2.84473	3.71822	10.3231	0.941393	0.870271	0.759423	1.04547	1.31324	2.33439	122.251	106.041	84.956	150.54	257.18	1982.39	3.32516	3.20899	3.03598	3.50278	4.0046	6.67263
287	0.505341	0.482566	0.534282	0.565341	0.729553	2.04972	4.32056	0.451	0.463	0.568	0.454	0.448	0.451	2.57937	2.39928	2.16535	2.86655	3.74873	10.4622	0.947544	0.875169	0.772581	1.05311	1.32142	2.34777	124.196	107.459	87.5255	153.391	262.33	2043.27	3.33831	3.21966	3.05868	3.51925	4.0245	6.72329
286.5	0.508545	0.484318	0.53885	0.567679	0.733535	2.06888	4.3281	0.451	0.463	0.568	0.454	0.448	0.451	2.59572	2.40799	2.18386	2.87841	3.76919	10.56	0.953865	0.878793	0.781094	1.05724	1.32686	2.35707	126.215	108.619	89.3396	155.202	266.128	2088.92	3.3518	3.22832	3.0744	3.52959	4.03899	6.76053
286	0.511767	0.48678	0.546335	0.571663	0.739065	2.09549	4.33566	0.451	0.463	0.568	0.454	0.448	0.451	2.61217	2.42023	2.2142	2.89861	3.79761	10.6958	0.96018	0.883864	0.794889	1.06423	1.33437	2.36985	128.267	110.11	92.1602	157.939	271.101	2150.5	3.36534	3.23934	3.09839	3.54505	4.05773	6.80981
285.5	0.514942	0.488447	0.55107	0.574415	0.742891	2.11305	4.34326	0.451	0.463	0.568	0.454	0.448	0.451	2.62837	2.42852	2.23339	2.91256	3.81727	10.7855	0.966365	0.887282	0.803519	1.06903	1.33953	2.3782	130.318	111.254	94.0933	160.023	274.875	2194.36	3.37871	3.24772	3.11451	3.55669	4.07178	6.84427
285	0.518119	0.490805	0.558074	0.578714	0.748765	2.14131	4.35088	0.451	0.463	0.568	0.454	0.448	0.451	2.64459	2.44024	2.26177	2.93436	3.84745	10.9297	0.972516	0.892098	0.816148	1.07649	1.34741	2.39148	132.395	112.725	96.8392	162.997	280.22	2261.36	3.39209	3.25841	3.13699	3.5731	4.09143	6.89593
284.5	0.521279	0.492625	0.562799	0.581388	0.752487	2.1574	4.35852	0.451	0.463	0.568	0.454	0.448	0.451	2.66072	2.44929	2.28092	2.94792	3.86657	11.0118	0.978596	0.895799	0.824579	1.0811	1.35237	2.39897	134.486	113.962	98.8324	165.086	284.009	2303.55	3.40541	3.26731	3.15301	3.58449	4.10519	6.92787
284	0.524671	0.494847	0.570407	0.585415	0.758475	2.18568	4.3662	0.451	0.463	0.568	0.454	0.448	0.451	2.67803	2.46034	2.31176	2.96834	3.89734	11.1562	0.985082	0.9003	0.838007	1.088	1.36029	2.41199	136.722	115.398	101.88	167.971	289.564	2372.67	3.41948	3.27755	3.17704	3.60005	4.12511	6.97926
283.5	0.527831	0.496506	0.575001	0.588046	0.762482	2.20557	4.3739	0.451	0.463	0.568	0.454	0.448	0.451	2.69416	2.46859	2.33037	2.98168	3.91793	11.2577	0.991087	0.903647	0.846029	1.09249	1.36556	2.42105	138.862	116.583	103.894	170.082	293.664	2424.58	3.43278	3.28593	3.19262	3.61131	4.13964	7.01712
283	0.53108	0.499251	0.582605	0.591826	0.768298	2.2304	4.38163	0.451	0.463	0.568	0.454	0.448	0.451	2.71075	2.48224	2.36119	3.00084	3.94782	11.3844	0.997224	0.90916	0.859166	1.09889	1.37316	2.43225	141.074	118.292	107.037	172.885	299.216	2488.25	3.44637	3.29791	3.2165	3.6261	4.15907	7.06274
282.5	0.534513	0.500992	0.587358	0.594919	0.772514	2.2499	4.38938	0.451	0.463	0.568	0.454	0.448	0.451	2.72827	2.49089	2.38045	3.01653	3.96948	11.484	1.00367	0.912641	0.867291	1.10411	1.37864	2.44095	143.41	119.541	109.176	175.316	303.58	2540.92	3.46055	3.30658	3.23245	3.63878	4.17415	7.09982
282	0.537818	0.503714	0.594995	0.599178	0.778242	2.27545	4.39716	0.451	0.463	0.568	0.454	0.448	0.451	2.74514	2.50443	2.41141	3.03812	3.99891	11.6144	1.00983	0.91806	0.88021	1.11124	1.38602	2.45224	145.705	121.272	112.431	178.466	309.193	2608.18	3.47431	3.31849	3.25628	3.65501	4.19331	7.14635
281.5	0.541154	0.505381	0.600043	0.602	0.782558	2.29541	4.40497	0.451	0.463	0.568	0.454	0.448	0.451	2.76217	2.51272	2.43186	3.05243	4.02109	11.7163	1.01601	0.921364	0.888658	1.11594	1.39155	2.46098	148.042	122.51	114.753	180.792	313.743	2663.57	3.48816	3.32693	3.27296	3.66686	4.20866	7.184
281	0.54462	0.507938	0.60767	0.606543	0.788642	2.32092	4.41281	0.451	0.463	0.568	0.454	0.448	0.451	2.77986	2.52543	2.46278	3.07547	4.05235	11.8465	1.0224	0.926411	0.901289	1.12346	1.3993	2.47203	150.479	124.194	118.108	184.184	319.775	2732.8	3.50243	3.3383	3.29663	3.68395	4.22874	7.23023
280.5	0.548148	0.509697	0.612827	0.609001	0.792777	2.34113	4.42068	0.451	0.463	0.568	0.454	0.448	0.451	2.79786	2.53417	2.48368	3.08793	4.0736	11.9496	1.02886	0.929868	0.90974	1.1275	1.40453	2.4807	152.979	125.502	120.55	186.343	324.291	2790.53	3.51688	3.34705	3.31354	3.69469	4.24359	7.26811
280	0.551555	0.512485	0.620266	0.613598	0.79915	2.36705	4.42857	0.451	0.463	0.568	0.454	0.448	0.451	2.81525	2.54804	2.51382	3.11124	4.10635	12.0819	1.03505	0.935323	0.921805	1.13502	1.41253	2.49171	155.44	127.332	123.936	189.843	330.703	2862.86	3.53094	3.35919	3.33656	3.71192	4.26442	7.31476
279.5	0.555031	0.514387	0.625502	0.61612	0.803099	2.38472	4.43649	0.451	0.463	0.568	0.454	0.448	0.451	2.833	2.55749	2.53505	3.12403	4.12664	12.1721	1.04133	0.939027	0.930211	1.13912	1.41746	2.49915	157.969	128.738	126.489	192.092	335.176	2916.16	3.54522	3.36843	3.35361	3.72287	4.27876	7.34857
279	0.558447	0.517176	0.633208	0.620734	0.809635	2.41281	4.44444	0.451	0.463	0.568	0.454	0.448	0.451	2.85043	2.57136	2.56628	3.14742	4.16022	12.3155	1.04747	0.944434	0.942456	1.14658	1.42557	2.51086	160.493	130.605	130.089	195.679	341.876	2995.98	3.5593	3.38057	3.37723	3.74013	4.29999	7.39835
278.5	0.561946	0.518929	0.638325	0.623591	0.813683	2.43165	4.45242	0.451	0.463	0.568	0.454	0.448	0.451	2.86829	2.58007	2.58701	3.16191	4.18102	12.4117	1.05372	0.947818	0.950504	1.15118	1.43056	2.51864	163.095	131.965	132.675	198.194	346.544	3053.88	3.57363	3.38933	3.39389	3.75209	4.31459	7.43384
278	0.565526	0.522044	0.64656	0.628423	0.820108	2.45646	4.46043	0.451	0.463	0.568	0.454	0.448	0.451	2.88657	2.59556	2.62039	3.18641	4.21404	12.5383	1.06007	0.953803	0.963323	1.15889	1.43842	2.52879	165.774	134.035	136.611	202.003	353.306	3127.74	3.58822	3.40255	3.41878	3.76998	4.33548	7.47838
277.5	0.569245	0.5233	0.651276	0.631446	0.824258	2.47467	4.46847	0.451	0.463	0.568	0.454	0.448	0.451	2.90555	2.60181	2.6395	3.20174	4.23536	12.6312	1.06662	0.956206	0.97059	1.16369	1.44347	2.53617	168.567	135.166	139.111	204.686	358.178	3185.73	3.60324	3.40971	3.43432	3.78244	4.35035	7.51281
277	0.572901	0.526601	0.65948	0.635792	0.830721	2.50116	4.47653	0.451	0.463	0.568	0.454	0.448	0.451	2.92421	2.61822	2.67275	3.22377	4.26857	12.7665	1.07302	0.962494	0.983109	1.17055	1.45128	2.54682	171.356	137.371	143.153	208.263	365.131	3266.06	3.61805	3.42353	3.459	3.79886	4.37132	7.55973
276.5	0.576348	0.528489	0.664835	0.638569	0.83531	2.51937	4.48463	0.451	0.463	0.568	0.454	0.448	0.451	2.9418	2.62761	2.69445	3.23785	4.29215	12.8594	1.07902	0.966073	0.991196	1.17491	1.45679	2.55408	174.052	138.859	146.014	210.847	370.513	3325.79	3.6322	3.43276	3.47615	3.81059	4.38733	7.59405
276	0.580053	0.53144	0.672604	0.643213	0.841619	2.54651	4.49275	0.451	0.463	0.568	0.454	0.448	0.451	2.96071	2.64228	2.72594	3.2614	4.32457	12.9979	1.08543	0.971642	1.00281	1.18216	1.46431	2.56479	176.937	140.923	149.989	214.701	377.495	3410.15	3.64716	3.44545	3.49957	3.82788	4.40786	7.64176
275.5	0.583543	0.533193	0.677936	0.645934	0.846157	2.56222	4.50091	0.451	0.463	0.568	0.454	0.448	0.451	2.97853	2.65099	2.74755	3.2752	4.34789	13.0781	1.09143	0.974935	1.01071	1.18638	1.46969	2.57094	179.723	142.37	152.93	217.308	382.963	3464.9	3.66143	3.45426	3.5166	3.83945	4.42374	7.67225
275	0.587216	0.536383	0.686262	0.650842	0.852787	2.59101	4.50909	0.451	0.463	0.568	0.454	0.448	0.451	2.99728	2.66685	2.78129	3.30008	4.38195	13.2251	1.0977	0.9809	1.02292	1.19395	1.47749	2.58211	182.655	144.603	157.279	221.426	390.404	3556.1	3.67627	3.46772	3.54134	3.85751	4.44507	7.72224
274.5	0.591031	0.538082	0.69169	0.653902	0.856865	2.60762	4.5173	0.451	0.463	0.568	0.454	0.448	0.451	3.01675	2.6753	2.80329	3.3156	4.40291	13.3098	1.10418	0.984062	1.03079	1.19864	1.48227	2.5885	185.711	146.051	160.36	224.328	395.583	3614.97	3.69155	3.47637	3.55856	3.87009	4.45974	7.75401
274	0.594588	0.54112	0.699685	0.658844	0.863577	2.63588	4.52555	0.451	0.463	0.568	0.454	0.448	0.451	3.0349	2.69041	2.8357	3.34066	4.4374	13.4541	1.11018	0.989692	1.04229	1.20617	1.49007	2.59928	188.639	148.244	164.688	228.563	403.273	3707.24	3.70602	3.48935	3.58233	3.88823	4.48126	7.80302
273.5	0.59835	0.543493	0.705113	0.661438	0.86812	2.6502	4.53382	0.451	0.463	0.568	0.454	0.448	0.451	3.05411	2.7022	2.85769	3.35381	4.46074	13.5272	1.11649	0.994068	1.05001	1.2101	1.49532	2.6047	191.733	150.095	167.865	231.21	409.018	3761.35	3.72112	3.50019	3.59948	3.89943	4.49713	7.83134
273	0.601993	0.546278	0.713263	0.665888	0.8748	2.67596	4.54212	0.451	0.463	0.568	0.454	0.448	0.451	3.0727	2.71605	2.89072	3.37637	4.49507	13.6587	1.12256	0.999179	1.06151	1.2168	1.50298	2.61437	194.786	152.193	172.398	235.19	416.86	3848.88	3.73585	3.51236	3.62354	3.91611	4.51853	7.87651
272.5	0.605793	0.548305	0.719111	0.669414	0.879386	2.69213	4.55046	0.451	0.463	0.568	0.454	0.448	0.451	3.0921	2.72613	2.91443	3.39425	4.51863	13.7412	1.12885	1.00288	1.06967	1.22208	1.50821	2.6204	197.978	153.888	175.88	238.561	422.789	3909.85	3.75106	3.52209	3.6417	3.93006	4.53452	7.90751
272	0.609548	0.552048	0.727093	0.674145	0.886365	2.72085	4.55882	0.451	0.463	0.568	0.454	0.448	0.451	3.11126	2.74474	2.94677	3.41824	4.55449	13.8878	1.13503	1.00969	1.08071	1.22913	1.51611	2.63101	201.177	156.57	180.468	242.835	431.107	4008.41	3.76613	3.53734	3.66522	3.94755	4.55666	7.95688
271.5	0.613482	0.553813	0.732728	0.677409	0.890775	2.73612	4.56722	0.451	0.463	0.568	0.454	0.448	0.451	3.13134	2.75352	2.96961	3.43479	4.57715	13.9657	1.14146	1.01288	1.08843	1.23396	1.52108	2.63661	204.534	158.153	183.951	246.096	437.013	4068.47	3.78174	3.54625	3.68278	3.96074	4.57218	7.98653
271	0.617264	0.557049	0.741107	0.682252	0.897394	2.76087	4.57565	0.451	0.463	0.568	0.454	0.448	0.451	3.15065	2.7696	3.00357	3.45935	4.61116	14.0921	1.14761	1.0187	1.0998	1.24108	1.52848	2.64561	207.828	160.598	188.878	250.549	445.17	4157.71	3.79687	3.55988	3.70719	3.97854	4.59337	8.02996
270.5	0.621103	0.559238	0.7463	0.685187	0.902505	2.77824	4.5841	0.451	0.463	0.568	0.454	0.448	0.451	3.17024	2.78049	3.02462	3.47423	4.63743	14.1807	1.15381	1.02263	1.10678	1.24537	1.53416	2.65188	211.2	162.462	192.243	253.645	451.921	4225.77	3.81218	3.57016	3.72359	3.99077	4.61069	8.06263
270	0.624906	0.56283	0.754948	0.690046	0.909428	2.80368	4.59259	0.451	0.463	0.568	0.454	0.448	0.451	3.18965	2.79835	3.05967	3.49887	4.673	14.3106	1.15991	1.02903	1.11831	1.25244	1.5418	2.661	214.587	165.165	197.453	258.209	460.582	4319.47	3.82737	3.58492	3.74857	4.0086	4.63262	8.10695
269.5	0.628746	0.564833	0.760267	0.693578	0.914349	2.81926	4.60111	0.451	0.463	0.568	0.454	0.448	0.451	3.20925	2.80831	3.08122	3.51678	4.69828	14.3901	1.16604	1.03258	1.12533	1.25754	1.5472	2.66654	218.039	166.961	200.989	261.828	467.309	4383.83	3.84267	3.59463	3.76524	4.02257	4.64944	8.13698
269	0.632788	0.56857	0.768862	0.698426	0.921358	2.84417	4.60967	0.451	0.463	0.568	0.454	0.448	0.451	3.22988	2.82689	3.11606	3.54136	4.7343	14.5172	1.17245	1.03918	1.13657	1.26451	1.55483	2.67534	221.673	169.807	206.324	266.489	476.267	4478.24	3.85859	3.60985	3.78998	4.04036	4.67157	8.18044
268.5	0.636734	0.57065	0.774716	0.701522	0.925801	2.86378	4.61825	0.451	0.463	0.568	0.454	0.448	0.451	3.25003	2.83723	3.13978	3.55706	4.75713	14.6173	1.17866	1.04283	1.14415	1.26893	1.55964	2.68221	225.283	171.689	210.259	269.859	482.664	4557.13	3.8742	3.61981	3.80793	4.05307	4.68718	8.21624
268	0.64064	0.5742	0.783343	0.706741	0.933121	2.88455	4.62687	0.451	0.463	0.568	0.454	0.448	0.451	3.26996	2.85488	3.17475	3.58352	4.79474	14.7234	1.18478	1.04903	1.15523	1.27635	1.56752	2.68944	228.907	174.481	215.77	274.912	492.158	4640.74	3.88969	3.63444	3.83264	4.07191	4.71006	8.25367
267.5	0.644513	0.576568	0.789006	0.710127	0.938187	2.90572	4.63551	0.451	0.463	0.568	0.454	0.448	0.451	3.28973	2.86665	3.1977	3.60069	4.82077	14.8314	1.19081	1.05314	1.16243	1.28112	1.57293	2.69675	232.55	176.582	219.72	278.591	499.378	4726.73	3.90507	3.64533	3.85006	4.08547	4.72724	8.29164
267	0.648636	0.580374	0.797395	0.715505	0.945426	2.92619	4.64419	0.451	0.463	0.568	0.454	0.448	0.451	3.31078	2.88557	3.2317	3.62796	4.85797	14.9359	1.19718	1.05972	1.17301	1.28867	1.58062	2.70377	236.418	179.591	225.259	283.887	509.015	4811.53	3.92121	3.66076	3.8741	4.10475	4.74988	8.32858
266.5	0.652776	0.582957	0.803272	0.718617	0.950215	2.94242	4.65291	0.451	0.463	0.568	0.454	0.448	0.451	3.33191	2.89842	3.25551	3.64374	4.88258	15.0187	1.20355	1.06416	1.18035	1.29301	1.58567	2.7093	240.345	181.874	229.45	287.437	516.116	4883.33	3.93739	3.67234	3.89199	4.11752	4.76636	8.35947
266	0.656828	0.586566	0.81177	0.724373	0.957682	2.96453	4.66165	0.451	0.463	0.568	0.454	0.448	0.451	3.35259	2.91636	3.28996	3.67292	4.92095	15.1316	1.20973	1.07034	1.19087	1.30099	1.5935	2.71678	244.254	184.826	235.212	293.159	526.232	4975.64	3.9533	3.68715	3.9162	4.13786	4.78955	8.39871
265.5	0.661011	0.589087	0.817996	0.72787	0.962364	2.97932	4.67043	0.451	0.463	0.568	0.454	0.448	0.451	3.37394	2.92889	3.31519	3.69065	4.945	15.2071	1.21608	1.07463	1.19851	1.3058	1.59838	2.72176	248.307	187.121	239.735	297.112	533.393	5044.36	3.96961	3.69854	3.93489	4.15174	4.80576	8.42755
265	0.664986	0.593332	0.826753	0.733028	0.96999	3.00212	4.67925	0.451	0.463	0.568	0.454	0.448	0.451	3.39423	2.95	3.35068	3.71681	4.98419	15.3235	1.22208	1.08181	1.20916	1.31287	1.60627	2.72938	252.252	190.544	245.82	302.477	543.927	5141.21	3.98528	3.71534	3.95963	4.17035	4.82931	8.46772
264.5	0.669318	0.595643	0.832731	0.736607	0.975085	3.01963	4.68809	0.451	0.463	0.568	0.454	0.448	0.451	3.41634	2.96149	3.37491	3.73495	5.01037	15.4128	1.22857	1.08569	1.21637	1.31774	1.61151	2.7352	256.516	192.758	250.331	306.593	551.736	5221.04	4.00201	3.72609	3.97767	4.18447	4.84655	8.5004
264	0.673461	0.599576	0.841463	0.742066	0.983137	3.04186	4.69697	0.451	0.463	0.568	0.454	0.448	0.451	3.43749	2.98105	3.4103	3.76263	5.05174	15.5263	1.23474	1.09227	1.2268	1.32512	1.61973	2.74254	260.686	196.053	256.578	312.334	563.013	5318.28	4.01818	3.74191	4.00226	4.20392	4.87113	8.53971
263.5	0.677683	0.602303	0.847289	0.745801	0.988126	3.05739	4.70588	0.451	0.463	0.568	0.454	0.448	0.451	3.45904	2.9946	3.43391	3.78157	5.07738	15.6056	1.24099	1.09681	1.2337	1.33014	1.6248	2.74763	264.968	198.592	261.131	316.685	570.902	5393.14	4.03458	3.75396	4.0199	4.21849	4.8881	8.5696
263	0.682046	0.606711	0.856292	0.751176	0.995962	3.08004	4.71483	0.451	0.463	0.568	0.454	0.448	0.451	3.48131	3.01652	3.47039	3.80883	5.11764	15.7212	1.24741	1.1041	1.24427	1.33732	1.63269	2.75501	269.412	202.276	267.725	322.488	582.2	5494.17	4.05139	3.77126	4.04504	4.23768	4.91211	8.60945
262.5	0.686324	0.609497	0.862348	0.755254	1.00124	3.0965	4.72381	0.451	0.463	0.568	0.454	0.448	0.451	3.50314	3.03037	3.49494	3.8295	5.14476	15.8052	1.25366	1.10869	1.25132	1.34274	1.63798	2.76034	273.842	204.916	272.561	327.243	590.63	5574.22	4.06795	3.7835	4.06318	4.25322	4.9298	8.64064
262	0.690695	0.613833	0.871095	0.761116	1.00902	3.11724	4.73282	0.451	0.463	0.568	0.454	0.448	0.451	3.52545	3.05193	3.53039	3.85923	5.18474	15.9111	1.26001	1.11577	1.26141	1.35047	1.64572	2.76701	278.401	208.636	279.181	333.612	602.136	5670.73	4.08477	3.80056	4.08763	4.27376	4.95363	8.6778
261.5	0.694946	0.616972	0.877623	0.764861	1.01413	3.12715	4.74187	0.451	0.463	0.568	0.454	0.448	0.451	3.54715	3.06754	3.55685	3.87822	5.211	15.9616	1.26615	1.12087	1.26887	1.35538	1.65077	2.77019	282.917	211.582	284.466	338.192	610.579	5728.69	4.10124	3.81391	4.10684	4.28836	4.97091	8.69989
261	0.699385	0.62109	0.886298	0.77043	1.02195	3.15291	4.75096	0.451	0.463	0.568	0.454	0.448	0.451	3.56981	3.08801	3.592	3.90645	5.25118	16.0931	1.27251	1.12753	1.27871	1.36263	1.65845	2.77839	287.642	215.239	291.23	344.451	622.41	5845.79	4.11825	3.83028	4.13104	4.30806	4.99481	8.74401
260.5	0.70382	0.624081	0.892421	0.774705	1.02751	3.16377	4.76008	0.451	0.463	0.568	0.454	0.448	0.451	3.59245	3.10288	3.61682	3.92813	5.27975	16.1486	1.27883	1.13233	1.28559	1.36816	1.66388	2.78183	292.421	218.152	296.402	349.623	631.618	5908.75	4.13525	3.84317	4.14926	4.32414	5.01318	8.76746
260	0.708318	0.628758	0.901269	0.780414	1.03517	3.183	4.76923	0.451	0.463	0.568	0.454	0.448	0.451	3.61541	3.12614	3.65268	3.95708	5.31911	16.2467	1.2852	1.1398	1.29546	1.37551	1.67131	2.78789	297.311	222.286	303.473	356.16	643.539	6003.82	4.15243	3.86125	4.17378	4.34422	5.03667	8.80252
259.5	0.712727	0.632018	0.90706	0.784027	1.04089	3.19524	4.77842	0.451	0.463	0.568	0.454	0.448	0.451	3.63791	3.14234	3.67615	3.9754	5.3485	16.3092	1.29141	1.14497	1.30187	1.38012	1.67682	2.79173	302.185	225.463	308.571	360.852	653.18	6073.42	4.16935	3.87498	4.1912	4.35845	5.05543	8.82792
259	0.717309	0.63682	0.916313	0.790215	1.04945	3.21435	4.78764	0.451	0.463	0.568	0.454	0.448	0.451	3.6613	3.16622	3.71365	4.00677	5.39249	16.4067	1.29782	1.15254	1.31201	1.38799	1.68501	2.79769	307.266	229.787	316.115	367.988	666.533	6170.04	4.18676	3.89342	4.21659	4.37984	5.08107	8.86282
258.5	0.72172	0.639975	0.922228	0.794294	1.05466	3.22887	4.79691	0.451	0.463	0.568	0.454	0.448	0.451	3.68381	3.18191	3.73762	4.02746	5.41926	16.4808	1.30395	1.15748	1.31845	1.39313	1.68996	2.8022	312.261	232.968	321.45	373.236	675.775	6250.01	4.20368	3.90683	4.23427	4.39538	5.09859	8.8914
258	0.7263	0.645013	0.931109	0.800262	1.06259	3.25019	4.8062	0.451	0.463	0.568	0.454	0.448	0.451	3.70719	3.20695	3.77361	4.05772	5.46	16.5897	1.31027	1.16532	1.32803	1.40062	1.69745	2.80878	317.463	237.569	328.942	380.336	688.636	6357.39	4.22108	3.92597	4.25873	4.41613	5.12268	8.92935
257.5	0.730994	0.648268	0.937537	0.804166	1.06815	3.26652	4.81553	0.451	0.463	0.568	0.454	0.448	0.451	3.73115	3.22314	3.79967	4.07751	5.48857	16.673	1.31672	1.17036	1.33491	1.40549	1.70267	2.81379	322.83	240.906	334.796	385.549	698.567	6446.4	4.23881	3.93969	4.27755	4.43118	5.14105	8.96044
257	0.73558	0.653391	0.946433	0.810766	1.07676	3.27602	4.8249	0.451	0.463	0.568	0.454	0.448	0.451	3.75456	3.24861	3.83572	4.11098	5.53282	16.7215	1.32297	1.17823	1.34436	1.41366	1.7107	2.8167	328.167	245.681	342.508	393.43	712.639	6509.2	4.25622	3.95907	4.30197	4.45366	5.16675	8.98218
256.5	0.740279	0.656574	0.951906	0.815125	1.08243	3.28958	4.83431	0.451	0.463	0.568	0.454	0.448	0.451	3.77854	3.26443	3.8579	4.13308	5.56195	16.7907	1.32934	1.18309	1.35012	1.41902	1.71595	2.82083	333.67	249.049	347.833	399.223	722.974	6588.81	4.27395	3.97257	4.3186	4.46996	5.18538	9.00952
256	0.745145	0.662273	0.96148	0.821096	1.0909	3.30739	4.84375	0.451	0.463	0.568	0.454	0.448	0.451	3.80338	3.29277	3.8967	4.16335	5.60547	16.8816	1.33589	1.19173	1.36013	1.42632	1.72374	2.82623	339.393	254.382	356.252	406.678	737.204	6686.39	4.29216	3.99366	4.3445	4.49068	5.21071	9.0427
255.5	0.749998	0.66561	0.967448	0.82559	1.09678	3.31908	4.85323	0.451	0.463	0.568	0.454	0.448	0.451	3.82815	3.30936	3.92089	4.18614	5.63569	16.9413	1.34238	1.19676	1.36632	1.43178	1.72912	2.82975	345.175	257.959	362.102	412.752	748.092	6760.12	4.31032	4.00763	4.36222	4.50736	5.22984	9.06752
255	0.7548	0.671422	0.976496	0.832045	1.10469	3.32925	4.86275	0.451	0.463	0.568	0.454	0.448	0.451	3.85266	3.33826	3.95756	4.21887	5.67633	16.9932	1.34876	1.20545	1.37563	1.43957	1.73631	2.83281	350.982	263.513	370.355	420.877	761.901	6828.31	4.32834	4.02903	4.38687	4.52938	5.25381	9.0903
254.5	0.759645	0.674674	0.982854	0.83622	1.11074	3.34561	4.8723	0.451	0.463	0.568	0.454	0.448	0.451	3.87739	3.35443	3.98333	4.24004	5.70742	17.0767	1.35516	1.21028	1.38212	1.44457	1.74177	2.83772	356.9	267.119	376.669	426.784	773.299	6922.71	4.34647	4.04274	4.40545	4.54519	5.27335	9.12156
254	0.764367	0.680406	0.991823	0.842856	1.1193	3.35482	4.88189	0.451	0.463	0.568	0.454	0.448	0.451	3.90149	3.38293	4.01968	4.27369	5.7514	17.1237	1.36136	1.21874	1.3912	1.45248	1.74944	2.84046	362.775	272.748	385.086	435.293	788.358	6988.31	4.36425	4.06387	4.42986	4.56768	5.29884	9.14309
253.5	0.769111	0.684205	0.997761	0.846954	1.12541	3.36804	4.89152	0.451	0.463	0.568	0.454	0.448	0.451	3.92571	3.40181	4.04374	4.29447	5.7828	17.1912	1.36755	1.22431	1.39717	1.45733	1.75489	2.8444	368.742	276.891	391.25	441.272	800.136	7071.3	4.38208	4.07922	4.44748	4.58328	5.31852	9.17012
253	0.774084	0.689582	1.00699	0.853832	1.13366	3.38688	4.90119	0.451	0.463	0.568	0.454	0.448	0.451	3.95109	3.42855	4.08115	4.32934	5.82519	17.2874	1.37399	1.23214	1.40638	1.46542	1.76219	2.84998	375.004	282.373	400.098	450.242	815.122	7178.93	4.40057	4.09926	4.47241	4.6064	5.34325	9.20481
252.5	0.778713	0.693553	1.01302	0.858197	1.1393	3.40143	4.91089	0.451	0.463	0.568	0.454	0.448	0.451	3.97472	3.44829	4.10558	4.35147	5.85417	17.3616	1.37995	1.23788	1.41235	1.47051	1.76715	2.85426	381.007	286.767	406.509	456.661	826.516	7269.44	4.41808	4.11512	4.49022	4.62273	5.36183	9.23369
252	0.783448	0.699646	1.02155	0.864725	1.14801	3.41224	4.92063	0.451	0.463	0.568	0.454	0.448	0.451	3.99889	3.47859	4.14016	4.38457	5.89893	17.4168	1.38602	1.24663	1.42073	1.47809	1.77477	2.85744	387.186	292.987	415.026	465.476	842.536	7344.78	4.43588	4.13725	4.51356	4.64488	5.38762	9.25752
251.5	0.788219	0.703377	1.02772	0.869055	1.15373	3.41629	4.93042	0.451	0.463	0.568	0.454	0.448	0.451	4.02324	3.49714	4.16516	4.40653	5.92832	17.4375	1.39209	1.25194	1.42675	1.48309	1.77974	2.85862	393.476	297.298	421.727	472.02	854.339	7391.53	4.45379	4.15239	4.53166	4.66112	5.40639	9.27222
251	0.792905	0.709576	1.03697	0.876001	1.16268	3.4386	4.94024	0.451	0.463	0.568	0.454	0.448	0.451	4.04716	3.52796	4.20265	4.44175	5.97431	17.5513	1.39801	1.26072	1.43572	1.49105	1.78747	2.86513	399.757	303.768	431.065	481.509	871.106	7518.25	4.47146	4.1748	4.55654	4.68437	5.43273	9.3117
250.5	0.79771	0.713462	1.04293	0.880832	1.16899	3.4449	4.9501	0.451	0.463	0.568	0.454	0.448	0.451	4.07168	3.54728	4.2268	4.46625	6.00673	17.5835	1.40406	1.26618	1.44145	1.49655	1.79288	2.86696	406.233	308.332	437.776	488.78	884.106	7575.98	4.48946	4.19039	4.57418	4.70195	5.45288	9.32953
250	0.80246	0.719564	1.05195	0.887299	1.17733	3.45072	4.96	0.451	0.463	0.568	0.454	0.448	0.451	4.09593	3.57762	4.26336	4.49904	6.04958	17.6132	1.40999	1.2747	1.45006	1.50386	1.79999	2.86865	412.732	314.884	447.165	497.969	900.356	7632.03	4.5073	4.21248	4.59851	4.7239	5.47777	9.34674
249.5	0.807399	0.723793	1.05789	0.892189	1.18344	3.46551	4.96994	0.451	0.463	0.568	0.454	0.448	0.451	4.12114	3.59864	4.28743	4.52383	6.08098	17.6887	1.41613	1.28056	1.45569	1.50936	1.80517	2.87293	419.504	319.875	454.043	505.493	913.376	7728.48	4.52568	4.22907	4.61609	4.74164	5.49746	9.37613
249	0.812206	0.730238	1.06657	0.899494	1.1925	3.47869	4.97992	0.451	0.463	0.568	0.454	0.448	0.451	4.14567	3.63069	4.32261	4.56087	6.12753	17.756	1.42206	1.28942	1.46386	1.51751	1.81279	2.87672	426.221	326.905	463.38	515.87	931.142	7818.68	4.54369	4.25212	4.63964	4.76579	5.524	9.40337
248.5	0.817001	0.734245	1.07276	0.904104	1.19872	3.48658	4.98994	0.451	0.463	0.568	0.454	0.448	0.451	4.17015	3.65061	4.3477	4.58425	6.15949	17.7962	1.42795	1.29489	1.46965	1.52263	1.81799	2.87899	433.005	331.834	470.663	523.271	944.671	7885.83	4.56166	4.26806	4.65776	4.78279	5.54396	9.42349
248	0.821752	0.741056	1.08123	0.91111	1.20751	3.4937	5	0.451	0.463	0.568	0.454	0.448	0.451	4.1944	3.68447	4.38203	4.61977	6.20466	17.8326	1.43375	1.30413	1.47751	1.53034	1.8253	2.88103	439.824	339.383	480.054	533.557	962.445	7950.03	4.57952	4.29213	4.68083	4.80613	5.56986	9.44261
247.5	0.826433	0.745723	1.08736	0.915361	1.21356	3.50479	5.0101	0.451	0.463	0.568	0.454	0.448	0.451	4.21829	3.70768	4.40687	4.64132	6.23575	17.8892	1.43943	1.31041	1.48316	1.535	1.8303	2.8842	446.648	345.062	487.476	540.725	976.046	8032.94	4.59718	4.30997	4.69882	4.82219	5.58943	9.46714
247	0.831205	0.752159	1.09586	0.923109	1.22248	3.511	5.02024	0.451	0.463	0.568	0.454	0.448	0.451	4.24265	3.73968	4.44132	4.68061	6.28158	17.9209	1.44519	1.319	1.49095	1.54343	1.83762	2.88597	453.653	352.466	497.134	552.147	994.461	8094.1	4.6151	4.33291	4.72192	4.84745	5.61561	9.48511
246.5	0.835909	0.756572	1.10213	0.927765	1.22875	3.51973	5.03043	0.451	0.463	0.568	0.454	0.448	0.451	4.26666	3.76162	4.46673	4.70422	6.3138	17.9655	1.45083	1.32485	1.49666	1.54846	1.84274	2.88845	460.665	358.062	504.881	559.995	1008.77	8167.44	4.63283	4.35	4.74021	4.86459	5.6357	9.50652
246	0.840624	0.763286	1.11086	0.935308	1.23781	3.53093	5.04065	0.451	0.463	0.568	0.454	0.448	0.451	4.29072	3.795	4.50211	4.74246	6.36035	18.0226	1.45646	1.33368	1.50455	1.55656	1.85008	2.89163	467.772	365.929	514.998	571.454	1027.86	8252.94	4.6506	4.3737	4.76378	4.88928	5.66218	9.5313
245.5	0.845259	0.768007	1.11669	0.939793	1.24402	3.53851	5.05092	0.451	0.463	0.568	0.454	0.448	0.451	4.31438	3.81847	4.52574	4.76521	6.39226	18.0613	1.46195	1.33985	1.50978	1.56134	1.85509	2.89377	474.873	371.98	522.54	579.3	1042.44	8322.21	4.66815	4.39167	4.78112	4.90598	5.68215	9.55124
245	0.850048	0.774653	1.12525	0.946727	1.2533	3.5517	5.06122	0.451	0.463	0.568	0.454	0.448	0.451	4.33883	3.85151	4.56043	4.80036	6.43995	18.1286	1.4676	1.34847	1.51742	1.56869	1.86252	2.89749	482.232	379.992	532.75	590.282	1062.37	8418.63	4.68613	4.41513	4.80431	4.92907	5.70912	9.57878
244.5	0.854557	0.779211	1.13087	0.952261	1.25911	3.54836	5.07157	0.451	0.463	0.568	0.454	0.448	0.451	4.36184	3.87418	4.58321	4.82842	6.4698	18.1116	1.47289	1.35433	1.5224	1.57452	1.86715	2.89655	489.356	386.051	540.288	599.648	1076.63	8437.2	4.70334	4.43263	4.82121	4.94851	5.72818	9.58406
244	0.859131	0.786069	1.13976	0.959534	1.26828	3.57249	5.08197	0.451	0.463	0.568	0.454	0.448	0.451	4.38519	3.90827	4.61924	4.8653	6.51692	18.2347	1.47823	1.3631	1.53023	1.58213	1.8744	2.90333	496.638	394.488	551.067	611.341	1096.85	8587.43	4.72074	4.45665	4.84508	4.97245	5.75489	9.62644
243.5	0.863725	0.790791	1.14556	0.964498	1.27475	3.57588	5.0924	0.451	0.463	0.568	0.454	0.448	0.451	4.40864	3.93175	4.64274	4.89047	6.55017	18.2521	1.48357	1.36908	1.53531	1.58729	1.87949	2.90428	504.027	400.883	558.978	620.222	1112.63	8639.11	4.7382	4.4746	4.86238	4.99042	5.77547	9.64089
243	0.868214	0.797783	1.15381	0.972054	1.28378	3.58103	5.10288	0.451	0.463	0.568	0.454	0.448	0.451	4.43155	3.96652	4.67618	4.92878	6.59657	18.2783	1.48875	1.37789	1.54248	1.59509	1.88655	2.90572	511.378	409.684	569.395	632.573	1133.1	8699.7	4.75538	4.49896	4.88487	5.01508	5.80185	9.65775
242.5	0.872581	0.802175	1.15985	0.977035	1.28964	3.59108	5.1134	0.451	0.463	0.568	0.454	0.448	0.451	4.45384	3.98835	4.70066	4.95404	6.62668	18.3296	1.49377	1.38338	1.5477	1.6002	1.8911	2.90852	518.667	415.917	577.747	641.71	1148.18	8784.71	4.77224	4.51598	4.90269	5.03309	5.82107	9.68126
242	0.876992	0.809386	1.16832	0.984594	1.299	3.59031	5.12397	0.451	0.463	0.568	0.454	0.448	0.451	4.47635	4.0242	4.73499	4.99237	6.67477	18.3257	1.49881	1.39233	1.55498	1.60791	1.89834	2.9083	526.092	425.18	588.641	654.374	1169.73	8817.27	4.78923	4.54091	4.92564	5.05774	5.84819	9.69022
241.5	0.881213	0.814202	1.17421	0.98973	1.30523	3.59665	5.13458	0.451	0.463	0.568	0.454	0.448	0.451	4.4979	4.04815	4.75886	5.01841	6.70678	18.3581	1.50361	1.39826	1.56001	1.61311	1.90312	2.91007	533.37	432.038	597.055	663.959	1185.87	8885.11	4.80571	4.55911	4.94315	5.07616	5.86826	9.7088
241	0.885449	0.821595	1.18191	0.997499	1.3142	3.61263	5.14523	0.451	0.463	0.568	0.454	0.448	0.451	4.51952	4.08491	4.79006	5.0578	6.75288	18.4396	1.50841	1.4073	1.56654	1.62093	1.90997	2.9145	540.747	441.747	607.424	677.225	1207.22	9001.48	4.82224	4.58451	4.96447	5.10133	5.8945	9.74044
240.5	0.889546	0.826314	1.18761	1.00254	1.32011	3.61119	5.15593	0.451	0.463	0.568	0.454	0.448	0.451	4.54043	4.10837	4.81317	5.08336	6.78324	18.4323	1.51302	1.41303	1.57136	1.62597	1.91446	2.9141	548.034	448.696	615.85	686.935	1223.17	9031.74	4.8384	4.60244	4.9816	5.11952	5.91387	9.74861
[truncated: 81 more rows]
[truncated: 72 more columns]
